# Supplementary material
Source: HighWire-hosted journal article supplement (https://gut.bmj.com/content/72/1/153)
Supplement: inline-supplementary-material-6 [file inline-supplementary-material-6.xlsx]

## Sheet: TCR
barcode	clone.id	patient	clone.seq	c_gene	v_gene.x	j_gene.x	cdr3_nt.x	CType	v_gene.y	j_gene.y	cdr3_nt.y	clone.freq	loc	identifier	clonal	MAIT_flag	iNKT_flag
AAACCTGAGGGTGTTG-1-P190604_Blood_1	clone_P190604:10443:1	P190604	P190604_TRAV29/DV5_TGTGCAGCAAGCGGAGAAGAAACCAGTGGCTCTAGGTTGACCTTT_TRAJ58:P190604_TRBV10-1_TGCGCCAGCAGTACCGGGACAGGGACCCTCATGGGGAATGAGCAGTTCTTC_TRBJ2-1	TRAC	TRAV29/DV5	TRAJ58	TGTGCAGCAAGCGGAGAAGAAACCAGTGGCTCTAGGTTGACCTTT	TRAC	TRBV10-1	TRBJ2-1	TGCGCCAGCAGTACCGGGACAGGGACCCTCATGGGGAATGAGCAGTTCTTC	1	Blood	10443	FALSE	FALSE	FALSE
AAACGGGCACGCTTTC-1-P190604_Blood_1	clone_P190604:10222:26	P190604	P190604_TRAV23/DV6_TGTGCAGCAAGGGACACCGACAAGCTCATCTTT_TRAJ34:P190604_TRBV7-3_TGTGCCAGCAGCTTAAGACAGGGCGTGGAGGATACGCAGTATTTT_TRBJ2-3	TRAC	TRAV23/DV6	TRAJ34	TGTGCAGCAAGGGACACCGACAAGCTCATCTTT	TRAC	TRBV7-3	TRBJ2-3	TGTGCCAGCAGCTTAAGACAGGGCGTGGAGGATACGCAGTATTTT	26	Blood	10222	TRUE	FALSE	FALSE
AAAGATGGTTCTGAAC-1-P190604_Blood_1	clone_P190604:10026:1	P190604	P190604_TRAV2_TGTGCCGATCCTTATGGAGGAAGCCAAGGAAATCTCATCTTT_TRAJ42:P190604_TRBV6-6_TGTGCCAGCAGTTACTCTTCCCAGGGGGCGGATCAGCCCCAGCATTTT_TRBJ1-5	TRAC	TRAV2	TRAJ42	TGTGCCGATCCTTATGGAGGAAGCCAAGGAAATCTCATCTTT	TRAC	TRBV6-6	TRBJ1-5	TGTGCCAGCAGTTACTCTTCCCAGGGGGCGGATCAGCCCCAGCATTTT	1	Blood	10026	FALSE	FALSE	FALSE
AAAGTAGCAGGCAGTA-1-P190604_Blood_1	clone_P190604:10974:1	P190604	P190604_TRAV9-2_TGTGCTCTCCTATCAACCAGTGGCTCTAGGTTGACCTTT_TRAJ58:P190604_TRBV7-9_TGTGCCAGCAGCTTAGCGGCGGAGGCGGTTGGCTACACCTTC_TRBJ1-2	TRAC	TRAV9-2	TRAJ58	TGTGCTCTCCTATCAACCAGTGGCTCTAGGTTGACCTTT	TRAC	TRBV7-9	TRBJ1-2	TGTGCCAGCAGCTTAGCGGCGGAGGCGGTTGGCTACACCTTC	1	Blood	10974	FALSE	FALSE	FALSE
AACCATGAGGAGTCTG-1-P190604_Blood_1	clone_P190604:11003:1	P190604	P190604_TRAV9-2_TGTGCTCTGAGTGAAGTCAGCTTTCAGAAACTTGTATTT_TRAJ8:P190604_TRBV20-1_TGCAGTGCTAGACTAGCGGGAGCAAAAATCTACAATGAGCAGTTCTTC_TRBJ2-1	TRAC	TRAV9-2	TRAJ8	TGTGCTCTGAGTGAAGTCAGCTTTCAGAAACTTGTATTT	TRAC	TRBV20-1	TRBJ2-1	TGCAGTGCTAGACTAGCGGGAGCAAAAATCTACAATGAGCAGTTCTTC	1	Blood	11003	FALSE	FALSE	FALSE
AACCATGGTGGCCCTA-1-P190604_Blood_1	clone_P190604:11020:1	P190604	P190604_TRAV9-2_TGTGCTCTGAGTGATGTGGGTTCTGCAAGGCAACTGACCTTT_TRAJ22:P190604_TRBV18_TGTGCCAGCTCACCTTTGGGAGCCGAGGGCAATGAGCAGTTCTTC_TRBJ2-1	TRAC	TRAV9-2	TRAJ22	TGTGCTCTGAGTGATGTGGGTTCTGCAAGGCAACTGACCTTT	TRAC	TRBV18	TRBJ2-1	TGTGCCAGCTCACCTTTGGGAGCCGAGGGCAATGAGCAGTTCTTC	1	Blood	11020	FALSE	FALSE	FALSE
AACCGCGCAGATGGGT-1-P190604_Blood_1	clone_P190604:10589:1	P190604	P190604_TRAV35_TGTGCTGGGCCTAGGGGGGGCCAGAAGCTGCTCTTT_TRAJ16:P190604_TRBV2_TGTGCCAGCAGTGGACAGTGGAGGGGGAACACTGAAGCTTTCTTT_TRBJ1-1	TRAC	TRAV35	TRAJ16	TGTGCTGGGCCTAGGGGGGGCCAGAAGCTGCTCTTT	TRAC	TRBV2	TRBJ1-1	TGTGCCAGCAGTGGACAGTGGAGGGGGAACACTGAAGCTTTCTTT	1	Blood	10589	FALSE	FALSE	FALSE
AACCGCGGTTCGGGCT-1-P190604_Blood_1	clone_P190604:9452:1	P190604	P190604_TRAV1-2_TGTGCTGTGATGGATAGCAGCTATAAATTGATCTTC_TRAJ12:P190604_TRBV6-4_TGTGCCAGCAGTGACTCGAGCGGCTCCTACAATGAGCAGTTCTTC_TRBJ2-1	TRAC	TRAV1-2	TRAJ12	TGTGCTGTGATGGATAGCAGCTATAAATTGATCTTC	TRAC	TRBV6-4	TRBJ2-1	TGTGCCAGCAGTGACTCGAGCGGCTCCTACAATGAGCAGTTCTTC	1	Blood	9452	FALSE	TRUE	FALSE
AACGTTGGTCAAACTC-1-P190604_Blood_1	clone_P190604:11030:1	P190604	P190604_TRAV9-2_TGTGCTCTGAGTTGGGCAGGCTTTGGGAATGTGCTGCATTGC_TRAJ35:P190604_TRBV19_TGTGCCAGTAGGTTACAGGGAGAAGCTTTCTTT_TRBJ1-1	TRAC	TRAV9-2	TRAJ35	TGTGCTCTGAGTTGGGCAGGCTTTGGGAATGTGCTGCATTGC	TRAC	TRBV19	TRBJ1-1	TGTGCCAGTAGGTTACAGGGAGAAGCTTTCTTT	1	Blood	11030	FALSE	FALSE	FALSE
AACTCCCAGGCCGAAT-1-P190604_Blood_1	clone_P190604:10983:20	P190604	P190604_TRAV9-2_TGTGCTCTGAGAAATACTGGAGGCTTCAAAACTATCTTT_TRAJ9:P190604_TRBV7-2_TGTGCCAGCAGCTCCGAAGCCAATCAGCCCCAGCATTTT_TRBJ1-5	TRAC	TRAV9-2	TRAJ9	TGTGCTCTGAGAAATACTGGAGGCTTCAAAACTATCTTT	TRAC	TRBV7-2	TRBJ1-5	TGTGCCAGCAGCTCCGAAGCCAATCAGCCCCAGCATTTT	20	Blood	10983	TRUE	FALSE	FALSE
AACTCTTAGTTTGCGT-1-P190604_Blood_1	clone_P190604:10415:1	P190604	P190604_TRAV29/DV5_TGTGCAGCAAGCGAGGGGGGTCAGAATTTTGTCTTT_TRAJ26:P190604_TRBV7-9_TGTGCCAGCAGCTTAGGTCACAGCTATGGCTACACCTTC_TRBJ1-2	TRAC	TRAV29/DV5	TRAJ26	TGTGCAGCAAGCGAGGGGGGTCAGAATTTTGTCTTT	TRAC	TRBV7-9	TRBJ1-2	TGTGCCAGCAGCTTAGGTCACAGCTATGGCTACACCTTC	1	Blood	10415	FALSE	FALSE	FALSE
AACTCTTGTCTCCATC-1-P190604_Blood_1	clone_P190604:10526:1	P190604	P190604_TRAV3_TGTGCTGTGAGAGATACGGGAGGAGGAAACAAACTCACCTTT_TRAJ10:P190604_TRBV20-1_TGCAGTGCTAGAGATGAGGCTAGCGGGGTGGTGGGCGGGGAGCTGTTTTTT_TRBJ2-2	TRAC	TRAV3	TRAJ10	TGTGCTGTGAGAGATACGGGAGGAGGAAACAAACTCACCTTT	TRAC	TRBV20-1	TRBJ2-2	TGCAGTGCTAGAGATGAGGCTAGCGGGGTGGTGGGCGGGGAGCTGTTTTTT	1	Blood	10526	FALSE	FALSE	FALSE
AACTTTCGTGAGTGAC-1-P190604_Blood_1	clone_P190604:10768:2	P190604	P190604_TRAV6_TGTGCTCTAGATACGGATAGCAGCTATAAATTGATCTTC_TRAJ12:P190604_TRBV5-1_TGCGCCAGCAGCCCGCCAGGAGAGATTCAGTACTTC_TRBJ2-4	TRAC	TRAV6	TRAJ12	TGTGCTCTAGATACGGATAGCAGCTATAAATTGATCTTC	TRAC	TRBV5-1	TRBJ2-4	TGCGCCAGCAGCCCGCCAGGAGAGATTCAGTACTTC	2	Blood	10768	TRUE	FALSE	FALSE
AAGCCGCCAAGGGTCA-1-P190604_Blood_1	clone_P190604:10421:60	P190604	P190604_TRAV29/DV5_TGTGCAGCAAGCGCCCATAGTGGAGGTAGCAACTATAAACTGACATTT_TRAJ53:P190604_TRBV7-9_TGTGCCACCAGATTAGGGTACGAGCAGTACTTC_TRBJ2-7	TRAC	TRAV29/DV5	TRAJ53	TGTGCAGCAAGCGCCCATAGTGGAGGTAGCAACTATAAACTGACATTT	TRAC	TRBV7-9	TRBJ2-7	TGTGCCACCAGATTAGGGTACGAGCAGTACTTC	60	Blood	10421	TRUE	FALSE	FALSE
AAGCCGCTCAGAGGTG-1-P190604_Blood_1	clone_P190604:9786:1	P190604	P190604_TRAV13-2_TGTGCAGAGACCCCCCCCACCGGTAACCAGTTCTATTTT_TRAJ49:P190604_TRBV12-3_TGTGCCAGCAGTCAACGTCGCTCCTACGAGCAGTACTTC_TRBJ2-7	TRAC	TRAV13-2	TRAJ49	TGTGCAGAGACCCCCCCCACCGGTAACCAGTTCTATTTT	TRAC	TRBV12-3	TRBJ2-7	TGTGCCAGCAGTCAACGTCGCTCCTACGAGCAGTACTTC	1	Blood	9786	FALSE	FALSE	FALSE
AAGGAGCTCCATTCTA-1-P190604_Blood_1	clone_P190604:10164:1	P190604	P190604_TRAV21_TGTGCTGTGGAGGGGGGAGGTAGCAACTATAAACTGACATTT_TRAJ53:P190604_TRBV24-1_TGTGCCACCAGTGTTTGGACTAGTCCAGATACGCAGTATTTT_TRBJ2-3	TRAC	TRAV21	TRAJ53	TGTGCTGTGGAGGGGGGAGGTAGCAACTATAAACTGACATTT	TRAC	TRBV24-1	TRBJ2-3	TGTGCCACCAGTGTTTGGACTAGTCCAGATACGCAGTATTTT	1	Blood	10164	FALSE	FALSE	FALSE
AAGGTTCAGAGTACAT-1-P190604_Blood_1	clone_P190604:10184:1	P190604	P190604_TRAV22_TGTGCTGCTTTTTCTAACTTTGGAAATGAGAAATTAACCTTT_TRAJ48:P190604_TRBV6-6_TGTGCCAGCAGCCCCAAATGGTTCAATCAGCCCCAGCATTTT_TRBJ1-5	TRAC	TRAV22	TRAJ48	TGTGCTGCTTTTTCTAACTTTGGAAATGAGAAATTAACCTTT	TRAC	TRBV6-6	TRBJ1-5	TGTGCCAGCAGCCCCAAATGGTTCAATCAGCCCCAGCATTTT	1	Blood	10184	FALSE	FALSE	FALSE
AAGGTTCGTCAGAAGC-1-P190604_Blood_1	clone_P190604:9926:1	P190604	P190604_TRAV17_TGTGCTACGGACGGCAATGACATGCGCTTT_TRAJ43:P190604_TRBV7-8_TGTGCCAGCTACAGTGGTGGGGCCAACGTCCTGACTTTC_TRBJ2-6	TRAC	TRAV17	TRAJ43	TGTGCTACGGACGGCAATGACATGCGCTTT	TRAC	TRBV7-8	TRBJ2-6	TGTGCCAGCTACAGTGGTGGGGCCAACGTCCTGACTTTC	1	Blood	9926	FALSE	FALSE	FALSE
AAGTCTGGTAACGACG-1-P190604_Blood_1	clone_P190604:9620:4	P190604	P190604_TRAV12-2_TGTGCCGTGAATCGGAACTTTGGAAATGAGAAATTAACCTTT_TRAJ48:P190604_TRBV2_TGTGCCAGCATAAGATTCGTTTACGAGCAGTACTTC_TRBJ2-7	TRAC	TRAV12-2	TRAJ48	TGTGCCGTGAATCGGAACTTTGGAAATGAGAAATTAACCTTT	TRAC	TRBV2	TRBJ2-7	TGTGCCAGCATAAGATTCGTTTACGAGCAGTACTTC	4	Blood	9620	TRUE	FALSE	FALSE
AAGTCTGTCGCCAGCA-1-P190604_Blood_1	clone_P190604:10535:1	P190604	P190604_TRAV3_TGTGCTGTGAGAGTTATATCTAACTTTGGAAATGAGAAATTAACCTTT_TRAJ48:P190604_TRBV30_TGTGCCTGGAGCCTGCTCGGGACTATCCTAGGGGGTGAGCAGTTCTTC_TRBJ2-1	TRAC	TRAV3	TRAJ48	TGTGCTGTGAGAGTTATATCTAACTTTGGAAATGAGAAATTAACCTTT	TRAC	TRBV30	TRBJ2-1	TGTGCCTGGAGCCTGCTCGGGACTATCCTAGGGGGTGAGCAGTTCTTC	1	Blood	10535	FALSE	FALSE	FALSE
AATCCAGGTAAGTGGC-1-P190604_Blood_1	clone_P190604:9707:1	P190604	P190604_TRAV13-1_TGTGCAGCAAGTAAAAGTGATGACATGCGCTTT_TRAJ43:P190604_TRBV18_TGTGCCAGCTCATCTCAGCAGGGTAGCACTGAAGCTTTCTTT_TRBJ1-1	TRAC	TRAV13-1	TRAJ43	TGTGCAGCAAGTAAAAGTGATGACATGCGCTTT	TRAC	TRBV18	TRBJ1-1	TGTGCCAGCTCATCTCAGCAGGGTAGCACTGAAGCTTTCTTT	1	Blood	9707	FALSE	FALSE	FALSE
AATCCAGGTCCAAGTT-1-P190604_Blood_1	clone_P190604:10818:1	P190604	P190604_TRAV8-2_TGTGTTGTGAGTGGTATGGATAGCAGCTATAAATTGATCTTC_TRAJ12:P190604_TRBV11-2_TGTGCCAGCAGCCGTACAGGGGAGGTGTTCTTC_TRBJ2-1	TRAC	TRAV8-2	TRAJ12	TGTGTTGTGAGTGGTATGGATAGCAGCTATAAATTGATCTTC	TRAC	TRBV11-2	TRBJ2-1	TGTGCCAGCAGCCGTACAGGGGAGGTGTTCTTC	1	Blood	10818	FALSE	FALSE	FALSE
AATCGGTGTAAGAGGA-1-P190604_Blood_1	clone_P190604:9970:1	P190604	P190604_TRAV19_TGTGCTCTGAGAGGAGATGACAAGATCATCTTT_TRAJ30:P190604_TRBV5-6_TGTGCCAGCAGCTTGTCTCCGGGACCGTACTCCTACGAGCAGTACTTC_TRBJ2-7	TRAC	TRAV19	TRAJ30	TGTGCTCTGAGAGGAGATGACAAGATCATCTTT	TRAC	TRBV5-6	TRBJ2-7	TGTGCCAGCAGCTTGTCTCCGGGACCGTACTCCTACGAGCAGTACTTC	1	Blood	9970	FALSE	FALSE	FALSE
ACACCCTGTCCATGAT-1-P190604_Blood_1	clone_P190604:10814:7	P190604	P190604_TRAV8-2_TGTGTTGTGAGTGATGGTTATGGTGGTGCTACAAACAAGCTCATCTTT_TRAJ32:P190604_TRBV5-8_TGTGCCAGCAGCGTGGGGCCTGGGCGGGAGGGCGAAGAGACCCAGTACTTC_TRBJ2-5	TRAC	TRAV8-2	TRAJ32	TGTGTTGTGAGTGATGGTTATGGTGGTGCTACAAACAAGCTCATCTTT	TRAC	TRBV5-8	TRBJ2-5	TGTGCCAGCAGCGTGGGGCCTGGGCGGGAGGGCGAAGAGACCCAGTACTTC	7	Blood	10814	TRUE	FALSE	FALSE
ACACCGGAGCGTCAAG-1-P190604_Blood_1	clone_P190604:11010:1	P190604	P190604_TRAV9-2_TGTGCTCTGAGTGATAGGATCTTCAACAAATTTTACTTT_TRAJ21:P190604_TRBV9_TGTGCCAGCAGCGTCTCTGGTGCAGGGGGAGAGACCCAGTACTTC_TRBJ2-5	TRAC	TRAV9-2	TRAJ21	TGTGCTCTGAGTGATAGGATCTTCAACAAATTTTACTTT	TRAC	TRBV9	TRBJ2-5	TGTGCCAGCAGCGTCTCTGGTGCAGGGGGAGAGACCCAGTACTTC	1	Blood	11010	FALSE	FALSE	FALSE
ACACTGAGTTGCGTTA-1-P190604_Blood_1	clone_P190604:9736:1	P190604	P190604_TRAV13-1_TGTGCAGCAAGTCTCACCAATGCAGGCAAATCAACCTTT_TRAJ27:P190604_TRBV20-1_TGCAGTGCTCCCCGGACAGGGAAGGTAGCAGCTTTCTTT_TRBJ1-1	TRAC	TRAV13-1	TRAJ27	TGTGCAGCAAGTCTCACCAATGCAGGCAAATCAACCTTT	TRAC	TRBV20-1	TRBJ1-1	TGCAGTGCTCCCCGGACAGGGAAGGTAGCAGCTTTCTTT	1	Blood	9736	FALSE	FALSE	FALSE
ACAGCCGCATGTCGAT-1-P190604_Blood_1	clone_P190604:9415:1	P190604	P190604_TRAV1-2_TGTGCTGTGAGATCGGTTAACGACTACAAGCTCAGCTTT_TRAJ20:P190604_TRBV9_TGTGCCAGCAGTGATTCCGGGCTTGAGAGTAAGGAGCAGTTCTTC_TRBJ2-1	TRAC	TRAV1-2	TRAJ20	TGTGCTGTGAGATCGGTTAACGACTACAAGCTCAGCTTT	TRAC	TRBV9	TRBJ2-1	TGTGCCAGCAGTGATTCCGGGCTTGAGAGTAAGGAGCAGTTCTTC	1	Blood	9415	FALSE	TRUE	FALSE
ACATGGTAGCACCGTC-1-P190604_Blood_1	clone_P190604:10115:29	P190604	P190604_TRAV21_TGTGCTGCGGGGATGGATAGCAACTATCAGTTAATCTGG_TRAJ33:P190604_TRBV27_TGTGCCAGCAGTCCTCGGACAGGGACCGGCGAGCAGTACTTC_TRBJ2-7	TRAC	TRAV21	TRAJ33	TGTGCTGCGGGGATGGATAGCAACTATCAGTTAATCTGG	TRAC	TRBV27	TRBJ2-7	TGTGCCAGCAGTCCTCGGACAGGGACCGGCGAGCAGTACTTC	29	Blood	10115	TRUE	FALSE	FALSE
ACCAGTAGTGATGTGG-1-P190604_Blood_1	clone_P190604:10468:1	P190604	P190604_TRAV29/DV5_TGTGCAGCGTATTCAGGAGGAGGTGCTGACGGACTCACCTTT_TRAJ45:P190604_TRBV6-5_TGTGCCAGCAGTTACACTCGACAGAACACAGATACGCAGTATTTT_TRBJ2-3	TRAC	TRAV29/DV5	TRAJ45	TGTGCAGCGTATTCAGGAGGAGGTGCTGACGGACTCACCTTT	TRAC	TRBV6-5	TRBJ2-3	TGTGCCAGCAGTTACACTCGACAGAACACAGATACGCAGTATTTT	1	Blood	10468	FALSE	FALSE	FALSE
ACCGTAATCGGTTCGG-1-P190604_Blood_1	clone_P190604:10064:1	P190604	P190604_TRAV2_TGTGCTGTTTATGCTGGCAACAACCGTAAGCTGATTTGG_TRAJ38:P190604_TRBV19_TGTGCCAGTAGCACCCTAGACGGGACAGCTGAGAATTCACCCCTCCACTTT_TRBJ1-6	TRAC	TRAV2	TRAJ38	TGTGCTGTTTATGCTGGCAACAACCGTAAGCTGATTTGG	TRAC	TRBV19	TRBJ1-6	TGTGCCAGTAGCACCCTAGACGGGACAGCTGAGAATTCACCCCTCCACTTT	1	Blood	10064	FALSE	FALSE	FALSE
ACCTTTAGTGAGTGAC-1-P190604_Blood_1	clone_P190604:9511:1	P190604	P190604_TRAV12-1_TGTGTGGTGAACAAAGGAAACTATGGTCAGAATTTTGTCTTT_TRAJ26:P190604_TRBV2_TGTGCCAGCAGTGGGACAGCCGCCGGCGAGCAGTACTTC_TRBJ2-7	TRAC	TRAV12-1	TRAJ26	TGTGTGGTGAACAAAGGAAACTATGGTCAGAATTTTGTCTTT	TRAC	TRBV2	TRBJ2-7	TGTGCCAGCAGTGGGACAGCCGCCGGCGAGCAGTACTTC	1	Blood	9511	FALSE	FALSE	FALSE
ACGAGCCGTTACAGAA-1-P190604_Blood_1	clone_P190604:10632:1	P190604	P190604_TRAV38-2/DV8_TGTGCTTATAGGAGCGCGGCAGGAGGAGGTGCTGACGGACTCACCTTT_TRAJ45:P190604_TRBV6-6_TGTGCCAGCAGTTACGCGACTAGCGGTCACAATGAGCAGTTCTTC_TRBJ2-1	TRAC	TRAV38-2/DV8	TRAJ45	TGTGCTTATAGGAGCGCGGCAGGAGGAGGTGCTGACGGACTCACCTTT	TRAC	TRBV6-6	TRBJ2-1	TGTGCCAGCAGTTACGCGACTAGCGGTCACAATGAGCAGTTCTTC	1	Blood	10632	FALSE	FALSE	FALSE
ACGAGGACAAGGACTG-1-P190604_Blood_1	clone_P190604:10953:1	P190604	P190604_TRAV8-6_TGTGCTGTGAGTGATCGGTGGGGAGCCCAGAAGCTGGTATTT_TRAJ54:P190604_TRBV20-1_TGCAGTAGACCAGGACCCCTGGTAGATACGCAGTATTTT_TRBJ2-3	TRAC	TRAV8-6	TRAJ54	TGTGCTGTGAGTGATCGGTGGGGAGCCCAGAAGCTGGTATTT	TRAC	TRBV20-1	TRBJ2-3	TGCAGTAGACCAGGACCCCTGGTAGATACGCAGTATTTT	1	Blood	10953	FALSE	FALSE	FALSE
ACGATGTAGCGTCAAG-1-P190604_Blood_1	clone_P190604:9559:1	P190604	P190604_TRAV12-1_TGTGTGGTGTATACTGGAGGCTTCAAAACTATCTTT_TRAJ9:P190604_TRBV6-2_TGTGCCAGCAGTTACACCTCCCGCACAGATACGCAGTATTTT_TRBJ2-3	TRAC	TRAV12-1	TRAJ9	TGTGTGGTGTATACTGGAGGCTTCAAAACTATCTTT	TRAC	TRBV6-2	TRBJ2-3	TGTGCCAGCAGTTACACCTCCCGCACAGATACGCAGTATTTT	1	Blood	9559	FALSE	FALSE	FALSE
ACGGAGAGTACGACCC-1-P190604_Blood_1	clone_P190604:10913:1	P190604	P190604_TRAV8-4_TGTGCTGTGAGTGATAACACCAATGCAGGCAAATCAACCTTT_TRAJ27:P190604_TRBV20-1_TGCAGTGCTTTCCACGGGGGTACAGATACGCAGTATTTT_TRBJ2-3	TRAC	TRAV8-4	TRAJ27	TGTGCTGTGAGTGATAACACCAATGCAGGCAAATCAACCTTT	TRAC	TRBV20-1	TRBJ2-3	TGCAGTGCTTTCCACGGGGGTACAGATACGCAGTATTTT	1	Blood	10913	FALSE	FALSE	FALSE
ACGGAGATCACCCGAG-1-P190604_Blood_1	clone_P190604:9577:1	P190604	P190604_TRAV12-2_TGTGCCGGGGTTAACACCGACAAGCTCATCTTT_TRAJ34:P190604_TRBV4-1_TGCGCCAGCAGCCAAGGTTCCAGGGAGGGCTACGAGCAGTACTTC_TRBJ2-7	TRAC	TRAV12-2	TRAJ34	TGTGCCGGGGTTAACACCGACAAGCTCATCTTT	TRAC	TRBV4-1	TRBJ2-7	TGCGCCAGCAGCCAAGGTTCCAGGGAGGGCTACGAGCAGTACTTC	1	Blood	9577	FALSE	FALSE	FALSE
ACGGAGATCTGAAAGA-1-P190604_Blood_1	clone_P190604:10209:1	P190604	P190604_TRAV23/DV6_TGTGCAGCAAGCAGGCAGGGAGGAGGAAACAAACTCACCTTT_TRAJ10:P190604_TRBV18_TGTGCCAGCTCACCACCTAACTTAAACTACGAGCAGTACTTC_TRBJ2-7	TRAC	TRAV23/DV6	TRAJ10	TGTGCAGCAAGCAGGCAGGGAGGAGGAAACAAACTCACCTTT	TRAC	TRBV18	TRBJ2-7	TGTGCCAGCTCACCACCTAACTTAAACTACGAGCAGTACTTC	1	Blood	10209	FALSE	FALSE	FALSE
ACGGCCACAAATCCGT-1-P190604_Blood_1	clone_P190604:10421:60	P190604	P190604_TRAV29/DV5_TGTGCAGCAAGCGCCCATAGTGGAGGTAGCAACTATAAACTGACATTT_TRAJ53:P190604_TRBV7-9_TGTGCCACCAGATTAGGGTACGAGCAGTACTTC_TRBJ2-7	TRAC	TRAV29/DV5	TRAJ53	TGTGCAGCAAGCGCCCATAGTGGAGGTAGCAACTATAAACTGACATTT	TRAC	TRBV7-9	TRBJ2-7	TGTGCCACCAGATTAGGGTACGAGCAGTACTTC	60	Blood	10421	TRUE	FALSE	FALSE
ACGGCCATCGTCACGG-1-P190604_Blood_1	clone_P190604:9963:1	P190604	P190604_TRAV19_TGTGCTCTCTCCCTTAATGAGAAATTAACCTTT_TRAJ48:P190604_TRBV5-4_TGTGCCAGCAGCCGCCTAGCAACTAGCGGCCAAGAGACCCAGTACTTC_TRBJ2-5	TRAC	TRAV19	TRAJ48	TGTGCTCTCTCCCTTAATGAGAAATTAACCTTT	TRAC	TRBV5-4	TRBJ2-5	TGTGCCAGCAGCCGCCTAGCAACTAGCGGCCAAGAGACCCAGTACTTC	1	Blood	9963	FALSE	FALSE	FALSE
ACGGGCTCACCAGATT-1-P190604_Blood_1	clone_P190604:10314:2	P190604	P190604_TRAV26-1_TGCATCGTCAGAGTCGCTCACAGAGGCTCAACCCTGGGGAGGCTATACTTT_TRAJ18:P190604_TRBV4-2_TGTGCCAGCAGCCAAGATTGGGCGGAAAGCTCCTACAATGAGCAGTTCTTC_TRBJ2-1	TRAC	TRAV26-1	TRAJ18	TGCATCGTCAGAGTCGCTCACAGAGGCTCAACCCTGGGGAGGCTATACTTT	TRAC	TRBV4-2	TRBJ2-1	TGTGCCAGCAGCCAAGATTGGGCGGAAAGCTCCTACAATGAGCAGTTCTTC	2	Blood	10314	TRUE	FALSE	FALSE
ACGGGCTGTAAATGTG-1-P190604_Blood_1	clone_P190604:10905:1	P190604	P190604_TRAV8-4_TGTGCTGTGAGTGAAGATGCTGGTGGTACTAGCTATGGAAAGCTGACATTT_TRAJ52:P190604_TRBV10-3_TGTGCCACCAGACTAGCGGGAACCTACGAGCAGTACTTC_TRBJ2-7	TRAC	TRAV8-4	TRAJ52	TGTGCTGTGAGTGAAGATGCTGGTGGTACTAGCTATGGAAAGCTGACATTT	TRAC	TRBV10-3	TRBJ2-7	TGTGCCACCAGACTAGCGGGAACCTACGAGCAGTACTTC	1	Blood	10905	FALSE	FALSE	FALSE
ACGGGTCGTCTCGTTC-1-P190604_Blood_1	clone_P190604:10631:1	P190604	P190604_TRAV38-2/DV8_TGTGCTTATAGGAGCGCCGGATCTGAAAAGCTGGTCTTT_TRAJ57:P190604_TRBV5-1_TGCGCCAGCAGCTTCGCCTCAGGACTCACAGATACGCAGTATTTT_TRBJ2-3	TRAC	TRAV38-2/DV8	TRAJ57	TGTGCTTATAGGAGCGCCGGATCTGAAAAGCTGGTCTTT	TRAC	TRBV5-1	TRBJ2-3	TGCGCCAGCAGCTTCGCCTCAGGACTCACAGATACGCAGTATTTT	1	Blood	10631	FALSE	FALSE	FALSE
ACGTCAACAGCGTAAG-1-P190604_Blood_1	clone_P190604:10115:29	P190604	P190604_TRAV21_TGTGCTGCGGGGATGGATAGCAACTATCAGTTAATCTGG_TRAJ33:P190604_TRBV27_TGTGCCAGCAGTCCTCGGACAGGGACCGGCGAGCAGTACTTC_TRBJ2-7	TRAC	TRAV21	TRAJ33	TGTGCTGCGGGGATGGATAGCAACTATCAGTTAATCTGG	TRAC	TRBV27	TRBJ2-7	TGTGCCAGCAGTCCTCGGACAGGGACCGGCGAGCAGTACTTC	29	Blood	10115	TRUE	FALSE	FALSE
ACTATCTTCTCAAGTG-1-P190604_Blood_1	clone_P190604:9347:1	P190604	P190604_TRAV1-2_TGTGCTGTCCATTCAGGAGGAGGTGCTGACGGACTCACCTTT_TRAJ45:P190604_TRBV6-6_TGTGCCAGCAGTATACTAGATAGCCAAGAGACCCAGTACTTC_TRBJ2-5	TRAC	TRAV1-2	TRAJ45	TGTGCTGTCCATTCAGGAGGAGGTGCTGACGGACTCACCTTT	TRAC	TRBV6-6	TRBJ2-5	TGTGCCAGCAGTATACTAGATAGCCAAGAGACCCAGTACTTC	1	Blood	9347	FALSE	FALSE	FALSE
ACTGAACAGAGTAATC-1-P190604_Blood_1	clone_P190604:10697:1	P190604	P190604_TRAV4_TGCCTCGTGGTGCCTGGTTCTGCAAGGCAACTGACCTTT_TRAJ22:P190604_TRBV2_TGTGCCAGCAGTGAAGGGGGGGGACTAGCGGGACGCTACGAGCAGTACTTC_TRBJ2-7	TRAC	TRAV4	TRAJ22	TGCCTCGTGGTGCCTGGTTCTGCAAGGCAACTGACCTTT	TRAC	TRBV2	TRBJ2-7	TGTGCCAGCAGTGAAGGGGGGGGACTAGCGGGACGCTACGAGCAGTACTTC	1	Blood	10697	FALSE	FALSE	FALSE
ACTGAACTCTTATCTG-1-P190604_Blood_1	clone_P190604:9934:1	P190604	P190604_TRAV17_TGTGCTACGGATAGTATGTATTCAGGAGGAGGTGCTGACGGACTCACCTTT_TRAJ45:P190604_TRBV28_TGTGCCAGCAGTTTATCCTTAAGTCTTTCACCCCTCCACTTT_TRBJ1-6	TRAC	TRAV17	TRAJ45	TGTGCTACGGATAGTATGTATTCAGGAGGAGGTGCTGACGGACTCACCTTT	TRAC	TRBV28	TRBJ1-6	TGTGCCAGCAGTTTATCCTTAAGTCTTTCACCCCTCCACTTT	1	Blood	9934	FALSE	FALSE	FALSE
ACTGAGTTCTAACCGA-1-P190604_Blood_1	clone_P190604:10167:1	P190604	P190604_TRAV21_TGTGCTGTGGCTGGAGCCAATAGTAAGCTGACATTT_TRAJ56:P190604_TRBV11-2_TGTGCCAGCAGCTCCTCGGGAGTTTACGACGAGCAGTACTTC_TRBJ2-7	TRAC	TRAV21	TRAJ56	TGTGCTGTGGCTGGAGCCAATAGTAAGCTGACATTT	TRAC	TRBV11-2	TRBJ2-7	TGTGCCAGCAGCTCCTCGGGAGTTTACGACGAGCAGTACTTC	1	Blood	10167	FALSE	FALSE	FALSE
ACTGCTCAGATAGGAG-1-P190604_Blood_1	clone_P190604:10578:1	P190604	P190604_TRAV35_TGTGCTGGGCAGCTCGTACGATCGCGTAGTGGCTCTAGCAACACAGGCAAACTAATCTTT_TRAJ37:P190604_TRBV12-3_TGTGCCAGCAGCCCTAGCGGGTCGGGCACAGATACGCAGTATTTT_TRBJ2-3	TRAC	TRAV35	TRAJ37	TGTGCTGGGCAGCTCGTACGATCGCGTAGTGGCTCTAGCAACACAGGCAAACTAATCTTT	TRAC	TRBV12-3	TRBJ2-3	TGTGCCAGCAGCCCTAGCGGGTCGGGCACAGATACGCAGTATTTT	1	Blood	10578	FALSE	FALSE	FALSE
ACTGCTCTCCTGCTTG-1-P190604_Blood_1	clone_P190604:9602:5	P190604	P190604_TRAV12-2_TGTGCCGTGAACCTCTTCCTTTATGGTGGTGCTACAAACAAGCTCATCTTT_TRAJ32:P190604_TRBV6-2_TGTGCCAGCAGTTACATACCCAGGGAAACCTACGAGCAGTACTTC_TRBJ2-7	TRAC	TRAV12-2	TRAJ32	TGTGCCGTGAACCTCTTCCTTTATGGTGGTGCTACAAACAAGCTCATCTTT	TRAC	TRBV6-2	TRBJ2-7	TGTGCCAGCAGTTACATACCCAGGGAAACCTACGAGCAGTACTTC	5	Blood	9602	TRUE	FALSE	FALSE
ACTGTCCCAATGGATA-1-P190604_Blood_1	clone_P190604:9582:1	P190604	P190604_TRAV12-2_TGTGCCGTCTATTCCGGGTATGCACTCAACTTC_TRAJ41:P190604_TRBV7-9_TGTGCCAGCAGCTTAGCGGGGGCTTCGGACTATGGCTACACCTTC_TRBJ1-2	TRAC	TRAV12-2	TRAJ41	TGTGCCGTCTATTCCGGGTATGCACTCAACTTC	TRAC	TRBV7-9	TRBJ1-2	TGTGCCAGCAGCTTAGCGGGGGCTTCGGACTATGGCTACACCTTC	1	Blood	9582	FALSE	FALSE	FALSE
ACTGTCCTCGCTTAGA-1-P190604_Blood_1	clone_P190604:10047:1	P190604	P190604_TRAV2_TGTGCTGTGGAGGATAATATGGGCAACACAGGCAAACTAATCTTT_TRAJ37:P190604_TRBV29-1_TGCAGCGTTGTGACAGGCGGGAGAGGCGCCTACAATGAGCAGTTCTTC_TRBJ2-1	TRAC	TRAV2	TRAJ37	TGTGCTGTGGAGGATAATATGGGCAACACAGGCAAACTAATCTTT	TRAC	TRBV29-1	TRBJ2-1	TGCAGCGTTGTGACAGGCGGGAGAGGCGCCTACAATGAGCAGTTCTTC	1	Blood	10047	FALSE	FALSE	FALSE
ACTTTCATCCGCATCT-1-P190604_Blood_1	clone_P190604:10008:1	P190604	P190604_TRAV19_TGTGCTCTGAGTGAGGGACCGATGGATAGCAGCTATAAATTGATCTTC_TRAJ12:P190604_TRBV27_TGTGCCAGCAGTCCGGGGCGCGGGGCTGGCTATGGCTACACCTTC_TRBJ1-2	TRAC	TRAV19	TRAJ12	TGTGCTCTGAGTGAGGGACCGATGGATAGCAGCTATAAATTGATCTTC	TRAC	TRBV27	TRBJ1-2	TGTGCCAGCAGTCCGGGGCGCGGGGCTGGCTATGGCTACACCTTC	1	Blood	10008	FALSE	FALSE	FALSE
AGACGTTAGAGCAATT-1-P190604_Blood_1	clone_P190604:9546:1	P190604	P190604_TRAV12-1_TGTGTGGTGACTTTTTCTGGGGGTTACCAGAAAGTTACCTTT_TRAJ13:P190604_TRBV9_TGTGCCAGCAGCGCCAGACCGGGCCCCTCCCAAGAGACCCAGTACTTC_TRBJ2-5	TRAC	TRAV12-1	TRAJ13	TGTGTGGTGACTTTTTCTGGGGGTTACCAGAAAGTTACCTTT	TRAC	TRBV9	TRBJ2-5	TGTGCCAGCAGCGCCAGACCGGGCCCCTCCCAAGAGACCCAGTACTTC	1	Blood	9546	FALSE	FALSE	FALSE
AGACGTTAGGGATGGG-1-P190604_Blood_1	clone_P190604:10611:1	P190604	P190604_TRAV38-1_TGTGCTTTCATGAAGCCGCTGAATTATGGAGGAAGCCAAGGAAATCTCATCTTT_TRAJ42:P190604_TRBV28_TGTGCCAGCAGTTTATCCTCCTCAGGGAACTATGGCTACACCTTC_TRBJ1-2	TRAC	TRAV38-1	TRAJ42	TGTGCTTTCATGAAGCCGCTGAATTATGGAGGAAGCCAAGGAAATCTCATCTTT	TRAC	TRBV28	TRBJ1-2	TGTGCCAGCAGTTTATCCTCCTCAGGGAACTATGGCTACACCTTC	1	Blood	10611	FALSE	FALSE	FALSE
AGACGTTCACGAGGTA-1-P190604_Blood_1	clone_P190604:9338:2	P190604	P190604_TRAV1-2_TGTGCTGGGACCTTTCGCGGAGGAAGCCAAGGAAATCTCATCTTT_TRAJ42:P190604_TRBV18_TGTGCCAGCTCACCGTCGACAGGGTACACTGAAGCTTTCTTT_TRBJ1-1	TRAC	TRAV1-2	TRAJ42	TGTGCTGGGACCTTTCGCGGAGGAAGCCAAGGAAATCTCATCTTT	TRAC	TRBV18	TRBJ1-1	TGTGCCAGCTCACCGTCGACAGGGTACACTGAAGCTTTCTTT	2	Blood	9338	TRUE	FALSE	FALSE
AGACGTTTCCCATTAT-1-P190604_Blood_1	clone_P190604:10650:1	P190604	P190604_TRAV38-2/DV8_TGTGCTTATGTACGAAGGGGAGCCCAGAAGCTGGTATTT_TRAJ54:P190604_TRBV11-3_TGTGCCAGCAGGGACCGGGGCACAGATACGCAGTATTTT_TRBJ2-3	TRAC	TRAV38-2/DV8	TRAJ54	TGTGCTTATGTACGAAGGGGAGCCCAGAAGCTGGTATTT	TRAC	TRBV11-3	TRBJ2-3	TGTGCCAGCAGGGACCGGGGCACAGATACGCAGTATTTT	1	Blood	10650	FALSE	FALSE	FALSE
AGACGTTTCTCTGCTG-1-P190604_Blood_1	clone_P190604:10137:1	P190604	P190604_TRAV21_TGTGCTGTGACAGTACTCACGGGAGGAGGAAACAAACTCACCTTT_TRAJ10:P190604_TRBV19_TGTGCCAGTAGTCCCTTCGGAGGCACCGGGGAGCTGTTTTTT_TRBJ2-2	TRAC	TRAV21	TRAJ10	TGTGCTGTGACAGTACTCACGGGAGGAGGAAACAAACTCACCTTT	TRAC	TRBV19	TRBJ2-2	TGTGCCAGTAGTCCCTTCGGAGGCACCGGGGAGCTGTTTTTT	1	Blood	10137	FALSE	FALSE	FALSE
AGAGCGAAGAGAACAG-1-P190604_Blood_1	clone_P190604:10222:26	P190604	P190604_TRAV23/DV6_TGTGCAGCAAGGGACACCGACAAGCTCATCTTT_TRAJ34:P190604_TRBV7-3_TGTGCCAGCAGCTTAAGACAGGGCGTGGAGGATACGCAGTATTTT_TRBJ2-3	TRAC	TRAV23/DV6	TRAJ34	TGTGCAGCAAGGGACACCGACAAGCTCATCTTT	TRAC	TRBV7-3	TRBJ2-3	TGTGCCAGCAGCTTAAGACAGGGCGTGGAGGATACGCAGTATTTT	26	Blood	10222	TRUE	FALSE	FALSE
AGAGCGAAGTAACCCT-1-P190604_Blood_1	clone_P190604:10083:1	P190604	P190604_TRAV20_TGTGCTGTGCAGGCCGAGGAGGGCTTTGGGAATGTGCTGCATTGC_TRAJ35:P190604_TRBV4-3_TGCGCCAGCAGCCAATTGGCAAGGCGGGGGGGTATCGGGGAGCTGTTTTTT_TRBJ2-2	TRAC	TRAV20	TRAJ35	TGTGCTGTGCAGGCCGAGGAGGGCTTTGGGAATGTGCTGCATTGC	TRAC	TRBV4-3	TRBJ2-2	TGCGCCAGCAGCCAATTGGCAAGGCGGGGGGGTATCGGGGAGCTGTTTTTT	1	Blood	10083	FALSE	FALSE	FALSE
AGAGCGAGTGACGGTA-1-P190604_Blood_1	clone_P190604:10163:12	P190604	P190604_TRAV21_TGTGCTGTGGAGGATAGCAACTATCAGTTAATCTGG_TRAJ33:P190604_TRBV5-1_TGCGCCAGCCGAGATACCATCGGGACAGACGACTATGGCTACACCTTC_TRBJ1-2	TRAC	TRAV21	TRAJ33	TGTGCTGTGGAGGATAGCAACTATCAGTTAATCTGG	TRAC	TRBV5-1	TRBJ1-2	TGCGCCAGCCGAGATACCATCGGGACAGACGACTATGGCTACACCTTC	12	Blood	10163	TRUE	FALSE	FALSE
AGAGCTTCAGACTCGC-1-P190604_Blood_1	clone_P190604:9679:1	P190604	P190604_TRAV12-3_TGTGCAATGAGCGTGTACAATAACAATGACATGCGCTTT_TRAJ43:P190604_TRBV28_TGTGCCAGCGGAGGGGACAGTAGCGGATCACGGGGCATTCAGTACTTC_TRBJ2-4	TRAC	TRAV12-3	TRAJ43	TGTGCAATGAGCGTGTACAATAACAATGACATGCGCTTT	TRAC	TRBV28	TRBJ2-4	TGTGCCAGCGGAGGGGACAGTAGCGGATCACGGGGCATTCAGTACTTC	1	Blood	9679	FALSE	FALSE	FALSE
AGAGTGGTCAGGCCCA-1-P190604_Blood_1	clone_P190604:10115:29	P190604	P190604_TRAV21_TGTGCTGCGGGGATGGATAGCAACTATCAGTTAATCTGG_TRAJ33:P190604_TRBV27_TGTGCCAGCAGTCCTCGGACAGGGACCGGCGAGCAGTACTTC_TRBJ2-7	TRAC	TRAV21	TRAJ33	TGTGCTGCGGGGATGGATAGCAACTATCAGTTAATCTGG	TRAC	TRBV27	TRBJ2-7	TGTGCCAGCAGTCCTCGGACAGGGACCGGCGAGCAGTACTTC	29	Blood	10115	TRUE	FALSE	FALSE
AGATCTGTCCTTTACA-1-P190604_Blood_1	clone_P190604:10976:2	P190604	P190604_TRAV9-2_TGTGCTCTCGGAATTTCTTCTGGTTCTGCAAGGCAACTGACCTTT_TRAJ22:P190604_TRBV5-1_TGCGCCAGCAGCGACCTAAGTGGCACAGATACGCAGTATTTT_TRBJ2-3	TRAC	TRAV9-2	TRAJ22	TGTGCTCTCGGAATTTCTTCTGGTTCTGCAAGGCAACTGACCTTT	TRAC	TRBV5-1	TRBJ2-3	TGCGCCAGCAGCGACCTAAGTGGCACAGATACGCAGTATTTT	2	Blood	10976	TRUE	FALSE	FALSE
AGCATACGTCTCCACT-1-P190604_Blood_1	clone_P190604:10421:60	P190604	P190604_TRAV29/DV5_TGTGCAGCAAGCGCCCATAGTGGAGGTAGCAACTATAAACTGACATTT_TRAJ53:P190604_TRBV7-9_TGTGCCACCAGATTAGGGTACGAGCAGTACTTC_TRBJ2-7	TRAC	TRAV29/DV5	TRAJ53	TGTGCAGCAAGCGCCCATAGTGGAGGTAGCAACTATAAACTGACATTT	TRAC	TRBV7-9	TRBJ2-7	TGTGCCACCAGATTAGGGTACGAGCAGTACTTC	60	Blood	10421	TRUE	FALSE	FALSE
AGCCTAAGTGACAAAT-1-P190604_Blood_1	clone_P190604:10140:1	P190604	P190604_TRAV21_TGTGCTGTGAGAAACACCGACAAGCTCATCTTT_TRAJ34:P190604_TRBV28_TGTGCCAGCAGTTCCCCCTCAGCGGGCGGTATTGATACGCAGTATTTT_TRBJ2-3	TRAC	TRAV21	TRAJ34	TGTGCTGTGAGAAACACCGACAAGCTCATCTTT	TRAC	TRBV28	TRBJ2-3	TGTGCCAGCAGTTCCCCCTCAGCGGGCGGTATTGATACGCAGTATTTT	1	Blood	10140	FALSE	FALSE	FALSE
AGCCTAATCTAGCACA-1-P190604_Blood_1	clone_P190604:9589:1	P190604	P190604_TRAV12-2_TGTGCCGTGAACAAGGGGGGAAGCCAAGGAAATCTCATCTTT_TRAJ42:P190604_TRBV5-6_TGTGCCAGCGAGGTTCCTTCCTACGAGCAGTACTTC_TRBJ2-7	TRAC	TRAV12-2	TRAJ42	TGTGCCGTGAACAAGGGGGGAAGCCAAGGAAATCTCATCTTT	TRAC	TRBV5-6	TRBJ2-7	TGTGCCAGCGAGGTTCCTTCCTACGAGCAGTACTTC	1	Blood	9589	FALSE	FALSE	FALSE
AGCGTATCACGGATAG-1-P190604_Blood_1	clone_P190604:10593:1	P190604	P190604_TRAV35_TGTGCTGGTCGGAATGCTGGCAACAACCGTAAGCTGATTTGG_TRAJ38:P190604_TRBV20-1_TGCAGTGCTTCCCCTGAGCTAGCGGGCCAAGAGACCCAGTACTTC_TRBJ2-5	TRAC	TRAV35	TRAJ38	TGTGCTGGTCGGAATGCTGGCAACAACCGTAAGCTGATTTGG	TRAC	TRBV20-1	TRBJ2-5	TGCAGTGCTTCCCCTGAGCTAGCGGGCCAAGAGACCCAGTACTTC	1	Blood	10593	FALSE	FALSE	FALSE
AGCGTATTCTCATTCA-1-P190604_Blood_1	clone_P190604:10276:1	P190604	P190604_TRAV25_TGTGCAGGGCGCAATGCTGGTGGTACTAGCTATGGAAAGCTGACATTT_TRAJ52:P190604_TRBV19_TGTGCCAGTAGTATTGACCGGGGGGACTTTTACAATGAGCAGTTCTTC_TRBJ2-1	TRAC	TRAV25	TRAJ52	TGTGCAGGGCGCAATGCTGGTGGTACTAGCTATGGAAAGCTGACATTT	TRAC	TRBV19	TRBJ2-1	TGTGCCAGTAGTATTGACCGGGGGGACTTTTACAATGAGCAGTTCTTC	1	Blood	10276	FALSE	FALSE	FALSE
AGCTCCTAGTCCATAC-1-P190604_Blood_1	clone_P190604:11038:1	P190604	P190604_TRAV9-2_TGTGCTCTGCTCCCTATAATTCAGGGAGCCCAGAAGCTGGTATTT_TRAJ54:P190604_TRBV7-9_TGTGCCAGCAGCTCCCTGGACAGAGCCCACGAGCAGTACTTC_TRBJ2-7	TRAC	TRAV9-2	TRAJ54	TGTGCTCTGCTCCCTATAATTCAGGGAGCCCAGAAGCTGGTATTT	TRAC	TRBV7-9	TRBJ2-7	TGTGCCAGCAGCTCCCTGGACAGAGCCCACGAGCAGTACTTC	1	Blood	11038	FALSE	FALSE	FALSE
AGCTCCTCAAGCCGTC-1-P190604_Blood_1	clone_P190604:9846:1	P190604	P190604_TRAV14/DV4_TGTGCAATGAGAGAGTTGACCTATGGGAACAACAGACTCGCTTTT_TRAJ7:P190604_TRBV2_TGTGCCAGCAGTGAAGTAGAGCGGGAGGTACTCACAGATACGCAGTATTTT_TRBJ2-3	TRAC	TRAV14/DV4	TRAJ7	TGTGCAATGAGAGAGTTGACCTATGGGAACAACAGACTCGCTTTT	TRAC	TRBV2	TRBJ2-3	TGTGCCAGCAGTGAAGTAGAGCGGGAGGTACTCACAGATACGCAGTATTTT	1	Blood	9846	FALSE	FALSE	FALSE
AGCTCCTTCGGCATCG-1-P190604_Blood_1	clone_P190604:10543:3	P190604	P190604_TRAV3_TGTGCTGTGAGGGCCCTATACTCTGGGGCTGGGAGTTACCAACTCACTTTC_TRAJ28:P190604_TRBV7-3_TGTGCCAGCAGCCTACAGCTGGACGAGTACAATGAGCAGTTCTTC_TRBJ2-1	TRAC	TRAV3	TRAJ28	TGTGCTGTGAGGGCCCTATACTCTGGGGCTGGGAGTTACCAACTCACTTTC	TRAC	TRBV7-3	TRBJ2-1	TGTGCCAGCAGCCTACAGCTGGACGAGTACAATGAGCAGTTCTTC	3	Blood	10543	TRUE	FALSE	FALSE
AGCTCTCTCGCAAACT-1-P190604_Blood_1	clone_P190604:10222:26	P190604	P190604_TRAV23/DV6_TGTGCAGCAAGGGACACCGACAAGCTCATCTTT_TRAJ34:P190604_TRBV7-3_TGTGCCAGCAGCTTAAGACAGGGCGTGGAGGATACGCAGTATTTT_TRBJ2-3	TRAC	TRAV23/DV6	TRAJ34	TGTGCAGCAAGGGACACCGACAAGCTCATCTTT	TRAC	TRBV7-3	TRBJ2-3	TGTGCCAGCAGCTTAAGACAGGGCGTGGAGGATACGCAGTATTTT	26	Blood	10222	TRUE	FALSE	FALSE
AGCTTGAGTCAACATC-1-P190604_Blood_1	clone_P190604:10432:1	P190604	P190604_TRAV29/DV5_TGTGCAGCAAGCGCGCGGAACACCGGTAACCAGTTCTATTTT_TRAJ49:P190604_TRBV3-1_TGTGCCAGCAGTCCGGATCTGAACACTGAAGCTTTCTTT_TRBJ1-1	TRAC	TRAV29/DV5	TRAJ49	TGTGCAGCAAGCGCGCGGAACACCGGTAACCAGTTCTATTTT	TRAC	TRBV3-1	TRBJ1-1	TGTGCCAGCAGTCCGGATCTGAACACTGAAGCTTTCTTT	1	Blood	10432	FALSE	FALSE	FALSE
AGCTTGAGTTGCGTTA-1-P190604_Blood_1	clone_P190604:9458:1	P190604	P190604_TRAV1-2_TGTGCTGTGCCAGAGGGAGGAGGAAACAAACTCACCTTT_TRAJ10:P190604_TRBV9_TGTGCCAGCAGCCAGGGACTAGCGGCCCTCTCTGGGGCCAACGTCCTGACTTTC_TRBJ2-6	TRAC	TRAV1-2	TRAJ10	TGTGCTGTGCCAGAGGGAGGAGGAAACAAACTCACCTTT	TRAC	TRBV9	TRBJ2-6	TGTGCCAGCAGCCAGGGACTAGCGGCCCTCTCTGGGGCCAACGTCCTGACTTTC	1	Blood	9458	FALSE	FALSE	FALSE
AGGCCACAGTCTCAAC-1-P190604_Blood_1	clone_P190604:10962:1	P190604	P190604_TRAV8-6_TGTGCTGTGAGTTGGGATGGCCAGAAGCTGCTCTTT_TRAJ16:P190604_TRBV28_TGTGCCAGCAGTCTCAGGGGGCGCGAGCAGTACTTC_TRBJ2-7	TRAC	TRAV8-6	TRAJ16	TGTGCTGTGAGTTGGGATGGCCAGAAGCTGCTCTTT	TRAC	TRBV28	TRBJ2-7	TGTGCCAGCAGTCTCAGGGGGCGCGAGCAGTACTTC	1	Blood	10962	FALSE	FALSE	FALSE
AGGGAGTTCACGGTTA-1-P190604_Blood_1	clone_P190604:10402:1	P190604	P190604_TRAV29/DV5_TGTGCAGCAACCTCTTATGGAGGAAGCCAAGGAAATCTCATCTTT_TRAJ42:P190604_TRBV7-9_TGTGCCAGCAGCCCTACACAGGGGATCTTAGAGGAGACCCAGTACTTC_TRBJ2-5	TRAC	TRAV29/DV5	TRAJ42	TGTGCAGCAACCTCTTATGGAGGAAGCCAAGGAAATCTCATCTTT	TRAC	TRBV7-9	TRBJ2-5	TGTGCCAGCAGCCCTACACAGGGGATCTTAGAGGAGACCCAGTACTTC	1	Blood	10402	FALSE	FALSE	FALSE
AGGGATGGTAGCGTCC-1-P190604_Blood_1	clone_P190604:10057:1	P190604	P190604_TRAV2_TGTGCTGTGGCTTCTAATACTGGAGGCTTCAAAACTATCTTT_TRAJ9:P190604_TRBV20-1_TGCAGTGCTAGACCGGGGATGGAAGAAGCTTTCTTT_TRBJ1-1	TRAC	TRAV2	TRAJ9	TGTGCTGTGGCTTCTAATACTGGAGGCTTCAAAACTATCTTT	TRAC	TRBV20-1	TRBJ1-1	TGCAGTGCTAGACCGGGGATGGAAGAAGCTTTCTTT	1	Blood	10057	FALSE	FALSE	FALSE
AGGGATGGTAGCTGCC-1-P190604_Blood_1	clone_P190604:10359:1	P190604	P190604_TRAV27_TGTGCAGGAAACGACTACAAGCTCAGCTTT_TRAJ20:P190604_TRBV18_TGTGCCAGCTCACCACCTACGGGAGAAAACATTCAGTACTTC_TRBJ2-4	TRAC	TRAV27	TRAJ20	TGTGCAGGAAACGACTACAAGCTCAGCTTT	TRAC	TRBV18	TRBJ2-4	TGTGCCAGCTCACCACCTACGGGAGAAAACATTCAGTACTTC	1	Blood	10359	FALSE	FALSE	FALSE
AGGTCATTCCGTCAAA-1-P190604_Blood_1	clone_P190604:10163:12	P190604	P190604_TRAV21_TGTGCTGTGGAGGATAGCAACTATCAGTTAATCTGG_TRAJ33:P190604_TRBV5-1_TGCGCCAGCCGAGATACCATCGGGACAGACGACTATGGCTACACCTTC_TRBJ1-2	TRAC	TRAV21	TRAJ33	TGTGCTGTGGAGGATAGCAACTATCAGTTAATCTGG	TRAC	TRBV5-1	TRBJ1-2	TGCGCCAGCCGAGATACCATCGGGACAGACGACTATGGCTACACCTTC	12	Blood	10163	TRUE	FALSE	FALSE
AGGTCATTCTTGACGA-1-P190604_Blood_1	clone_P190604:10692:1	P190604	P190604_TRAV4_TGCCTCGTGGGTGGGGGGACGGGCAGGAGAGCACTTACTTTT_TRAJ5:P190604_TRBV13_TGTGCCAGCAGCCACCGGACAGCCAGGCTCTCCTACGAGCAGTACTTC_TRBJ2-7	TRAC	TRAV4	TRAJ5	TGCCTCGTGGGTGGGGGGACGGGCAGGAGAGCACTTACTTTT	TRAC	TRBV13	TRBJ2-7	TGTGCCAGCAGCCACCGGACAGCCAGGCTCTCCTACGAGCAGTACTTC	1	Blood	10692	FALSE	FALSE	FALSE
AGGTCCGAGATAGTCA-1-P190604_Blood_1	clone_P190604:10608:1	P190604	P190604_TRAV38-1_TGTGCTTTCATGAAGCAATCTGGAGCCAATAGTAAGCTGACATTT_TRAJ56:P190604_TRBV10-3_TGTGCCACTGAAGACCTGGACAGGGGGGAAACCCACCCCTACGAGCAGTACTTC_TRBJ2-7	TRAC	TRAV38-1	TRAJ56	TGTGCTTTCATGAAGCAATCTGGAGCCAATAGTAAGCTGACATTT	TRAC	TRBV10-3	TRBJ2-7	TGTGCCACTGAAGACCTGGACAGGGGGGAAACCCACCCCTACGAGCAGTACTTC	1	Blood	10608	FALSE	FALSE	FALSE
AGTAGTCAGACAAGCC-1-P190604_Blood_1	clone_P190604:9699:1	P190604	P190604_TRAV13-1_TGTGCAGCAACCGCCTACAATAACAATGACATGCGCTTT_TRAJ43:P190604_TRBV11-2_TGTGCCAGCAGCTTGATAAGTGCGGGACCCCCCGCAGATACGCAGTATTTT_TRBJ2-3	TRAC	TRAV13-1	TRAJ43	TGTGCAGCAACCGCCTACAATAACAATGACATGCGCTTT	TRAC	TRBV11-2	TRBJ2-3	TGTGCCAGCAGCTTGATAAGTGCGGGACCCCCCGCAGATACGCAGTATTTT	1	Blood	9699	FALSE	FALSE	FALSE
AGTAGTCGTAGGAGTC-1-P190604_Blood_1	clone_P190604:9701:1	P190604	P190604_TRAV13-1_TGTGCAGCAACCTTCGTAGCAGGAGGAGGTGCTGACGGACTCACCTTT_TRAJ45:P190604_TRBV20-1_TGCAGTGCTAGACGGCCGACAGGGAACGAGCAGTACTTC_TRBJ2-7	TRAC	TRAV13-1	TRAJ45	TGTGCAGCAACCTTCGTAGCAGGAGGAGGTGCTGACGGACTCACCTTT	TRAC	TRBV20-1	TRBJ2-7	TGCAGTGCTAGACGGCCGACAGGGAACGAGCAGTACTTC	1	Blood	9701	FALSE	FALSE	FALSE
AGTGAGGTCTTCGAGA-1-P190604_Blood_1	clone_P190604:10970:1	P190604	P190604_TRAV9-2_TGTGCTCCGAGGGCCCACACCGGTAACCAGTTCTATTTT_TRAJ49:P190604_TRBV12-4_TGTGCCAGCAGTCGGACGGGAGATAATTCACCCCTCCACTTT_TRBJ1-6	TRAC	TRAV9-2	TRAJ49	TGTGCTCCGAGGGCCCACACCGGTAACCAGTTCTATTTT	TRAC	TRBV12-4	TRBJ1-6	TGTGCCAGCAGTCGGACGGGAGATAATTCACCCCTCCACTTT	1	Blood	10970	FALSE	FALSE	FALSE
AGTGGGACACAACGTT-1-P190604_Blood_1	clone_P190604:9626:1	P190604	P190604_TRAV12-2_TGTGCCGTGAGACCGGGCTCTAGCAACACAGGCAAACTAATCTTT_TRAJ37:P190604_TRBV6-5_TGTGCCAGCAGTTACTCCAGGGGCGGGCAGCCCCAGCATTTT_TRBJ1-5	TRAC	TRAV12-2	TRAJ37	TGTGCCGTGAGACCGGGCTCTAGCAACACAGGCAAACTAATCTTT	TRAC	TRBV6-5	TRBJ1-5	TGTGCCAGCAGTTACTCCAGGGGCGGGCAGCCCCAGCATTTT	1	Blood	9626	FALSE	FALSE	FALSE
AGTGGGACAGCCACCA-1-P190604_Blood_1	clone_P190604:10616:1	P190604	P190604_TRAV38-1_TGTGCTTTCATGTCGTATTCTGGGGGTTACCAGAAAGTTACCTTT_TRAJ13:P190604_TRBV7-3_TGTGCCAGCAGCTTATTAGCGGGAGAAACAGATACGCAGTATTTT_TRBJ2-3	TRAC	TRAV38-1	TRAJ13	TGTGCTTTCATGTCGTATTCTGGGGGTTACCAGAAAGTTACCTTT	TRAC	TRBV7-3	TRBJ2-3	TGTGCCAGCAGCTTATTAGCGGGAGAAACAGATACGCAGTATTTT	1	Blood	10616	FALSE	FALSE	FALSE
AGTTGGTGTTAAGAAC-1-P190604_Blood_1	clone_P190604:10815:1	P190604	P190604_TRAV8-2_TGTGTTGTGAGTGCCGCATCAGGAGGAAGCTACATACCTACATTT_TRAJ6:P190604_TRBV28_TGTGCCAGCAGTTTAGGAGGGGGCTTTGGCGATCAGCCCCAGCATTTT_TRBJ1-5	TRAC	TRAV8-2	TRAJ6	TGTGTTGTGAGTGCCGCATCAGGAGGAAGCTACATACCTACATTT	TRAC	TRBV28	TRBJ1-5	TGTGCCAGCAGTTTAGGAGGGGGCTTTGGCGATCAGCCCCAGCATTTT	1	Blood	10815	FALSE	FALSE	FALSE
AGTTGGTTCGAATGCT-1-P190604_Blood_1	clone_P190604:10421:60	P190604	P190604_TRAV29/DV5_TGTGCAGCAAGCGCCCATAGTGGAGGTAGCAACTATAAACTGACATTT_TRAJ53:P190604_TRBV7-9_TGTGCCACCAGATTAGGGTACGAGCAGTACTTC_TRBJ2-7	TRAC	TRAV29/DV5	TRAJ53	TGTGCAGCAAGCGCCCATAGTGGAGGTAGCAACTATAAACTGACATTT	TRAC	TRBV7-9	TRBJ2-7	TGTGCCACCAGATTAGGGTACGAGCAGTACTTC	60	Blood	10421	TRUE	FALSE	FALSE
ATAACGCGTGTAACGG-1-P190604_Blood_1	clone_P190604:10605:1	P190604	P190604_TRAV38-1_TGTGCTTTCACCAGATCAGGAAACACACCTCTTGTCTTT_TRAJ29:P190604_TRBV6-1_TGTGCCAGCAGTGGGCAGCTATACGCGACTAATGAAAAACTGTTTTTT_TRBJ1-4	TRAC	TRAV38-1	TRAJ29	TGTGCTTTCACCAGATCAGGAAACACACCTCTTGTCTTT	TRAC	TRBV6-1	TRBJ1-4	TGTGCCAGCAGTGGGCAGCTATACGCGACTAATGAAAAACTGTTTTTT	1	Blood	10605	FALSE	FALSE	FALSE
ATAGACCAGTGTCCCG-1-P190604_Blood_1	clone_P190604:10444:1	P190604	P190604_TRAV29/DV5_TGTGCAGCAAGCGGATCAACCGGTAACCAGTTCTATTTT_TRAJ49:P190604_TRBV20-1_TGCAGTGCTATTTTGTGGAACGATTTATCGAACACTGAAGCTTTCTTT_TRBJ1-1	TRAC	TRAV29/DV5	TRAJ49	TGTGCAGCAAGCGGATCAACCGGTAACCAGTTCTATTTT	TRAC	TRBV20-1	TRBJ1-1	TGCAGTGCTATTTTGTGGAACGATTTATCGAACACTGAAGCTTTCTTT	1	Blood	10444	FALSE	FALSE	FALSE
ATCACGACACCAACCG-1-P190604_Blood_1	clone_P190604:9504:13	P190604	P190604_TRAV12-1_TGTGTGGGCCATAATGCAGGCAACATGCTCACCTTT_TRAJ39:P190604_TRBV20-1_TGCAGTGCTAGCTTGCCAGGGGCTCCTAGCAATCAGCCCCAGCATTTT_TRBJ1-5	TRAC	TRAV12-1	TRAJ39	TGTGTGGGCCATAATGCAGGCAACATGCTCACCTTT	TRAC	TRBV20-1	TRBJ1-5	TGCAGTGCTAGCTTGCCAGGGGCTCCTAGCAATCAGCCCCAGCATTTT	13	Blood	9504	TRUE	FALSE	FALSE
ATCACGATCCAAGTAC-1-P190604_Blood_1	clone_P190604:10222:26	P190604	P190604_TRAV23/DV6_TGTGCAGCAAGGGACACCGACAAGCTCATCTTT_TRAJ34:P190604_TRBV7-3_TGTGCCAGCAGCTTAAGACAGGGCGTGGAGGATACGCAGTATTTT_TRBJ2-3	TRAC	TRAV23/DV6	TRAJ34	TGTGCAGCAAGGGACACCGACAAGCTCATCTTT	TRAC	TRBV7-3	TRBJ2-3	TGTGCCAGCAGCTTAAGACAGGGCGTGGAGGATACGCAGTATTTT	26	Blood	10222	TRUE	FALSE	FALSE
ATCATCTCAGCCTGTG-1-P190604_Blood_1	clone_P190604:10295:5	P190604	P190604_TRAV26-1_TGCATCGTCAATTCAGGATACAGCACCCTCACCTTT_TRAJ11:P190604_TRBV11-2_TGTGCCAGCAGCTTAGGGCACCGGGACAGGCGGTTTCATGAGCAGTTCTTC_TRBJ2-1	TRAC	TRAV26-1	TRAJ11	TGCATCGTCAATTCAGGATACAGCACCCTCACCTTT	TRAC	TRBV11-2	TRBJ2-1	TGTGCCAGCAGCTTAGGGCACCGGGACAGGCGGTTTCATGAGCAGTTCTTC	5	Blood	10295	TRUE	FALSE	FALSE
ATCATCTTCAGGTTCA-1-P190604_Blood_1	clone_P190604:10762:1	P190604	P190604_TRAV6_TGTGCTCTAGACAAGGGAAACCAGGCAGGAACTGCTCTGATCTTT_TRAJ15:P190604_TRBV28_TGTGCCAGCAGTTTAAGGCCAGAACTTTATGGCTACACCTTC_TRBJ1-2	TRAC	TRAV6	TRAJ15	TGTGCTCTAGACAAGGGAAACCAGGCAGGAACTGCTCTGATCTTT	TRAC	TRBV28	TRBJ1-2	TGTGCCAGCAGTTTAAGGCCAGAACTTTATGGCTACACCTTC	1	Blood	10762	FALSE	FALSE	FALSE
ATCATCTTCGCCCTTA-1-P190604_Blood_1	clone_P190604:9525:1	P190604	P190604_TRAV12-1_TGTGTGGTGAACATGCTAGGAAATACCGGCACTGCCAGTAAACTCACCTTT_TRAJ44:P190604_TRBV15_TGTGCCACCAGCCGTTACGGGACGGTGGGTCAGCCCCAGCATTTT_TRBJ1-5	TRAC	TRAV12-1	TRAJ44	TGTGTGGTGAACATGCTAGGAAATACCGGCACTGCCAGTAAACTCACCTTT	TRAC	TRBV15	TRBJ1-5	TGTGCCACCAGCCGTTACGGGACGGTGGGTCAGCCCCAGCATTTT	1	Blood	9525	FALSE	FALSE	FALSE
ATCATGGAGAGGTTGC-1-P190604_Blood_1	clone_P190604:9641:1	P190604	P190604_TRAV12-2_TGTGCCGTGGGGGGCGTCACGGGAGGAGGAAACAAACTCACCTTT_TRAJ10:P190604_TRBV13_TGTGCCAGCAGCCTCAACACTGAAGCTTTCTTT_TRBJ1-1	TRAC	TRAV12-2	TRAJ10	TGTGCCGTGGGGGGCGTCACGGGAGGAGGAAACAAACTCACCTTT	TRAC	TRBV13	TRBJ1-1	TGTGCCAGCAGCCTCAACACTGAAGCTTTCTTT	1	Blood	9641	FALSE	FALSE	FALSE
ATCATGGAGTGTACTC-1-P190604_Blood_1	clone_P190604:10115:29	P190604	P190604_TRAV21_TGTGCTGCGGGGATGGATAGCAACTATCAGTTAATCTGG_TRAJ33:P190604_TRBV27_TGTGCCAGCAGTCCTCGGACAGGGACCGGCGAGCAGTACTTC_TRBJ2-7	TRAC	TRAV21	TRAJ33	TGTGCTGCGGGGATGGATAGCAACTATCAGTTAATCTGG	TRAC	TRBV27	TRBJ2-7	TGTGCCAGCAGTCCTCGGACAGGGACCGGCGAGCAGTACTTC	29	Blood	10115	TRUE	FALSE	FALSE
ATCATGGCAATCAGAA-1-P190604_Blood_1	clone_P190604:10665:6	P190604	P190604_TRAV4_TGCCTCGTGCGGAGCTCTACCGGCACTGCCAGTAAACTCACCTTT_TRAJ44:P190604_TRBV7-3_TGTGCCAGCAGCTTAATAGCGGGAGGGATCACAGATACGCAGTATTTT_TRBJ2-3	TRAC	TRAV4	TRAJ44	TGCCTCGTGCGGAGCTCTACCGGCACTGCCAGTAAACTCACCTTT	TRAC	TRBV7-3	TRBJ2-3	TGTGCCAGCAGCTTAATAGCGGGAGGGATCACAGATACGCAGTATTTT	6	Blood	10665	TRUE	FALSE	FALSE
ATCCACCCAAATTGCC-1-P190604_Blood_1	clone_P190604:9395:2	P190604	P190604_TRAV1-2_TGTGCTGTGAGAGATGGCAACTATCAGTTAATCTGG_TRAJ33:P190604_TRBV6-1_TGTGCCAGCAGTGAAGAAGCGGGAGCCACCGGGGAGCTGTTTTTT_TRBJ2-2	TRAC	TRAV1-2	TRAJ33	TGTGCTGTGAGAGATGGCAACTATCAGTTAATCTGG	TRAC	TRBV6-1	TRBJ2-2	TGTGCCAGCAGTGAAGAAGCGGGAGCCACCGGGGAGCTGTTTTTT	2	Blood	9395	TRUE	TRUE	FALSE
ATCTACTGTACAGTTC-1-P190604_Blood_1	clone_P190604:10875:1	P190604	P190604_TRAV8-3_TGTGCTGTGGTGCAGAATAATGCAGGCAACATGCTCACCTTT_TRAJ39:P190604_TRBV20-1_TGCAGTGCTAGGTGGGGGGAGTACGAGCAGTACTTC_TRBJ2-7	TRAC	TRAV8-3	TRAJ39	TGTGCTGTGGTGCAGAATAATGCAGGCAACATGCTCACCTTT	TRAC	TRBV20-1	TRBJ2-7	TGCAGTGCTAGGTGGGGGGAGTACGAGCAGTACTTC	1	Blood	10875	FALSE	FALSE	FALSE
ATCTGCCGTTCCCGAG-1-P190604_Blood_1	clone_P190604:9721:1	P190604	P190604_TRAV13-1_TGTGCAGCAAGTATACAATACAATGCTGGCAACAACCGTAAGCTGATTTGG_TRAJ38:P190604_TRBV5-1_TGCGCCAGCAGCAAACTAGCGGGGAACGGGAACTACGAGCAGTACTTC_TRBJ2-7	TRAC	TRAV13-1	TRAJ38	TGTGCAGCAAGTATACAATACAATGCTGGCAACAACCGTAAGCTGATTTGG	TRAC	TRBV5-1	TRBJ2-7	TGCGCCAGCAGCAAACTAGCGGGGAACGGGAACTACGAGCAGTACTTC	1	Blood	9721	FALSE	FALSE	FALSE
ATCTGCCTCAGGCGAA-1-P190604_Blood_1	clone_P190604:9915:8	P190604	P190604_TRAV17_TGTGCTACGGACGCCTTATCAGGAACCTACAAATACATCTTT_TRAJ40:P190604_TRBV13_TGTGCCAGCAGCTTAGGGCCCCCACTAGCGGGACAATACGAGCAGTACTTC_TRBJ2-7	TRAC	TRAV17	TRAJ40	TGTGCTACGGACGCCTTATCAGGAACCTACAAATACATCTTT	TRAC	TRBV13	TRBJ2-7	TGTGCCAGCAGCTTAGGGCCCCCACTAGCGGGACAATACGAGCAGTACTTC	8	Blood	9915	TRUE	FALSE	FALSE
ATGAGGGAGCTAGTGG-1-P190604_Blood_1	clone_P190604:10516:1	P190604	P190604_TRAV3_TGTGCTGTGAGAGACGGGGGAGGCTTTGGGAATGTGCTGCATTGC_TRAJ35:P190604_TRBV5-1_TGCGCCAGCAGCCTCACCGACACTAACTATGGCTACACCTTC_TRBJ1-2	TRAC	TRAV3	TRAJ35	TGTGCTGTGAGAGACGGGGGAGGCTTTGGGAATGTGCTGCATTGC	TRAC	TRBV5-1	TRBJ1-2	TGCGCCAGCAGCCTCACCGACACTAACTATGGCTACACCTTC	1	Blood	10516	FALSE	FALSE	FALSE
ATGAGGGCAGCTGTAT-1-P190604_Blood_1	clone_P190604:10128:1	P190604	P190604_TRAV21_TGTGCTGTGAAACCAGGCTCAACCCTGGGGAGGCTATACTTT_TRAJ18:P190604_TRBV19_TGTGCCAGTAGCAACCTAGGACTAGCGGGAGTAACAGATACGCAGTATTTT_TRBJ2-3	TRAC	TRAV21	TRAJ18	TGTGCTGTGAAACCAGGCTCAACCCTGGGGAGGCTATACTTT	TRAC	TRBV19	TRBJ2-3	TGTGCCAGTAGCAACCTAGGACTAGCGGGAGTAACAGATACGCAGTATTTT	1	Blood	10128	FALSE	FALSE	FALSE
ATGAGGGGTCGGATCC-1-P190604_Blood_1	clone_P190604:10163:12	P190604	P190604_TRAV21_TGTGCTGTGGAGGATAGCAACTATCAGTTAATCTGG_TRAJ33:P190604_TRBV5-1_TGCGCCAGCCGAGATACCATCGGGACAGACGACTATGGCTACACCTTC_TRBJ1-2	TRAC	TRAV21	TRAJ33	TGTGCTGTGGAGGATAGCAACTATCAGTTAATCTGG	TRAC	TRBV5-1	TRBJ1-2	TGCGCCAGCCGAGATACCATCGGGACAGACGACTATGGCTACACCTTC	12	Blood	10163	TRUE	FALSE	FALSE
ATGAGGGTCGCGTAGC-1-P190604_Blood_1	clone_P190604:10163:12	P190604	P190604_TRAV21_TGTGCTGTGGAGGATAGCAACTATCAGTTAATCTGG_TRAJ33:P190604_TRBV5-1_TGCGCCAGCCGAGATACCATCGGGACAGACGACTATGGCTACACCTTC_TRBJ1-2	TRAC	TRAV21	TRAJ33	TGTGCTGTGGAGGATAGCAACTATCAGTTAATCTGG	TRAC	TRBV5-1	TRBJ1-2	TGCGCCAGCCGAGATACCATCGGGACAGACGACTATGGCTACACCTTC	12	Blood	10163	TRUE	FALSE	FALSE
ATGCGATGTAGCTAAA-1-P190604_Blood_1	clone_P190604:10810:1	P190604	P190604_TRAV8-2_TGTGTTGTGAGTGATCGGCCCCCATTTCAGGGAGCCCAGAAGCTGGTATTT_TRAJ54:P190604_TRBV3-1_TGTGCCAGCAGCCGCCTAGGGGAGACCCAGTACTTC_TRBJ2-5	TRAC	TRAV8-2	TRAJ54	TGTGTTGTGAGTGATCGGCCCCCATTTCAGGGAGCCCAGAAGCTGGTATTT	TRAC	TRBV3-1	TRBJ2-5	TGTGCCAGCAGCCGCCTAGGGGAGACCCAGTACTTC	1	Blood	10810	FALSE	FALSE	FALSE
ATGGGAGAGGTACTCT-1-P190604_Blood_1	clone_P190604:9847:1	P190604	P190604_TRAV14/DV4_TGTGCAATGAGAGATCTGCCTTATAACCAGGGAGGAAAGCTTATCTTC_TRAJ23:P190604_TRBV7-9_TGTGCCAGCAGCTCCTCCGGGACTAAACAAGAGACCCAGTACTTC_TRBJ2-5	TRAC	TRAV14/DV4	TRAJ23	TGTGCAATGAGAGATCTGCCTTATAACCAGGGAGGAAAGCTTATCTTC	TRAC	TRBV7-9	TRBJ2-5	TGTGCCAGCAGCTCCTCCGGGACTAAACAAGAGACCCAGTACTTC	1	Blood	9847	FALSE	FALSE	FALSE
ATGGGAGTCGTTTATC-1-P190604_Blood_1	clone_P190604:9872:1	P190604	P190604_TRAV16_TGTGCTCTAAAGGTCAGAAATGCAGGCAACATGCTCACCTTT_TRAJ39:P190604_TRBV15_TGTGCCACCAGCGTACCTCCGACCTACAATGAGCAGTTCTTC_TRBJ2-1	TRAC	TRAV16	TRAJ39	TGTGCTCTAAAGGTCAGAAATGCAGGCAACATGCTCACCTTT	TRAC	TRBV15	TRBJ2-1	TGTGCCACCAGCGTACCTCCGACCTACAATGAGCAGTTCTTC	1	Blood	9872	FALSE	FALSE	FALSE
ATTACTCTCAAGGTAA-1-P190604_Blood_1	clone_P190604:10421:60	P190604	P190604_TRAV29/DV5_TGTGCAGCAAGCGCCCATAGTGGAGGTAGCAACTATAAACTGACATTT_TRAJ53:P190604_TRBV7-9_TGTGCCACCAGATTAGGGTACGAGCAGTACTTC_TRBJ2-7	TRAC	TRAV29/DV5	TRAJ53	TGTGCAGCAAGCGCCCATAGTGGAGGTAGCAACTATAAACTGACATTT	TRAC	TRBV7-9	TRBJ2-7	TGTGCCACCAGATTAGGGTACGAGCAGTACTTC	60	Blood	10421	TRUE	FALSE	FALSE
ATTGGTGAGTCGAGTG-1-P190604_Blood_1	clone_P190604:10032:1	P190604	P190604_TRAV2_TGTGCTGTAGATAGCAACTATCAGTTAATCTGG_TRAJ33:P190604_TRBV28_TGTGCCAGCAGTTTTCCTGCTACAGGGAGGGCCAAAAACATTCAGTACTTC_TRBJ2-4	TRAC	TRAV2	TRAJ33	TGTGCTGTAGATAGCAACTATCAGTTAATCTGG	TRAC	TRBV28	TRBJ2-4	TGTGCCAGCAGTTTTCCTGCTACAGGGAGGGCCAAAAACATTCAGTACTTC	1	Blood	10032	FALSE	FALSE	FALSE
ATTGGTGCACAAGCCC-1-P190604_Blood_1	clone_P190604:10909:1	P190604	P190604_TRAV8-4_TGTGCTGTGAGTGACAGAAATGAGAAATTAACCTTT_TRAJ48:P190604_TRBV28_TGTGCCAGCGGACCGGAGAACTATGGCTACACCTTC_TRBJ1-2	TRAC	TRAV8-4	TRAJ48	TGTGCTGTGAGTGACAGAAATGAGAAATTAACCTTT	TRAC	TRBV28	TRBJ1-2	TGTGCCAGCGGACCGGAGAACTATGGCTACACCTTC	1	Blood	10909	FALSE	FALSE	FALSE
ATTTCTGCAGCGATCC-1-P190604_Blood_1	clone_P190604:9602:5	P190604	P190604_TRAV12-2_TGTGCCGTGAACCTCTTCCTTTATGGTGGTGCTACAAACAAGCTCATCTTT_TRAJ32:P190604_TRBV6-2_TGTGCCAGCAGTTACATACCCAGGGAAACCTACGAGCAGTACTTC_TRBJ2-7	TRAC	TRAV12-2	TRAJ32	TGTGCCGTGAACCTCTTCCTTTATGGTGGTGCTACAAACAAGCTCATCTTT	TRAC	TRBV6-2	TRBJ2-7	TGTGCCAGCAGTTACATACCCAGGGAAACCTACGAGCAGTACTTC	5	Blood	9602	TRUE	FALSE	FALSE
ATTTCTGTCATTATCC-1-P190604_Blood_1	clone_P190604:9538:1	P190604	P190604_TRAV12-1_TGTGTGGTGAACGGGGCTGCAGGCAACAAGCTAACTTTT_TRAJ17:P190604_TRBV27_TGTGCCAGCAGCCCCGTTTTAGAGGGGGCAAGTGAAAAACTGTTTTTT_TRBJ1-4	TRAC	TRAV12-1	TRAJ17	TGTGTGGTGAACGGGGCTGCAGGCAACAAGCTAACTTTT	TRAC	TRBV27	TRBJ1-4	TGTGCCAGCAGCCCCGTTTTAGAGGGGGCAAGTGAAAAACTGTTTTTT	1	Blood	9538	FALSE	FALSE	FALSE
CAACTAGCAGCTGCAC-1-P190604_Blood_1	clone_P190604:10405:1	P190604	P190604_TRAV29/DV5_TGTGCAGCAAGCAATGGCGGGGCTGGGAGTTACCAACTCACTTTC_TRAJ28:P190604_TRBV7-3_TGTGCCAGCAGCTTAAACGGGGAGGGCATTCAGTACTTC_TRBJ2-4	TRAC	TRAV29/DV5	TRAJ28	TGTGCAGCAAGCAATGGCGGGGCTGGGAGTTACCAACTCACTTTC	TRAC	TRBV7-3	TRBJ2-4	TGTGCCAGCAGCTTAAACGGGGAGGGCATTCAGTACTTC	1	Blood	10405	FALSE	FALSE	FALSE
CAACTAGGTTAAAGTG-1-P190604_Blood_1	clone_P190604:10796:1	P190604	P190604_TRAV8-1_TGTGCCGTGCCAGGGGCGAGTAGTAACAATGCCAGACTCATGTTT_TRAJ31:P190604_TRBV5-4_TGTGCCAGCAGCCCCGGACAGAAGAACACTGAAGCTTTCTTT_TRBJ1-1	TRAC	TRAV8-1	TRAJ31	TGTGCCGTGCCAGGGGCGAGTAGTAACAATGCCAGACTCATGTTT	TRAC	TRBV5-4	TRBJ1-1	TGTGCCAGCAGCCCCGGACAGAAGAACACTGAAGCTTTCTTT	1	Blood	10796	FALSE	FALSE	FALSE
CAAGAAAGTCATCCCT-1-P190604_Blood_1	clone_P190604:10421:60	P190604	P190604_TRAV29/DV5_TGTGCAGCAAGCGCCCATAGTGGAGGTAGCAACTATAAACTGACATTT_TRAJ53:P190604_TRBV7-9_TGTGCCACCAGATTAGGGTACGAGCAGTACTTC_TRBJ2-7	TRAC	TRAV29/DV5	TRAJ53	TGTGCAGCAAGCGCCCATAGTGGAGGTAGCAACTATAAACTGACATTT	TRAC	TRBV7-9	TRBJ2-7	TGTGCCACCAGATTAGGGTACGAGCAGTACTTC	60	Blood	10421	TRUE	FALSE	FALSE
CAAGGCCGTGACCAAG-1-P190604_Blood_1	clone_P190604:9741:1	P190604	P190604_TRAV13-1_TGTGCAGCAAGTGGCGAGGGAGGAGGTGCTGACGGACTCACCTTT_TRAJ45:P190604_TRBV20-1_TGCAGTCCCCGCGGGGGGGGAAACTATGGCTACACCTTC_TRBJ1-2	TRAC	TRAV13-1	TRAJ45	TGTGCAGCAAGTGGCGAGGGAGGAGGTGCTGACGGACTCACCTTT	TRAC	TRBV20-1	TRBJ1-2	TGCAGTCCCCGCGGGGGGGGAAACTATGGCTACACCTTC	1	Blood	9741	FALSE	FALSE	FALSE
CAAGGCCTCACTATTC-1-P190604_Blood_1	clone_P190604:10369:1	P190604	P190604_TRAV27_TGTGCAGGAGAGTGGGCTAACTTTGGAAATGAGAAATTAACCTTT_TRAJ48:P190604_TRBV28_TGTGCCAGCAGTTTACAACCGGAGGGGGCTGAAGCTTTCTTT_TRBJ1-1	TRAC	TRAV27	TRAJ48	TGTGCAGGAGAGTGGGCTAACTTTGGAAATGAGAAATTAACCTTT	TRAC	TRBV28	TRBJ1-1	TGTGCCAGCAGTTTACAACCGGAGGGGGCTGAAGCTTTCTTT	1	Blood	10369	FALSE	FALSE	FALSE
CAAGTTGGTGATAAGT-1-P190604_Blood_1	clone_P190604:10924:1	P190604	P190604_TRAV8-4_TGTGCTGTGAGTGGAGAGGGATCTTCTGGTTCTGCAAGGCAACTGACCTTT_TRAJ22:P190604_TRBV10-2_TGCGCCAGCAGGTCTGGACAGCTCTCTGGAAACACCATATATTTT_TRBJ1-3	TRAC	TRAV8-4	TRAJ22	TGTGCTGTGAGTGGAGAGGGATCTTCTGGTTCTGCAAGGCAACTGACCTTT	TRAC	TRBV10-2	TRBJ1-3	TGCGCCAGCAGGTCTGGACAGCTCTCTGGAAACACCATATATTTT	1	Blood	10924	FALSE	FALSE	FALSE
CAAGTTGTCTGACCTC-1-P190604_Blood_1	clone_P190604:9869:1	P190604	P190604_TRAV16_TGTGCTCTAAAAGGCGGGGGTTACCAGAAAGTTACCTTT_TRAJ13:P190604_TRBV20-1_TGCAGTGCCGACTACAGGGGTGAAGCTTTCTTT_TRBJ1-1	TRAC	TRAV16	TRAJ13	TGTGCTCTAAAAGGCGGGGGTTACCAGAAAGTTACCTTT	TRAC	TRBV20-1	TRBJ1-1	TGCAGTGCCGACTACAGGGGTGAAGCTTTCTTT	1	Blood	9869	FALSE	FALSE	FALSE
CACAAACCATCCCACT-1-P190604_Blood_1	clone_P190604:9341:1	P190604	P190604_TRAV1-2_TGTGCTGTATCTGACAGCTGGGGGAAATTCCAGTTT_TRAJ24:P190604_TRBV29-1_TGCAGCGTTGTAACGAATCGGGTCCAAGAGACCCAGTACTTC_TRBJ2-5	TRAC	TRAV1-2	TRAJ24	TGTGCTGTATCTGACAGCTGGGGGAAATTCCAGTTT	TRAC	TRBV29-1	TRBJ2-5	TGCAGCGTTGTAACGAATCGGGTCCAAGAGACCCAGTACTTC	1	Blood	9341	FALSE	FALSE	FALSE
CACAAACGTACCTACA-1-P190604_Blood_1	clone_P190604:10421:60	P190604	P190604_TRAV29/DV5_TGTGCAGCAAGCGCCCATAGTGGAGGTAGCAACTATAAACTGACATTT_TRAJ53:P190604_TRBV7-9_TGTGCCACCAGATTAGGGTACGAGCAGTACTTC_TRBJ2-7	TRAC	TRAV29/DV5	TRAJ53	TGTGCAGCAAGCGCCCATAGTGGAGGTAGCAACTATAAACTGACATTT	TRAC	TRBV7-9	TRBJ2-7	TGTGCCACCAGATTAGGGTACGAGCAGTACTTC	60	Blood	10421	TRUE	FALSE	FALSE
CACACCTGTATCTGCA-1-P190604_Blood_1	clone_P190604:11016:1	P190604	P190604_TRAV9-2_TGTGCTCTGAGTGATCGAGGCCGGAGTTCAGGAAACACACCTCTTGTCTTT_TRAJ29:P190604_TRBV30_TGTGCCACCACACAGGGTTCCGGAAACACCATATATTTT_TRBJ1-3	TRAC	TRAV9-2	TRAJ29	TGTGCTCTGAGTGATCGAGGCCGGAGTTCAGGAAACACACCTCTTGTCTTT	TRAC	TRBV30	TRBJ1-3	TGTGCCACCACACAGGGTTCCGGAAACACCATATATTTT	1	Blood	11016	FALSE	FALSE	FALSE
CACACTCCAAGTCTGT-1-P190604_Blood_1	clone_P190604:10226:1	P190604	P190604_TRAV23/DV6_TGTGCAGCAAGTTGGGGTCGCAATAACAATGACATGCGCTTT_TRAJ43:P190604_TRBV6-2_TGTGCCAGCAGTTACTCGGTGGAAAACCCGGGATCCCAAGAGACCCAGTACTTC_TRBJ2-5	TRAC	TRAV23/DV6	TRAJ43	TGTGCAGCAAGTTGGGGTCGCAATAACAATGACATGCGCTTT	TRAC	TRBV6-2	TRBJ2-5	TGTGCCAGCAGTTACTCGGTGGAAAACCCGGGATCCCAAGAGACCCAGTACTTC	1	Blood	10226	FALSE	FALSE	FALSE
CACAGGCTCGGAATCT-1-P190604_Blood_1	clone_P190604:9822:1	P190604	P190604_TRAV14/DV4_TGTGCAATGAGAGAGGATTACAATAACAATGACATGCGCTTT_TRAJ43:P190604_TRBV28_TGTGCCAGCAGTTTAGGACAGGGGGGTTCACCCCTCCACTTT_TRBJ1-6	TRAC	TRAV14/DV4	TRAJ43	TGTGCAATGAGAGAGGATTACAATAACAATGACATGCGCTTT	TRAC	TRBV28	TRBJ1-6	TGTGCCAGCAGTTTAGGACAGGGGGGTTCACCCCTCCACTTT	1	Blood	9822	FALSE	FALSE	FALSE
CACAGTACACGAAATA-1-P190604_Blood_1	clone_P190604:9880:1	P190604	P190604_TRAV16_TGTGCTCTAAGTGGTGAGGCAAACAACCTCTTCTTT_TRAJ36:P190604_TRBV5-1_TGCGCCAGCAGCTTCGGAACAACTAATGAAAAACTGTTTTTT_TRBJ1-4	TRAC	TRAV16	TRAJ36	TGTGCTCTAAGTGGTGAGGCAAACAACCTCTTCTTT	TRAC	TRBV5-1	TRBJ1-4	TGCGCCAGCAGCTTCGGAACAACTAATGAAAAACTGTTTTTT	1	Blood	9880	FALSE	FALSE	FALSE
CACATAGAGCTAGCCC-1-P190604_Blood_1	clone_P190604:9853:1	P190604	P190604_TRAV14/DV4_TGTGCAATGAGAGGTAACCAGGGAGGAAAGCTTATCTTC_TRAJ23:P190604_TRBV18_TGTGCCAGCTCACCGACAGGGTTAAATGAGCAGTTCTTC_TRBJ2-1	TRAC	TRAV14/DV4	TRAJ23	TGTGCAATGAGAGGTAACCAGGGAGGAAAGCTTATCTTC	TRAC	TRBV18	TRBJ2-1	TGTGCCAGCTCACCGACAGGGTTAAATGAGCAGTTCTTC	1	Blood	9853	FALSE	FALSE	FALSE
CACATAGTCATCGGAT-1-P190604_Blood_1	clone_P190604:10344:1	P190604	P190604_TRAV26-2_TGCATCCTGAGAGACGGAGGAGGAGGTGCTGACGGACTCACCTTT_TRAJ45:P190604_TRBV11-2_TGTGCCAGCAGCCTAGCGGGAGTGCCCTACGAGCAGTACTTC_TRBJ2-7	TRAC	TRAV26-2	TRAJ45	TGCATCCTGAGAGACGGAGGAGGAGGTGCTGACGGACTCACCTTT	TRAC	TRBV11-2	TRBJ2-7	TGTGCCAGCAGCCTAGCGGGAGTGCCCTACGAGCAGTACTTC	1	Blood	10344	FALSE	FALSE	FALSE
CACATTTGTTTAGCTG-1-P190604_Blood_1	clone_P190604:10956:1	P190604	P190604_TRAV8-6_TGTGCTGTGAGTGGGGACCAGGGAGGAAAGCTTATCTTC_TRAJ23:P190604_TRBV7-9_TGTGCCAGCAGCCCAGGCATACTAGCTTCTGCTAATGAGCAGTTCTTC_TRBJ2-1	TRAC	TRAV8-6	TRAJ23	TGTGCTGTGAGTGGGGACCAGGGAGGAAAGCTTATCTTC	TRAC	TRBV7-9	TRBJ2-1	TGTGCCAGCAGCCCAGGCATACTAGCTTCTGCTAATGAGCAGTTCTTC	1	Blood	10956	FALSE	FALSE	FALSE
CACCACTAGGATGGTC-1-P190604_Blood_1	clone_P190604:10486:1	P190604	P190604_TRAV3_TGTGCTGTGAGACGTAACCAGGGAGGAAAGCTTATCTTC_TRAJ23:P190604_TRBV20-1_TGCAGTGCTAGAGAAGTCACGCAGCGGAACGTTTACAATGAGCAGTTCTTC_TRBJ2-1	TRAC	TRAV3	TRAJ23	TGTGCTGTGAGACGTAACCAGGGAGGAAAGCTTATCTTC	TRAC	TRBV20-1	TRBJ2-1	TGCAGTGCTAGAGAAGTCACGCAGCGGAACGTTTACAATGAGCAGTTCTTC	1	Blood	10486	FALSE	FALSE	FALSE
CACCAGGAGGAGCGAG-1-P190604_Blood_1	clone_P190604:10115:29	P190604	P190604_TRAV21_TGTGCTGCGGGGATGGATAGCAACTATCAGTTAATCTGG_TRAJ33:P190604_TRBV27_TGTGCCAGCAGTCCTCGGACAGGGACCGGCGAGCAGTACTTC_TRBJ2-7	TRAC	TRAV21	TRAJ33	TGTGCTGCGGGGATGGATAGCAACTATCAGTTAATCTGG	TRAC	TRBV27	TRBJ2-7	TGTGCCAGCAGTCCTCGGACAGGGACCGGCGAGCAGTACTTC	29	Blood	10115	TRUE	FALSE	FALSE
CACCAGGAGGGATACC-1-P190604_Blood_1	clone_P190604:9502:1	P190604	P190604_TRAV12-1_TGTGTGGCGACCTACAACTTCAACAAATTTTACTTT_TRAJ21:P190604_TRBV20-1_TGCAGTGCCCGGACTAGCGGGAACTCCTACGAGCAGTACTTC_TRBJ2-7	TRAC	TRAV12-1	TRAJ21	TGTGTGGCGACCTACAACTTCAACAAATTTTACTTT	TRAC	TRBV20-1	TRBJ2-7	TGCAGTGCCCGGACTAGCGGGAACTCCTACGAGCAGTACTTC	1	Blood	9502	FALSE	FALSE	FALSE
CACCAGGAGGGCTCTC-1-P190604_Blood_1	clone_P190604:10517:1	P190604	P190604_TRAV3_TGTGCTGTGAGAGACGGGGGTTACCAGAAAGTTACCTTT_TRAJ13:P190604_TRBV29-1_TGCAGCGTTGATGGTCAGTCGAACACTGAAGCTTTCTTT_TRBJ1-1	TRAC	TRAV3	TRAJ13	TGTGCTGTGAGAGACGGGGGTTACCAGAAAGTTACCTTT	TRAC	TRBV29-1	TRBJ1-1	TGCAGCGTTGATGGTCAGTCGAACACTGAAGCTTTCTTT	1	Blood	10517	FALSE	FALSE	FALSE
CACCTTGTCGGTTCGG-1-P190604_Blood_1	clone_P190604:9915:8	P190604	P190604_TRAV17_TGTGCTACGGACGCCTTATCAGGAACCTACAAATACATCTTT_TRAJ40:P190604_TRBV13_TGTGCCAGCAGCTTAGGGCCCCCACTAGCGGGACAATACGAGCAGTACTTC_TRBJ2-7	TRAC	TRAV17	TRAJ40	TGTGCTACGGACGCCTTATCAGGAACCTACAAATACATCTTT	TRAC	TRBV13	TRBJ2-7	TGTGCCAGCAGCTTAGGGCCCCCACTAGCGGGACAATACGAGCAGTACTTC	8	Blood	9915	TRUE	FALSE	FALSE
CACTCCAAGCTCTCGG-1-P190604_Blood_1	clone_P190604:10496:1	P190604	P190604_TRAV3_TGTGCTGTGAGAGACATAAGAAACCAGGGAGGAAAGCTTATCTTC_TRAJ23:P190604_TRBV10-1_TGCGCCAGCAGTGGGTATCTTAGCGGGAAGACAGATACGCAGTATTTT_TRBJ2-3	TRAC	TRAV3	TRAJ23	TGTGCTGTGAGAGACATAAGAAACCAGGGAGGAAAGCTTATCTTC	TRAC	TRBV10-1	TRBJ2-3	TGCGCCAGCAGTGGGTATCTTAGCGGGAAGACAGATACGCAGTATTTT	1	Blood	10496	FALSE	FALSE	FALSE
CAGAATCAGGTGCAAC-1-P190604_Blood_1	clone_P190604:11037:1	P190604	P190604_TRAV9-2_TGTGCTCTGCGGAATTCAGGAAACACACCTCTTGTCTTT_TRAJ29:P190604_TRBV4-2_TGTGCCAGCAGCCAAGGCACCTCCGGGACAGGGGGATGGAACACCGGGGAGCTGTTTTTT_TRBJ2-2	TRAC	TRAV9-2	TRAJ29	TGTGCTCTGCGGAATTCAGGAAACACACCTCTTGTCTTT	TRAC	TRBV4-2	TRBJ2-2	TGTGCCAGCAGCCAAGGCACCTCCGGGACAGGGGGATGGAACACCGGGGAGCTGTTTTTT	1	Blood	11037	FALSE	FALSE	FALSE
CAGATCAAGTGTGAAT-1-P190604_Blood_1	clone_P190604:9735:1	P190604	P190604_TRAV13-1_TGTGCAGCAAGTCGGTATAACCAGGGAGGAAAGCTTATCTTC_TRAJ23:P190604_TRBV12-4_TGTGCCTCAGCCCTGGGGGCAGGGGGCGAGCAGTACTTC_TRBJ2-7	TRAC	TRAV13-1	TRAJ23	TGTGCAGCAAGTCGGTATAACCAGGGAGGAAAGCTTATCTTC	TRAC	TRBV12-4	TRBJ2-7	TGTGCCTCAGCCCTGGGGGCAGGGGGCGAGCAGTACTTC	1	Blood	9735	FALSE	FALSE	FALSE
CAGATCAGTGCAGGTA-1-P190604_Blood_1	clone_P190604:9738:1	P190604	P190604_TRAV13-1_TGTGCAGCAAGTGAAGGGCGTCTCGGAGGAGGTGCTGACGGACTCACCTTT_TRAJ45:P190604_TRBV6-6_TGTGCCAGCAGTTACTCTTCCGGAAGCAATCAGCCCCAGCATTTT_TRBJ1-5	TRAC	TRAV13-1	TRAJ45	TGTGCAGCAAGTGAAGGGCGTCTCGGAGGAGGTGCTGACGGACTCACCTTT	TRAC	TRBV6-6	TRBJ1-5	TGTGCCAGCAGTTACTCTTCCGGAAGCAATCAGCCCCAGCATTTT	1	Blood	9738	FALSE	FALSE	FALSE
CAGCAGCGTAGAAGGA-1-P190604_Blood_1	clone_P190604:9803:1	P190604	P190604_TRAV13-2_TGTGCAGAGCTGGGGGGAAACACACCTCTTGTCTTT_TRAJ29:P190604_TRBV20-1_TGCAGTCCTCACAGGCGGCAAGGGGAAAAACTGTTTTTT_TRBJ1-4	TRAC	TRAV13-2	TRAJ29	TGTGCAGAGCTGGGGGGAAACACACCTCTTGTCTTT	TRAC	TRBV20-1	TRBJ1-4	TGCAGTCCTCACAGGCGGCAAGGGGAAAAACTGTTTTTT	1	Blood	9803	FALSE	FALSE	FALSE
CAGCCGAGTGTAACGG-1-P190604_Blood_1	clone_P190604:9766:1	P190604	P190604_TRAV13-2_TGTGCAGACGCGCAGATGAACACCAATGCAGGCAAATCAACCTTT_TRAJ27:P190604_TRBV28_TGTGCCAGCAGCCCCAGGGGGCGACGTGAAAAACTGTTTTTT_TRBJ1-4	TRAC	TRAV13-2	TRAJ27	TGTGCAGACGCGCAGATGAACACCAATGCAGGCAAATCAACCTTT	TRAC	TRBV28	TRBJ1-4	TGTGCCAGCAGCCCCAGGGGGCGACGTGAAAAACTGTTTTTT	1	Blood	9766	FALSE	FALSE	FALSE
CAGCGACGTCGAGATG-1-P190604_Blood_1	clone_P190604:9712:1	P190604	P190604_TRAV13-1_TGTGCAGCAAGTAAGGGGTTGGCGGGTGGAGGTAGCAACTATAAACTGACATTT_TRAJ53:P190604_TRBV5-6_TGTGCCAGCAGCAGCAGGAGGGAGCAGTACTTC_TRBJ2-7	TRAC	TRAV13-1	TRAJ53	TGTGCAGCAAGTAAGGGGTTGGCGGGTGGAGGTAGCAACTATAAACTGACATTT	TRAC	TRBV5-6	TRBJ2-7	TGTGCCAGCAGCAGCAGGAGGGAGCAGTACTTC	1	Blood	9712	FALSE	FALSE	FALSE
CAGCGACTCCACGACG-1-P190604_Blood_1	clone_P190604:10814:7	P190604	P190604_TRAV8-2_TGTGTTGTGAGTGATGGTTATGGTGGTGCTACAAACAAGCTCATCTTT_TRAJ32:P190604_TRBV5-8_TGTGCCAGCAGCGTGGGGCCTGGGCGGGAGGGCGAAGAGACCCAGTACTTC_TRBJ2-5	TRAC	TRAV8-2	TRAJ32	TGTGTTGTGAGTGATGGTTATGGTGGTGCTACAAACAAGCTCATCTTT	TRAC	TRBV5-8	TRBJ2-5	TGTGCCAGCAGCGTGGGGCCTGGGCGGGAGGGCGAAGAGACCCAGTACTTC	7	Blood	10814	TRUE	FALSE	FALSE
CAGCTGGCAGGAACGT-1-P190604_Blood_1	clone_P190604:10799:1	P190604	P190604_TRAV8-2_TGTGTTCCCTACGCCTCAGGAACCTACAAATACATCTTT_TRAJ40:P190604_TRBV19_TGTGCCAGTGTTGAGAGGGGTGGTAGTCAGCCCCAGCATTTT_TRBJ1-5	TRAC	TRAV8-2	TRAJ40	TGTGTTCCCTACGCCTCAGGAACCTACAAATACATCTTT	TRAC	TRBV19	TRBJ1-5	TGTGCCAGTGTTGAGAGGGGTGGTAGTCAGCCCCAGCATTTT	1	Blood	10799	FALSE	FALSE	FALSE
CAGGTGCCAATCAGAA-1-P190604_Blood_1	clone_P190604:10848:10	P190604	P190604_TRAV8-3_TGTGCTGTGGGTCCCGTCGACTTTGGAAATGAGAAATTAACCTTT_TRAJ48:P190604_TRBV27_TGTGCCAGCAGTTCAGGCACAGATACGCAGTATTTT_TRBJ2-3	TRAC	TRAV8-3	TRAJ48	TGTGCTGTGGGTCCCGTCGACTTTGGAAATGAGAAATTAACCTTT	TRAC	TRBV27	TRBJ2-3	TGTGCCAGCAGTTCAGGCACAGATACGCAGTATTTT	10	Blood	10848	TRUE	FALSE	FALSE
CAGGTGCCAGGTCTCG-1-P190604_Blood_1	clone_P190604:10421:60	P190604	P190604_TRAV29/DV5_TGTGCAGCAAGCGCCCATAGTGGAGGTAGCAACTATAAACTGACATTT_TRAJ53:P190604_TRBV7-9_TGTGCCACCAGATTAGGGTACGAGCAGTACTTC_TRBJ2-7	TRAC	TRAV29/DV5	TRAJ53	TGTGCAGCAAGCGCCCATAGTGGAGGTAGCAACTATAAACTGACATTT	TRAC	TRBV7-9	TRBJ2-7	TGTGCCACCAGATTAGGGTACGAGCAGTACTTC	60	Blood	10421	TRUE	FALSE	FALSE
CAGTAACTCTCACATT-1-P190604_Blood_1	clone_P190604:10831:1	P190604	P190604_TRAV8-3_TGTGCTGTGATCTGGATGGGTGGTACTAGCTATGGAAAGCTGACATTT_TRAJ52:P190604_TRBV2_TGTGCCAGCAGAACCCCTGGAGCCTACGAGCAGTACTTC_TRBJ2-7	TRAC	TRAV8-3	TRAJ52	TGTGCTGTGATCTGGATGGGTGGTACTAGCTATGGAAAGCTGACATTT	TRAC	TRBV2	TRBJ2-7	TGTGCCAGCAGAACCCCTGGAGCCTACGAGCAGTACTTC	1	Blood	10831	FALSE	FALSE	FALSE
CATATGGAGGAATCGC-1-P190604_Blood_1	clone_P190604:10554:1	P190604	P190604_TRAV30_TGCGGCACAGAGGGAGAAACCAGTGGCTCTAGGTTGACCTTT_TRAJ58:P190604_TRBV4-2_TGTGCCAGCAGCCAAGATGGACAGTCCTCCTACGAGCAGTACTTC_TRBJ2-7	TRAC	TRAV30	TRAJ58	TGCGGCACAGAGGGAGAAACCAGTGGCTCTAGGTTGACCTTT	TRAC	TRBV4-2	TRBJ2-7	TGTGCCAGCAGCCAAGATGGACAGTCCTCCTACGAGCAGTACTTC	1	Blood	10554	FALSE	FALSE	FALSE
CATATGGTCATAGCAC-1-P190604_Blood_1	clone_P190604:10659:1	P190604	P190604_TRAV39_TGTGCCGTGGACTTAATTTCTTCTGGTTCTGCAAGGCAACTGACCTTT_TRAJ22:P190604_TRBV5-1_TGCGCCAGCAGCTTGGCCCCCCCCTACCGTGAGACTGAGAAAAAGCAGTACTTC_TRBJ2-7	TRAC	TRAV39	TRAJ22	TGTGCCGTGGACTTAATTTCTTCTGGTTCTGCAAGGCAACTGACCTTT	TRAC	TRBV5-1	TRBJ2-7	TGCGCCAGCAGCTTGGCCCCCCCCTACCGTGAGACTGAGAAAAAGCAGTACTTC	1	Blood	10659	FALSE	FALSE	FALSE
CATATTCCACTCAGGC-1-P190604_Blood_1	clone_P190604:9508:1	P190604	P190604_TRAV12-1_TGTGTGGTGAAAAGGACGTCCGGGTATGCACTCAACTTC_TRAJ41:P190604_TRBV30_TGTGCCTGGACTCGGCAAGCAACCGGGGAGCTGTTTTTT_TRBJ2-2	TRAC	TRAV12-1	TRAJ41	TGTGTGGTGAAAAGGACGTCCGGGTATGCACTCAACTTC	TRAC	TRBV30	TRBJ2-2	TGTGCCTGGACTCGGCAAGCAACCGGGGAGCTGTTTTTT	1	Blood	9508	FALSE	FALSE	FALSE
CATATTCGTCGCGTGT-1-P190604_Blood_1	clone_P190604:9759:5	P190604	P190604_TRAV13-1_TGTGCAGCTTCTCTCCGTGGTGGTACTAGCTATGGAAAGCTGACATTT_TRAJ52:P190604_TRBV20-1_TGCAGTGCTAGGTCAGGATATTTCGGGGAGCTGTTTTTT_TRBJ2-2	TRAC	TRAV13-1	TRAJ52	TGTGCAGCTTCTCTCCGTGGTGGTACTAGCTATGGAAAGCTGACATTT	TRAC	TRBV20-1	TRBJ2-2	TGCAGTGCTAGGTCAGGATATTTCGGGGAGCTGTTTTTT	5	Blood	9759	TRUE	FALSE	FALSE
CATCAAGAGACAAGCC-1-P190604_Blood_1	clone_P190604:9938:1	P190604	P190604_TRAV17_TGTGCTACGGCCGACACAGGCTTTCAGAAACTTGTATTT_TRAJ8:P190604_TRBV19_TGTGCCAGTAGTACAGCCCTTGTGGATTCTGGCTACACCTTC_TRBJ1-2	TRAC	TRAV17	TRAJ8	TGTGCTACGGCCGACACAGGCTTTCAGAAACTTGTATTT	TRAC	TRBV19	TRBJ1-2	TGTGCCAGTAGTACAGCCCTTGTGGATTCTGGCTACACCTTC	1	Blood	9938	FALSE	FALSE	FALSE
CATCAGATCTATCCTA-1-P190604_Blood_1	clone_P190604:10239:1	P190604	P190604_TRAV24_TGTGCCAGCCCCTACTATATACTCACGGGAGGAGGAAACAAACTCACCTTT_TRAJ10:P190604_TRBV9_TGTGCCAGCAGCGTAGGAACGATGGGGCAAGAGACCCAGTACTTC_TRBJ2-5	TRAC	TRAV24	TRAJ10	TGTGCCAGCCCCTACTATATACTCACGGGAGGAGGAAACAAACTCACCTTT	TRAC	TRBV9	TRBJ2-5	TGTGCCAGCAGCGTAGGAACGATGGGGCAAGAGACCCAGTACTTC	1	Blood	10239	FALSE	FALSE	FALSE
CATCCACCAATCAGAA-1-P190604_Blood_1	clone_P190604:9726:1	P190604	P190604_TRAV13-1_TGTGCAGCAAGTATGACTGGTGGTACTAGCTATGGAAAGCTGACATTT_TRAJ52:P190604_TRBV6-5_TGTGCCAGCAGCCTTACGTCGGGTGGCTACGAGCAGTACTTC_TRBJ2-7	TRAC	TRAV13-1	TRAJ52	TGTGCAGCAAGTATGACTGGTGGTACTAGCTATGGAAAGCTGACATTT	TRAC	TRBV6-5	TRBJ2-7	TGTGCCAGCAGCCTTACGTCGGGTGGCTACGAGCAGTACTTC	1	Blood	9726	FALSE	FALSE	FALSE
CATCCACTCGGATGGA-1-P190604_Blood_1	clone_P190604:9504:13	P190604	P190604_TRAV12-1_TGTGTGGGCCATAATGCAGGCAACATGCTCACCTTT_TRAJ39:P190604_TRBV20-1_TGCAGTGCTAGCTTGCCAGGGGCTCCTAGCAATCAGCCCCAGCATTTT_TRBJ1-5	TRAC	TRAV12-1	TRAJ39	TGTGTGGGCCATAATGCAGGCAACATGCTCACCTTT	TRAC	TRBV20-1	TRBJ1-5	TGCAGTGCTAGCTTGCCAGGGGCTCCTAGCAATCAGCCCCAGCATTTT	13	Blood	9504	TRUE	FALSE	FALSE
CATCGAACAAGCCCAC-1-P190604_Blood_1	clone_P190604:10575:1	P190604	P190604_TRAV35_TGTGCTGGGCAAGGGGACGGTAACCAGTTCTATTTT_TRAJ49:P190604_TRBV13_TGTGCCAGCAGCTCCTACGCCGGGGCTCTAAACTATGGCTACACCTTC_TRBJ1-2	TRAC	TRAV35	TRAJ49	TGTGCTGGGCAAGGGGACGGTAACCAGTTCTATTTT	TRAC	TRBV13	TRBJ1-2	TGTGCCAGCAGCTCCTACGCCGGGGCTCTAAACTATGGCTACACCTTC	1	Blood	10575	FALSE	FALSE	FALSE
CATGCCTAGCTGATAA-1-P190604_Blood_1	clone_P190604:10072:1	P190604	P190604_TRAV20_TGTGCTGTCTACACGGGCAGGAGAGCACTTACTTTT_TRAJ5:P190604_TRBV7-6_TGTGCCAGCAGCGTATCGACAGGGAAGGACACCGGGGAGCTGTTTTTT_TRBJ2-2	TRAC	TRAV20	TRAJ5	TGTGCTGTCTACACGGGCAGGAGAGCACTTACTTTT	TRAC	TRBV7-6	TRBJ2-2	TGTGCCAGCAGCGTATCGACAGGGAAGGACACCGGGGAGCTGTTTTTT	1	Blood	10072	FALSE	FALSE	FALSE
CATGCCTCATACCATG-1-P190604_Blood_1	clone_P190604:10481:1	P190604	P190604_TRAV3_TGTGCTGTGAAAATTGCTGGAGGCTTCAAAACTATCTTT_TRAJ9:P190604_TRBV19_TGTGCCAGTAGTAGGGAGGAAGGGATTCAGCCCCAGCATTTT_TRBJ1-5	TRAC	TRAV3	TRAJ9	TGTGCTGTGAAAATTGCTGGAGGCTTCAAAACTATCTTT	TRAC	TRBV19	TRBJ1-5	TGTGCCAGTAGTAGGGAGGAAGGGATTCAGCCCCAGCATTTT	1	Blood	10481	FALSE	FALSE	FALSE
CATGCCTCATGGGAAC-1-P190604_Blood_1	clone_P190604:10235:1	P190604	P190604_TRAV23/DV6_TGTGCAGCGGCCCCTTCGAGAGGGGCTGGGAGTTACCAACTCACTTTC_TRAJ28:P190604_TRBV4-3_TGCGCCAGCAGCCAAAGGCAGGGAAAGTACGAGCAGTACTTC_TRBJ2-7	TRAC	TRAV23/DV6	TRAJ28	TGTGCAGCGGCCCCTTCGAGAGGGGCTGGGAGTTACCAACTCACTTTC	TRAC	TRBV4-3	TRBJ2-7	TGCGCCAGCAGCCAAAGGCAGGGAAAGTACGAGCAGTACTTC	1	Blood	10235	FALSE	FALSE	FALSE
CATTATCTCAAAGTAG-1-P190604_Blood_1	clone_P190604:10993:1	P190604	P190604_TRAV9-2_TGTGCTCTGAGGGAAATTCAGGGAGCCCAGAAGCTGGTATTT_TRAJ54:P190604_TRBV27_TGTGCCAGCAGTTTATTAGGCAGGGAGAACTATGGCTACACCTTC_TRBJ1-2	TRAC	TRAV9-2	TRAJ54	TGTGCTCTGAGGGAAATTCAGGGAGCCCAGAAGCTGGTATTT	TRAC	TRBV27	TRBJ1-2	TGTGCCAGCAGTTTATTAGGCAGGGAGAACTATGGCTACACCTTC	1	Blood	10993	FALSE	FALSE	FALSE
CCACCTATCGGATGGA-1-P190604_Blood_1	clone_P190604:9500:1	P190604	P190604_TRAV12-1_TGTGTACTGAATAGCAACTATCAGTTAATCTGG_TRAJ33:P190604_TRBV5-1_TGCGCCAGCAGCTTATCCGACACGAACACTGAAGCTTTCTTT_TRBJ1-1	TRAC	TRAV12-1	TRAJ33	TGTGTACTGAATAGCAACTATCAGTTAATCTGG	TRAC	TRBV5-1	TRBJ1-1	TGCGCCAGCAGCTTATCCGACACGAACACTGAAGCTTTCTTT	1	Blood	9500	FALSE	FALSE	FALSE
CCACGGATCGCACTCT-1-P190604_Blood_1	clone_P190604:10421:60	P190604	P190604_TRAV29/DV5_TGTGCAGCAAGCGCCCATAGTGGAGGTAGCAACTATAAACTGACATTT_TRAJ53:P190604_TRBV7-9_TGTGCCACCAGATTAGGGTACGAGCAGTACTTC_TRBJ2-7	TRAC	TRAV29/DV5	TRAJ53	TGTGCAGCAAGCGCCCATAGTGGAGGTAGCAACTATAAACTGACATTT	TRAC	TRBV7-9	TRBJ2-7	TGTGCCACCAGATTAGGGTACGAGCAGTACTTC	60	Blood	10421	TRUE	FALSE	FALSE
CCACTACTCGCCAAAT-1-P190604_Blood_1	clone_P190604:9985:1	P190604	P190604_TRAV19_TGTGCTCTGAGTGAGATGAACAGAGATGACAAGATCATCTTT_TRAJ30:P190604_TRBV27_TGTGCCAGCAGTTTAGGAGGTCCCTCCTACAATGAGCAGTTCTTC_TRBJ2-1	TRAC	TRAV19	TRAJ30	TGTGCTCTGAGTGAGATGAACAGAGATGACAAGATCATCTTT	TRAC	TRBV27	TRBJ2-1	TGTGCCAGCAGTTTAGGAGGTCCCTCCTACAATGAGCAGTTCTTC	1	Blood	9985	FALSE	FALSE	FALSE
CCAGCGAGTAAAGTCA-1-P190604_Blood_1	clone_P190604:10049:1	P190604	P190604_TRAV2_TGTGCTGTGGAGGATCCCGGTAACCAGTTCTATTTT_TRAJ49:P190604_TRBV4-1_TGCGCCAGCAGCCCGGGACAGCGGACGGTAGCAGATACGCAGTATTTT_TRBJ2-3	TRAC	TRAV2	TRAJ49	TGTGCTGTGGAGGATCCCGGTAACCAGTTCTATTTT	TRAC	TRBV4-1	TRBJ2-3	TGCGCCAGCAGCCCGGGACAGCGGACGGTAGCAGATACGCAGTATTTT	1	Blood	10049	FALSE	FALSE	FALSE
CCATTCGCATACTCTT-1-P190604_Blood_1	clone_P190604:10597:1	P190604	P190604_TRAV36/DV7_TGTGCTGTGCTGCTACAGGGAGCCCAGAAGCTGGTATTT_TRAJ54:P190604_TRBV29-1_TGCAGCTCTTATAGCGGGAGGGCCACGTATTTT_TRBJ2-3	TRAC	TRAV36/DV7	TRAJ54	TGTGCTGTGCTGCTACAGGGAGCCCAGAAGCTGGTATTT	TRAC	TRBV29-1	TRBJ2-3	TGCAGCTCTTATAGCGGGAGGGCCACGTATTTT	1	Blood	10597	FALSE	FALSE	FALSE
CCATTCGGTACCGTTA-1-P190604_Blood_1	clone_P190604:9649:1	P190604	P190604_TRAV12-2_TGTGCCGTTTTTTCAGATGGCCAGAAGCTGCTCTTT_TRAJ16:P190604_TRBV20-1_TGCAGTGCTAGAGATAGACTAGCGGCTAGCACAGATACGCAGTATTTT_TRBJ2-3	TRAC	TRAV12-2	TRAJ16	TGTGCCGTTTTTTCAGATGGCCAGAAGCTGCTCTTT	TRAC	TRBV20-1	TRBJ2-3	TGCAGTGCTAGAGATAGACTAGCGGCTAGCACAGATACGCAGTATTTT	1	Blood	9649	FALSE	FALSE	FALSE
CCCAGTTGTACATCCA-1-P190604_Blood_1	clone_P190604:9772:1	P190604	P190604_TRAV13-2_TGTGCAGAGAATAATCTCTCGGGTGGTACTAGCTATGGAAAGCTGACATTT_TRAJ52:P190604_TRBV28_TGTGCCAGCAGGGACCCCACCTACGAGCAGTACTTC_TRBJ2-7	TRAC	TRAV13-2	TRAJ52	TGTGCAGAGAATAATCTCTCGGGTGGTACTAGCTATGGAAAGCTGACATTT	TRAC	TRBV28	TRBJ2-7	TGTGCCAGCAGGGACCCCACCTACGAGCAGTACTTC	1	Blood	9772	FALSE	FALSE	FALSE
CCCTCCTTCCTTTCTC-1-P190604_Blood_1	clone_P190604:9878:1	P190604	P190604_TRAV16_TGTGCTCTAAGTGGCTATAACACCGACAAGCTCATCTTT_TRAJ34:P190604_TRBV28_TGTGCCAGCAGTACGGGACTAGCGGCCACCACAGATACGCAGTATTTT_TRBJ2-3	TRAC	TRAV16	TRAJ34	TGTGCTCTAAGTGGCTATAACACCGACAAGCTCATCTTT	TRAC	TRBV28	TRBJ2-3	TGTGCCAGCAGTACGGGACTAGCGGCCACCACAGATACGCAGTATTTT	1	Blood	9878	FALSE	FALSE	FALSE
CCGGGATTCTCCAGGG-1-P190604_Blood_1	clone_P190604:10309:1	P190604	P190604_TRAV26-1_TGCATCGTCAGAGTCCGTGAAGCTGCAGGCAACAAGCTAACTTTT_TRAJ17:P190604_TRBV30_TGTGCCTGGAGTTCGACTAGCGGGAGCCTCCATGACGAGCAGTACTTC_TRBJ2-7	TRAC	TRAV26-1	TRAJ17	TGCATCGTCAGAGTCCGTGAAGCTGCAGGCAACAAGCTAACTTTT	TRAC	TRBV30	TRBJ2-7	TGTGCCTGGAGTTCGACTAGCGGGAGCCTCCATGACGAGCAGTACTTC	1	Blood	10309	FALSE	FALSE	FALSE
CCGGTAGAGGACATTA-1-P190604_Blood_1	clone_P190604:11050:1	P190604	P190604_TRAV9-2_TGTTATAGTGGAGGTAGCAACTATAAACTGACATTT_TRAJ53:P190604_TRBV3-1_TGTGCCAGCAGCCAAGCTGGCCAGTCTGAAGCTTTCTTT_TRBJ1-1	TRAC	TRAV9-2	TRAJ53	TGTTATAGTGGAGGTAGCAACTATAAACTGACATTT	TRAC	TRBV3-1	TRBJ1-1	TGTGCCAGCAGCCAAGCTGGCCAGTCTGAAGCTTTCTTT	1	Blood	11050	FALSE	FALSE	FALSE
CCGTACTAGTCTCCTC-1-P190604_Blood_1	clone_P190604:10775:6	P190604	P190604_TRAV8-1_TGTGCCGTGAACCATTCTGGGGGTTACCAGAAAGTTACCTTT_TRAJ13:P190604_TRBV7-2_TGTGCCAGCAGCTCCGAAGCCAATCAGCCCCAGCATTTT_TRBJ1-5	TRAC	TRAV8-1	TRAJ13	TGTGCCGTGAACCATTCTGGGGGTTACCAGAAAGTTACCTTT	TRAC	TRBV7-2	TRBJ1-5	TGTGCCAGCAGCTCCGAAGCCAATCAGCCCCAGCATTTT	6	Blood	10775	TRUE	FALSE	FALSE
CCTACACTCCCAAGAT-1-P190604_Blood_1	clone_P190604:10018:1	P190604	P190604_TRAV19_TGTGCTCTGAGTGGGAATTATGGAGGAAGCCAAGGAAATCTCATCTTT_TRAJ42:P190604_TRBV5-6_TGTGCCAGCAGCTTGAGGCAAGGCGAGCAGTACTTC_TRBJ2-7	TRAC	TRAV19	TRAJ42	TGTGCTCTGAGTGGGAATTATGGAGGAAGCCAAGGAAATCTCATCTTT	TRAC	TRBV5-6	TRBJ2-7	TGTGCCAGCAGCTTGAGGCAAGGCGAGCAGTACTTC	1	Blood	10018	FALSE	FALSE	FALSE
CCTACACTCTTTAGTC-1-P190604_Blood_1	clone_P190604:10882:6	P190604	P190604_TRAV8-4_TGTGCTGTCACTACCTCAGGAACCTACAAATACATCTTT_TRAJ40:P190604_TRBV20-1_TGCAGTGCTAGAGTGCAACGGGACGATCTGCTCGAGCAGTACTTC_TRBJ2-7	TRAC	TRAV8-4	TRAJ40	TGTGCTGTCACTACCTCAGGAACCTACAAATACATCTTT	TRAC	TRBV20-1	TRBJ2-7	TGCAGTGCTAGAGTGCAACGGGACGATCTGCTCGAGCAGTACTTC	6	Blood	10882	TRUE	FALSE	FALSE
CCTACCAGTCACACGC-1-P190604_Blood_1	clone_P190604:9389:1	P190604	P190604_TRAV1-2_TGTGCTGTGAGAGATCAATACCAGGGAGGAAAGCTTATCTTC_TRAJ23:P190604_TRBV20-1_TGCAGTGCCCCCGGACCGGGGGTAGCGGGCTCCTACGAGCAGTACTTC_TRBJ2-7	TRAC	TRAV1-2	TRAJ23	TGTGCTGTGAGAGATCAATACCAGGGAGGAAAGCTTATCTTC	TRAC	TRBV20-1	TRBJ2-7	TGCAGTGCCCCCGGACCGGGGGTAGCGGGCTCCTACGAGCAGTACTTC	1	Blood	9389	FALSE	FALSE	FALSE
CCTACCATCGTCTGCT-1-P190604_Blood_1	clone_P190604:10307:1	P190604	P190604_TRAV26-1_TGCATCGTCAGAGTAATTCAGGGAGCCCAGAAGCTGGTATTT_TRAJ54:P190604_TRBV12-4_TGTGCCAGCAGTCTCCGACATAGACACTCCTACAATGAGCAGTTCTTC_TRBJ2-1	TRAC	TRAV26-1	TRAJ54	TGCATCGTCAGAGTAATTCAGGGAGCCCAGAAGCTGGTATTT	TRAC	TRBV12-4	TRBJ2-1	TGTGCCAGCAGTCTCCGACATAGACACTCCTACAATGAGCAGTTCTTC	1	Blood	10307	FALSE	FALSE	FALSE
CCTCTGAGTGCTAGCC-1-P190604_Blood_1	clone_P190604:10138:1	P190604	P190604_TRAV21_TGTGCTGTGACTGCCGCCGCTGGAGGCTTCAAAACTATCTTT_TRAJ9:P190604_TRBV27_TGTGCCAGCGGCTTCCCTAGCAGGGACGAGCAGTACTTC_TRBJ2-7	TRAC	TRAV21	TRAJ9	TGTGCTGTGACTGCCGCCGCTGGAGGCTTCAAAACTATCTTT	TRAC	TRBV27	TRBJ2-7	TGTGCCAGCGGCTTCCCTAGCAGGGACGAGCAGTACTTC	1	Blood	10138	FALSE	FALSE	FALSE
CCTTACGCATGCATGT-1-P190604_Blood_1	clone_P190604:10795:1	P190604	P190604_TRAV8-1_TGTGCCGTGATTCTAGACTCCGGGTATGCACTCAACTTC_TRAJ41:P190604_TRBV11-2_TGTGCCAGCAGCTCGGGCACCGGCGGGGAGCAGTACTTC_TRBJ2-7	TRAC	TRAV8-1	TRAJ41	TGTGCCGTGATTCTAGACTCCGGGTATGCACTCAACTTC	TRAC	TRBV11-2	TRBJ2-7	TGTGCCAGCAGCTCGGGCACCGGCGGGGAGCAGTACTTC	1	Blood	10795	FALSE	FALSE	FALSE
CCTTCCCGTCATGCCG-1-P190604_Blood_1	clone_P190604:10865:2	P190604	P190604_TRAV8-3_TGTGCTGTGGGTGGTCTTAGGAGTACTAGCTATGGAAAGCTGACATTT_TRAJ52:P190604_TRBV24-1_TGTGCCACCAGTGACGGGGGTGCGGGAGTTGGCACAGATACGCAGTATTTT_TRBJ2-3	TRAC	TRAV8-3	TRAJ52	TGTGCTGTGGGTGGTCTTAGGAGTACTAGCTATGGAAAGCTGACATTT	TRAC	TRBV24-1	TRBJ2-3	TGTGCCACCAGTGACGGGGGTGCGGGAGTTGGCACAGATACGCAGTATTTT	2	Blood	10865	TRUE	FALSE	FALSE
CCTTCGAGTTGGGACA-1-P190604_Blood_1	clone_P190604:10200:1	P190604	P190604_TRAV22_TGTGCTGTTCCTTTCAACTTCAACAAATTTTACTTT_TRAJ21:P190604_TRBV7-9_TGTGCCAGCAGCTTCGGACAGGGGGCAGAGACCCAGTACTTC_TRBJ2-5	TRAC	TRAV22	TRAJ21	TGTGCTGTTCCTTTCAACTTCAACAAATTTTACTTT	TRAC	TRBV7-9	TRBJ2-5	TGTGCCAGCAGCTTCGGACAGGGGGCAGAGACCCAGTACTTC	1	Blood	10200	FALSE	FALSE	FALSE
CGAACATAGCGATAGC-1-P190604_Blood_1	clone_P190604:10966:1	P190604	P190604_TRAV8-6_TGTGCTGTGTCCGGAGATGACAAGATCATCTTT_TRAJ30:P190604_TRBV27_TGTGCCAGCAGTCGGGGAACTAGCGGCACCTACGAGCAGTACTTC_TRBJ2-7	TRAC	TRAV8-6	TRAJ30	TGTGCTGTGTCCGGAGATGACAAGATCATCTTT	TRAC	TRBV27	TRBJ2-7	TGTGCCAGCAGTCGGGGAACTAGCGGCACCTACGAGCAGTACTTC	1	Blood	10966	FALSE	FALSE	FALSE
CGAATGTAGGAGTCTG-1-P190604_Blood_1	clone_P190604:9595:1	P190604	P190604_TRAV12-2_TGTGCCGTGAACATGGGGACCAAGCTGGTCTTT_TRAJ47:P190604_TRBV11-2_TGTGCCAGCAGCTTAGGGGTAAAACTGTTTTTT_TRBJ1-4	TRAC	TRAV12-2	TRAJ47	TGTGCCGTGAACATGGGGACCAAGCTGGTCTTT	TRAC	TRBV11-2	TRBJ1-4	TGTGCCAGCAGCTTAGGGGTAAAACTGTTTTTT	1	Blood	9595	FALSE	FALSE	FALSE
CGAATGTCAGTATGCT-1-P190604_Blood_1	clone_P190604:10573:1	P190604	P190604_TRAV35_TGTGCTGGGAGAGAAGATACCGGCACTGCCAGTAAACTCACCTTT_TRAJ44:P190604_TRBV12-4_TGTGCCAGCAGTTTTGGACAGTTCTATGGCTACACCTTC_TRBJ1-2	TRAC	TRAV35	TRAJ44	TGTGCTGGGAGAGAAGATACCGGCACTGCCAGTAAACTCACCTTT	TRAC	TRBV12-4	TRBJ1-2	TGTGCCAGCAGTTTTGGACAGTTCTATGGCTACACCTTC	1	Blood	10573	FALSE	FALSE	FALSE
CGACCTTCATTCGACA-1-P190604_Blood_1	clone_P190604:11008:1	P190604	P190604_TRAV9-2_TGTGCTCTGAGTGATAGAGGAGGAAGCTACATACCTACATTT_TRAJ6:P190604_TRBV11-2_TGTGCCAGCAGCTTCGACAGGGGGAGTACTGAAGCTTTCTTT_TRBJ1-1	TRAC	TRAV9-2	TRAJ6	TGTGCTCTGAGTGATAGAGGAGGAAGCTACATACCTACATTT	TRAC	TRBV11-2	TRBJ1-1	TGTGCCAGCAGCTTCGACAGGGGGAGTACTGAAGCTTTCTTT	1	Blood	11008	FALSE	FALSE	FALSE
CGACTTCGTCACCTAA-1-P190604_Blood_1	clone_P190604:9459:1	P190604	P190604_TRAV1-2_TGTGCTGTGCTAAGAGATGACAAGATCATCTTT_TRAJ30:P190604_TRBV28_TGTGCCAGCAGTTTAGGGACAGGTGGGATGTCTAATGAAAAACTGTTTTTT_TRBJ1-4	TRAC	TRAV1-2	TRAJ30	TGTGCTGTGCTAAGAGATGACAAGATCATCTTT	TRAC	TRBV28	TRBJ1-4	TGTGCCAGCAGTTTAGGGACAGGTGGGATGTCTAATGAAAAACTGTTTTTT	1	Blood	9459	FALSE	FALSE	FALSE
CGAGCACAGTGTTTGC-1-P190604_Blood_1	clone_P190604:10421:60	P190604	P190604_TRAV29/DV5_TGTGCAGCAAGCGCCCATAGTGGAGGTAGCAACTATAAACTGACATTT_TRAJ53:P190604_TRBV7-9_TGTGCCACCAGATTAGGGTACGAGCAGTACTTC_TRBJ2-7	TRAC	TRAV29/DV5	TRAJ53	TGTGCAGCAAGCGCCCATAGTGGAGGTAGCAACTATAAACTGACATTT	TRAC	TRBV7-9	TRBJ2-7	TGTGCCACCAGATTAGGGTACGAGCAGTACTTC	60	Blood	10421	TRUE	FALSE	FALSE
CGAGCACCACGAAACG-1-P190604_Blood_1	clone_P190604:10943:1	P190604	P190604_TRAV8-6_TGTGCTGTGAGTAAAAACACCGACAAGCTCATCTTT_TRAJ34:P190604_TRBV27_TGTGCCAGCAGTTGGCTAGCGGGAGAGACCCAGTACTTC_TRBJ2-5	TRAC	TRAV8-6	TRAJ34	TGTGCTGTGAGTAAAAACACCGACAAGCTCATCTTT	TRAC	TRBV27	TRBJ2-5	TGTGCCAGCAGTTGGCTAGCGGGAGAGACCCAGTACTTC	1	Blood	10943	FALSE	FALSE	FALSE
CGAGCACGTCTTGCGG-1-P190604_Blood_1	clone_P190604:10778:1	P190604	P190604_TRAV8-1_TGTGCCGTGAATCCCGCTGGGGGTTACCAGAAAGTTACCTTT_TRAJ13:P190604_TRBV20-1_TGCAGTGCTAGAGATACAGGGTCAGGAAACACCATATATTTT_TRBJ1-3	TRAC	TRAV8-1	TRAJ13	TGTGCCGTGAATCCCGCTGGGGGTTACCAGAAAGTTACCTTT	TRAC	TRBV20-1	TRBJ1-3	TGCAGTGCTAGAGATACAGGGTCAGGAAACACCATATATTTT	1	Blood	10778	FALSE	FALSE	FALSE
CGAGCACTCTGTGCAA-1-P190604_Blood_1	clone_P190604:9515:1	P190604	P190604_TRAV12-1_TGTGTGGTGAACACCGGCCCCGGCACTGCCAGTAAACTCACCTTT_TRAJ44:P190604_TRBV20-1_TGCAGTGCTAGAGGCATCCTGGCCCAGGAGACCCAGTACTTC_TRBJ2-5	TRAC	TRAV12-1	TRAJ44	TGTGTGGTGAACACCGGCCCCGGCACTGCCAGTAAACTCACCTTT	TRAC	TRBV20-1	TRBJ2-5	TGCAGTGCTAGAGGCATCCTGGCCCAGGAGACCCAGTACTTC	1	Blood	9515	FALSE	FALSE	FALSE
CGATCGGCACAACTGT-1-P190604_Blood_1	clone_P190604:9533:1	P190604	P190604_TRAV12-1_TGTGTGGTGAACCTATCGCAA_TRAJ27:P190604_TRBV20-1_TGCAGTGCTAGAGTGGCTAGCGGGCTCCAAGGATCCTACAATGAGCAGTTCTTC_TRBJ2-1	TRAC	TRAV12-1	TRAJ27	TGTGTGGTGAACCTATCGCAA	TRAC	TRBV20-1	TRBJ2-1	TGCAGTGCTAGAGTGGCTAGCGGGCTCCAAGGATCCTACAATGAGCAGTTCTTC	1	Blood	9533	FALSE	FALSE	FALSE
CGATCGGGTGACCAAG-1-P190604_Blood_1	clone_P190604:10641:1	P190604	P190604_TRAV38-2/DV8_TGTGCTTATAGGTTAGATAACAATGACATGCGCTTT_TRAJ43:P190604_TRBV7-9_TGTGCCAGCAGCTCCTACACAGATACGCAGTATTTT_TRBJ2-3	TRAC	TRAV38-2/DV8	TRAJ43	TGTGCTTATAGGTTAGATAACAATGACATGCGCTTT	TRAC	TRBV7-9	TRBJ2-3	TGTGCCAGCAGCTCCTACACAGATACGCAGTATTTT	1	Blood	10641	FALSE	FALSE	FALSE
CGATTGAAGACTTGAA-1-P190604_Blood_1	clone_P190604:10146:1	P190604	P190604_TRAV21_TGTGCTGTGAGGCCCAAAGGCAACTTCAACAAATTTTACTTT_TRAJ21:P190604_TRBV19_TGTGCCAGTACCAGGGCGGACGGTTCCTACGAGCAGTACTTC_TRBJ2-7	TRAC	TRAV21	TRAJ21	TGTGCTGTGAGGCCCAAAGGCAACTTCAACAAATTTTACTTT	TRAC	TRBV19	TRBJ2-7	TGTGCCAGTACCAGGGCGGACGGTTCCTACGAGCAGTACTTC	1	Blood	10146	FALSE	FALSE	FALSE
CGCCAAGCAACAACCT-1-P190604_Blood_1	clone_P190604:9503:1	P190604	P190604_TRAV12-1_TGTGTGGCTCATAATGCAGGCAACATGCTCACCTTT_TRAJ39:P190604_TRBV20-1_TGCAGTGCTACTATTCCGGGGCATTATAGCAATCAGCCCCAGCATTTT_TRBJ1-5	TRAC	TRAV12-1	TRAJ39	TGTGTGGCTCATAATGCAGGCAACATGCTCACCTTT	TRAC	TRBV20-1	TRBJ1-5	TGCAGTGCTACTATTCCGGGGCATTATAGCAATCAGCCCCAGCATTTT	1	Blood	9503	FALSE	FALSE	FALSE
CGCCAAGCATTGTGCA-1-P190604_Blood_1	clone_P190604:10816:1	P190604	P190604_TRAV8-2_TGTGTTGTGAGTGGGAGCTTTGGAAATGAGAAATTAACCTTT_TRAJ48:P190604_TRBV11-2_TGTGCCAGCAGCTTCGGGAGCAGGGTACGCATCTACGAGCAGTACTTC_TRBJ2-7	TRAC	TRAV8-2	TRAJ48	TGTGTTGTGAGTGGGAGCTTTGGAAATGAGAAATTAACCTTT	TRAC	TRBV11-2	TRBJ2-7	TGTGCCAGCAGCTTCGGGAGCAGGGTACGCATCTACGAGCAGTACTTC	1	Blood	10816	FALSE	FALSE	FALSE
CGCGTTTAGCAGATCG-1-P190604_Blood_1	clone_P190604:10098:1	P190604	P190604_TRAV20_TGTGCTGTGCGGGCTTACGGTCAGAATTTTGTCTTT_TRAJ26:P190604_TRBV20-1_TGCAGTGCTAGTGCAAATGAGCAGTTCTTC_TRBJ2-1	TRAC	TRAV20	TRAJ26	TGTGCTGTGCGGGCTTACGGTCAGAATTTTGTCTTT	TRAC	TRBV20-1	TRBJ2-1	TGCAGTGCTAGTGCAAATGAGCAGTTCTTC	1	Blood	10098	FALSE	FALSE	FALSE
CGCGTTTGTTGGTTTG-1-P190604_Blood_1	clone_P190604:10227:1	P190604	P190604_TRAV23/DV6_TGTGCAGCACAACGAGGTTCTAACGACTACAAGCTCAGCTTT_TRAJ20:P190604_TRBV6-2_TGTGCCAGCAGTTTTACAGGGTCCGGGGCCAACGTCCTGACTTTC_TRBJ2-6	TRAC	TRAV23/DV6	TRAJ20	TGTGCAGCACAACGAGGTTCTAACGACTACAAGCTCAGCTTT	TRAC	TRBV6-2	TRBJ2-6	TGTGCCAGCAGTTTTACAGGGTCCGGGGCCAACGTCCTGACTTTC	1	Blood	10227	FALSE	FALSE	FALSE
CGCTGGAAGCCCTAAT-1-P190604_Blood_1	clone_P190604:10007:1	P190604	P190604_TRAV19_TGTGCTCTGAGTGAGGCTGGCAACTATCAGTTAATCTGG_TRAJ33:P190604_TRBV7-2_TGTGCCAGCAGCGAGGGACTCGTCGCCTCAAGAAGCACAGATACGCAGTATTTT_TRBJ2-3	TRAC	TRAV19	TRAJ33	TGTGCTCTGAGTGAGGCTGGCAACTATCAGTTAATCTGG	TRAC	TRBV7-2	TRBJ2-3	TGTGCCAGCAGCGAGGGACTCGTCGCCTCAAGAAGCACAGATACGCAGTATTTT	1	Blood	10007	FALSE	FALSE	FALSE
CGCTGGACATGCTGGC-1-P190604_Blood_1	clone_P190604:9821:1	P190604	P190604_TRAV14/DV4_TGTGCAATGAGAGAGGATAATGCTGGCAACAACCGTAAGCTGATTTGG_TRAJ38:P190604_TRBV18_TGTGCCAGCTCACTAGGACAGTACGAGCAGTACTTC_TRBJ2-7	TRAC	TRAV14/DV4	TRAJ38	TGTGCAATGAGAGAGGATAATGCTGGCAACAACCGTAAGCTGATTTGG	TRAC	TRBV18	TRBJ2-7	TGTGCCAGCTCACTAGGACAGTACGAGCAGTACTTC	1	Blood	9821	FALSE	FALSE	FALSE
CGCTGGATCACAGGCC-1-P190604_Blood_1	clone_P190604:10421:60	P190604	P190604_TRAV29/DV5_TGTGCAGCAAGCGCCCATAGTGGAGGTAGCAACTATAAACTGACATTT_TRAJ53:P190604_TRBV7-9_TGTGCCACCAGATTAGGGTACGAGCAGTACTTC_TRBJ2-7	TRAC	TRAV29/DV5	TRAJ53	TGTGCAGCAAGCGCCCATAGTGGAGGTAGCAACTATAAACTGACATTT	TRAC	TRBV7-9	TRBJ2-7	TGTGCCACCAGATTAGGGTACGAGCAGTACTTC	60	Blood	10421	TRUE	FALSE	FALSE
CGGACACTCACCAGGC-1-P190604_Blood_1	clone_P190604:10427:4	P190604	P190604_TRAV29/DV5_TGTGCAGCAAGCGCGAGAACAGGAGGAGGTGCTGACGGACTCACCTTT_TRAJ45:P190604_TRBV9_TGTGCCAGCAGCGGGAGCGGGATTTTAGGCAATGAGCAGTTCTTC_TRBJ2-1	TRAC	TRAV29/DV5	TRAJ45	TGTGCAGCAAGCGCGAGAACAGGAGGAGGTGCTGACGGACTCACCTTT	TRAC	TRBV9	TRBJ2-1	TGTGCCAGCAGCGGGAGCGGGATTTTAGGCAATGAGCAGTTCTTC	4	Blood	10427	TRUE	FALSE	FALSE
CGGACACTCATACGGT-1-P190604_Blood_1	clone_P190604:9750:1	P190604	P190604_TRAV13-1_TGTGCAGCAGGAGGCTTCAAAACTATCTTT_TRAJ9:P190604_TRBV19_TGTGCCAGTAGTCCCTACGTTGGAGGGCTGAATAATGAAAAACTGTTTTTT_TRBJ1-4	TRAC	TRAV13-1	TRAJ9	TGTGCAGCAGGAGGCTTCAAAACTATCTTT	TRAC	TRBV19	TRBJ1-4	TGTGCCAGTAGTCCCTACGTTGGAGGGCTGAATAATGAAAAACTGTTTTTT	1	Blood	9750	FALSE	FALSE	FALSE
CGGACTGAGTCACGCC-1-P190604_Blood_1	clone_P190604:9929:1	P190604	P190604_TRAV17_TGTGCTACGGACTGGGGTTATGGAGGAAGCCAAGGAAATCTCATCTTT_TRAJ42:P190604_TRBV5-5_TGTGCCAGCAGCTCCGGGCCGCCGGGCCTACAGCCCCAGCATTTT_TRBJ1-5	TRAC	TRAV17	TRAJ42	TGTGCTACGGACTGGGGTTATGGAGGAAGCCAAGGAAATCTCATCTTT	TRAC	TRBV5-5	TRBJ1-5	TGTGCCAGCAGCTCCGGGCCGCCGGGCCTACAGCCCCAGCATTTT	1	Blood	9929	FALSE	FALSE	FALSE
CGGAGCTTCGATAGAA-1-P190604_Blood_1	clone_P190604:10978:1	P190604	P190604_TRAV9-2_TGTGCTCTGAAGGATAACTATGGTCAGAATTTTGTCTTT_TRAJ26:P190604_TRBV2_TGTGCCAGCAGTGAGTCGCGAGGGCGGCAAGAGACCCAGTACTTC_TRBJ2-5	TRAC	TRAV9-2	TRAJ26	TGTGCTCTGAAGGATAACTATGGTCAGAATTTTGTCTTT	TRAC	TRBV2	TRBJ2-5	TGTGCCAGCAGTGAGTCGCGAGGGCGGCAAGAGACCCAGTACTTC	1	Blood	10978	FALSE	FALSE	FALSE
CGGAGTCGTCTCTCTG-1-P190604_Blood_1	clone_P190604:9768:7	P190604	P190604_TRAV13-2_TGTGCAGAGAAAGTTTCTGGTGGCTACAATAAGCTGATTTTT_TRAJ4:P190604_TRBV5-1_TGCGCCAGCAGCATTAATCTAGCGGGAGGTAGTGAGCAGTTCTTC_TRBJ2-1	TRAC	TRAV13-2	TRAJ4	TGTGCAGAGAAAGTTTCTGGTGGCTACAATAAGCTGATTTTT	TRAC	TRBV5-1	TRBJ2-1	TGCGCCAGCAGCATTAATCTAGCGGGAGGTAGTGAGCAGTTCTTC	7	Blood	9768	TRUE	FALSE	FALSE
CGTAGCGTCACCCGAG-1-P190604_Blood_1	clone_P190604:9715:1	P190604	P190604_TRAV13-1_TGTGCAGCAAGTAGAAAACAGAATTTTGTCTTT_TRAJ26:P190604_TRBV12-3_TGTGCCAGCAGTACAGGACCGAGCACAGATACGCAGTATTTT_TRBJ2-3	TRAC	TRAV13-1	TRAJ26	TGTGCAGCAAGTAGAAAACAGAATTTTGTCTTT	TRAC	TRBV12-3	TRBJ2-3	TGTGCCAGCAGTACAGGACCGAGCACAGATACGCAGTATTTT	1	Blood	9715	FALSE	FALSE	FALSE
CGTCACTCATGGTTGT-1-P190604_Blood_1	clone_P190604:10185:1	P190604	P190604_TRAV22_TGTGCTGGCACATCAGGAGGAAGCTACATACCTACATTT_TRAJ6:P190604_TRBV30_TGTGCCTGGAGTGCGGGACTAGCAGGGGCCGGGGAGCTGTTTTTT_TRBJ2-2	TRAC	TRAV22	TRAJ6	TGTGCTGGCACATCAGGAGGAAGCTACATACCTACATTT	TRAC	TRBV30	TRBJ2-2	TGTGCCTGGAGTGCGGGACTAGCAGGGGCCGGGGAGCTGTTTTTT	1	Blood	10185	FALSE	FALSE	FALSE
CGTCACTTCCTTGGTC-1-P190604_Blood_1	clone_P190604:10159:1	P190604	P190604_TRAV21_TGTGCTGTGATCGGGAGTACGACCTCAGGAACCTACAAATACATCTTT_TRAJ40:P190604_TRBV7-9_TGTGCCAGCAGCTTCAGATTCGATGAGCAGTTCTTC_TRBJ2-1	TRAC	TRAV21	TRAJ40	TGTGCTGTGATCGGGAGTACGACCTCAGGAACCTACAAATACATCTTT	TRAC	TRBV7-9	TRBJ2-1	TGTGCCAGCAGCTTCAGATTCGATGAGCAGTTCTTC	1	Blood	10159	FALSE	FALSE	FALSE
CGTCTACGTATAGTAG-1-P190604_Blood_1	clone_P190604:10318:1	P190604	P190604_TRAV26-1_TGCATCGTCAGAGTCGGGGGCGGATCTGAAAAGCTGGTCTTT_TRAJ57:P190604_TRBV9_TGTGCCAGCAGCGTAGGTGACAGTAACACTGAAGCTTTCTTT_TRBJ1-1	TRAC	TRAV26-1	TRAJ57	TGCATCGTCAGAGTCGGGGGCGGATCTGAAAAGCTGGTCTTT	TRAC	TRBV9	TRBJ1-1	TGTGCCAGCAGCGTAGGTGACAGTAACACTGAAGCTTTCTTT	1	Blood	10318	FALSE	FALSE	FALSE
CGTGAGCCACGTGAGA-1-P190604_Blood_1	clone_P190604:10270:1	P190604	P190604_TRAV25_TGTGCAGGGAATAATGCTGGCAACAACCGTAAGCTGATTTGG_TRAJ38:P190604_TRBV5-4_TGTGCCAGCACCCGAGACAGGGGCACTGAAGCTTTCTTT_TRBJ1-1	TRAC	TRAV25	TRAJ38	TGTGCAGGGAATAATGCTGGCAACAACCGTAAGCTGATTTGG	TRAC	TRBV5-4	TRBJ1-1	TGTGCCAGCACCCGAGACAGGGGCACTGAAGCTTTCTTT	1	Blood	10270	FALSE	FALSE	FALSE
CGTGAGCGTGTTCGAT-1-P190604_Blood_1	clone_P190604:9613:1	P190604	P190604_TRAV12-2_TGTGCCGTGAACTACTATGGAGGAAGCCAAGGAAATCTCATCTTT_TRAJ42:P190604_TRBV25-1_TGTGCCAGCAGGGGACTAGCGGGAGGACCCGGCCTCAATGAGCAGTTCTTC_TRBJ2-1	TRAC	TRAV12-2	TRAJ42	TGTGCCGTGAACTACTATGGAGGAAGCCAAGGAAATCTCATCTTT	TRAC	TRBV25-1	TRBJ2-1	TGTGCCAGCAGGGGACTAGCGGGAGGACCCGGCCTCAATGAGCAGTTCTTC	1	Blood	9613	FALSE	FALSE	FALSE
CGTGAGCTCCTATTCA-1-P190604_Blood_1	clone_P190604:10888:1	P190604	P190604_TRAV8-4_TGTGCTGTGACCCGTACCTCAGGAACCTACAAATACATCTTT_TRAJ40:P190604_TRBV7-9_TGTGCCAGCAGCCTGGGGTACGAGCAGTACTTC_TRBJ2-7	TRAC	TRAV8-4	TRAJ40	TGTGCTGTGACCCGTACCTCAGGAACCTACAAATACATCTTT	TRAC	TRBV7-9	TRBJ2-7	TGTGCCAGCAGCCTGGGGTACGAGCAGTACTTC	1	Blood	10888	FALSE	FALSE	FALSE
CGTGTAAGTTAGAACA-1-P190604_Blood_1	clone_P190604:10461:8	P190604	P190604_TRAV29/DV5_TGTGCAGCAGAAGGAGGAGGTGCTGACGGACTCACCTTT_TRAJ45:P190604_TRBV7-8_TGTGCCAGCAGCTTAGTTCCGGAGCGGTCCTCCTACGAGCAGTACTTC_TRBJ2-7	TRAC	TRAV29/DV5	TRAJ45	TGTGCAGCAGAAGGAGGAGGTGCTGACGGACTCACCTTT	TRAC	TRBV7-8	TRBJ2-7	TGTGCCAGCAGCTTAGTTCCGGAGCGGTCCTCCTACGAGCAGTACTTC	8	Blood	10461	TRUE	FALSE	FALSE
CGTGTAATCTTGTATC-1-P190604_Blood_1	clone_P190604:9765:1	P190604	P190604_TRAV13-2_TGTGCAGAAGGAGGAAGCTACATACCTACATTT_TRAJ6:P190604_TRBV12-3_TGTGCCAGCAGTTTGGGGCAGATTCAGCAGTACTTC_TRBJ2-7	TRAC	TRAV13-2	TRAJ6	TGTGCAGAAGGAGGAAGCTACATACCTACATTT	TRAC	TRBV12-3	TRBJ2-7	TGTGCCAGCAGTTTGGGGCAGATTCAGCAGTACTTC	1	Blood	9765	FALSE	FALSE	FALSE
CGTGTCTCAGTAGAGC-1-P190604_Blood_1	clone_P190604:11046:1	P190604	P190604_TRAV9-2_TGTGCTCTTAACACCAATGCAGGCAAATCAACCTTT_TRAJ27:P190604_TRBV6-5_TGTGCCAGCAGTTTAGCGGGGGGGGCCTACAATGATGAGCAGTTCTTC_TRBJ2-1	TRAC	TRAV9-2	TRAJ27	TGTGCTCTTAACACCAATGCAGGCAAATCAACCTTT	TRAC	TRBV6-5	TRBJ2-1	TGTGCCAGCAGTTTAGCGGGGGGGGCCTACAATGATGAGCAGTTCTTC	1	Blood	11046	FALSE	FALSE	FALSE
CGTGTCTGTCTCAACA-1-P190604_Blood_1	clone_P190604:10372:1	P190604	P190604_TRAV27_TGTGCAGGAGCAGGGACCGGTAACCAGTTCTATTTT_TRAJ49:P190604_TRBV4-1_TGCGCCAGCAGCCGGGACAGGGGTAAAAATCAGCCCCAGCATTTT_TRBJ1-5	TRAC	TRAV27	TRAJ49	TGTGCAGGAGCAGGGACCGGTAACCAGTTCTATTTT	TRAC	TRBV4-1	TRBJ1-5	TGCGCCAGCAGCCGGGACAGGGGTAAAAATCAGCCCCAGCATTTT	1	Blood	10372	FALSE	FALSE	FALSE
CGTTAGATCTTACCTA-1-P190604_Blood_1	clone_P190604:11041:1	P190604	P190604_TRAV9-2_TGTGCTCTGGTAAATACTGGAGGCTTCAAAACTATCTTT_TRAJ9:P190604_TRBV6-2_TGTGCCAGCAGTTCCGGGACACCGGGCTCCTACGAGCAGTACTTC_TRBJ2-7	TRAC	TRAV9-2	TRAJ9	TGTGCTCTGGTAAATACTGGAGGCTTCAAAACTATCTTT	TRAC	TRBV6-2	TRBJ2-7	TGTGCCAGCAGTTCCGGGACACCGGGCTCCTACGAGCAGTACTTC	1	Blood	11041	FALSE	FALSE	FALSE
CGTTCTGAGGATCGCA-1-P190604_Blood_1	clone_P190604:9519:1	P190604	P190604_TRAV12-1_TGTGTGGTGAACATAGAAGCTAGTGGAGGTAGCAACTATAAACTGACATTT_TRAJ53:P190604_TRBV24-1_TGTGCCACCAGTGATGGGCGGGAGAGCACCGGGGAGCTGTTTTTT_TRBJ2-2	TRAC	TRAV12-1	TRAJ53	TGTGTGGTGAACATAGAAGCTAGTGGAGGTAGCAACTATAAACTGACATTT	TRAC	TRBV24-1	TRBJ2-2	TGTGCCACCAGTGATGGGCGGGAGAGCACCGGGGAGCTGTTTTTT	1	Blood	9519	FALSE	FALSE	FALSE
CGTTGGGGTCTGCCAG-1-P190604_Blood_1	clone_P190604:10607:1	P190604	P190604_TRAV38-1_TGTGCTTTCATGAACTTAAATACCGGCACTGCCAGTAAACTCACCTTT_TRAJ44:P190604_TRBV11-2_TGTGCCAGCAGCTTAGCAGGGTGGGGAAACACCATATATTTT_TRBJ1-3	TRAC	TRAV38-1	TRAJ44	TGTGCTTTCATGAACTTAAATACCGGCACTGCCAGTAAACTCACCTTT	TRAC	TRBV11-2	TRBJ1-3	TGTGCCAGCAGCTTAGCAGGGTGGGGAAACACCATATATTTT	1	Blood	10607	FALSE	FALSE	FALSE
CTACCCAGTCAATACC-1-P190604_Blood_1	clone_P190604:9490:1	P190604	P190604_TRAV10_TGTGTGGTGAGCCCCTCAGGAACCTACAAATACATCTTT_TRAJ40:P190604_TRBV10-3_TGTGCCATCAGCGCCTTTGGGGGACTAGCGGGAAAGAGGTCGGGCACAGATACGCAGTATTTT_TRBJ2-3	TRAC	TRAV10	TRAJ40	TGTGTGGTGAGCCCCTCAGGAACCTACAAATACATCTTT	TRAC	TRBV10-3	TRBJ2-3	TGTGCCATCAGCGCCTTTGGGGGACTAGCGGGAAAGAGGTCGGGCACAGATACGCAGTATTTT	1	Blood	9490	FALSE	FALSE	FALSE
CTACGTCAGGCTACGA-1-P190604_Blood_1	clone_P190604:10712:1	P190604	P190604_TRAV41_TGTGCTGTCATCCCTAAGCCCCCCTCTACTGGAGCCAATAGTAAGCTGACATTT_TRAJ56:P190604_TRBV5-1_TGCGCCAGCAGCTTGTTCGGGACAGGTAACAATGAGCAGTTCTTC_TRBJ2-1	TRAC	TRAV41	TRAJ56	TGTGCTGTCATCCCTAAGCCCCCCTCTACTGGAGCCAATAGTAAGCTGACATTT	TRAC	TRBV5-1	TRBJ2-1	TGCGCCAGCAGCTTGTTCGGGACAGGTAACAATGAGCAGTTCTTC	1	Blood	10712	FALSE	FALSE	FALSE
CTAGCCTGTAAATGAC-1-P190604_Blood_1	clone_P190604:10602:1	P190604	P190604_TRAV36/DV7_TGTGCTGTTCAGGGCGGATCTGAAAAGCTGGTCTTT_TRAJ57:P190604_TRBV2_TGTGCCAGCAGTTTACAGGGTATTCCCATGGATACGCAGTATTTT_TRBJ2-3	TRAC	TRAV36/DV7	TRAJ57	TGTGCTGTTCAGGGCGGATCTGAAAAGCTGGTCTTT	TRAC	TRBV2	TRBJ2-3	TGTGCCAGCAGTTTACAGGGTATTCCCATGGATACGCAGTATTTT	1	Blood	10602	FALSE	FALSE	FALSE
CTAGTGAGTACTTCTT-1-P190604_Blood_1	clone_P190604:9842:1	P190604	P190604_TRAV14/DV4_TGTGCAATGAGAGAGGGTATGGATAGCAACTATCAGTTAATCTGG_TRAJ33:P190604_TRBV28_TGTGCCAGCAGTTTCGGCCCGGGACTTACGAACGAGCAGTACTTC_TRBJ2-7	TRAC	TRAV14/DV4	TRAJ33	TGTGCAATGAGAGAGGGTATGGATAGCAACTATCAGTTAATCTGG	TRAC	TRBV28	TRBJ2-7	TGTGCCAGCAGTTTCGGCCCGGGACTTACGAACGAGCAGTACTTC	1	Blood	9842	FALSE	FALSE	FALSE
CTCGGAGCAGCTGCAC-1-P190604_Blood_1	clone_P190604:10055:1	P190604	P190604_TRAV2_TGTGCTGTGGAGGGATCTAGCAACACAGGCAAACTAATCTTT_TRAJ37:P190604_TRBV5-1_TGCGCCAGCAGCTTAGTCGCAGGGGGTGGGGACGAGCAGTACTTC_TRBJ2-7	TRAC	TRAV2	TRAJ37	TGTGCTGTGGAGGGATCTAGCAACACAGGCAAACTAATCTTT	TRAC	TRBV5-1	TRBJ2-7	TGCGCCAGCAGCTTAGTCGCAGGGGGTGGGGACGAGCAGTACTTC	1	Blood	10055	FALSE	FALSE	FALSE
CTCGGAGTCGGCGCAT-1-P190604_Blood_1	clone_P190604:10037:1	P190604	P190604_TRAV2_TGTGCTGTGGAAGGGGCTGCAGGCAACAAGCTAACTTTT_TRAJ17:P190604_TRBV30_TGTGCCTGGAGTGTAGGGGGATATAGCAATCAGCCCCAGCATTTT_TRBJ1-5	TRAC	TRAV2	TRAJ17	TGTGCTGTGGAAGGGGCTGCAGGCAACAAGCTAACTTTT	TRAC	TRBV30	TRBJ1-5	TGTGCCTGGAGTGTAGGGGGATATAGCAATCAGCCCCAGCATTTT	1	Blood	10037	FALSE	FALSE	FALSE
CTCGGGATCCCTGACT-1-P190604_Blood_1	clone_P190604:10437:1	P190604	P190604_TRAV29/DV5_TGTGCAGCAAGCGCGGCTGGCTTTGGGAATGTGCTGCATTGC_TRAJ35:P190604_TRBV7-8_TGTGCCAGCATAGAAACCTCGGGACTAGCAAGCAATGAGCAGTTCTTC_TRBJ2-1	TRAC	TRAV29/DV5	TRAJ35	TGTGCAGCAAGCGCGGCTGGCTTTGGGAATGTGCTGCATTGC	TRAC	TRBV7-8	TRBJ2-1	TGTGCCAGCATAGAAACCTCGGGACTAGCAAGCAATGAGCAGTTCTTC	1	Blood	10437	FALSE	FALSE	FALSE
CTCGTACGTAGCGCAA-1-P190604_Blood_1	clone_P190604:10421:60	P190604	P190604_TRAV29/DV5_TGTGCAGCAAGCGCCCATAGTGGAGGTAGCAACTATAAACTGACATTT_TRAJ53:P190604_TRBV7-9_TGTGCCACCAGATTAGGGTACGAGCAGTACTTC_TRBJ2-7	TRAC	TRAV29/DV5	TRAJ53	TGTGCAGCAAGCGCCCATAGTGGAGGTAGCAACTATAAACTGACATTT	TRAC	TRBV7-9	TRBJ2-7	TGTGCCACCAGATTAGGGTACGAGCAGTACTTC	60	Blood	10421	TRUE	FALSE	FALSE
CTCGTACTCAAGCCTA-1-P190604_Blood_1	clone_P190604:10576:1	P190604	P190604_TRAV35_TGTGCTGGGCAGAAGGCCAGACTCATGTTT_TRAJ31:P190604_TRBV15_TGTGCCACCAGCAGAGGGGCCTCACAGGGGGCCCACGAGCAGTACTTC_TRBJ2-7	TRAC	TRAV35	TRAJ31	TGTGCTGGGCAGAAGGCCAGACTCATGTTT	TRAC	TRBV15	TRBJ2-7	TGTGCCACCAGCAGAGGGGCCTCACAGGGGGCCCACGAGCAGTACTTC	1	Blood	10576	FALSE	FALSE	FALSE
CTCGTCATCAACACGT-1-P190604_Blood_1	clone_P190604:10062:1	P190604	P190604_TRAV2_TGTGCTGTTAAGTTTTCTGGTGGCTACAATAAGCTGATTTTT_TRAJ4:P190604_TRBV7-9_TGTGCCAGCAGCTTAGGAGGTTTTAGGGACAGGGGCGACCTGAACACTGAAGCTTTCTTT_TRBJ1-1	TRAC	TRAV2	TRAJ4	TGTGCTGTTAAGTTTTCTGGTGGCTACAATAAGCTGATTTTT	TRAC	TRBV7-9	TRBJ1-1	TGTGCCAGCAGCTTAGGAGGTTTTAGGGACAGGGGCGACCTGAACACTGAAGCTTTCTTT	1	Blood	10062	FALSE	FALSE	FALSE
CTCTACGGTAAACACA-1-P190604_Blood_1	clone_P190604:9522:1	P190604	P190604_TRAV12-1_TGTGTGGTGAACATCGGGACTGGAGGCTTCAAAACTATCTTT_TRAJ9:P190604_TRBV4-1_TGCGCCAGCAGCCAGGAACCTAGCGGGGGTGGCACAGATACGCAGTATTTT_TRBJ2-3	TRAC	TRAV12-1	TRAJ9	TGTGTGGTGAACATCGGGACTGGAGGCTTCAAAACTATCTTT	TRAC	TRBV4-1	TRBJ2-3	TGCGCCAGCAGCCAGGAACCTAGCGGGGGTGGCACAGATACGCAGTATTTT	1	Blood	9522	FALSE	FALSE	FALSE
CTGATCCTCTGGGCCA-1-P190604_Blood_1	clone_P190604:10710:1	P190604	P190604_TRAV41_TGTGCTGTCAGCCCCTCCTTGAATTATGGAGGAAGCCAAGGAAATCTCATCTTT_TRAJ42:P190604_TRBV5-4_TGTGCCAGCAGCAAAGGGGGCTTATTTAATGAGCAGTTCTTC_TRBJ2-1	TRAC	TRAV41	TRAJ42	TGTGCTGTCAGCCCCTCCTTGAATTATGGAGGAAGCCAAGGAAATCTCATCTTT	TRAC	TRBV5-4	TRBJ2-1	TGTGCCAGCAGCAAAGGGGGCTTATTTAATGAGCAGTTCTTC	1	Blood	10710	FALSE	FALSE	FALSE
CTGCCTAAGGCAATTA-1-P190604_Blood_1	clone_P190604:9799:1	P190604	P190604_TRAV13-2_TGTGCAGAGATGAATTATGGAGGAAGCCAAGGAAATCTCATCTTT_TRAJ42:P190604_TRBV9_TGTGCCAGCAGCCCCGGGAGGGGTTATGGCTACACCTTC_TRBJ1-2	TRAC	TRAV13-2	TRAJ42	TGTGCAGAGATGAATTATGGAGGAAGCCAAGGAAATCTCATCTTT	TRAC	TRBV9	TRBJ1-2	TGTGCCAGCAGCCCCGGGAGGGGTTATGGCTACACCTTC	1	Blood	9799	FALSE	FALSE	FALSE
CTGCCTATCTACGAGT-1-P190604_Blood_1	clone_P190604:9925:1	P190604	P190604_TRAV17_TGTGCTACGGACGGCAATAACAATGACATGCGCTTT_TRAJ43:P190604_TRBV10-3_TGTGCCACCTATTCGGGGGGGGGGAACAATGAGCAGTTCTTC_TRBJ2-1	TRAC	TRAV17	TRAJ43	TGTGCTACGGACGGCAATAACAATGACATGCGCTTT	TRAC	TRBV10-3	TRBJ2-1	TGTGCCACCTATTCGGGGGGGGGGAACAATGAGCAGTTCTTC	1	Blood	9925	FALSE	FALSE	FALSE
CTGCTGTAGCGTTCCG-1-P190604_Blood_1	clone_P190604:10679:1	P190604	P190604_TRAV4_TGCCTCGTGGGTGACATGGATGGAGGCTTCAAAACTATCTTT_TRAJ9:P190604_TRBV5-1_TGCGCCAGCAGCTCCGGACTAGCGGGAGCGGTAGATACGCAGTATTTT_TRBJ2-3	TRAC	TRAV4	TRAJ9	TGCCTCGTGGGTGACATGGATGGAGGCTTCAAAACTATCTTT	TRAC	TRBV5-1	TRBJ2-3	TGCGCCAGCAGCTCCGGACTAGCGGGAGCGGTAGATACGCAGTATTTT	1	Blood	10679	FALSE	FALSE	FALSE
CTGGTCTCAGCTCGCA-1-P190604_Blood_1	clone_P190604:10421:60	P190604	P190604_TRAV29/DV5_TGTGCAGCAAGCGCCCATAGTGGAGGTAGCAACTATAAACTGACATTT_TRAJ53:P190604_TRBV7-9_TGTGCCACCAGATTAGGGTACGAGCAGTACTTC_TRBJ2-7	TRAC	TRAV29/DV5	TRAJ53	TGTGCAGCAAGCGCCCATAGTGGAGGTAGCAACTATAAACTGACATTT	TRAC	TRBV7-9	TRBJ2-7	TGTGCCACCAGATTAGGGTACGAGCAGTACTTC	60	Blood	10421	TRUE	FALSE	FALSE
CTGTGCTCAAGCTGTT-1-P190604_Blood_1	clone_P190604:10901:8	P190604	P190604_TRAV8-4_TGTGCTGTGAGTCCTGCTAACCAGGGAGGAAAGCTTATCTTC_TRAJ23:P190604_TRBV20-1_TGCAGTGCTCGGACTAGCGGTACCTACTACGAGCAGTACTTC_TRBJ2-7	TRAC	TRAV8-4	TRAJ23	TGTGCTGTGAGTCCTGCTAACCAGGGAGGAAAGCTTATCTTC	TRAC	TRBV20-1	TRBJ2-7	TGCAGTGCTCGGACTAGCGGTACCTACTACGAGCAGTACTTC	8	Blood	10901	TRUE	FALSE	FALSE
CTGTGCTCAGCCTTTC-1-P190604_Blood_1	clone_P190604:9907:1	P190604	P190604_TRAV17_TGTGCTACGGACGAGGCCTCAGGAACCTACAAATACATCTTT_TRAJ40:P190604_TRBV18_TGTGCCAGCTCCCCCACCTTTTCCTACAGCTCTGGGGCCAACGTCCTGACTTTC_TRBJ2-6	TRAC	TRAV17	TRAJ40	TGTGCTACGGACGAGGCCTCAGGAACCTACAAATACATCTTT	TRAC	TRBV18	TRBJ2-6	TGTGCCAGCTCCCCCACCTTTTCCTACAGCTCTGGGGCCAACGTCCTGACTTTC	1	Blood	9907	FALSE	FALSE	FALSE
CTGTTTATCTGCTTGC-1-P190604_Blood_1	clone_P190604:10121:1	P190604	P190604_TRAV21_TGTGCTGTCATGGAATATGGAAACAAGCTGGTCTTT_TRAJ47:P190604_TRBV19_TGTGCCAGTAGTATAAGTCCTAGCGAGGCCGGCGGGAGCTATGGCTACACCTTC_TRBJ1-2	TRAC	TRAV21	TRAJ47	TGTGCTGTCATGGAATATGGAAACAAGCTGGTCTTT	TRAC	TRBV19	TRBJ1-2	TGTGCCAGTAGTATAAGTCCTAGCGAGGCCGGCGGGAGCTATGGCTACACCTTC	1	Blood	10121	FALSE	FALSE	FALSE
CTTACCGGTAACGTTC-1-P190604_Blood_1	clone_P190604:10286:7	P190604	P190604_TRAV25_TGTGCTGAGAACAGAGATGACAAGATCATCTTT_TRAJ30:P190604_TRBV3-1_TGTGCCAGCAGCCAAGAGGCATTGACAGGGGATAGAGGCTACACCTTC_TRBJ1-2	TRAC	TRAV25	TRAJ30	TGTGCTGAGAACAGAGATGACAAGATCATCTTT	TRAC	TRBV3-1	TRBJ1-2	TGTGCCAGCAGCCAAGAGGCATTGACAGGGGATAGAGGCTACACCTTC	7	Blood	10286	TRUE	FALSE	FALSE
CTTACCGTCCTTTCTC-1-P190604_Blood_1	clone_P190604:10453:1	P190604	P190604_TRAV29/DV5_TGTGCAGCAAGCTTATACAACTTCAACAAATTTTACTTT_TRAJ21:P190604_TRBV28_TGTGCCAGCAGTTTTGAAGGTCTACCCCTTCGATTC_TRBJ2-5	TRAC	TRAV29/DV5	TRAJ21	TGTGCAGCAAGCTTATACAACTTCAACAAATTTTACTTT	TRAC	TRBV28	TRBJ2-5	TGTGCCAGCAGTTTTGAAGGTCTACCCCTTCGATTC	1	Blood	10453	FALSE	FALSE	FALSE
CTTAGGACAACTGGCC-1-P190604_Blood_1	clone_P190604:9815:1	P190604	P190604_TRAV14/DV4_TGTGCAATGAGAGAAGCAGGAGGTGCTGACGGACTCACCTTT_TRAJ45:P190604_TRBV28_TGTGCCAGCAGTTTCATTGGACTAGCTGCCTACGAGCAGTACTTC_TRBJ2-7	TRAC	TRAV14/DV4	TRAJ45	TGTGCAATGAGAGAAGCAGGAGGTGCTGACGGACTCACCTTT	TRAC	TRBV28	TRBJ2-7	TGTGCCAGCAGTTTCATTGGACTAGCTGCCTACGAGCAGTACTTC	1	Blood	9815	FALSE	FALSE	FALSE
CTTAGGACATGACATC-1-P190604_Blood_1	clone_P190604:11039:2	P190604	P190604_TRAV9-2_TGTGCTCTGGAATCAGGAGGAAGCTACATACCTACATTT_TRAJ6:P190604_TRBV7-3_TGTGCCAGCAGCTCAACTAGCGGGATGGATGAGCAGTTCTTC_TRBJ2-1	TRAC	TRAV9-2	TRAJ6	TGTGCTCTGGAATCAGGAGGAAGCTACATACCTACATTT	TRAC	TRBV7-3	TRBJ2-1	TGTGCCAGCAGCTCAACTAGCGGGATGGATGAGCAGTTCTTC	2	Blood	11039	TRUE	FALSE	FALSE
CTTAGGAGTCTGCGGT-1-P190604_Blood_1	clone_P190604:10107:1	P190604	P190604_TRAV21_TGTGCCCCCCTAGCGGGGGCAAACAACCTCTTCTTT_TRAJ36:P190604_TRBV10-3_TGTGCCATCAGTGGGACGGGCTCCTACAATGAGCAGTTCTTC_TRBJ2-1	TRAC	TRAV21	TRAJ36	TGTGCCCCCCTAGCGGGGGCAAACAACCTCTTCTTT	TRAC	TRBV10-3	TRBJ2-1	TGTGCCATCAGTGGGACGGGCTCCTACAATGAGCAGTTCTTC	1	Blood	10107	FALSE	FALSE	FALSE
GAAACTCTCCGTCAAA-1-P190604_Blood_1	clone_P190604:9678:1	P190604	P190604_TRAV12-3_TGTGCAATGAGCGGCGGGGAAACCAGTGGCTCTAGGTTGACCTTT_TRAJ58:P190604_TRBV7-8_TGTGCCAGCAGTAAAAGAAGGACTAGCGAGACCCAGTACTTC_TRBJ2-5	TRAC	TRAV12-3	TRAJ58	TGTGCAATGAGCGGCGGGGAAACCAGTGGCTCTAGGTTGACCTTT	TRAC	TRBV7-8	TRBJ2-5	TGTGCCAGCAGTAAAAGAAGGACTAGCGAGACCCAGTACTTC	1	Blood	9678	FALSE	FALSE	FALSE
GAAACTCTCTAACTCT-1-P190604_Blood_1	clone_P190604:10536:1	P190604	P190604_TRAV3_TGTGCTGTGAGAGTTGCCTCGGATAACAATGACATGCGCTTT_TRAJ43:P190604_TRBV2_TGTGCCAGCATTGACAGCCCTTCGAGCTCCTACAATGAGCAGTTCTTC_TRBJ2-1	TRAC	TRAV3	TRAJ43	TGTGCTGTGAGAGTTGCCTCGGATAACAATGACATGCGCTTT	TRAC	TRBV2	TRBJ2-1	TGTGCCAGCATTGACAGCCCTTCGAGCTCCTACAATGAGCAGTTCTTC	1	Blood	10536	FALSE	FALSE	FALSE
GAACATCAGAATTCCC-1-P190604_Blood_1	clone_P190604:10757:1	P190604	P190604_TRAV5_TGTGCAGTGCCCACCGGCACTGCCAGTAAACTCACCTTT_TRAJ44:P190604_TRBV20-1_TGCAGTGCTAGCGGGAGCTCCTACAATGAGCAGTTCTTC_TRBJ2-1	TRAC	TRAV5	TRAJ44	TGTGCAGTGCCCACCGGCACTGCCAGTAAACTCACCTTT	TRAC	TRBV20-1	TRBJ2-1	TGCAGTGCTAGCGGGAGCTCCTACAATGAGCAGTTCTTC	1	Blood	10757	FALSE	FALSE	FALSE
GAACATCGTCAGGACA-1-P190604_Blood_1	clone_P190604:11045:1	P190604	P190604_TRAV9-2_TGTGCTCTGTTTTCTGGTGGCTACAATAAGCTGATTTTT_TRAJ4:P190604_TRBV5-4_TGTGCCAGCAGCTTGGGGCTAGCCGGTAACACCGGGGAGCTGTTTTTT_TRBJ2-2	TRAC	TRAV9-2	TRAJ4	TGTGCTCTGTTTTCTGGTGGCTACAATAAGCTGATTTTT	TRAC	TRBV5-4	TRBJ2-2	TGTGCCAGCAGCTTGGGGCTAGCCGGTAACACCGGGGAGCTGTTTTTT	1	Blood	11045	FALSE	FALSE	FALSE
GAACATCGTGCAACTT-1-P190604_Blood_1	clone_P190604:10464:1	P190604	P190604_TRAV29/DV5_TGTGCAGCATTATACTCAGGAACCTACAAATACATCTTT_TRAJ40:P190604_TRBV11-2_TGTGCCAGCAGCTTAACAGGGGGCTTTGGGGAGACCCAGTACTTC_TRBJ2-5	TRAC	TRAV29/DV5	TRAJ40	TGTGCAGCATTATACTCAGGAACCTACAAATACATCTTT	TRAC	TRBV11-2	TRBJ2-5	TGTGCCAGCAGCTTAACAGGGGGCTTTGGGGAGACCCAGTACTTC	1	Blood	10464	FALSE	FALSE	FALSE
GAACCTAAGACGCTTT-1-P190604_Blood_1	clone_P190604:9931:1	P190604	P190604_TRAV17_TGTGCTACGGAGGGGAACTATGGTCAGAATTTTGTCTTT_TRAJ26:P190604_TRBV3-1_TGTGCCAGCAGCCCGTCGGGACACGTTCAAGAGACCCAGTACTTC_TRBJ2-5	TRAC	TRAV17	TRAJ26	TGTGCTACGGAGGGGAACTATGGTCAGAATTTTGTCTTT	TRAC	TRBV3-1	TRBJ2-5	TGTGCCAGCAGCCCGTCGGGACACGTTCAAGAGACCCAGTACTTC	1	Blood	9931	FALSE	FALSE	FALSE
GAACCTAAGAGGGCTT-1-P190604_Blood_1	clone_P190604:10300:1	P190604	P190604_TRAV26-1_TGCATCGTCAGAGAGGGCTGGGGGAAATTCCAGTTT_TRAJ24:P190604_TRBV20-1_TGCAGTGCTAGAGTGGCGAGGGTGAGGTCGTCCTACGAGCAGTACTTC_TRBJ2-7	TRAC	TRAV26-1	TRAJ24	TGCATCGTCAGAGAGGGCTGGGGGAAATTCCAGTTT	TRAC	TRBV20-1	TRBJ2-7	TGCAGTGCTAGAGTGGCGAGGGTGAGGTCGTCCTACGAGCAGTACTTC	1	Blood	10300	FALSE	FALSE	FALSE
GAACCTATCCAAGTAC-1-P190604_Blood_1	clone_P190604:10280:1	P190604	P190604_TRAV25_TGTGCAGGGGGTAGTGGAGGTAGCAACTATAAACTGACATTT_TRAJ53:P190604_TRBV12-3_TGTGCCAGCAGCCTCCAGTCGGGTAGCGTGAATCAGCCCCAGCATTTT_TRBJ1-5	TRAC	TRAV25	TRAJ53	TGTGCAGGGGGTAGTGGAGGTAGCAACTATAAACTGACATTT	TRAC	TRBV12-3	TRBJ1-5	TGTGCCAGCAGCCTCCAGTCGGGTAGCGTGAATCAGCCCCAGCATTTT	1	Blood	10280	FALSE	FALSE	FALSE
GAAGCAGTCGAGGTAG-1-P190604_Blood_1	clone_P190604:10419:1	P190604	P190604_TRAV29/DV5_TGTGCAGCAAGCGCAAATGGTGGTGCTACAAACAAGCTCATCTTT_TRAJ32:P190604_TRBV20-1_TGCAGTGCTAGGCTTTCAAGCAATCAGCCCCAGCATTTT_TRBJ1-5	TRAC	TRAV29/DV5	TRAJ32	TGTGCAGCAAGCGCAAATGGTGGTGCTACAAACAAGCTCATCTTT	TRAC	TRBV20-1	TRBJ1-5	TGCAGTGCTAGGCTTTCAAGCAATCAGCCCCAGCATTTT	1	Blood	10419	FALSE	FALSE	FALSE
GAATGAAGTACAGACG-1-P190604_Blood_1	clone_P190604:9614:2	P190604	P190604_TRAV12-2_TGTGCCGTGAAGAGGGGAGGAAGCTACATACCTACATTT_TRAJ6:P190604_TRBV24-1_TGTGCCACCAGTGATACAACCGGGACAGGGTGGCGCACAGATACGCAGTATTTT_TRBJ2-3	TRAC	TRAV12-2	TRAJ6	TGTGCCGTGAAGAGGGGAGGAAGCTACATACCTACATTT	TRAC	TRBV24-1	TRBJ2-3	TGTGCCACCAGTGATACAACCGGGACAGGGTGGCGCACAGATACGCAGTATTTT	2	Blood	9614	TRUE	FALSE	FALSE
GAATGAAGTCGTCTTC-1-P190604_Blood_1	clone_P190604:9887:1	P190604	P190604_TRAV16_TGTGCTCTCGGGGAGGTCATCAACAAATTTTACTTT_TRAJ21:P190604_TRBV12-4_TGTGCCAGCAGTAGGGTGAGCACTGAAGCTTTCTTT_TRBJ1-1	TRAC	TRAV16	TRAJ21	TGTGCTCTCGGGGAGGTCATCAACAAATTTTACTTT	TRAC	TRBV12-4	TRBJ1-1	TGTGCCAGCAGTAGGGTGAGCACTGAAGCTTTCTTT	1	Blood	9887	FALSE	FALSE	FALSE
GAATGAATCTGGTTCC-1-P190604_Blood_1	clone_P190604:9692:1	P190604	P190604_TRAV13-1_TGTGCACCACGGCAATATGGAAACAAGCTGGTCTTT_TRAJ47:P190604_TRBV28_TGTGCCAGTCAGGGAGGGTTAGTCGGGGAGCTGTTTTTT_TRBJ2-2	TRAC	TRAV13-1	TRAJ47	TGTGCACCACGGCAATATGGAAACAAGCTGGTCTTT	TRAC	TRBV28	TRBJ2-2	TGTGCCAGTCAGGGAGGGTTAGTCGGGGAGCTGTTTTTT	1	Blood	9692	FALSE	FALSE	FALSE
GACAGAGTCCTAGTGA-1-P190604_Blood_1	clone_P190604:10802:1	P190604	P190604_TRAV8-2_TGTGTTGTGAGTAGGGGGTACAGCAGTGCTTCCAAGATAATCTTT_TRAJ3:P190604_TRBV6-5_TGTGCCAGCAGTTACTCATCCAGTAGCCCCTACAATGAGCAGTTCTTC_TRBJ2-1	TRAC	TRAV8-2	TRAJ3	TGTGTTGTGAGTAGGGGGTACAGCAGTGCTTCCAAGATAATCTTT	TRAC	TRBV6-5	TRBJ2-1	TGTGCCAGCAGTTACTCATCCAGTAGCCCCTACAATGAGCAGTTCTTC	1	Blood	10802	FALSE	FALSE	FALSE
GACCAATAGCCAGTAG-1-P190604_Blood_1	clone_P190604:10039:1	P190604	P190604_TRAV2_TGTGCTGTGGAGGAAAGGAGCAACTATCAGTTAATCTGG_TRAJ33:P190604_TRBV5-4_TGTGCCAGCAGCACTGACAGGGCCCAAGCTTTCTTT_TRBJ1-1	TRAC	TRAV2	TRAJ33	TGTGCTGTGGAGGAAAGGAGCAACTATCAGTTAATCTGG	TRAC	TRBV5-4	TRBJ1-1	TGTGCCAGCAGCACTGACAGGGCCCAAGCTTTCTTT	1	Blood	10039	FALSE	FALSE	FALSE
GACCAATAGGGCTTCC-1-P190604_Blood_1	clone_P190604:10207:1	P190604	P190604_TRAV23/DV6_TGTGCAGCAACGGTACGGGGTAGCAACTATAAACTGACATTT_TRAJ53:P190604_TRBV3-1_TGTGCCAGCAGCCAAGTGAGTCCCGCGGGCGGGCCGCTTGAGACCCAGTACTTC_TRBJ2-5	TRAC	TRAV23/DV6	TRAJ53	TGTGCAGCAACGGTACGGGGTAGCAACTATAAACTGACATTT	TRAC	TRBV3-1	TRBJ2-5	TGTGCCAGCAGCCAAGTGAGTCCCGCGGGCGGGCCGCTTGAGACCCAGTACTTC	1	Blood	10207	FALSE	FALSE	FALSE
GACCAATTCTGGCGAC-1-P190604_Blood_1	clone_P190604:10855:1	P190604	P190604_TRAV8-3_TGTGCTGTGGGTGCGCGGGTCGACTACAAGCTCAGCTTT_TRAJ20:P190604_TRBV6-1_TGTGCCAGCAGTGTTTCCGGAGATACGCAGTATTTT_TRBJ2-3	TRAC	TRAV8-3	TRAJ20	TGTGCTGTGGGTGCGCGGGTCGACTACAAGCTCAGCTTT	TRAC	TRBV6-1	TRBJ2-3	TGTGCCAGCAGTGTTTCCGGAGATACGCAGTATTTT	1	Blood	10855	FALSE	FALSE	FALSE
GACCTGGTCCATGAGT-1-P190604_Blood_1	clone_P190604:10645:1	P190604	P190604_TRAV38-2/DV8_TGTGCTTATCTCTGGGATAGCAACTATCAGTTAATCTGG_TRAJ33:P190604_TRBV10-3_TGTGCCATCAGTGAGAAAGGGACAATTAACTACGAGCAGTACTTC_TRBJ2-7	TRAC	TRAV38-2/DV8	TRAJ33	TGTGCTTATCTCTGGGATAGCAACTATCAGTTAATCTGG	TRAC	TRBV10-3	TRBJ2-7	TGTGCCATCAGTGAGAAAGGGACAATTAACTACGAGCAGTACTTC	1	Blood	10645	FALSE	FALSE	FALSE
GACGCGTTCATAGCAC-1-P190604_Blood_1	clone_P190604:9340:1	P190604	P190604_TRAV1-2_TGTGCTGTAATGGATAGCAACTATCAGTTAATCTGG_TRAJ33:P190604_TRBV20-1_TGCAGTGCTAGAGCGGGAGAGATAGACTACGAGCAGTACTTC_TRBJ2-7	TRAC	TRAV1-2	TRAJ33	TGTGCTGTAATGGATAGCAACTATCAGTTAATCTGG	TRAC	TRBV20-1	TRBJ2-7	TGCAGTGCTAGAGCGGGAGAGATAGACTACGAGCAGTACTTC	1	Blood	9340	FALSE	TRUE	FALSE
GACGTGCGTGAAAGAG-1-P190604_Blood_1	clone_P190604:9682:1	P190604	P190604_TRAV12-3_TGTGCAATGAGGAAGACCGGCACTGCCAGTAAACTCACCTTT_TRAJ44:P190604_TRBV2_TGTGCCAGCAGTGTGGGAGGGGGTTGGCCCCAGCATTTT_TRBJ1-5	TRAC	TRAV12-3	TRAJ44	TGTGCAATGAGGAAGACCGGCACTGCCAGTAAACTCACCTTT	TRAC	TRBV2	TRBJ1-5	TGTGCCAGCAGTGTGGGAGGGGGTTGGCCCCAGCATTTT	1	Blood	9682	FALSE	FALSE	FALSE
GACTAACTCTTTACAC-1-P190604_Blood_1	clone_P190604:10925:1	P190604	P190604_TRAV8-4_TGTGCTGTGAGTGGAGATGCTGGTGGTACTAGCTATGGAAAGCTGACATTT_TRAJ52:P190604_TRBV27_TGTGCCAGCTCGGTGGAAGGATCACTAGCCAAAAACATTCAGTACTTC_TRBJ2-4	TRAC	TRAV8-4	TRAJ52	TGTGCTGTGAGTGGAGATGCTGGTGGTACTAGCTATGGAAAGCTGACATTT	TRAC	TRBV27	TRBJ2-4	TGTGCCAGCTCGGTGGAAGGATCACTAGCCAAAAACATTCAGTACTTC	1	Blood	10925	FALSE	FALSE	FALSE
GACTACAGTCGATTGT-1-P190604_Blood_1	clone_P190604:9557:1	P190604	P190604_TRAV12-1_TGTGTGGTGGCCCCGCCTAACGACTACAAGCTCAGCTTT_TRAJ20:P190604_TRBV5-1_TGCGCCAGCAGCTTCCAAGAGACCCAGTACTTC_TRBJ2-5	TRAC	TRAV12-1	TRAJ20	TGTGTGGTGGCCCCGCCTAACGACTACAAGCTCAGCTTT	TRAC	TRBV5-1	TRBJ2-5	TGCGCCAGCAGCTTCCAAGAGACCCAGTACTTC	1	Blood	9557	FALSE	FALSE	FALSE
GACTACATCCACGACG-1-P190604_Blood_1	clone_P190604:10421:60	P190604	P190604_TRAV29/DV5_TGTGCAGCAAGCGCCCATAGTGGAGGTAGCAACTATAAACTGACATTT_TRAJ53:P190604_TRBV7-9_TGTGCCACCAGATTAGGGTACGAGCAGTACTTC_TRBJ2-7	TRAC	TRAV29/DV5	TRAJ53	TGTGCAGCAAGCGCCCATAGTGGAGGTAGCAACTATAAACTGACATTT	TRAC	TRBV7-9	TRBJ2-7	TGTGCCACCAGATTAGGGTACGAGCAGTACTTC	60	Blood	10421	TRUE	FALSE	FALSE
GACTGCGCACAGATTC-1-P190604_Blood_1	clone_P190604:10552:1	P190604	P190604_TRAV30_TGCGGCACAGACCGGCAGGGAGCCCAGAAGCTGGTATTT_TRAJ54:P190604_TRBV28_TGTGCCAGCAGTTTATTCGGACAGGAAGCTTTCTTT_TRBJ1-1	TRAC	TRAV30	TRAJ54	TGCGGCACAGACCGGCAGGGAGCCCAGAAGCTGGTATTT	TRAC	TRBV28	TRBJ1-1	TGTGCCAGCAGTTTATTCGGACAGGAAGCTTTCTTT	1	Blood	10552	FALSE	FALSE	FALSE
GACTGCGGTCGCCATG-1-P190604_Blood_1	clone_P190604:9614:2	P190604	P190604_TRAV12-2_TGTGCCGTGAAGAGGGGAGGAAGCTACATACCTACATTT_TRAJ6:P190604_TRBV24-1_TGTGCCACCAGTGATACAACCGGGACAGGGTGGCGCACAGATACGCAGTATTTT_TRBJ2-3	TRAC	TRAV12-2	TRAJ6	TGTGCCGTGAAGAGGGGAGGAAGCTACATACCTACATTT	TRAC	TRBV24-1	TRBJ2-3	TGTGCCACCAGTGATACAACCGGGACAGGGTGGCGCACAGATACGCAGTATTTT	2	Blood	9614	TRUE	FALSE	FALSE
GACTGCGTCACTCCTG-1-P190604_Blood_1	clone_P190604:10059:1	P190604	P190604_TRAV2_TGTGCTGTGGGACCGGGGTACAGCAGTGCTTCCAAGATAATCTTT_TRAJ3:P190604_TRBV12-3_TGTGCCAGCAGTTTAGACAGGACAGGGGGCCGTGAAAAACTGTTTTTT_TRBJ1-4	TRAC	TRAV2	TRAJ3	TGTGCTGTGGGACCGGGGTACAGCAGTGCTTCCAAGATAATCTTT	TRAC	TRBV12-3	TRBJ1-4	TGTGCCAGCAGTTTAGACAGGACAGGGGGCCGTGAAAAACTGTTTTTT	1	Blood	10059	FALSE	FALSE	FALSE
GATCGCGAGTTCGATC-1-P190604_Blood_1	clone_P190604:10155:1	P190604	P190604_TRAV21_TGTGCTGTGAGGGGTCCCAGCAGTGCTTCCAAGATAATCTTT_TRAJ3:P190604_TRBV9_TGTGCCAGCAGCAAACGGGACAGCGGGTCCTACAATGAGCAGTTCTTC_TRBJ2-1	TRAC	TRAV21	TRAJ3	TGTGCTGTGAGGGGTCCCAGCAGTGCTTCCAAGATAATCTTT	TRAC	TRBV9	TRBJ2-1	TGTGCCAGCAGCAAACGGGACAGCGGGTCCTACAATGAGCAGTTCTTC	1	Blood	10155	FALSE	FALSE	FALSE
GATCGTACACACATGT-1-P190604_Blood_1	clone_P190604:10282:1	P190604	P190604_TRAV25_TGTGCCCCCCCGGGAGGTAGCAACTATAAACTGACATTT_TRAJ53:P190604_TRBV28_TGTGCCAGCAGTTCCGGGATCTTGAACACCGGGGAGCTGTTTTTT_TRBJ2-2	TRAC	TRAV25	TRAJ53	TGTGCCCCCCCGGGAGGTAGCAACTATAAACTGACATTT	TRAC	TRBV28	TRBJ2-2	TGTGCCAGCAGTTCCGGGATCTTGAACACCGGGGAGCTGTTTTTT	1	Blood	10282	FALSE	FALSE	FALSE
GATCGTAGTAGCGCTC-1-P190604_Blood_1	clone_P190604:10614:1	P190604	P190604_TRAV38-1_TGTGCTTTCATGACCCGACTTCAGGGAGCCCAGAAGCTGGTATTT_TRAJ54:P190604_TRBV5-6_TGTGCCAGCAGCCGACCAGTAGGGGGGAAGAACACTGAAGCTTTCTTT_TRBJ1-1	TRAC	TRAV38-1	TRAJ54	TGTGCTTTCATGACCCGACTTCAGGGAGCCCAGAAGCTGGTATTT	TRAC	TRBV5-6	TRBJ1-1	TGTGCCAGCAGCCGACCAGTAGGGGGGAAGAACACTGAAGCTTTCTTT	1	Blood	10614	FALSE	FALSE	FALSE
GATCTAGCATTCCTGC-1-P190604_Blood_1	clone_P190604:10625:1	P190604	P190604_TRAV38-2/DV8_TGTGCTTATAGGAAAAATAACAATGACATGCGCTTT_TRAJ43:P190604_TRBV20-1_TGCAGTGCTAGAGCGACCACCTCCTACAATGAGCAGTTCTTC_TRBJ2-1	TRAC	TRAV38-2/DV8	TRAJ43	TGTGCTTATAGGAAAAATAACAATGACATGCGCTTT	TRAC	TRBV20-1	TRBJ2-1	TGCAGTGCTAGAGCGACCACCTCCTACAATGAGCAGTTCTTC	1	Blood	10625	FALSE	FALSE	FALSE
GATCTAGTCTTTAGGG-1-P190604_Blood_1	clone_P190604:10364:1	P190604	P190604_TRAV27_TGTGCAGGACTCCTAAAGTCAGGAACCTACAAATACATCTTT_TRAJ40:P190604_TRBV6-6_TGTGCCAGCAGTTACTCGGTCTTGGCCTCTCAGGAACACAATGAGCAGTTCTTC_TRBJ2-1	TRAC	TRAV27	TRAJ40	TGTGCAGGACTCCTAAAGTCAGGAACCTACAAATACATCTTT	TRAC	TRBV6-6	TRBJ2-1	TGTGCCAGCAGTTACTCGGTCTTGGCCTCTCAGGAACACAATGAGCAGTTCTTC	1	Blood	10364	FALSE	FALSE	FALSE
GATGAGGGTAAGCACG-1-P190604_Blood_1	clone_P190604:10020:1	P190604	P190604_TRAV19_TGTGCTCTGAGTTCCCTTGAGGGAAAGCTTATCTTC_TRAJ23:P190604_TRBV12-3_TGTGCCAGCAAGCTACAGGGGGTAGTAAATACGCAGTATTTT_TRBJ2-3	TRAC	TRAV19	TRAJ23	TGTGCTCTGAGTTCCCTTGAGGGAAAGCTTATCTTC	TRAC	TRBV12-3	TRBJ2-3	TGTGCCAGCAAGCTACAGGGGGTAGTAAATACGCAGTATTTT	1	Blood	10020	FALSE	FALSE	FALSE
GATGCTAAGCGATGAC-1-P190604_Blood_1	clone_P190604:9728:1	P190604	P190604_TRAV13-1_TGTGCAGCAAGTATGATCCCCAGGCGCGGAAATGAGAAATTAACCTTT_TRAJ48:P190604_TRBV29-1_TGCAGCGTTAGGGGGGCGCAGACCCAGTACTTC_TRBJ2-5	TRAC	TRAV13-1	TRAJ48	TGTGCAGCAAGTATGATCCCCAGGCGCGGAAATGAGAAATTAACCTTT	TRAC	TRBV29-1	TRBJ2-5	TGCAGCGTTAGGGGGGCGCAGACCCAGTACTTC	1	Blood	9728	FALSE	FALSE	FALSE
GATGCTAAGTGGACGT-1-P190604_Blood_1	clone_P190604:9777:1	P190604	P190604_TRAV13-2_TGTGCAGAGAATATCCGGGAAACTGGGGCAAACAACCTCTTCTTT_TRAJ36:P190604_TRBV12-3_TGTGCCAGCAGTTTACAGCGAAACACCATATATTTT_TRBJ1-3	TRAC	TRAV13-2	TRAJ36	TGTGCAGAGAATATCCGGGAAACTGGGGCAAACAACCTCTTCTTT	TRAC	TRBV12-3	TRBJ1-3	TGTGCCAGCAGTTTACAGCGAAACACCATATATTTT	1	Blood	9777	FALSE	FALSE	FALSE
GATTCAGAGCTGCCCA-1-P190604_Blood_1	clone_P190604:10421:60	P190604	P190604_TRAV29/DV5_TGTGCAGCAAGCGCCCATAGTGGAGGTAGCAACTATAAACTGACATTT_TRAJ53:P190604_TRBV7-9_TGTGCCACCAGATTAGGGTACGAGCAGTACTTC_TRBJ2-7	TRAC	TRAV29/DV5	TRAJ53	TGTGCAGCAAGCGCCCATAGTGGAGGTAGCAACTATAAACTGACATTT	TRAC	TRBV7-9	TRBJ2-7	TGTGCCACCAGATTAGGGTACGAGCAGTACTTC	60	Blood	10421	TRUE	FALSE	FALSE
GATTCAGCATCGGACC-1-P190604_Blood_1	clone_P190604:10906:1	P190604	P190604_TRAV8-4_TGTGCTGTGAGTGAAGGACTCACGGGAGGAGGAAACAAACTCACCTTT_TRAJ10:P190604_TRBV5-1_TGCGCCAGCAGCTTGGAAAGGGCTGAGAGGGCCTACAATGAGCAGTTCTTC_TRBJ2-1	TRAC	TRAV8-4	TRAJ10	TGTGCTGTGAGTGAAGGACTCACGGGAGGAGGAAACAAACTCACCTTT	TRAC	TRBV5-1	TRBJ2-1	TGCGCCAGCAGCTTGGAAAGGGCTGAGAGGGCCTACAATGAGCAGTTCTTC	1	Blood	10906	FALSE	FALSE	FALSE
GCAAACTCATCGATGT-1-P190604_Blood_1	clone_P190604:10223:1	P190604	P190604_TRAV23/DV6_TGTGCAGCAAGGGGAAGCAATGCCAGACTCATGTTT_TRAJ31:P190604_TRBV2_TGTGCCAGTATGTCCGGGACAGGGGCTGGTGAGCAGTACTTC_TRBJ2-7	TRAC	TRAV23/DV6	TRAJ31	TGTGCAGCAAGGGGAAGCAATGCCAGACTCATGTTT	TRAC	TRBV2	TRBJ2-7	TGTGCCAGTATGTCCGGGACAGGGGCTGGTGAGCAGTACTTC	1	Blood	10223	FALSE	FALSE	FALSE
GCAAACTTCGGAGCAA-1-P190604_Blood_1	clone_P190604:10839:1	P190604	P190604_TRAV8-3_TGTGCTGTGGGCCCTAACGACTACAAGCTCAGCTTT_TRAJ20:P190604_TRBV29-1_TGCAGCGCAGGGACAGGGGGCCTCACTGAAGCTTTCTTT_TRBJ1-1	TRAC	TRAV8-3	TRAJ20	TGTGCTGTGGGCCCTAACGACTACAAGCTCAGCTTT	TRAC	TRBV29-1	TRBJ1-1	TGCAGCGCAGGGACAGGGGGCCTCACTGAAGCTTTCTTT	1	Blood	10839	FALSE	FALSE	FALSE
GCAATCAAGCGTGAAC-1-P190604_Blood_1	clone_P190604:10421:60	P190604	P190604_TRAV29/DV5_TGTGCAGCAAGCGCCCATAGTGGAGGTAGCAACTATAAACTGACATTT_TRAJ53:P190604_TRBV7-9_TGTGCCACCAGATTAGGGTACGAGCAGTACTTC_TRBJ2-7	TRAC	TRAV29/DV5	TRAJ53	TGTGCAGCAAGCGCCCATAGTGGAGGTAGCAACTATAAACTGACATTT	TRAC	TRBV7-9	TRBJ2-7	TGTGCCACCAGATTAGGGTACGAGCAGTACTTC	60	Blood	10421	TRUE	FALSE	FALSE
GCAATCACAGTAAGCG-1-P190604_Blood_1	clone_P190604:9518:1	P190604	P190604_TRAV12-1_TGTGTGGTGAACAGGCGAGGCTCTAGCAACACAGGCAAACTAATCTTT_TRAJ37:P190604_TRBV9_TGTGCCAGCAGCGTCGGCGGTTCGAACACCGGGGAGCTGTTTTTT_TRBJ2-2	TRAC	TRAV12-1	TRAJ37	TGTGTGGTGAACAGGCGAGGCTCTAGCAACACAGGCAAACTAATCTTT	TRAC	TRBV9	TRBJ2-2	TGTGCCAGCAGCGTCGGCGGTTCGAACACCGGGGAGCTGTTTTTT	1	Blood	9518	FALSE	FALSE	FALSE
GCAATCACATATACGC-1-P190604_Blood_1	clone_P190604:10569:1	P190604	P190604_TRAV35_TGTGCTGCCCACTCAGGAACCTACAAATACATCTTT_TRAJ40:P190604_TRBV28_TGTGCCAGCAGTTCTCGATCGGGGGAGACCCAGTACTTC_TRBJ2-5	TRAC	TRAV35	TRAJ40	TGTGCTGCCCACTCAGGAACCTACAAATACATCTTT	TRAC	TRBV28	TRBJ2-5	TGTGCCAGCAGTTCTCGATCGGGGGAGACCCAGTACTTC	1	Blood	10569	FALSE	FALSE	FALSE
GCAATCAGTCAGAAGC-1-P190604_Blood_1	clone_P190604:10421:60	P190604	P190604_TRAV29/DV5_TGTGCAGCAAGCGCCCATAGTGGAGGTAGCAACTATAAACTGACATTT_TRAJ53:P190604_TRBV7-9_TGTGCCACCAGATTAGGGTACGAGCAGTACTTC_TRBJ2-7	TRAC	TRAV29/DV5	TRAJ53	TGTGCAGCAAGCGCCCATAGTGGAGGTAGCAACTATAAACTGACATTT	TRAC	TRBV7-9	TRBJ2-7	TGTGCCACCAGATTAGGGTACGAGCAGTACTTC	60	Blood	10421	TRUE	FALSE	FALSE
GCATACAGTACCGAGA-1-P190604_Blood_1	clone_P190604:9520:2	P190604	P190604_TRAV12-1_TGTGTGGTGAACATCCGTGACAAGATCATCTTT_TRAJ30:P190604_TRBV7-9_TGTGCCAGCAGCTTACAGGGCAGGGAGCAGTACTTC_TRBJ2-7	TRAC	TRAV12-1	TRAJ30	TGTGTGGTGAACATCCGTGACAAGATCATCTTT	TRAC	TRBV7-9	TRBJ2-7	TGTGCCAGCAGCTTACAGGGCAGGGAGCAGTACTTC	2	Blood	9520	TRUE	FALSE	FALSE
GCATGATCAATAAGCA-1-P190604_Blood_1	clone_P190604:10758:1	P190604	P190604_TRAV6_TGTGCTCTACCGAATTCAGGATACAGCACCCTCACCTTT_TRAJ11:P190604_TRBV7-9_TGTGCCAGCAGCAACCAACTAGATACTTACGAGCAGTACTTC_TRBJ2-7	TRAC	TRAV6	TRAJ11	TGTGCTCTACCGAATTCAGGATACAGCACCCTCACCTTT	TRAC	TRBV7-9	TRBJ2-7	TGTGCCAGCAGCAACCAACTAGATACTTACGAGCAGTACTTC	1	Blood	10758	FALSE	FALSE	FALSE
GCATGCGCAACTGGCC-1-P190604_Blood_1	clone_P190604:10981:1	P190604	P190604_TRAV9-2_TGTGCTCTGACCCCGAACCAGGGAGGAAAGCTTATCTTC_TRAJ23:P190604_TRBV5-1_TGCGCCAGCAGCTTGGGGAGCTCTGGAAACACCATATATTTT_TRBJ1-3	TRAC	TRAV9-2	TRAJ23	TGTGCTCTGACCCCGAACCAGGGAGGAAAGCTTATCTTC	TRAC	TRBV5-1	TRBJ1-3	TGCGCCAGCAGCTTGGGGAGCTCTGGAAACACCATATATTTT	1	Blood	10981	FALSE	FALSE	FALSE
GCATGCGCAGCTGCTG-1-P190604_Blood_1	clone_P190604:10157:1	P190604	P190604_TRAV21_TGTGCTGTGATATACAGCACCCTCACCTTT_TRAJ11:P190604_TRBV12-4_TGTGCCAGCAGTTTTAACAGGGGGAGCACTGAAGCTTTCTTT_TRBJ1-1	TRAC	TRAV21	TRAJ11	TGTGCTGTGATATACAGCACCCTCACCTTT	TRAC	TRBV12-4	TRBJ1-1	TGTGCCAGCAGTTTTAACAGGGGGAGCACTGAAGCTTTCTTT	1	Blood	10157	FALSE	FALSE	FALSE
GCATGTAAGACAGAGA-1-P190604_Blood_1	clone_P190604:10779:1	P190604	P190604_TRAV8-1_TGTGCCGTGAATGAAACGAAAACCTCCTACGACAAGGTGATATTT_TRAJ50:P190604_TRBV6-6_TGTGCCAGCAGTTACGGGAGCCCTAGCGGGAGGGAGGCTTACGAGCAGTACTTC_TRBJ2-7	TRAC	TRAV8-1	TRAJ50	TGTGCCGTGAATGAAACGAAAACCTCCTACGACAAGGTGATATTT	TRAC	TRBV6-6	TRBJ2-7	TGTGCCAGCAGTTACGGGAGCCCTAGCGGGAGGGAGGCTTACGAGCAGTACTTC	1	Blood	10779	FALSE	FALSE	FALSE
GCATGTATCAGTGCAT-1-P190604_Blood_1	clone_P190604:10639:1	P190604	P190604_TRAV38-2/DV8_TGTGCTTATAGGAGTGGTCAGGGAGCCCAGAAGCTGGTATTT_TRAJ54:P190604_TRBV19_TGTGCCAGTAGTATTGTGGGACAGGGGTGGAATCAGCCCCAGCATTTT_TRBJ1-5	TRAC	TRAV38-2/DV8	TRAJ54	TGTGCTTATAGGAGTGGTCAGGGAGCCCAGAAGCTGGTATTT	TRAC	TRBV19	TRBJ1-5	TGTGCCAGTAGTATTGTGGGACAGGGGTGGAATCAGCCCCAGCATTTT	1	Blood	10639	FALSE	FALSE	FALSE
GCATGTATCTTCATGT-1-P190604_Blood_1	clone_P190604:10177:1	P190604	P190604_TRAV21_TGTGCTGTGTTTACTACCTCAGGAACCTACAAATACATCTTT_TRAJ40:P190604_TRBV6-5_TGTGCCAGCAGTCCGACTAGCGGGAGGACAGATACGCAGTATTTT_TRBJ2-3	TRAC	TRAV21	TRAJ40	TGTGCTGTGTTTACTACCTCAGGAACCTACAAATACATCTTT	TRAC	TRBV6-5	TRBJ2-3	TGTGCCAGCAGTCCGACTAGCGGGAGGACAGATACGCAGTATTTT	1	Blood	10177	FALSE	FALSE	FALSE
GCCAAATAGGGCTCTC-1-P190604_Blood_1	clone_P190604:9968:1	P190604	P190604_TRAV19_TGTGCTCTGAGAGAAACCTCCTACGACAAGGTGATATTT_TRAJ50:P190604_TRBV6-1_TGTGCCAGCAGTGAAGACCTCAACCTGAACACTGAAGCTTTCTTT_TRBJ1-1	TRAC	TRAV19	TRAJ50	TGTGCTCTGAGAGAAACCTCCTACGACAAGGTGATATTT	TRAC	TRBV6-1	TRBJ1-1	TGTGCCAGCAGTGAAGACCTCAACCTGAACACTGAAGCTTTCTTT	1	Blood	9968	FALSE	FALSE	FALSE
GCCTCTACAGACGCCT-1-P190604_Blood_1	clone_P190604:10145:1	P190604	P190604_TRAV21_TGTGCTGTGAGGCATGGGCAGGCAGGAACTGCTCTGATCTTT_TRAJ15:P190604_TRBV20-1_TGCAGTGCTAGAGTTCCCGACAGGGGCTATGGCTACACCTTC_TRBJ1-2	TRAC	TRAV21	TRAJ15	TGTGCTGTGAGGCATGGGCAGGCAGGAACTGCTCTGATCTTT	TRAC	TRBV20-1	TRBJ1-2	TGCAGTGCTAGAGTTCCCGACAGGGGCTATGGCTACACCTTC	1	Blood	10145	FALSE	FALSE	FALSE
GCGACCATCTTCTGGC-1-P190604_Blood_1	clone_P190604:9587:1	P190604	P190604_TRAV12-2_TGTGCCGTGAACAAAGCAGGAGGAAGCTACATACCTACATTT_TRAJ6:P190604_TRBV3-1_TGTGCCAGCAGCCAAGCCGGGAATAGCAATCAGCCCCAGCATTTT_TRBJ1-5	TRAC	TRAV12-2	TRAJ6	TGTGCCGTGAACAAAGCAGGAGGAAGCTACATACCTACATTT	TRAC	TRBV3-1	TRBJ1-5	TGTGCCAGCAGCCAAGCCGGGAATAGCAATCAGCCCCAGCATTTT	1	Blood	9587	FALSE	FALSE	FALSE
GCGCAACGTGTGCGTC-1-P190604_Blood_1	clone_P190604:10871:1	P190604	P190604_TRAV8-3_TGTGCTGTGGTAGGATATGGAGGAAGCCAAGGAAATCTCATCTTT_TRAJ42:P190604_TRBV6-2_TGTGCCAGCAGTTACTCGACCCAGGGTGGTGGCTACACCTTC_TRBJ1-2	TRAC	TRAV8-3	TRAJ42	TGTGCTGTGGTAGGATATGGAGGAAGCCAAGGAAATCTCATCTTT	TRAC	TRBV6-2	TRBJ1-2	TGTGCCAGCAGTTACTCGACCCAGGGTGGTGGCTACACCTTC	1	Blood	10871	FALSE	FALSE	FALSE
GCGCAGTCACTGTGTA-1-P190604_Blood_1	clone_P190604:10633:1	P190604	P190604_TRAV38-2/DV8_TGTGCTTATAGGAGCGCGTTAAGTGGAGGTAGCAACTATAAACTGACATTT_TRAJ53:P190604_TRBV27_TGTGCCAGCAGTTACAGGTCTAATGAGCAGTTCTTC_TRBJ2-1	TRAC	TRAV38-2/DV8	TRAJ53	TGTGCTTATAGGAGCGCGTTAAGTGGAGGTAGCAACTATAAACTGACATTT	TRAC	TRBV27	TRBJ2-1	TGTGCCAGCAGTTACAGGTCTAATGAGCAGTTCTTC	1	Blood	10633	FALSE	FALSE	FALSE
GCGCAGTTCACTTCAT-1-P190604_Blood_1	clone_P190604:10629:1	P190604	P190604_TRAV38-2/DV8_TGTGCTTATAGGAGCGAATATGGAAACAAGCTGGTCTTT_TRAJ47:P190604_TRBV6-2_TGTGCCAGCAGCCGACGAAGGCAGGACACTGAAGCTTTCTTT_TRBJ1-1	TRAC	TRAV38-2/DV8	TRAJ47	TGTGCTTATAGGAGCGAATATGGAAACAAGCTGGTCTTT	TRAC	TRBV6-2	TRBJ1-1	TGTGCCAGCAGCCGACGAAGGCAGGACACTGAAGCTTTCTTT	1	Blood	10629	FALSE	FALSE	FALSE
GCGCAGTTCGAACTGT-1-P190604_Blood_1	clone_P190604:9920:1	P190604	P190604_TRAV17_TGTGCTACGGACGCGGAGGAGGGAGGAAGCCAAGGAAATCTCATCTTT_TRAJ42:P190604_TRBV28_TGTGCCAGCAGTTTATGGCAGGGAGGGAACGAGCAGTACTTC_TRBJ2-7	TRAC	TRAV17	TRAJ42	TGTGCTACGGACGCGGAGGAGGGAGGAAGCCAAGGAAATCTCATCTTT	TRAC	TRBV28	TRBJ2-7	TGTGCCAGCAGTTTATGGCAGGGAGGGAACGAGCAGTACTTC	1	Blood	9920	FALSE	FALSE	FALSE
GCTCCTACACAGCCCA-1-P190604_Blood_1	clone_P190604:9668:1	P190604	P190604_TRAV12-3_TGTGCAATGAGCGCGAGTAGCGGTAACCAGTTCTATTTT_TRAJ49:P190604_TRBV19_TGTGCCAGTAGTATAGGAGGGAACAATGAGCAGTTCTTC_TRBJ2-1	TRAC	TRAV12-3	TRAJ49	TGTGCAATGAGCGCGAGTAGCGGTAACCAGTTCTATTTT	TRAC	TRBV19	TRBJ2-1	TGTGCCAGTAGTATAGGAGGGAACAATGAGCAGTTCTTC	1	Blood	9668	FALSE	FALSE	FALSE
GCTCCTAGTGTGCGTC-1-P190604_Blood_1	clone_P190604:10612:1	P190604	P190604_TRAV38-1_TGTGCTTTCATGAAGCGAGGCTCTAGCAACACAGGCAAACTAATCTTT_TRAJ37:P190604_TRBV19_TGTGCCAGTAGTACTAATGCGGGAGCCTACAATGAGCAGTTCTTC_TRBJ2-1	TRAC	TRAV38-1	TRAJ37	TGTGCTTTCATGAAGCGAGGCTCTAGCAACACAGGCAAACTAATCTTT	TRAC	TRBV19	TRBJ2-1	TGTGCCAGTAGTACTAATGCGGGAGCCTACAATGAGCAGTTCTTC	1	Blood	10612	FALSE	FALSE	FALSE
GCTCTGTCACATTTCT-1-P190604_Blood_1	clone_P190604:10596:1	P190604	P190604_TRAV36/DV7_TGTGCTGCGGTTCCATATTCAGGAGGAGGTGCTGACGGACTCACCTTT_TRAJ45:P190604_TRBV5-1_TGCGCCAGCAGCACAGACAGGGTTAGGGAGCAGTACTTC_TRBJ2-7	TRAC	TRAV36/DV7	TRAJ45	TGTGCTGCGGTTCCATATTCAGGAGGAGGTGCTGACGGACTCACCTTT	TRAC	TRBV5-1	TRBJ2-7	TGCGCCAGCAGCACAGACAGGGTTAGGGAGCAGTACTTC	1	Blood	10596	FALSE	FALSE	FALSE
GCTGCTTAGGTAAACT-1-P190604_Blood_1	clone_P190604:9976:1	P190604	P190604_TRAV19_TGTGCTCTGAGGGGCTTTGGGAATGTGCTGCATTGC_TRAJ35:P190604_TRBV9_TGTGCCAGCAGCGAAGACGGGACTGACAATGAGCAGTTCTTC_TRBJ2-1	TRAC	TRAV19	TRAJ35	TGTGCTCTGAGGGGCTTTGGGAATGTGCTGCATTGC	TRAC	TRBV9	TRBJ2-1	TGTGCCAGCAGCGAAGACGGGACTGACAATGAGCAGTTCTTC	1	Blood	9976	FALSE	FALSE	FALSE
GCTGGGTCATTATCTC-1-P190604_Blood_1	clone_P190604:10413:1	P190604	P190604_TRAV29/DV5_TGTGCAGCAAGCGAGCAGGCAGGAACTGCTCTGATCTTT_TRAJ15:P190604_TRBV28_TGTGCCAGCAGTTTATCGAAGACAGGGCCTCTTAATCAGCCCCAGCATTTT_TRBJ1-5	TRAC	TRAV29/DV5	TRAJ15	TGTGCAGCAAGCGAGCAGGCAGGAACTGCTCTGATCTTT	TRAC	TRBV28	TRBJ1-5	TGTGCCAGCAGTTTATCGAAGACAGGGCCTCTTAATCAGCCCCAGCATTTT	1	Blood	10413	FALSE	FALSE	FALSE
GCTGGGTGTAGTACCT-1-P190604_Blood_1	clone_P190604:10728:1	P190604	P190604_TRAV5_TGTGCAGAGACTGACAGCTGGGGGAAATTGCAGTTT_TRAJ24:P190604_TRBV28_TGTGCCAGCAGTCAACAGCCGGGACAGACTAATGAAAAACTGTTTTTT_TRBJ1-4	TRAC	TRAV5	TRAJ24	TGTGCAGAGACTGACAGCTGGGGGAAATTGCAGTTT	TRAC	TRBV28	TRBJ1-4	TGTGCCAGCAGTCAACAGCCGGGACAGACTAATGAAAAACTGTTTTTT	1	Blood	10728	FALSE	FALSE	FALSE
GCTGGGTGTCGGCACT-1-P190604_Blood_1	clone_P190604:10715:1	P190604	P190604_TRAV41_TGTGCTGTCCCCCGTAGCAACTATAAACTGACATTT_TRAJ53:P190604_TRBV19_TGTGCCAGTAGGGAGGCGGACTCCTACGAGCAGTACTTC_TRBJ2-7	TRAC	TRAV41	TRAJ53	TGTGCTGTCCCCCGTAGCAACTATAAACTGACATTT	TRAC	TRBV19	TRBJ2-7	TGTGCCAGTAGGGAGGCGGACTCCTACGAGCAGTACTTC	1	Blood	10715	FALSE	FALSE	FALSE
GGACAAGTCCTTCAAT-1-P190604_Blood_1	clone_P190604:9623:1	P190604	P190604_TRAV12-2_TGTGCCGTGACTAACGACTACAAGCTCAGCTTT_TRAJ20:P190604_TRBV6-6_TGTGCCAGCAGTTACTCCCCAGGGAGGGATGAGCAGTTCTTC_TRBJ2-1	TRAC	TRAV12-2	TRAJ20	TGTGCCGTGACTAACGACTACAAGCTCAGCTTT	TRAC	TRBV6-6	TRBJ2-1	TGTGCCAGCAGTTACTCCCCAGGGAGGGATGAGCAGTTCTTC	1	Blood	9623	FALSE	FALSE	FALSE
GGACATTTCATAAAGG-1-P190604_Blood_1	clone_P190604:10421:60	P190604	P190604_TRAV29/DV5_TGTGCAGCAAGCGCCCATAGTGGAGGTAGCAACTATAAACTGACATTT_TRAJ53:P190604_TRBV7-9_TGTGCCACCAGATTAGGGTACGAGCAGTACTTC_TRBJ2-7	TRAC	TRAV29/DV5	TRAJ53	TGTGCAGCAAGCGCCCATAGTGGAGGTAGCAACTATAAACTGACATTT	TRAC	TRBV7-9	TRBJ2-7	TGTGCCACCAGATTAGGGTACGAGCAGTACTTC	60	Blood	10421	TRUE	FALSE	FALSE
GGAGCAATCTCAAGTG-1-P190604_Blood_1	clone_P190604:9713:1	P190604	P190604_TRAV13-1_TGTGCAGCAAGTACGGATAACTATGGTCAGAATTTTGTCTTT_TRAJ26:P190604_TRBV28_TGTGCCAGCAGTTTTTATGGGAGGGGGCGAACCTACAATGAGCAGTTCTTC_TRBJ2-1	TRAC	TRAV13-1	TRAJ26	TGTGCAGCAAGTACGGATAACTATGGTCAGAATTTTGTCTTT	TRAC	TRBV28	TRBJ2-1	TGTGCCAGCAGTTTTTATGGGAGGGGGCGAACCTACAATGAGCAGTTCTTC	1	Blood	9713	FALSE	FALSE	FALSE
GGATGTTTCGCAGGCT-1-P190604_Blood_1	clone_P190604:10939:1	P190604	P190604_TRAV8-6_TGTGCTGTGAGCCCAGGTGGGGGAAGCCAAGGAAATCTCATCTTT_TRAJ42:P190604_TRBV7-9_TGTGCCAGCAGCTTAGCGGGGTTTAATACAGATACGCAGTATTTT_TRBJ2-3	TRAC	TRAV8-6	TRAJ42	TGTGCTGTGAGCCCAGGTGGGGGAAGCCAAGGAAATCTCATCTTT	TRAC	TRBV7-9	TRBJ2-3	TGTGCCAGCAGCTTAGCGGGGTTTAATACAGATACGCAGTATTTT	1	Blood	10939	FALSE	FALSE	FALSE
GGATGTTTCTTGGGTA-1-P190604_Blood_1	clone_P190604:10345:1	P190604	P190604_TRAV26-2_TGCATCCTGAGAGACTCAGGAACCTACAAATACATCTTT_TRAJ40:P190604_TRBV25-1_TGTGCCAGCAGTGAAAAAGCGGGAGTCCGTAATGAGCAGTTCTTC_TRBJ2-1	TRAC	TRAV26-2	TRAJ40	TGCATCCTGAGAGACTCAGGAACCTACAAATACATCTTT	TRAC	TRBV25-1	TRBJ2-1	TGTGCCAGCAGTGAAAAAGCGGGAGTCCGTAATGAGCAGTTCTTC	1	Blood	10345	FALSE	FALSE	FALSE
GGCAATTGTCTCGTTC-1-P190604_Blood_1	clone_P190604:10901:8	P190604	P190604_TRAV8-4_TGTGCTGTGAGTCCTGCTAACCAGGGAGGAAAGCTTATCTTC_TRAJ23:P190604_TRBV20-1_TGCAGTGCTCGGACTAGCGGTACCTACTACGAGCAGTACTTC_TRBJ2-7	TRAC	TRAV8-4	TRAJ23	TGTGCTGTGAGTCCTGCTAACCAGGGAGGAAAGCTTATCTTC	TRAC	TRBV20-1	TRBJ2-7	TGCAGTGCTCGGACTAGCGGTACCTACTACGAGCAGTACTTC	8	Blood	10901	TRUE	FALSE	FALSE
GGCGACTAGAGGGATA-1-P190604_Blood_1	clone_P190604:10929:1	P190604	P190604_TRAV8-4_TGTGCTGTGAGTGTGGGGTCTAACGACTACAAGCTCAGCTTT_TRAJ20:P190604_TRBV15_TGTGCCACCAGCAGAGATATCGGGGGGACTGAAGCTTTCTTT_TRBJ1-1	TRAC	TRAV8-4	TRAJ20	TGTGCTGTGAGTGTGGGGTCTAACGACTACAAGCTCAGCTTT	TRAC	TRBV15	TRBJ1-1	TGTGCCACCAGCAGAGATATCGGGGGGACTGAAGCTTTCTTT	1	Blood	10929	FALSE	FALSE	FALSE
GGCGTGTCACTTACGA-1-P190604_Blood_1	clone_P190604:10546:1	P190604	P190604_TRAV3_TGTGCTGTGCTCGGAAATACTGGAGGCTTCAAAACTATCTTT_TRAJ9:P190604_TRBV30_TGTGCCTGGAGTGTCCCTCCACCGACACTCCGCTCCTACAATGAGCAGTTCTTC_TRBJ2-1	TRAC	TRAV3	TRAJ9	TGTGCTGTGCTCGGAAATACTGGAGGCTTCAAAACTATCTTT	TRAC	TRBV30	TRBJ2-1	TGTGCCTGGAGTGTCCCTCCACCGACACTCCGCTCCTACAATGAGCAGTTCTTC	1	Blood	10546	FALSE	FALSE	FALSE
GGCGTGTTCCTCGCAT-1-P190604_Blood_1	clone_P190604:10746:1	P190604	P190604_TRAV5_TGTGCAGAGAGTCCTTCATCAGGAGGAAGCTACATACCTACATTT_TRAJ6:P190604_TRBV5-1_TGCGCCAGCAGCTTGGCCGACAGGGTGGCCTACGAGCAGTACTTC_TRBJ2-7	TRAC	TRAV5	TRAJ6	TGTGCAGAGAGTCCTTCATCAGGAGGAAGCTACATACCTACATTT	TRAC	TRBV5-1	TRBJ2-7	TGCGCCAGCAGCTTGGCCGACAGGGTGGCCTACGAGCAGTACTTC	1	Blood	10746	FALSE	FALSE	FALSE
GGCTGGTAGCGTAATA-1-P190604_Blood_1	clone_P190604:9857:1	P190604	P190604_TRAV14/DV4_TGTGCAATGAGCGTTTATAACCAGGGAGGAAAGCTTATCTTC_TRAJ23:P190604_TRBV5-1_TGCGCCAGCAGCCCGATCGGGGACTTATACAATGAGCAGTTCTTC_TRBJ2-1	TRAC	TRAV14/DV4	TRAJ23	TGTGCAATGAGCGTTTATAACCAGGGAGGAAAGCTTATCTTC	TRAC	TRBV5-1	TRBJ2-1	TGCGCCAGCAGCCCGATCGGGGACTTATACAATGAGCAGTTCTTC	1	Blood	9857	FALSE	FALSE	FALSE
GGCTGGTAGTTGTAGA-1-P190604_Blood_1	clone_P190604:10938:1	P190604	P190604_TRAV8-6_TGTGCTGTGAAGGGCAGTGCTTCCAAGATAATCTTT_TRAJ3:P190604_TRBV6-1_TGTGCCAGCAGTCCGGACAGTTTAGGAAACACCATATATTTT_TRBJ1-3	TRAC	TRAV8-6	TRAJ3	TGTGCTGTGAAGGGCAGTGCTTCCAAGATAATCTTT	TRAC	TRBV6-1	TRBJ1-3	TGTGCCAGCAGTCCGGACAGTTTAGGAAACACCATATATTTT	1	Blood	10938	FALSE	FALSE	FALSE
GGCTGGTGTACTTCTT-1-P190604_Blood_1	clone_P190604:9791:1	P190604	P190604_TRAV13-2_TGTGCAGAGACTTATTATAACCAGGGAGGAAAGCTTATCTTC_TRAJ23:P190604_TRBV20-1_TGCAGTGCTAGCGGCAGGGGGGGGGTAGCGGGAGTGAAACACGGGGAGCTGTTTTTT_TRBJ2-2	TRAC	TRAV13-2	TRAJ23	TGTGCAGAGACTTATTATAACCAGGGAGGAAAGCTTATCTTC	TRAC	TRBV20-1	TRBJ2-2	TGCAGTGCTAGCGGCAGGGGGGGGGTAGCGGGAGTGAAACACGGGGAGCTGTTTTTT	1	Blood	9791	FALSE	FALSE	FALSE
GGCTGGTGTCAAGCGA-1-P190604_Blood_1	clone_P190604:10782:1	P190604	P190604_TRAV8-1_TGTGCCGTGAATGCGCAGGACAAGCTCAGCTTT_TRAJ20:P190604_TRBV7-9_TGTGCCAGCAGCTACCAGGCGGAGACCCAGTACTTC_TRBJ2-5	TRAC	TRAV8-1	TRAJ20	TGTGCCGTGAATGCGCAGGACAAGCTCAGCTTT	TRAC	TRBV7-9	TRBJ2-5	TGTGCCAGCAGCTACCAGGCGGAGACCCAGTACTTC	1	Blood	10782	FALSE	FALSE	FALSE
GGGACCTAGGTGTGGT-1-P190604_Blood_1	clone_P190604:9983:1	P190604	P190604_TRAV19_TGTGCTCTGAGTGAGAATAACCAGGGAGGAAAGCTTATCTTC_TRAJ23:P190604_TRBV12-3_TGTGCCAGCAGCCTTAGCGGGGGACTAGCGGGCCACACCGGGGAGCTGTTTTTT_TRBJ2-2	TRAC	TRAV19	TRAJ23	TGTGCTCTGAGTGAGAATAACCAGGGAGGAAAGCTTATCTTC	TRAC	TRBV12-3	TRBJ2-2	TGTGCCAGCAGCCTTAGCGGGGGACTAGCGGGCCACACCGGGGAGCTGTTTTTT	1	Blood	9983	FALSE	FALSE	FALSE
GGGTCTGAGAAGGTGA-1-P190604_Blood_1	clone_P190604:10328:1	P190604	P190604_TRAV26-1_TGCATCGTCAGGTGGGGCAATAACAATGACATGCGCTTT_TRAJ43:P190604_TRBV9_TGTGCCAGCAGCCCCCACTTGGACAGTGCGCACACTGAAGCTTTCTTT_TRBJ1-1	TRAC	TRAV26-1	TRAJ43	TGCATCGTCAGGTGGGGCAATAACAATGACATGCGCTTT	TRAC	TRBV9	TRBJ1-1	TGTGCCAGCAGCCCCCACTTGGACAGTGCGCACACTGAAGCTTTCTTT	1	Blood	10328	FALSE	FALSE	FALSE
GGGTTGCTCTGCTGCT-1-P190604_Blood_1	clone_P190604:10823:1	P190604	P190604_TRAV8-2_TGTGTTGTGCCGAATTCAGGAAACACACCTCTTGTCTTT_TRAJ29:P190604_TRBV5-1_TGCGCCAGCAGCGTACAAGAGACCCAGTACTTC_TRBJ2-5	TRAC	TRAV8-2	TRAJ29	TGTGTTGTGCCGAATTCAGGAAACACACCTCTTGTCTTT	TRAC	TRBV5-1	TRBJ2-5	TGCGCCAGCAGCGTACAAGAGACCCAGTACTTC	1	Blood	10823	FALSE	FALSE	FALSE
GGTGAAGGTGTGCCTG-1-P190604_Blood_1	clone_P190604:10637:1	P190604	P190604_TRAV38-2/DV8_TGTGCTTATAGGAGTCCTCGGGTAAACGGCACTGCCAGTAAACTCACCTTT_TRAJ44:P190604_TRBV20-1_TGCAGTGCTAGACTCTTAAGTTATGGCAGCAATCAGCCCCAGCATTTT_TRBJ1-5	TRAC	TRAV38-2/DV8	TRAJ44	TGTGCTTATAGGAGTCCTCGGGTAAACGGCACTGCCAGTAAACTCACCTTT	TRAC	TRBV20-1	TRBJ1-5	TGCAGTGCTAGACTCTTAAGTTATGGCAGCAATCAGCCCCAGCATTTT	1	Blood	10637	FALSE	FALSE	FALSE
GGTGTTAGTAGCTCCG-1-P190604_Blood_1	clone_P190604:10907:1	P190604	P190604_TRAV8-4_TGTGCTGTGAGTGAAGGCGGCGGTGGTGCTACAAACAAGCTCATCTTT_TRAJ32:P190604_TRBV6-1_TGTGCCAGCAGTGACCCTCGCGAGCAGTACTTC_TRBJ2-7	TRAC	TRAV8-4	TRAJ32	TGTGCTGTGAGTGAAGGCGGCGGTGGTGCTACAAACAAGCTCATCTTT	TRAC	TRBV6-1	TRBJ2-7	TGTGCCAGCAGTGACCCTCGCGAGCAGTACTTC	1	Blood	10907	FALSE	FALSE	FALSE
GGTGTTATCAACACTG-1-P190604_Blood_1	clone_P190604:10755:1	P190604	P190604_TRAV5_TGTGCAGAGGTCGTCAGGAATGCAGGCAACATGCTCACCTTT_TRAJ39:P190604_TRBV19_TGTGCCAGTAGTACCGGGACTAGCGGGATCGATGAGCAGTTCTTC_TRBJ2-1	TRAC	TRAV5	TRAJ39	TGTGCAGAGGTCGTCAGGAATGCAGGCAACATGCTCACCTTT	TRAC	TRBV19	TRBJ2-1	TGTGCCAGTAGTACCGGGACTAGCGGGATCGATGAGCAGTTCTTC	1	Blood	10755	FALSE	FALSE	FALSE
GTAACGTAGACACGAC-1-P190604_Blood_1	clone_P190604:10540:1	P190604	P190604_TRAV3_TGTGCTGTGAGGAATGCCAGACTCATGTTT_TRAJ31:P190604_TRBV28_TGTGCCAGCAGTTACTCTCCGGGACAGGGGGACTACGAGCAGTACTTC_TRBJ2-7	TRAC	TRAV3	TRAJ31	TGTGCTGTGAGGAATGCCAGACTCATGTTT	TRAC	TRBV28	TRBJ2-7	TGTGCCAGCAGTTACTCTCCGGGACAGGGGGACTACGAGCAGTACTTC	1	Blood	10540	FALSE	FALSE	FALSE
GTAACGTGTACCTACA-1-P190604_Blood_1	clone_P190604:10421:60	P190604	P190604_TRAV29/DV5_TGTGCAGCAAGCGCCCATAGTGGAGGTAGCAACTATAAACTGACATTT_TRAJ53:P190604_TRBV7-9_TGTGCCACCAGATTAGGGTACGAGCAGTACTTC_TRBJ2-7	TRAC	TRAV29/DV5	TRAJ53	TGTGCAGCAAGCGCCCATAGTGGAGGTAGCAACTATAAACTGACATTT	TRAC	TRBV7-9	TRBJ2-7	TGTGCCACCAGATTAGGGTACGAGCAGTACTTC	60	Blood	10421	TRUE	FALSE	FALSE
GTACGTAAGACACGAC-1-P190604_Blood_1	clone_P190604:10375:1	P190604	P190604_TRAV27_TGTGCAGGAGCCGTAAGAGGCTCAACCCTGGGGAGGCTATACTTT_TRAJ18:P190604_TRBV11-3_TGTGCCAGCAGCTTCTCCAGCCCCAATGAGCAGTTCTTC_TRBJ2-1	TRAC	TRAV27	TRAJ18	TGTGCAGGAGCCGTAAGAGGCTCAACCCTGGGGAGGCTATACTTT	TRAC	TRBV11-3	TRBJ2-1	TGTGCCAGCAGCTTCTCCAGCCCCAATGAGCAGTTCTTC	1	Blood	10375	FALSE	FALSE	FALSE
GTACGTAAGATATGCA-1-P190604_Blood_1	clone_P190604:10656:1	P190604	P190604_TRAV39_TGTGCCGGGAATTCAGGAAACACACCTCTTGTCTTT_TRAJ29:P190604_TRBV28_TGTGCCAGCAGTTCCGGGACTAGCGGGGAGTTCGTTACGCAGTATTTT_TRBJ2-3	TRAC	TRAV39	TRAJ29	TGTGCCGGGAATTCAGGAAACACACCTCTTGTCTTT	TRAC	TRBV28	TRBJ2-3	TGTGCCAGCAGTTCCGGGACTAGCGGGGAGTTCGTTACGCAGTATTTT	1	Blood	10656	FALSE	FALSE	FALSE
GTACTCCGTAAACACA-1-P190604_Blood_1	clone_P190604:9301:1	P190604	P190604_TRAV1-1_TGCGCTGTGAGAGATAGCAACTATCAGTTAATCTGG_TRAJ33:P190604_TRBV28_TGTGCCAGCAGTACAGGGGTCCAGGACTACGAGCAGTACTTC_TRBJ2-7	TRAC	TRAV1-1	TRAJ33	TGCGCTGTGAGAGATAGCAACTATCAGTTAATCTGG	TRAC	TRBV28	TRBJ2-7	TGTGCCAGCAGTACAGGGGTCCAGGACTACGAGCAGTACTTC	1	Blood	9301	FALSE	FALSE	FALSE
GTACTTTGTCAGAGGT-1-P190604_Blood_1	clone_P190604:9742:1	P190604	P190604_TRAV13-1_TGTGCAGCAAGTGGGACTGGAGGCTTCAAAACTATCTTT_TRAJ9:P190604_TRBV27_TGTGCCAGCAGGAGTACAGGGGTGGAGACCCAGTACTTC_TRBJ2-5	TRAC	TRAV13-1	TRAJ9	TGTGCAGCAAGTGGGACTGGAGGCTTCAAAACTATCTTT	TRAC	TRBV27	TRBJ2-5	TGTGCCAGCAGGAGTACAGGGGTGGAGACCCAGTACTTC	1	Blood	9742	FALSE	FALSE	FALSE
GTACTTTTCCCAGGTG-1-P190604_Blood_1	clone_P190604:10654:2	P190604	P190604_TRAV38-2/DV8_TGTGCTTCCAAGAACAGAGATGACAAGATCATCTTT_TRAJ30:P190604_TRBV9_TGTGCCAGCAGCGTCGGGACAATGAACACCGGGGAGCTGTTTTTT_TRBJ2-2	TRAC	TRAV38-2/DV8	TRAJ30	TGTGCTTCCAAGAACAGAGATGACAAGATCATCTTT	TRAC	TRBV9	TRBJ2-2	TGTGCCAGCAGCGTCGGGACAATGAACACCGGGGAGCTGTTTTTT	2	Blood	10654	TRUE	FALSE	FALSE
GTAGGCCTCAGTTCGA-1-P190604_Blood_1	clone_P190604:10421:60	P190604	P190604_TRAV29/DV5_TGTGCAGCAAGCGCCCATAGTGGAGGTAGCAACTATAAACTGACATTT_TRAJ53:P190604_TRBV7-9_TGTGCCACCAGATTAGGGTACGAGCAGTACTTC_TRBJ2-7	TRAC	TRAV29/DV5	TRAJ53	TGTGCAGCAAGCGCCCATAGTGGAGGTAGCAACTATAAACTGACATTT	TRAC	TRBV7-9	TRBJ2-7	TGTGCCACCAGATTAGGGTACGAGCAGTACTTC	60	Blood	10421	TRUE	FALSE	FALSE
GTAGTCAAGCAGCGTA-1-P190604_Blood_1	clone_P190604:10206:1	P190604	P190604_TRAV23/DV6_TGTGCAGCAACGGATAACTATGGTCAGAATTTTGTCTTT_TRAJ26:P190604_TRBV28_TGTGCCAGCACAGGGACACAGTACCAAGAGACCCAGTACTTC_TRBJ2-5	TRAC	TRAV23/DV6	TRAJ26	TGTGCAGCAACGGATAACTATGGTCAGAATTTTGTCTTT	TRAC	TRBV28	TRBJ2-5	TGTGCCAGCACAGGGACACAGTACCAAGAGACCCAGTACTTC	1	Blood	10206	FALSE	FALSE	FALSE
GTAGTCAAGTCGTTTG-1-P190604_Blood_1	clone_P190604:10182:1	P190604	P190604_TRAV22_TGTGCTGCCAACACCGACATGCGCTTT_TRAJ43:P190604_TRBV11-2_TGTGCCAGCAGCTTATTTAGTGAAGGTGAAGCTTTCTTT_TRBJ1-1	TRAC	TRAV22	TRAJ43	TGTGCTGCCAACACCGACATGCGCTTT	TRAC	TRBV11-2	TRBJ1-1	TGTGCCAGCAGCTTATTTAGTGAAGGTGAAGCTTTCTTT	1	Blood	10182	FALSE	FALSE	FALSE
GTAGTCACACATTCGA-1-P190604_Blood_1	clone_P190604:9780:1	P190604	P190604_TRAV13-2_TGTGCAGAGAATCAAGTGGGAGGAAGCTACATACCTACATTT_TRAJ6:P190604_TRBV15_TGTGCCACCAGCAGTGATTTGACAGGGGCCCGAGAGACCCAGTACTTC_TRBJ2-5	TRAC	TRAV13-2	TRAJ6	TGTGCAGAGAATCAAGTGGGAGGAAGCTACATACCTACATTT	TRAC	TRBV15	TRBJ2-5	TGTGCCACCAGCAGTGATTTGACAGGGGCCCGAGAGACCCAGTACTTC	1	Blood	9780	FALSE	FALSE	FALSE
GTATTCTAGGCAGTCA-1-P190604_Blood_1	clone_P190604:10739:1	P190604	P190604_TRAV5_TGTGCAGAGAGTACCACCGGTAACCAGTTCTATTTT_TRAJ49:P190604_TRBV20-1_TGCAGTGCTAGACCCGGGACAGGGGCCTACGAGCAGTACTTC_TRBJ2-7	TRAC	TRAV5	TRAJ49	TGTGCAGAGAGTACCACCGGTAACCAGTTCTATTTT	TRAC	TRBV20-1	TRBJ2-7	TGCAGTGCTAGACCCGGGACAGGGGCCTACGAGCAGTACTTC	1	Blood	10739	FALSE	FALSE	FALSE
GTATTCTAGTAGCCGA-1-P190604_Blood_1	clone_P190604:10687:1	P190604	P190604_TRAV4_TGCCTCGTGGGTGATCCGAACACAGGCTTTCAGAAACTTGTATTT_TRAJ8:P190604_TRBV5-6_TGTGCCAGCAGCTTGCGGGGAGAGGACTATGGCTACACCTTC_TRBJ1-2	TRAC	TRAV4	TRAJ8	TGCCTCGTGGGTGATCCGAACACAGGCTTTCAGAAACTTGTATTT	TRAC	TRBV5-6	TRBJ1-2	TGTGCCAGCAGCTTGCGGGGAGAGGACTATGGCTACACCTTC	1	Blood	10687	FALSE	FALSE	FALSE
GTATTCTCAGCTTCGG-1-P190604_Blood_1	clone_P190604:10751:1	P190604	P190604_TRAV5_TGTGCAGAGATGTTCTCTGGGGGTTACCAGAAAGTTACCTTT_TRAJ13:P190604_TRBV27_TGTGCCAGCAGTACCCGTGGGGGGGCCTACGAGCAGTACTTC_TRBJ2-7	TRAC	TRAV5	TRAJ13	TGTGCAGAGATGTTCTCTGGGGGTTACCAGAAAGTTACCTTT	TRAC	TRBV27	TRBJ2-7	TGTGCCAGCAGTACCCGTGGGGGGGCCTACGAGCAGTACTTC	1	Blood	10751	FALSE	FALSE	FALSE
GTATTCTTCTCGGACG-1-P190604_Blood_1	clone_P190604:10604:1	P190604	P190604_TRAV38-1_TGTGCTCTGACCTCCTACGACAAGGTGATATTT_TRAJ50:P190604_TRBV5-1_TGCGCCAGCAGCTTTTATGGACAGATCTACACTGAAGCTTTCTTT_TRBJ1-1	TRAC	TRAV38-1	TRAJ50	TGTGCTCTGACCTCCTACGACAAGGTGATATTT	TRAC	TRBV5-1	TRBJ1-1	TGCGCCAGCAGCTTTTATGGACAGATCTACACTGAAGCTTTCTTT	1	Blood	10604	FALSE	FALSE	FALSE
GTCAAGTAGGTGGGTT-1-P190604_Blood_1	clone_P190604:10073:1	P190604	P190604_TRAV20_TGTGCTGTGCACGGGTACAGCAGTGCTTCCAAGATAATCTTT_TRAJ3:P190604_TRBV2_TGTGCCAGCAGTGGGGGGGGCCAAGAGGGCAATCAGCCCCAGCATTTT_TRBJ1-5	TRAC	TRAV20	TRAJ3	TGTGCTGTGCACGGGTACAGCAGTGCTTCCAAGATAATCTTT	TRAC	TRBV2	TRBJ1-5	TGTGCCAGCAGTGGGGGGGGCCAAGAGGGCAATCAGCCCCAGCATTTT	1	Blood	10073	FALSE	FALSE	FALSE
GTCACAAAGACTAAGT-1-P190604_Blood_1	clone_P190604:10598:1	P190604	P190604_TRAV36/DV7_TGTGCTGTGGAGAGGAATTATGGAGGAAGCCAAGGAAATCTCATCTTT_TRAJ42:P190604_TRBV28_TGTGCCAGCAGTCCTCAGGGGGCGCCGAGATCACCCCTCCACTTT_TRBJ1-6	TRAC	TRAV36/DV7	TRAJ42	TGTGCTGTGGAGAGGAATTATGGAGGAAGCCAAGGAAATCTCATCTTT	TRAC	TRBV28	TRBJ1-6	TGTGCCAGCAGTCCTCAGGGGGCGCCGAGATCACCCCTCCACTTT	1	Blood	10598	FALSE	FALSE	FALSE
GTCACAAAGCTGCGAA-1-P190604_Blood_1	clone_P190604:9569:1	P190604	P190604_TRAV12-2_TGTGCCGCCACATTTATGGATAGCAACTATCAGTTAATCTGG_TRAJ33:P190604_TRBV6-2_TGTGCCAGCAGTAAAGCGGTCACGCAGTATTTT_TRBJ2-3	TRAC	TRAV12-2	TRAJ33	TGTGCCGCCACATTTATGGATAGCAACTATCAGTTAATCTGG	TRAC	TRBV6-2	TRBJ2-3	TGTGCCAGCAGTAAAGCGGTCACGCAGTATTTT	1	Blood	9569	FALSE	FALSE	FALSE
GTCACAACAGGATTGG-1-P190604_Blood_1	clone_P190604:10358:1	P190604	P190604_TRAV27_TGTGCAGCCTATAACCAGGGAGGAAAGCTTATCTTC_TRAJ23:P190604_TRBV12-4_TGTGCCAGCAGTTTAGCCGGGATGAACACTGAAGCTTTCTTT_TRBJ1-1	TRAC	TRAV27	TRAJ23	TGTGCAGCCTATAACCAGGGAGGAAAGCTTATCTTC	TRAC	TRBV12-4	TRBJ1-1	TGTGCCAGCAGTTTAGCCGGGATGAACACTGAAGCTTTCTTT	1	Blood	10358	FALSE	FALSE	FALSE
GTCACAACATAAAGGT-1-P190604_Blood_1	clone_P190604:10222:26	P190604	P190604_TRAV23/DV6_TGTGCAGCAAGGGACACCGACAAGCTCATCTTT_TRAJ34:P190604_TRBV7-3_TGTGCCAGCAGCTTAAGACAGGGCGTGGAGGATACGCAGTATTTT_TRBJ2-3	TRAC	TRAV23/DV6	TRAJ34	TGTGCAGCAAGGGACACCGACAAGCTCATCTTT	TRAC	TRBV7-3	TRBJ2-3	TGTGCCAGCAGCTTAAGACAGGGCGTGGAGGATACGCAGTATTTT	26	Blood	10222	TRUE	FALSE	FALSE
GTCACGGGTTGAGGTG-1-P190604_Blood_1	clone_P190604:10759:1	P190604	P190604_TRAV6_TGTGCTCTACGGGGTAGTGGAGGTAGCAACTATAAACTGACATTT_TRAJ53:P190604_TRBV29-1_TGCAGCGCCGCAGGACAGGGGTTTTGGGAGACCCAGTACTTC_TRBJ2-5	TRAC	TRAV6	TRAJ53	TGTGCTCTACGGGGTAGTGGAGGTAGCAACTATAAACTGACATTT	TRAC	TRBV29-1	TRBJ2-5	TGCAGCGCCGCAGGACAGGGGTTTTGGGAGACCCAGTACTTC	1	Blood	10759	FALSE	FALSE	FALSE
GTCACGGTCGTAGGTT-1-P190604_Blood_1	clone_P190604:9475:7	P190604	P190604_TRAV1-2_TGTGCTGTTATGGATAGCAACTATCAGTTAATCTGG_TRAJ33:P190604_TRBV4-3_TGCGCCAGCAGCCAAGGACTAGCGGGTCAGGGGTCAGATACGCAGTATTTT_TRBJ2-3	TRAC	TRAV1-2	TRAJ33	TGTGCTGTTATGGATAGCAACTATCAGTTAATCTGG	TRAC	TRBV4-3	TRBJ2-3	TGCGCCAGCAGCCAAGGACTAGCGGGTCAGGGGTCAGATACGCAGTATTTT	7	Blood	9475	TRUE	TRUE	FALSE
GTCATTTTCCAGAGGA-1-P190604_Blood_1	clone_P190604:10222:26	P190604	P190604_TRAV23/DV6_TGTGCAGCAAGGGACACCGACAAGCTCATCTTT_TRAJ34:P190604_TRBV7-3_TGTGCCAGCAGCTTAAGACAGGGCGTGGAGGATACGCAGTATTTT_TRBJ2-3	TRAC	TRAV23/DV6	TRAJ34	TGTGCAGCAAGGGACACCGACAAGCTCATCTTT	TRAC	TRBV7-3	TRBJ2-3	TGTGCCAGCAGCTTAAGACAGGGCGTGGAGGATACGCAGTATTTT	26	Blood	10222	TRUE	FALSE	FALSE
GTCGGGTAGGGCTTCC-1-P190604_Blood_1	clone_P190604:10067:1	P190604	P190604_TRAV20_TGTGCTGCGTCACATTATGGTGGTGCTACAAACAAGCTCATCTTT_TRAJ32:P190604_TRBV6-5_TGTGCCAGCAGCAGAGACAGCTCTGGGGCCAACGTCCTGACTTTC_TRBJ2-6	TRAC	TRAV20	TRAJ32	TGTGCTGCGTCACATTATGGTGGTGCTACAAACAAGCTCATCTTT	TRAC	TRBV6-5	TRBJ2-6	TGTGCCAGCAGCAGAGACAGCTCTGGGGCCAACGTCCTGACTTTC	1	Blood	10067	FALSE	FALSE	FALSE
GTCGTAAGTGGCCCTA-1-P190604_Blood_1	clone_P190604:9863:1	P190604	P190604_TRAV14/DV4_TGTGCATTCATCATGGATAGCAACTATCAGTTAATCTGG_TRAJ33:P190604_TRBV7-9_TGTGCCAGCAGCTTATCAGGGAACACTGAAGCTTTCTTT_TRBJ1-1	TRAC	TRAV14/DV4	TRAJ33	TGTGCATTCATCATGGATAGCAACTATCAGTTAATCTGG	TRAC	TRBV7-9	TRBJ1-1	TGTGCCAGCAGCTTATCAGGGAACACTGAAGCTTTCTTT	1	Blood	9863	FALSE	FALSE	FALSE
GTCGTAAGTGTGTGCC-1-P190604_Blood_1	clone_P190604:9313:1	P190604	P190604_TRAV1-1_TGCGCTGTGCCTATAGGCTTTGGGAATGTGCTGCATTGC_TRAJ35:P190604_TRBV12-3_TGTGCCAGCACCTTGTCCAGGGGTAACGGCAATCAGCCCCAGCATTTT_TRBJ1-5	TRAC	TRAV1-1	TRAJ35	TGCGCTGTGCCTATAGGCTTTGGGAATGTGCTGCATTGC	TRAC	TRBV12-3	TRBJ1-5	TGTGCCAGCACCTTGTCCAGGGGTAACGGCAATCAGCCCCAGCATTTT	1	Blood	9313	FALSE	FALSE	FALSE
GTCGTAATCCTTTCGG-1-P190604_Blood_1	clone_P190604:10646:1	P190604	P190604_TRAV38-2/DV8_TGTGCTTATGAAGAAACCAGTGGCTCTAGGTTGACCTTT_TRAJ58:P190604_TRBV5-8_TGTGCCAGCAGCTCAGGACTAGCGGGAGCCCACGAGCAGTACTTC_TRBJ2-7	TRAC	TRAV38-2/DV8	TRAJ58	TGTGCTTATGAAGAAACCAGTGGCTCTAGGTTGACCTTT	TRAC	TRBV5-8	TRBJ2-7	TGTGCCAGCAGCTCAGGACTAGCGGGAGCCCACGAGCAGTACTTC	1	Blood	10646	FALSE	FALSE	FALSE
GTCGTAATCTCCAGGG-1-P190604_Blood_1	clone_P190604:10115:29	P190604	P190604_TRAV21_TGTGCTGCGGGGATGGATAGCAACTATCAGTTAATCTGG_TRAJ33:P190604_TRBV27_TGTGCCAGCAGTCCTCGGACAGGGACCGGCGAGCAGTACTTC_TRBJ2-7	TRAC	TRAV21	TRAJ33	TGTGCTGCGGGGATGGATAGCAACTATCAGTTAATCTGG	TRAC	TRBV27	TRBJ2-7	TGTGCCAGCAGTCCTCGGACAGGGACCGGCGAGCAGTACTTC	29	Blood	10115	TRUE	FALSE	FALSE
GTCTCGTCAGTCAGAG-1-P190604_Blood_1	clone_P190604:10983:20	P190604	P190604_TRAV9-2_TGTGCTCTGAGAAATACTGGAGGCTTCAAAACTATCTTT_TRAJ9:P190604_TRBV7-2_TGTGCCAGCAGCTCCGAAGCCAATCAGCCCCAGCATTTT_TRBJ1-5	TRAC	TRAV9-2	TRAJ9	TGTGCTCTGAGAAATACTGGAGGCTTCAAAACTATCTTT	TRAC	TRBV7-2	TRBJ1-5	TGTGCCAGCAGCTCCGAAGCCAATCAGCCCCAGCATTTT	20	Blood	10983	TRUE	FALSE	FALSE
GTCTTCGCAACTGCGC-1-P190604_Blood_1	clone_P190604:9374:1	P190604	P190604_TRAV1-2_TGTGCTGTGAGAGATACGACTGGTGGCTACAATAAGCTGATTTTT_TRAJ4:P190604_TRBV10-3_TGTGCCATCAGTGAGTCGGGTGCGGACGAGCAGTACTTC_TRBJ2-7	TRAC	TRAV1-2	TRAJ4	TGTGCTGTGAGAGATACGACTGGTGGCTACAATAAGCTGATTTTT	TRAC	TRBV10-3	TRBJ2-7	TGTGCCATCAGTGAGTCGGGTGCGGACGAGCAGTACTTC	1	Blood	9374	FALSE	FALSE	FALSE
GTCTTCGTCCTATTCA-1-P190604_Blood_1	clone_P190604:10296:1	P190604	P190604_TRAV26-1_TGCATCGTCAGACCAAATTATGGAGGAAGCCAAGGAAATCTCATCTTT_TRAJ42:P190604_TRBV9_TGTGCCAGCAGCGTAGCGGGCCAGAGCTCTGGGGCCAACGTCCTGACTTTC_TRBJ2-6	TRAC	TRAV26-1	TRAJ42	TGCATCGTCAGACCAAATTATGGAGGAAGCCAAGGAAATCTCATCTTT	TRAC	TRBV9	TRBJ2-6	TGTGCCAGCAGCGTAGCGGGCCAGAGCTCTGGGGCCAACGTCCTGACTTTC	1	Blood	10296	FALSE	FALSE	FALSE
GTGAAGGCAGTAAGAT-1-P190604_Blood_1	clone_P190604:10820:1	P190604	P190604_TRAV8-2_TGTGTTGTGAGTTGGGACTATGGTCAGAATTTTGTCTTT_TRAJ26:P190604_TRBV28_TGTGCCAGCAGCCCAACGGGGGGCCTGGGCACCTACGAGCAGTACTTC_TRBJ2-7	TRAC	TRAV8-2	TRAJ26	TGTGTTGTGAGTTGGGACTATGGTCAGAATTTTGTCTTT	TRAC	TRBV28	TRBJ2-7	TGTGCCAGCAGCCCAACGGGGGGCCTGGGCACCTACGAGCAGTACTTC	1	Blood	10820	FALSE	FALSE	FALSE
GTGAAGGGTACTTGAC-1-P190604_Blood_1	clone_P190604:9545:1	P190604	P190604_TRAV12-1_TGTGTGGTGACTTCCTCTAGCAACACAGGCAAACTAATCTTT_TRAJ37:P190604_TRBV28_TGTGCCAGCAGCCCCCTGTGGGACAGGGTATACGAGCAGTACTTC_TRBJ2-7	TRAC	TRAV12-1	TRAJ37	TGTGTGGTGACTTCCTCTAGCAACACAGGCAAACTAATCTTT	TRAC	TRBV28	TRBJ2-7	TGTGCCAGCAGCCCCCTGTGGGACAGGGTATACGAGCAGTACTTC	1	Blood	9545	FALSE	FALSE	FALSE
GTGCAGCCAATGGAGC-1-P190604_Blood_1	clone_P190604:10094:1	P190604	P190604_TRAV20_TGTGCTGTGCCGGCTAATAAAGGAGGTGCTGACGGACTCACCTTT_TRAJ45:P190604_TRBV20-1_TGCAGTGCCAGGGGAGCCTACGAGCAGTACTTC_TRBJ2-7	TRAC	TRAV20	TRAJ45	TGTGCTGTGCCGGCTAATAAAGGAGGTGCTGACGGACTCACCTTT	TRAC	TRBV20-1	TRBJ2-7	TGCAGTGCCAGGGGAGCCTACGAGCAGTACTTC	1	Blood	10094	FALSE	FALSE	FALSE
GTGCAGCGTTCTGGTA-1-P190604_Blood_1	clone_P190604:10366:1	P190604	P190604_TRAV27_TGTGCAGGAGAAAGGGATAGCAACTATCAGTTAATCTGG_TRAJ33:P190604_TRBV6-1_TGTGCCAGCGCCCGAGGGGGGGTGGGGCAAGAGACCCAGTACTTC_TRBJ2-5	TRAC	TRAV27	TRAJ33	TGTGCAGGAGAAAGGGATAGCAACTATCAGTTAATCTGG	TRAC	TRBV6-1	TRBJ2-5	TGTGCCAGCGCCCGAGGGGGGGTGGGGCAAGAGACCCAGTACTTC	1	Blood	10366	FALSE	FALSE	FALSE
GTGCGGTAGGGTGTGT-1-P190604_Blood_1	clone_P190604:10427:4	P190604	P190604_TRAV29/DV5_TGTGCAGCAAGCGCGAGAACAGGAGGAGGTGCTGACGGACTCACCTTT_TRAJ45:P190604_TRBV9_TGTGCCAGCAGCGGGAGCGGGATTTTAGGCAATGAGCAGTTCTTC_TRBJ2-1	TRAC	TRAV29/DV5	TRAJ45	TGTGCAGCAAGCGCGAGAACAGGAGGAGGTGCTGACGGACTCACCTTT	TRAC	TRBV9	TRBJ2-1	TGTGCCAGCAGCGGGAGCGGGATTTTAGGCAATGAGCAGTTCTTC	4	Blood	10427	TRUE	FALSE	FALSE
GTGCGGTCACAGTCGC-1-P190604_Blood_1	clone_P190604:10760:1	P190604	P190604_TRAV6_TGTGCTCTAGAAGACGAGAACACAGGCTTTCAGAAACTTGTATTT_TRAJ8:P190604_TRBV18_TGTGCCAGCTCACCCACAGGGGGCGAACAGCCCCAGCATTTT_TRBJ1-5	TRAC	TRAV6	TRAJ8	TGTGCTCTAGAAGACGAGAACACAGGCTTTCAGAAACTTGTATTT	TRAC	TRBV18	TRBJ1-5	TGTGCCAGCTCACCCACAGGGGGCGAACAGCCCCAGCATTTT	1	Blood	10760	FALSE	FALSE	FALSE
GTGCGGTTCACTTACT-1-P190604_Blood_1	clone_P190604:10301:1	P190604	P190604_TRAV26-1_TGCATCGTCAGAGATGACAAAGCTGCAGGCAACAAGCTAACTTTT_TRAJ17:P190604_TRBV4-1_TGCGCCAGCAGCTATAGCGGGAGGACGAACACCGGGGAGCTGTTTTTT_TRBJ2-2	TRAC	TRAV26-1	TRAJ17	TGCATCGTCAGAGATGACAAAGCTGCAGGCAACAAGCTAACTTTT	TRAC	TRBV4-1	TRBJ2-2	TGCGCCAGCAGCTATAGCGGGAGGACGAACACCGGGGAGCTGTTTTTT	1	Blood	10301	FALSE	FALSE	FALSE
GTGCTTCTCTATCCTA-1-P190604_Blood_1	clone_P190604:10698:1	P190604	P190604_TRAV4_TGCCTCGTTTTCGGTGGCTACAATAAGCTGATTTTT_TRAJ4:P190604_TRBV6-1_TGTGCCAGCAGCCCATCCGGGACAGGCGGATTGAATAATTCACCCCTCCACTTT_TRBJ1-6	TRAC	TRAV4	TRAJ4	TGCCTCGTTTTCGGTGGCTACAATAAGCTGATTTTT	TRAC	TRBV6-1	TRBJ1-6	TGTGCCAGCAGCCCATCCGGGACAGGCGGATTGAATAATTCACCCCTCCACTTT	1	Blood	10698	FALSE	FALSE	FALSE
GTGGGTCCACAAGCCC-1-P190604_Blood_1	clone_P190604:10768:2	P190604	P190604_TRAV6_TGTGCTCTAGATACGGATAGCAGCTATAAATTGATCTTC_TRAJ12:P190604_TRBV5-1_TGCGCCAGCAGCCCGCCAGGAGAGATTCAGTACTTC_TRBJ2-4	TRAC	TRAV6	TRAJ12	TGTGCTCTAGATACGGATAGCAGCTATAAATTGATCTTC	TRAC	TRBV5-1	TRBJ2-4	TGCGCCAGCAGCCCGCCAGGAGAGATTCAGTACTTC	2	Blood	10768	TRUE	FALSE	FALSE
GTGTGCGCACAGGTTT-1-P190604_Blood_1	clone_P190604:10570:1	P190604	P190604_TRAV35_TGTGCTGGAATAGGAGGAAGCTACATACCTACATTT_TRAJ6:P190604_TRBV9_TGTGCCAGCAGCGTAGGGCCGGATAATGAAAAACTGTTTTTT_TRBJ1-4	TRAC	TRAV35	TRAJ6	TGTGCTGGAATAGGAGGAAGCTACATACCTACATTT	TRAC	TRBV9	TRBJ1-4	TGTGCCAGCAGCGTAGGGCCGGATAATGAAAAACTGTTTTTT	1	Blood	10570	FALSE	FALSE	FALSE
GTGTTAGAGAAACCGC-1-P190604_Blood_1	clone_P190604:9747:1	P190604	P190604_TRAV13-1_TGTGCAGCAAGTTTCCTCACCGGTAACCAGTTCTATTTT_TRAJ49:P190604_TRBV7-3_TGTGCCAGCAGCTCGGGGGGGGGGCTCACAGATACGCAGTATTTT_TRBJ2-3	TRAC	TRAV13-1	TRAJ49	TGTGCAGCAAGTTTCCTCACCGGTAACCAGTTCTATTTT	TRAC	TRBV7-3	TRBJ2-3	TGTGCCAGCAGCTCGGGGGGGGGGCTCACAGATACGCAGTATTTT	1	Blood	9747	FALSE	FALSE	FALSE
GTGTTAGAGTACACCT-1-P190604_Blood_1	clone_P190604:10215:1	P190604	P190604_TRAV23/DV6_TGTGCAGCAAGCATTCGAGGGAATGCCAGACTCATGTTT_TRAJ31:P190604_TRBV7-8_TGTGCCAGCAGCTTAGGCTTGGGCAACACTGAAGCTTTCTTT_TRBJ1-1	TRAC	TRAV23/DV6	TRAJ31	TGTGCAGCAAGCATTCGAGGGAATGCCAGACTCATGTTT	TRAC	TRBV7-8	TRBJ1-1	TGTGCCAGCAGCTTAGGCTTGGGCAACACTGAAGCTTTCTTT	1	Blood	10215	FALSE	FALSE	FALSE
GTGTTAGGTCTCTCGT-1-P190604_Blood_1	clone_P190604:10091:1	P190604	P190604_TRAV20_TGTGCTGTGCAGGTCCCACAGGCTGGCAACAACCGTAAGCTGATTTGG_TRAJ38:P190604_TRBV20-1_TGCAGTGCTAGAGACAGGGGAATCAGTAGTCAGCCCCAGCATTTT_TRBJ1-5	TRAC	TRAV20	TRAJ38	TGTGCTGTGCAGGTCCCACAGGCTGGCAACAACCGTAAGCTGATTTGG	TRAC	TRBV20-1	TRBJ1-5	TGCAGTGCTAGAGACAGGGGAATCAGTAGTCAGCCCCAGCATTTT	1	Blood	10091	FALSE	FALSE	FALSE
GTTCATTAGACTTGAA-1-P190604_Blood_1	clone_P190604:10982:1	P190604	P190604_TRAV9-2_TGTGCTCTGACCGCTTTTGGAAATGAGAAATTAACCTTT_TRAJ48:P190604_TRBV9_TGTGCCAGCAGCGCCCTAGCGGGGTCTCAAGAGACCCAGTACTTC_TRBJ2-5	TRAC	TRAV9-2	TRAJ48	TGTGCTCTGACCGCTTTTGGAAATGAGAAATTAACCTTT	TRAC	TRBV9	TRBJ2-5	TGTGCCAGCAGCGCCCTAGCGGGGTCTCAAGAGACCCAGTACTTC	1	Blood	10982	FALSE	FALSE	FALSE
GTTCGGGGTGATGTGG-1-P190604_Blood_1	clone_P190604:10745:1	P190604	P190604_TRAV5_TGTGCAGAGAGTATGGGTGGAGGTGCTGACGGACTCACCTTT_TRAJ45:P190604_TRBV9_TGTGCCAGCAGCGTAGGTTTTCCAGGGCTAGATACGCAGTATTTT_TRBJ2-3	TRAC	TRAV5	TRAJ45	TGTGCAGAGAGTATGGGTGGAGGTGCTGACGGACTCACCTTT	TRAC	TRBV9	TRBJ2-3	TGTGCCAGCAGCGTAGGTTTTCCAGGGCTAGATACGCAGTATTTT	1	Blood	10745	FALSE	FALSE	FALSE
GTTCTCGAGACTAGGC-1-P190604_Blood_1	clone_P190604:11012:1	P190604	P190604_TRAV9-2_TGTGCTCTGAGTGATCAGGGAACCGGGTATGCACTCAACTTC_TRAJ41:P190604_TRBV18_TGTGCCAGCTCACCACTACGACAGTTCCAAGAGACCCAGTACTTC_TRBJ2-5	TRAC	TRAV9-2	TRAJ41	TGTGCTCTGAGTGATCAGGGAACCGGGTATGCACTCAACTTC	TRAC	TRBV18	TRBJ2-5	TGTGCCAGCTCACCACTACGACAGTTCCAAGAGACCCAGTACTTC	1	Blood	11012	FALSE	FALSE	FALSE
GTTCTCGGTATGAAAC-1-P190604_Blood_1	clone_P190604:10950:1	P190604	P190604_TRAV8-6_TGTGCTGTGAGTGAGATGAGTACTGGAGGCTTCAAAACTATCTTT_TRAJ9:P190604_TRBV19_TGTGCCAGTACTCCCCAGGGGTCCAGACAGCCCCAGCATTTT_TRBJ1-5	TRAC	TRAV8-6	TRAJ9	TGTGCTGTGAGTGAGATGAGTACTGGAGGCTTCAAAACTATCTTT	TRAC	TRBV19	TRBJ1-5	TGTGCCAGTACTCCCCAGGGGTCCAGACAGCCCCAGCATTTT	1	Blood	10950	FALSE	FALSE	FALSE
TAAACCGGTGACGGTA-1-P190604_Blood_1	clone_P190604:9498:1	P190604	P190604_TRAV10_TGTGTGGTTTCCTCAGGAACCTACAAATACATCTTT_TRAJ40:P190604_TRBV7-9_TGTGCCAGCAGCTTAGCCGGGACAGGGATGGGCACAGATACGCAGTATTTT_TRBJ2-3	TRAC	TRAV10	TRAJ40	TGTGTGGTTTCCTCAGGAACCTACAAATACATCTTT	TRAC	TRBV7-9	TRBJ2-3	TGTGCCAGCAGCTTAGCCGGGACAGGGATGGGCACAGATACGCAGTATTTT	1	Blood	9498	FALSE	FALSE	FALSE
TAAGAGATCAGCTGGC-1-P190604_Blood_1	clone_P190604:10617:1	P190604	P190604_TRAV38-1_TGTGCTTTCATTTCAGGAGGAGGTGCTGACGGACTCACCTTT_TRAJ45:P190604_TRBV12-3_TGTGCCAGCACCCCCGGGAGGGGGGAAAACATTCAGTACTTC_TRBJ2-4	TRAC	TRAV38-1	TRAJ45	TGTGCTTTCATTTCAGGAGGAGGTGCTGACGGACTCACCTTT	TRAC	TRBV12-3	TRBJ2-4	TGTGCCAGCACCCCCGGGAGGGGGGAAAACATTCAGTACTTC	1	Blood	10617	FALSE	FALSE	FALSE
TAAGCGTCAGGTGCCT-1-P190604_Blood_1	clone_P190604:10360:1	P190604	P190604_TRAV27_TGTGCAGGAATCACCGGTAACCAGTTCTATTTT_TRAJ49:P190604_TRBV20-1_TGCAGTGTTCCGGGACAGGCCCTTGTCGAGCAGTACTTC_TRBJ2-7	TRAC	TRAV27	TRAJ49	TGTGCAGGAATCACCGGTAACCAGTTCTATTTT	TRAC	TRBV20-1	TRBJ2-7	TGCAGTGTTCCGGGACAGGCCCTTGTCGAGCAGTACTTC	1	Blood	10360	FALSE	FALSE	FALSE
TACACGAAGACGCAAC-1-P190604_Blood_1	clone_P190604:11028:1	P190604	P190604_TRAV9-2_TGTGCTCTGAGTGTAGATTCAGGAAACACACCTCTTGTCTTT_TRAJ29:P190604_TRBV9_TGTGCCAGCAGCGTAGTGGCAGGGAGGAACACCATATATTTT_TRBJ1-3	TRAC	TRAV9-2	TRAJ29	TGTGCTCTGAGTGTAGATTCAGGAAACACACCTCTTGTCTTT	TRAC	TRBV9	TRBJ1-3	TGTGCCAGCAGCGTAGTGGCAGGGAGGAACACCATATATTTT	1	Blood	11028	FALSE	FALSE	FALSE
TACACGAGTAGAAGGA-1-P190604_Blood_1	clone_P190604:10670:1	P190604	P190604_TRAV4_TGCCTCGTGGGCGACTTCTCTAGCAACACAGGCAAACTAATCTTT_TRAJ37:P190604_TRBV2_TGTGCCAGCAGTGAAGGGGCGGGAAGCACAGATACGCAGTATTTT_TRBJ2-3	TRAC	TRAV4	TRAJ37	TGCCTCGTGGGCGACTTCTCTAGCAACACAGGCAAACTAATCTTT	TRAC	TRBV2	TRBJ2-3	TGTGCCAGCAGTGAAGGGGCGGGAAGCACAGATACGCAGTATTTT	1	Blood	10670	FALSE	FALSE	FALSE
TACCTTAGTTACCGAT-1-P190604_Blood_1	clone_P190604:9899:2	P190604	P190604_TRAV17_TGTGCTACGGAATCTAACTTTGGAAATGAGAAATTAACCTTT_TRAJ48:P190604_TRBV15_TGTGCCACCAGCAAACTAGCGGGAGAGGAGCAGTACTTC_TRBJ2-7	TRAC	TRAV17	TRAJ48	TGTGCTACGGAATCTAACTTTGGAAATGAGAAATTAACCTTT	TRAC	TRBV15	TRBJ2-7	TGTGCCACCAGCAAACTAGCGGGAGAGGAGCAGTACTTC	2	Blood	9899	TRUE	FALSE	FALSE
TACGGATGTCCTAGCG-1-P190604_Blood_1	clone_P190604:10090:1	P190604	P190604_TRAV20_TGTGCTGTGCAGGGGGGTGGCCAGAAGCTGCTCTTT_TRAJ16:P190604_TRBV7-9_TGTGCCAGCAGCTTAGCAATCGGAGATCAGCCCCAGCATTTT_TRBJ1-5	TRAC	TRAV20	TRAJ16	TGTGCTGTGCAGGGGGGTGGCCAGAAGCTGCTCTTT	TRAC	TRBV7-9	TRBJ1-5	TGTGCCAGCAGCTTAGCAATCGGAGATCAGCCCCAGCATTTT	1	Blood	10090	FALSE	FALSE	FALSE
TACGGTAAGATCTGCT-1-P190604_Blood_1	clone_P190604:9969:1	P190604	P190604_TRAV19_TGTGCTCTGAGAGATAATGCAGGCAACATGCTCACCTTT_TRAJ39:P190604_TRBV28_TGTGCCAGCAGCCCCCCGCGGACGGAGCCAACGTACTATGGCTACACCTTC_TRBJ1-2	TRAC	TRAV19	TRAJ39	TGTGCTCTGAGAGATAATGCAGGCAACATGCTCACCTTT	TRAC	TRBV28	TRBJ1-2	TGTGCCAGCAGCCCCCCGCGGACGGAGCCAACGTACTATGGCTACACCTTC	1	Blood	9969	FALSE	FALSE	FALSE
TACGGTAGTCTGGTCG-1-P190604_Blood_1	clone_P190604:10689:1	P190604	P190604_TRAV4_TGCCTCGTGGGTGCTCCTTATAATGCAGGCAACATGCTCACCTTT_TRAJ39:P190604_TRBV6-5_TGTGCCAGCAGTTACAAGGGGACCAACACTGAAGCTTTCTTT_TRBJ1-1	TRAC	TRAV4	TRAJ39	TGCCTCGTGGGTGCTCCTTATAATGCAGGCAACATGCTCACCTTT	TRAC	TRBV6-5	TRBJ1-1	TGTGCCAGCAGTTACAAGGGGACCAACACTGAAGCTTTCTTT	1	Blood	10689	FALSE	FALSE	FALSE
TACTCATGTAAGGATT-1-P190604_Blood_1	clone_P190604:9709:1	P190604	P190604_TRAV13-1_TGTGCAGCAAGTAACGACTACAAGCTCAGCTTT_TRAJ20:P190604_TRBV19_TGTGCCAGTAGTATAGTCAAGACAGGGGGTAATGAAAAACTGTTTTTT_TRBJ1-4	TRAC	TRAV13-1	TRAJ20	TGTGCAGCAAGTAACGACTACAAGCTCAGCTTT	TRAC	TRBV19	TRBJ1-4	TGTGCCAGTAGTATAGTCAAGACAGGGGGTAATGAAAAACTGTTTTTT	1	Blood	9709	FALSE	FALSE	FALSE
TACTTGTGTCAGAAGC-1-P190604_Blood_1	clone_P190604:10236:2	P190604	P190604_TRAV23/DV6_TGTGCAGCGGGGTGTTCCGGCCAGGCAGGAACTGCTCTGATCTTT_TRAJ15:P190604_TRBV10-2_TGCGCCAGCAGCGGGGTTTTCCGCGGGGAAGCTTTCTTT_TRBJ1-1	TRAC	TRAV23/DV6	TRAJ15	TGTGCAGCGGGGTGTTCCGGCCAGGCAGGAACTGCTCTGATCTTT	TRAC	TRBV10-2	TRBJ1-1	TGCGCCAGCAGCGGGGTTTTCCGCGGGGAAGCTTTCTTT	2	Blood	10236	TRUE	FALSE	FALSE
TAGACCAAGCTGCGAA-1-P190604_Blood_1	clone_P190604:9647:1	P190604	P190604_TRAV12-2_TGTGCCGTTTACAGCAGTGCTTCCAAGATAATCTTT_TRAJ3:P190604_TRBV9_TGTGCCAGCAGCCCCGGGACAGGGATAGATGGCTACACCTTC_TRBJ1-2	TRAC	TRAV12-2	TRAJ3	TGTGCCGTTTACAGCAGTGCTTCCAAGATAATCTTT	TRAC	TRBV9	TRBJ1-2	TGTGCCAGCAGCCCCGGGACAGGGATAGATGGCTACACCTTC	1	Blood	9647	FALSE	FALSE	FALSE
TAGAGCTCAGTCACTA-1-P190604_Blood_1	clone_P190604:10944:1	P190604	P190604_TRAV8-6_TGTGCTGTGAGTAACGACTACAAGCTCAGCTTT_TRAJ20:P190604_TRBV5-8_TGTGCCAGCAGCTGGGGGACAGGCTCAACCTACGAGCAGTACTTC_TRBJ2-7	TRAC	TRAV8-6	TRAJ20	TGTGCTGTGAGTAACGACTACAAGCTCAGCTTT	TRAC	TRBV5-8	TRBJ2-7	TGTGCCAGCAGCTGGGGGACAGGCTCAACCTACGAGCAGTACTTC	1	Blood	10944	FALSE	FALSE	FALSE
TAGAGCTGTGCTTCTC-1-P190604_Blood_1	clone_P190604:10726:1	P190604	P190604_TRAV5_TGTGCAGACGGTGGGGGTTACCAGAAAGTTACCTTT_TRAJ13:P190604_TRBV2_TGTGCCAGCAGTGATGGACAGGGGAAAAACATTCAGTACTTC_TRBJ2-4	TRAC	TRAV5	TRAJ13	TGTGCAGACGGTGGGGGTTACCAGAAAGTTACCTTT	TRAC	TRBV2	TRBJ2-4	TGTGCCAGCAGTGATGGACAGGGGAAAAACATTCAGTACTTC	1	Blood	10726	FALSE	FALSE	FALSE
TAGAGCTTCCCAAGTA-1-P190604_Blood_1	clone_P190604:11007:1	P190604	P190604_TRAV9-2_TGTGCTCTGAGTGAGGATTCAGGAGGAGGTGCTGACGGACTCACCTTT_TRAJ45:P190604_TRBV7-7_TGTGCTAGCAGCTTTTCGGCGGGAGGGTCCTACGAGCAGTACTTC_TRBJ2-7	TRAC	TRAV9-2	TRAJ45	TGTGCTCTGAGTGAGGATTCAGGAGGAGGTGCTGACGGACTCACCTTT	TRAC	TRBV7-7	TRBJ2-7	TGTGCTAGCAGCTTTTCGGCGGGAGGGTCCTACGAGCAGTACTTC	1	Blood	11007	FALSE	FALSE	FALSE
TAGCCGGCAAGCTGGA-1-P190604_Blood_1	clone_P190604:9995:1	P190604	P190604_TRAV19_TGTGCTCTGAGTGAGGCAGCAAGAGATGACAAGATCATCTTT_TRAJ30:P190604_TRBV5-6_TGTGCCAGCAGCTCGGGACAGGGGGTTAATGAGCAGTTCTTC_TRBJ2-1	TRAC	TRAV19	TRAJ30	TGTGCTCTGAGTGAGGCAGCAAGAGATGACAAGATCATCTTT	TRAC	TRBV5-6	TRBJ2-1	TGTGCCAGCAGCTCGGGACAGGGGGTTAATGAGCAGTTCTTC	1	Blood	9995	FALSE	FALSE	FALSE
TAGCCGGCAGGTTTCA-1-P190604_Blood_1	clone_P190604:11009:1	P190604	P190604_TRAV9-2_TGTGCTCTGAGTGATAGATCTAACTTTGGAAATGAGAAATTAACCTTT_TRAJ48:P190604_TRBV9_TGTGCCAGCAGCGCCGGACAGGGTTCTAATCAGCCCCAGCATTTT_TRBJ1-5	TRAC	TRAV9-2	TRAJ48	TGTGCTCTGAGTGATAGATCTAACTTTGGAAATGAGAAATTAACCTTT	TRAC	TRBV9	TRBJ1-5	TGTGCCAGCAGCGCCGGACAGGGTTCTAATCAGCCCCAGCATTTT	1	Blood	11009	FALSE	FALSE	FALSE
TAGTGGTAGGAGTCTG-1-P190604_Blood_1	clone_P190604:10013:1	P190604	P190604_TRAV19_TGTGCTCTGAGTGAGGTCGACCTGGATAGCAGCTATAAATTGATCTTC_TRAJ12:P190604_TRBV5-1_TGCGCCAGCAGCTTGGTCCACCAACCGCCGAACACTGAAGCTTTCTTT_TRBJ1-1	TRAC	TRAV19	TRAJ12	TGTGCTCTGAGTGAGGTCGACCTGGATAGCAGCTATAAATTGATCTTC	TRAC	TRBV5-1	TRBJ1-1	TGCGCCAGCAGCTTGGTCCACCAACCGCCGAACACTGAAGCTTTCTTT	1	Blood	10013	FALSE	FALSE	FALSE
TAGTGGTTCATTCACT-1-P190604_Blood_1	clone_P190604:10136:1	P190604	P190604_TRAV21_TGTGCTGTGAATTCAGGAAACACACCTCTTGTCTTT_TRAJ29:P190604_TRBV28_TGTGCCAGCAGCTTCACCGGGACACGGAATGAGCAGTTCTTC_TRBJ2-1	TRAC	TRAV21	TRAJ29	TGTGCTGTGAATTCAGGAAACACACCTCTTGTCTTT	TRAC	TRBV28	TRBJ2-1	TGTGCCAGCAGCTTCACCGGGACACGGAATGAGCAGTTCTTC	1	Blood	10136	FALSE	FALSE	FALSE
TAGTGGTTCGCACTCT-1-P190604_Blood_1	clone_P190604:9528:3	P190604	P190604_TRAV12-1_TGTGTGGTGAACATGGGGGCTGGTGGTACTAGCTATGGAAAGCTGACATTT_TRAJ52:P190604_TRBV15_TGTGCCACCAGCAGAGACTGGGGACCCCCGGACTTC_TRBJ2-4	TRAC	TRAV12-1	TRAJ52	TGTGTGGTGAACATGGGGGCTGGTGGTACTAGCTATGGAAAGCTGACATTT	TRAC	TRBV15	TRBJ2-4	TGTGCCACCAGCAGAGACTGGGGACCCCCGGACTTC	3	Blood	9528	TRUE	FALSE	FALSE
TATCAGGCAGTAAGAT-1-P190604_Blood_1	clone_P190604:9695:1	P190604	P190604_TRAV13-1_TGTGCAGCAAACGGGGGTTACCAGAAAGTTACCTTT_TRAJ13:P190604_TRBV5-4_TGTGCCAGCAGCTCCACGGACCGATACGAGCAGTACTTC_TRBJ2-7	TRAC	TRAV13-1	TRAJ13	TGTGCAGCAAACGGGGGTTACCAGAAAGTTACCTTT	TRAC	TRBV5-4	TRBJ2-7	TGTGCCAGCAGCTCCACGGACCGATACGAGCAGTACTTC	1	Blood	9695	FALSE	FALSE	FALSE
TATCTCAAGCGCCTCA-1-P190604_Blood_1	clone_P190604:10725:1	P190604	P190604_TRAV5_TGTGCAGACAATACCGGCACTGCCAGTAAACTCACCTTT_TRAJ44:P190604_TRBV7-9_TGTGCCAGCAGCTTTGACGCACTGGGGAACACAGATACGCAGTATTTT_TRBJ2-3	TRAC	TRAV5	TRAJ44	TGTGCAGACAATACCGGCACTGCCAGTAAACTCACCTTT	TRAC	TRBV7-9	TRBJ2-3	TGTGCCAGCAGCTTTGACGCACTGGGGAACACAGATACGCAGTATTTT	1	Blood	10725	FALSE	FALSE	FALSE
TATGCCCAGTTAACGA-1-P190604_Blood_1	clone_P190604:10926:1	P190604	P190604_TRAV8-4_TGTGCTGTGAGTGGGGACTTTGGAAATGAGAAATTAACCTTT_TRAJ48:P190604_TRBV19_TGTGCCAGTAGTATCGGCACGGCACTCTATGGCTACACCTTC_TRBJ1-2	TRAC	TRAV8-4	TRAJ48	TGTGCTGTGAGTGGGGACTTTGGAAATGAGAAATTAACCTTT	TRAC	TRBV19	TRBJ1-2	TGTGCCAGTAGTATCGGCACGGCACTCTATGGCTACACCTTC	1	Blood	10926	FALSE	FALSE	FALSE
TATGCCCGTGAGTATA-1-P190604_Blood_1	clone_P190604:9873:1	P190604	P190604_TRAV16_TGTGCTCTAACCTATGGCTCTAGCAACACAGGCAAACTAATCTTT_TRAJ37:P190604_TRBV18_TGTGCCAGCTCACCATCAGGTAGGAATCAGCCCCAGCATTTT_TRBJ1-5	TRAC	TRAV16	TRAJ37	TGTGCTCTAACCTATGGCTCTAGCAACACAGGCAAACTAATCTTT	TRAC	TRBV18	TRBJ1-5	TGTGCCAGCTCACCATCAGGTAGGAATCAGCCCCAGCATTTT	1	Blood	9873	FALSE	FALSE	FALSE
TATTACCCACAGTCGC-1-P190604_Blood_1	clone_P190604:10665:6	P190604	P190604_TRAV4_TGCCTCGTGCGGAGCTCTACCGGCACTGCCAGTAAACTCACCTTT_TRAJ44:P190604_TRBV7-3_TGTGCCAGCAGCTTAATAGCGGGAGGGATCACAGATACGCAGTATTTT_TRBJ2-3	TRAC	TRAV4	TRAJ44	TGCCTCGTGCGGAGCTCTACCGGCACTGCCAGTAAACTCACCTTT	TRAC	TRBV7-3	TRBJ2-3	TGTGCCAGCAGCTTAATAGCGGGAGGGATCACAGATACGCAGTATTTT	6	Blood	10665	TRUE	FALSE	FALSE
TCACGAATCAACGGGA-1-P190604_Blood_1	clone_P190604:10791:1	P190604	P190604_TRAV8-1_TGTGCCGTGAGTTATAACCAGGGAGGAAAGCTTATCTTC_TRAJ23:P190604_TRBV11-1_TGTGCCAGCAGCTTGGCAGGGCAGGTCATCCAAGAGACCCAGTACTTC_TRBJ2-5	TRAC	TRAV8-1	TRAJ23	TGTGCCGTGAGTTATAACCAGGGAGGAAAGCTTATCTTC	TRAC	TRBV11-1	TRBJ2-5	TGTGCCAGCAGCTTGGCAGGGCAGGTCATCCAAGAGACCCAGTACTTC	1	Blood	10791	FALSE	FALSE	FALSE
TCACGAATCGTTACGA-1-P190604_Blood_1	clone_P190604:10567:6	P190604	P190604_TRAV34_TGTGGAGCTTCTACCTCAGGAACCTACAAATACATCTTT_TRAJ40:P190604_TRBV7-8_TGTGCCAGCAGTCTTTCCCGGGGTAATGGCTATGGCTACACCTTC_TRBJ1-2	TRAC	TRAV34	TRAJ40	TGTGGAGCTTCTACCTCAGGAACCTACAAATACATCTTT	TRAC	TRBV7-8	TRBJ1-2	TGTGCCAGCAGTCTTTCCCGGGGTAATGGCTATGGCTACACCTTC	6	Blood	10567	TRUE	FALSE	FALSE
TCAGATGCAGATTGCT-1-P190604_Blood_1	clone_P190604:10070:1	P190604	P190604_TRAV20_TGTGCTGTCCGAACTCAGGGCGGATCTGAAAAGCTGGTCTTT_TRAJ57:P190604_TRBV20-1_TGCAGTGCTAGGCCCGGGACAGTGCTCGACGAGCAGTACTTC_TRBJ2-7	TRAC	TRAV20	TRAJ57	TGTGCTGTCCGAACTCAGGGCGGATCTGAAAAGCTGGTCTTT	TRAC	TRBV20-1	TRBJ2-7	TGCAGTGCTAGGCCCGGGACAGTGCTCGACGAGCAGTACTTC	1	Blood	10070	FALSE	FALSE	FALSE
TCAGCAAGTGGTACAG-1-P190604_Blood_1	clone_P190604:10527:1	P190604	P190604_TRAV3_TGTGCTGTGAGAGATCAGATGGATAGCAGCTATAAATTGATCTTC_TRAJ12:P190604_TRBV5-4_TGTGCCAGCAGCTTGGAGGTGGGAGAGCAGTACTTC_TRBJ2-7	TRAC	TRAV3	TRAJ12	TGTGCTGTGAGAGATCAGATGGATAGCAGCTATAAATTGATCTTC	TRAC	TRBV5-4	TRBJ2-7	TGTGCCAGCAGCTTGGAGGTGGGAGAGCAGTACTTC	1	Blood	10527	FALSE	FALSE	FALSE
TCAGCAATCGCATGAT-1-P190604_Blood_1	clone_P190604:10504:1	P190604	P190604_TRAV3_TGTGCTGTGAGAGACATTAACAATAACAATGACATGCGCTTT_TRAJ43:P190604_TRBV20-1_TGCAGTGTGGGACAGAGCCGATTCACTGAAGCTTTCTTT_TRBJ1-1	TRAC	TRAV3	TRAJ43	TGTGCTGTGAGAGACATTAACAATAACAATGACATGCGCTTT	TRAC	TRBV20-1	TRBJ1-1	TGCAGTGTGGGACAGAGCCGATTCACTGAAGCTTTCTTT	1	Blood	10504	FALSE	FALSE	FALSE
TCAGCTCTCCTTCAAT-1-P190604_Blood_1	clone_P190604:10331:1	P190604	P190604_TRAV26-1_TGCATCGTCCCCCAGGGGGGAGGTGGGGATAGCAACTATCAGTTAATCTGG_TRAJ33:P190604_TRBV7-9_TGTGCCAGCAGCTTAACAGGTCTGAACTATGGCTACACCTTC_TRBJ1-2	TRAC	TRAV26-1	TRAJ33	TGCATCGTCCCCCAGGGGGGAGGTGGGGATAGCAACTATCAGTTAATCTGG	TRAC	TRBV7-9	TRBJ1-2	TGTGCCAGCAGCTTAACAGGTCTGAACTATGGCTACACCTTC	1	Blood	10331	FALSE	FALSE	FALSE
TCAGGTAAGCGCCTTG-1-P190604_Blood_1	clone_P190604:9935:1	P190604	P190604_TRAV17_TGTGCTACGGATAGTGGAGGTAGCAACTATAAACTGACATTT_TRAJ53:P190604_TRBV6-2_TGTGCCAGCACTCGGGTTGTGAGGGGGCAAGAGACCCAGTACTTC_TRBJ2-5	TRAC	TRAV17	TRAJ53	TGTGCTACGGATAGTGGAGGTAGCAACTATAAACTGACATTT	TRAC	TRBV6-2	TRBJ2-5	TGTGCCAGCACTCGGGTTGTGAGGGGGCAAGAGACCCAGTACTTC	1	Blood	9935	FALSE	FALSE	FALSE
TCCCGATGTGTAACGG-1-P190604_Blood_1	clone_P190604:10472:1	P190604	P190604_TRAV29/DV5_TGTGCAGCTCCCGGAGGAGGTGCTGACGGACTCACCTTT_TRAJ45:P190604_TRBV20-1_TGCAGTGCCTCGGGACTAGCCCTATACAATGAGCAGTTCTTC_TRBJ2-1	TRAC	TRAV29/DV5	TRAJ45	TGTGCAGCTCCCGGAGGAGGTGCTGACGGACTCACCTTT	TRAC	TRBV20-1	TRBJ2-1	TGCAGTGCCTCGGGACTAGCCCTATACAATGAGCAGTTCTTC	1	Blood	10472	FALSE	FALSE	FALSE
TCGAGGCGTAACGTTC-1-P190604_Blood_1	clone_P190604:10228:1	P190604	P190604_TRAV23/DV6_TGTGCAGCAGCCGCGCCTGGGGGTTACCAGAAAGTTACCTTT_TRAJ13:P190604_TRBV20-1_TGCAGTGCCGAGGGACAGGGTATAGAGACCCAGTACTTC_TRBJ2-5	TRAC	TRAV23/DV6	TRAJ13	TGTGCAGCAGCCGCGCCTGGGGGTTACCAGAAAGTTACCTTT	TRAC	TRBV20-1	TRBJ2-5	TGCAGTGCCGAGGGACAGGGTATAGAGACCCAGTACTTC	1	Blood	10228	FALSE	FALSE	FALSE
TCGCGAGAGGCTACGA-1-P190604_Blood_1	clone_P190604:10767:1	P190604	P190604_TRAV6_TGTGCTCTAGAGGCGGGCAGGAGAGCACTTACTTTT_TRAJ5:P190604_TRBV6-2_TGTGCCAGCAGTTGGGACAGGACAGATACGCAGTATTTT_TRBJ2-3	TRAC	TRAV6	TRAJ5	TGTGCTCTAGAGGCGGGCAGGAGAGCACTTACTTTT	TRAC	TRBV6-2	TRBJ2-3	TGTGCCAGCAGTTGGGACAGGACAGATACGCAGTATTTT	1	Blood	10767	FALSE	FALSE	FALSE
TCGCGAGAGTTGTCGT-1-P190604_Blood_1	clone_P190604:9499:3	P190604	P190604_TRAV12-1_TGTGCGAGGCGGTACTCTGGGGCTGGGAGTTACCAACTCACTTTC_TRAJ28:P190604_TRBV12-3_TGTGCCAGCAGTCGGGGAACTGGCTACACCTTC_TRBJ1-2	TRAC	TRAV12-1	TRAJ28	TGTGCGAGGCGGTACTCTGGGGCTGGGAGTTACCAACTCACTTTC	TRAC	TRBV12-3	TRBJ1-2	TGTGCCAGCAGTCGGGGAACTGGCTACACCTTC	3	Blood	9499	TRUE	FALSE	FALSE
TCGCGTTCACTTACGA-1-P190604_Blood_1	clone_P190604:10201:1	P190604	P190604_TRAV22_TGTGCTGTTCGATCCAGCAACCGTAAGCTGATTTGG_TRAJ38:P190604_TRBV9_TGTGCCAGCAGCGCCGAACCCGGGACAGCAGATACGCAGTATTTT_TRBJ2-3	TRAC	TRAV22	TRAJ38	TGTGCTGTTCGATCCAGCAACCGTAAGCTGATTTGG	TRAC	TRBV9	TRBJ2-3	TGTGCCAGCAGCGCCGAACCCGGGACAGCAGATACGCAGTATTTT	1	Blood	10201	FALSE	FALSE	FALSE
TCGCGTTGTCTAAACC-1-P190604_Blood_1	clone_P190604:9540:1	P190604	P190604_TRAV12-1_TGTGTGGTGAACTTGAGTGACGGAAAGCTTATCTTC_TRAJ23:P190604_TRBV7-2_TGTGCCAGCAGCTTAGTAGGGAGAGGGGAGACCCAGTACTTC_TRBJ2-5	TRAC	TRAV12-1	TRAJ23	TGTGTGGTGAACTTGAGTGACGGAAAGCTTATCTTC	TRAC	TRBV7-2	TRBJ2-5	TGTGCCAGCAGCTTAGTAGGGAGAGGGGAGACCCAGTACTTC	1	Blood	9540	FALSE	FALSE	FALSE
TCGCGTTGTTCCACGG-1-P190604_Blood_1	clone_P190604:9516:1	P190604	P190604_TRAV12-1_TGTGTGGTGAACACCGGTAACCAGTTCTATTTT_TRAJ49:P190604_TRBV6-1_TGTGCCAGCCCCTGCGTGGGAGCGGGAGTAAATGTTGGCGGGGAGCTGTTTTTT_TRBJ2-2	TRAC	TRAV12-1	TRAJ49	TGTGTGGTGAACACCGGTAACCAGTTCTATTTT	TRAC	TRBV6-1	TRBJ2-2	TGTGCCAGCCCCTGCGTGGGAGCGGGAGTAAATGTTGGCGGGGAGCTGTTTTTT	1	Blood	9516	FALSE	FALSE	FALSE
TCGGTAACAGTATGCT-1-P190604_Blood_1	clone_P190604:9875:1	P190604	P190604_TRAV16_TGTGCTCTAAGTGAAATCACTGGAGCCAATAGTAAGCTGACATTT_TRAJ56:P190604_TRBV20-1_TGCAGTGCTAGATTTGGGACCTCTTACGGGGCTTTCTTT_TRBJ1-1	TRAC	TRAV16	TRAJ56	TGTGCTCTAAGTGAAATCACTGGAGCCAATAGTAAGCTGACATTT	TRAC	TRBV20-1	TRBJ1-1	TGCAGTGCTAGATTTGGGACCTCTTACGGGGCTTTCTTT	1	Blood	9875	FALSE	FALSE	FALSE
TCGGTAATCATATCGG-1-P190604_Blood_1	clone_P190604:10783:1	P190604	P190604_TRAV8-1_TGTGCCGTGAATGCGGTGGGTGACATGCGCTTT_TRAJ43:P190604_TRBV19_TGTGCCAGTAGTCCCCCGGGGGGGGCAAGGAGTGAGCAGTTCTTC_TRBJ2-1	TRAC	TRAV8-1	TRAJ43	TGTGCCGTGAATGCGGTGGGTGACATGCGCTTT	TRAC	TRBV19	TRBJ2-1	TGTGCCAGTAGTCCCCCGGGGGGGGCAAGGAGTGAGCAGTTCTTC	1	Blood	10783	FALSE	FALSE	FALSE
TCGTACCCACCGAAAG-1-P190604_Blood_1	clone_P190604:10582:1	P190604	P190604_TRAV35_TGTGCTGGGCAGCTTCACTCCGGCGACTTGAATTATGGAGGAAGCCAAGGAAATCTCATCTTT_TRAJ42:P190604_TRBV6-2_TGTGCCAGCAGCCCATACAGGGACTATGAGCAGTTCTTC_TRBJ2-1	TRAC	TRAV35	TRAJ42	TGTGCTGGGCAGCTTCACTCCGGCGACTTGAATTATGGAGGAAGCCAAGGAAATCTCATCTTT	TRAC	TRBV6-2	TRBJ2-1	TGTGCCAGCAGCCCATACAGGGACTATGAGCAGTTCTTC	1	Blood	10582	FALSE	FALSE	FALSE
TCGTAGACATGACATC-1-P190604_Blood_1	clone_P190604:9510:1	P190604	P190604_TRAV12-1_TGTGTGGTGAAACGAACAGGAGGAAGCTACATACCTACATTT_TRAJ6:P190604_TRBV5-5_TGTGCCAGCAGCTTGAGCATGACAGGCGGTTCTAACTATGGCTACACCTTC_TRBJ1-2	TRAC	TRAV12-1	TRAJ6	TGTGTGGTGAAACGAACAGGAGGAAGCTACATACCTACATTT	TRAC	TRBV5-5	TRBJ1-2	TGTGCCAGCAGCTTGAGCATGACAGGCGGTTCTAACTATGGCTACACCTTC	1	Blood	9510	FALSE	FALSE	FALSE
TCGTAGAGTATATGGA-1-P190604_Blood_1	clone_P190604:10088:1	P190604	P190604_TRAV20_TGTGCTGTGCAGGGCGACTGGGATGACAAGATCATCTTT_TRAJ30:P190604_TRBV7-9_TGTGCCAGCAGCTTTCCACAGAGCACAGATACGCAGTATTTT_TRBJ2-3	TRAC	TRAV20	TRAJ30	TGTGCTGTGCAGGGCGACTGGGATGACAAGATCATCTTT	TRAC	TRBV7-9	TRBJ2-3	TGTGCCAGCAGCTTTCCACAGAGCACAGATACGCAGTATTTT	1	Blood	10088	FALSE	FALSE	FALSE
TCTATTGAGTCCGGTC-1-P190604_Blood_1	clone_P190604:10524:1	P190604	P190604_TRAV3_TGTGCTGTGAGAGAGGGGAGCAACACAGGCAAACTAATCTTT_TRAJ37:P190604_TRBV10-1_TGCGCCAGCAGTGGAACCGGGACAGGGAAGAACGAGCAGTACTTC_TRBJ2-7	TRAC	TRAV3	TRAJ37	TGTGCTGTGAGAGAGGGGAGCAACACAGGCAAACTAATCTTT	TRAC	TRBV10-1	TRBJ2-7	TGCGCCAGCAGTGGAACCGGGACAGGGAAGAACGAGCAGTACTTC	1	Blood	10524	FALSE	FALSE	FALSE
TCTATTGTCAGCATGT-1-P190604_Blood_1	clone_P190604:10233:1	P190604	P190604_TRAV23/DV6_TGTGCAGCCTCCCGTTCTGCAAGGCAACTGACCTTT_TRAJ22:P190604_TRBV18_TGTGCCAGCTCATCGGACGGAAATCAGCCCCAGCATTTT_TRBJ1-5	TRAC	TRAV23/DV6	TRAJ22	TGTGCAGCCTCCCGTTCTGCAAGGCAACTGACCTTT	TRAC	TRBV18	TRBJ1-5	TGTGCCAGCTCATCGGACGGAAATCAGCCCCAGCATTTT	1	Blood	10233	FALSE	FALSE	FALSE
TCTCTAACAATCTGCA-1-P190604_Blood_1	clone_P190604:9566:1	P190604	P190604_TRAV12-2_TGTGCCCCGGGGGGAGGAGGTGCTGACGGACTCACCTTT_TRAJ45:P190604_TRBV20-1_TGCAGTGCTAGATGGAGCCTAAGCACAGATACGCAGTATTTT_TRBJ2-3	TRAC	TRAV12-2	TRAJ45	TGTGCCCCGGGGGGAGGAGGTGCTGACGGACTCACCTTT	TRAC	TRBV20-1	TRBJ2-3	TGCAGTGCTAGATGGAGCCTAAGCACAGATACGCAGTATTTT	1	Blood	9566	FALSE	FALSE	FALSE
TCTGAGAAGGCCCTTG-1-P190604_Blood_1	clone_P190604:9642:1	P190604	P190604_TRAV12-2_TGTGCCGTGTACAGCAGTGCTTCCAAGATAATCTTT_TRAJ3:P190604_TRBV15_TGTGCCACCAGCAGAGATAAGGCTCGAGCGGCTAGCACAGATACGCAGTATTTT_TRBJ2-3	TRAC	TRAV12-2	TRAJ3	TGTGCCGTGTACAGCAGTGCTTCCAAGATAATCTTT	TRAC	TRBV15	TRBJ2-3	TGTGCCACCAGCAGAGATAAGGCTCGAGCGGCTAGCACAGATACGCAGTATTTT	1	Blood	9642	FALSE	FALSE	FALSE
TCTGAGAGTGACCAAG-1-P190604_Blood_1	clone_P190604:10363:1	P190604	P190604_TRAV27_TGTGCAGGACGAGGCAGCTGGGGGAAATTGCAGTTT_TRAJ24:P190604_TRBV29-1_TGCAGCGCCGAAGGCCCGGGGGCTAGCGGTGGGTTCTTC_TRBJ2-1	TRAC	TRAV27	TRAJ24	TGTGCAGGACGAGGCAGCTGGGGGAAATTGCAGTTT	TRAC	TRBV29-1	TRBJ2-1	TGCAGCGCCGAAGGCCCGGGGGCTAGCGGTGGGTTCTTC	1	Blood	10363	FALSE	FALSE	FALSE
TCTTCGGAGTATCGAA-1-P190604_Blood_1	clone_P190604:10002:1	P190604	P190604_TRAV19_TGTGCTCTGAGTGAGGCGGCGAGTTACCAGAAAGTTACCTTT_TRAJ13:P190604_TRBV7-7_TGTGCTAGCAGCTTGACAGGGGGAGCCACCGGGGAGCTGTTTTTT_TRBJ2-2	TRAC	TRAV19	TRAJ13	TGTGCTCTGAGTGAGGCGGCGAGTTACCAGAAAGTTACCTTT	TRAC	TRBV7-7	TRBJ2-2	TGTGCTAGCAGCTTGACAGGGGGAGCCACCGGGGAGCTGTTTTTT	1	Blood	10002	FALSE	FALSE	FALSE
TCTTTCCCATTGGCGC-1-P190604_Blood_1	clone_P190604:10439:1	P190604	P190604_TRAV29/DV5_TGTGCAGCAAGCGCGGGGTCAGCATACTCTGGGGCTGGGAGTTACCAACTCACTTTC_TRAJ28:P190604_TRBV11-2_TGTGCCGGATCCATCGGGCTAGCGGGATCCGGTGAGCAGTTCTTC_TRBJ2-1	TRAC	TRAV29/DV5	TRAJ28	TGTGCAGCAAGCGCGGGGTCAGCATACTCTGGGGCTGGGAGTTACCAACTCACTTTC	TRAC	TRBV11-2	TRBJ2-1	TGTGCCGGATCCATCGGGCTAGCGGGATCCGGTGAGCAGTTCTTC	1	Blood	10439	FALSE	FALSE	FALSE
TGAAAGAAGTGGGATC-1-P190604_Blood_1	clone_P190604:10134:1	P190604	P190604_TRAV21_TGTGCTGTGAATAGGGCTGGGAGTTACCAACTCACTTTC_TRAJ28:P190604_TRBV3-1_TGTGCCAGCAGCCAAGATGAGGTCGGGTGGGGTTGGGATACGCAGTATTTT_TRBJ2-3	TRAC	TRAV21	TRAJ28	TGTGCTGTGAATAGGGCTGGGAGTTACCAACTCACTTTC	TRAC	TRBV3-1	TRBJ2-3	TGTGCCAGCAGCCAAGATGAGGTCGGGTGGGGTTGGGATACGCAGTATTTT	1	Blood	10134	FALSE	FALSE	FALSE
TGAAAGACACGAAGCA-1-P190604_Blood_1	clone_P190604:9410:1	P190604	P190604_TRAV1-2_TGTGCTGTGAGAGCCGCAGGCTTTCAGAAACTTGTATTT_TRAJ8:P190604_TRBV7-3_TGTGCCAGCATTCAGACGTGGAGCGGGGACCGCTCGTACAATGAGCAGTTCTTC_TRBJ2-1	TRAC	TRAV1-2	TRAJ8	TGTGCTGTGAGAGCCGCAGGCTTTCAGAAACTTGTATTT	TRAC	TRBV7-3	TRBJ2-1	TGTGCCAGCATTCAGACGTGGAGCGGGGACCGCTCGTACAATGAGCAGTTCTTC	1	Blood	9410	FALSE	FALSE	FALSE
TGACGGCGTCTCTCTG-1-P190604_Blood_1	clone_P190604:10446:1	P190604	P190604_TRAV29/DV5_TGTGCAGCAAGCGGGGGGAACAATGACATGCGCTTT_TRAJ43:P190604_TRBV5-1_TGCGCCAGCAGCCCTGCCGGGACAGGGCTCGCAGATACGCAGTATTTT_TRBJ2-3	TRAC	TRAV29/DV5	TRAJ43	TGTGCAGCAAGCGGGGGGAACAATGACATGCGCTTT	TRAC	TRBV5-1	TRBJ2-3	TGCGCCAGCAGCCCTGCCGGGACAGGGCTCGCAGATACGCAGTATTTT	1	Blood	10446	FALSE	FALSE	FALSE
TGACTAGCAAAGTGCG-1-P190604_Blood_1	clone_P190604:10427:4	P190604	P190604_TRAV29/DV5_TGTGCAGCAAGCGCGAGAACAGGAGGAGGTGCTGACGGACTCACCTTT_TRAJ45:P190604_TRBV9_TGTGCCAGCAGCGGGAGCGGGATTTTAGGCAATGAGCAGTTCTTC_TRBJ2-1	TRAC	TRAV29/DV5	TRAJ45	TGTGCAGCAAGCGCGAGAACAGGAGGAGGTGCTGACGGACTCACCTTT	TRAC	TRBV9	TRBJ2-1	TGTGCCAGCAGCGGGAGCGGGATTTTAGGCAATGAGCAGTTCTTC	4	Blood	10427	TRUE	FALSE	FALSE
TGACTTTTCCGCGTTT-1-P190604_Blood_1	clone_P190604:10869:1	P190604	P190604_TRAV8-3_TGTGCTGTGGGTTCCCGGAATAACAATGCCAGACTCATGTTT_TRAJ31:P190604_TRBV28_TGTGCCAGCAGTTTCGACAGGAGCTCCTACAATGAGCAGTTCTTC_TRBJ2-1	TRAC	TRAV8-3	TRAJ31	TGTGCTGTGGGTTCCCGGAATAACAATGCCAGACTCATGTTT	TRAC	TRBV28	TRBJ2-1	TGTGCCAGCAGTTTCGACAGGAGCTCCTACAATGAGCAGTTCTTC	1	Blood	10869	FALSE	FALSE	FALSE
TGAGAGGAGTTGTAGA-1-P190604_Blood_1	clone_P190604:10775:6	P190604	P190604_TRAV8-1_TGTGCCGTGAACCATTCTGGGGGTTACCAGAAAGTTACCTTT_TRAJ13:P190604_TRBV7-2_TGTGCCAGCAGCTCCGAAGCCAATCAGCCCCAGCATTTT_TRBJ1-5	TRAC	TRAV8-1	TRAJ13	TGTGCCGTGAACCATTCTGGGGGTTACCAGAAAGTTACCTTT	TRAC	TRBV7-2	TRBJ1-5	TGTGCCAGCAGCTCCGAAGCCAATCAGCCCCAGCATTTT	6	Blood	10775	TRUE	FALSE	FALSE
TGAGCCGGTGAAGGCT-1-P190604_Blood_1	clone_P190604:10286:7	P190604	P190604_TRAV25_TGTGCTGAGAACAGAGATGACAAGATCATCTTT_TRAJ30:P190604_TRBV3-1_TGTGCCAGCAGCCAAGAGGCATTGACAGGGGATAGAGGCTACACCTTC_TRBJ1-2	TRAC	TRAV25	TRAJ30	TGTGCTGAGAACAGAGATGACAAGATCATCTTT	TRAC	TRBV3-1	TRBJ1-2	TGTGCCAGCAGCCAAGAGGCATTGACAGGGGATAGAGGCTACACCTTC	7	Blood	10286	TRUE	FALSE	FALSE
TGAGGGAGTTTCGCTC-1-P190604_Blood_1	clone_P190604:9955:1	P190604	P190604_TRAV17_TGTGCTGGGAACACCGGTAACCAGTTCTATTTT_TRAJ49:P190604_TRBV10-3_TGTGCCATCAGTGGGACATTCGCTCAAGATAAGGAAAAACTGTTTTTT_TRBJ1-4	TRAC	TRAV17	TRAJ49	TGTGCTGGGAACACCGGTAACCAGTTCTATTTT	TRAC	TRBV10-3	TRBJ1-4	TGTGCCATCAGTGGGACATTCGCTCAAGATAAGGAAAAACTGTTTTTT	1	Blood	9955	FALSE	FALSE	FALSE
TGAGGGATCGCCTGTT-1-P190604_Blood_1	clone_P190604:9667:1	P190604	P190604_TRAV12-3_TGTGCAATGAGCGCCGGACCCGGTAACCAGTTCTATTTT_TRAJ49:P190604_TRBV7-3_TGTGCCAGCAGCTTAATGGCGGGAGTGGGCAATGAGCAGTTCTTC_TRBJ2-1	TRAC	TRAV12-3	TRAJ49	TGTGCAATGAGCGCCGGACCCGGTAACCAGTTCTATTTT	TRAC	TRBV7-3	TRBJ2-1	TGTGCCAGCAGCTTAATGGCGGGAGTGGGCAATGAGCAGTTCTTC	1	Blood	9667	FALSE	FALSE	FALSE
TGATTTCGTCTAGTGT-1-P190604_Blood_1	clone_P190604:10861:1	P190604	P190604_TRAV8-3_TGTGCTGTGGGTGCGTCGAACACCGGTAACCAGTTCTATTTT_TRAJ49:P190604_TRBV6-6_TGTGCCAGCAGTCGCACTAGCGGACCGATCTACGAGCAGTACTTC_TRBJ2-7	TRAC	TRAV8-3	TRAJ49	TGTGCTGTGGGTGCGTCGAACACCGGTAACCAGTTCTATTTT	TRAC	TRBV6-6	TRBJ2-7	TGTGCCAGCAGTCGCACTAGCGGACCGATCTACGAGCAGTACTTC	1	Blood	10861	FALSE	FALSE	FALSE
TGATTTCTCACCCGAG-1-P190604_Blood_1	clone_P190604:10253:1	P190604	P190604_TRAV24_TGTGCCTTTAATTCCTTAAGAGGAACCTACAAATACATCTTT_TRAJ40:P190604_TRBV7-3_TGTGCCAGCAGCCTCTTAGCGGGAGGGGGGAATGAGCAGTTCTTC_TRBJ2-1	TRAC	TRAV24	TRAJ40	TGTGCCTTTAATTCCTTAAGAGGAACCTACAAATACATCTTT	TRAC	TRBV7-3	TRBJ2-1	TGTGCCAGCAGCCTCTTAGCGGGAGGGGGGAATGAGCAGTTCTTC	1	Blood	10253	FALSE	FALSE	FALSE
TGATTTCTCGGTCTAA-1-P190604_Blood_1	clone_P190604:10421:60	P190604	P190604_TRAV29/DV5_TGTGCAGCAAGCGCCCATAGTGGAGGTAGCAACTATAAACTGACATTT_TRAJ53:P190604_TRBV7-9_TGTGCCACCAGATTAGGGTACGAGCAGTACTTC_TRBJ2-7	TRAC	TRAV29/DV5	TRAJ53	TGTGCAGCAAGCGCCCATAGTGGAGGTAGCAACTATAAACTGACATTT	TRAC	TRBV7-9	TRBJ2-7	TGTGCCACCAGATTAGGGTACGAGCAGTACTTC	60	Blood	10421	TRUE	FALSE	FALSE
TGCCAAAAGGCCATAG-1-P190604_Blood_1	clone_P190604:9851:1	P190604	P190604_TRAV14/DV4_TGTGCAATGAGAGGGCGCGTGAACACCGGTAACCAGTTCTATTTT_TRAJ49:P190604_TRBV6-2_TGTGCCAGCAGCCAAGGGACTCTCGAGCAGTACTTC_TRBJ2-7	TRAC	TRAV14/DV4	TRAJ49	TGTGCAATGAGAGGGCGCGTGAACACCGGTAACCAGTTCTATTTT	TRAC	TRBV6-2	TRBJ2-7	TGTGCCAGCAGCCAAGGGACTCTCGAGCAGTACTTC	1	Blood	9851	FALSE	FALSE	FALSE
TGCCAAAGTGCAGACA-1-P190604_Blood_1	clone_P190604:10115:29	P190604	P190604_TRAV21_TGTGCTGCGGGGATGGATAGCAACTATCAGTTAATCTGG_TRAJ33:P190604_TRBV27_TGTGCCAGCAGTCCTCGGACAGGGACCGGCGAGCAGTACTTC_TRBJ2-7	TRAC	TRAV21	TRAJ33	TGTGCTGCGGGGATGGATAGCAACTATCAGTTAATCTGG	TRAC	TRBV27	TRBJ2-7	TGTGCCAGCAGTCCTCGGACAGGGACCGGCGAGCAGTACTTC	29	Blood	10115	TRUE	FALSE	FALSE
TGCCCATAGAGCTGGT-1-P190604_Blood_1	clone_P190604:10529:1	P190604	P190604_TRAV3_TGTGCTGTGAGAGCCCTATCAGGAGGAAGCTACATACCTACATTT_TRAJ6:P190604_TRBV7-8_TGTGCCAGCAGCTTAGAAGGGCAGGGGGCGAGTGAGCAGTACTTC_TRBJ2-7	TRAC	TRAV3	TRAJ6	TGTGCTGTGAGAGCCCTATCAGGAGGAAGCTACATACCTACATTT	TRAC	TRBV7-8	TRBJ2-7	TGTGCCAGCAGCTTAGAAGGGCAGGGGGCGAGTGAGCAGTACTTC	1	Blood	10529	FALSE	FALSE	FALSE
TGCCCATGTATGAATG-1-P190604_Blood_1	clone_P190604:9530:1	P190604	P190604_TRAV12-1_TGTGTGGTGAACCCTTACAGCAGTGCTTCCAAGATAATCTTT_TRAJ3:P190604_TRBV19_TGTGCCAGTAGTAGACGCAGGGTTTTGAGGAGGAACACTGAAGCTTTCTTT_TRBJ1-1	TRAC	TRAV12-1	TRAJ3	TGTGTGGTGAACCCTTACAGCAGTGCTTCCAAGATAATCTTT	TRAC	TRBV19	TRBJ1-1	TGTGCCAGTAGTAGACGCAGGGTTTTGAGGAGGAACACTGAAGCTTTCTTT	1	Blood	9530	FALSE	FALSE	FALSE
TGCCCTAGTACCGTTA-1-P190604_Blood_1	clone_P190604:10103:1	P190604	P190604_TRAV20_TGTGCTGTGGGCCCAGGAACCTACAAATACATCTTT_TRAJ40:P190604_TRBV28_TGTGCCAGCAGTGGGGGAGTAGCAAACGAGCAGTACTTC_TRBJ2-7	TRAC	TRAV20	TRAJ40	TGTGCTGTGGGCCCAGGAACCTACAAATACATCTTT	TRAC	TRBV28	TRBJ2-7	TGTGCCAGCAGTGGGGGAGTAGCAAACGAGCAGTACTTC	1	Blood	10103	FALSE	FALSE	FALSE
TGCGCAGAGGAATTAC-1-P190604_Blood_1	clone_P190604:10051:1	P190604	P190604_TRAV2_TGTGCTGTGGAGGATCCGGTAACGGGCAGGAGAGCACTTACTTTT_TRAJ5:P190604_TRBV28_TGTGCCAGCAGCTCCGAAGGGACAGCGGGCACTGAAGCTTTCTTT_TRBJ1-1	TRAC	TRAV2	TRAJ5	TGTGCTGTGGAGGATCCGGTAACGGGCAGGAGAGCACTTACTTTT	TRAC	TRBV28	TRBJ1-1	TGTGCCAGCAGCTCCGAAGGGACAGCGGGCACTGAAGCTTTCTTT	1	Blood	10051	FALSE	FALSE	FALSE
TGCGGGTAGTCGATAA-1-P190604_Blood_1	clone_P190604:9733:1	P190604	P190604_TRAV13-1_TGTGCAGCAAGTCCGGAGAGAGGTAGCAACTATAAACTGACATTT_TRAJ53:P190604_TRBV5-6_TGTGCCAGCAGCTTTGGGGCAGGGAGGAGCTCCTACGAGCAGTACTTC_TRBJ2-7	TRAC	TRAV13-1	TRAJ53	TGTGCAGCAAGTCCGGAGAGAGGTAGCAACTATAAACTGACATTT	TRAC	TRBV5-6	TRBJ2-7	TGTGCCAGCAGCTTTGGGGCAGGGAGGAGCTCCTACGAGCAGTACTTC	1	Blood	9733	FALSE	FALSE	FALSE
TGCGTGGAGACATAAC-1-P190604_Blood_1	clone_P190604:10241:1	P190604	P190604_TRAV24_TGTGCCCCGGTGGGCGGTACTAGCTATGGAAAGCTGACATTT_TRAJ52:P190604_TRBV28_TGTGCCAGCAGTTTGGGGGGGAGAACTGGAAACACCATATATTTT_TRBJ1-3	TRAC	TRAV24	TRAJ52	TGTGCCCCGGTGGGCGGTACTAGCTATGGAAAGCTGACATTT	TRAC	TRBV28	TRBJ1-3	TGTGCCAGCAGTTTGGGGGGGAGAACTGGAAACACCATATATTTT	1	Blood	10241	FALSE	FALSE	FALSE
TGCGTGGTCAGGCCCA-1-P190604_Blood_1	clone_P190604:9809:1	P190604	P190604_TRAV13-2_TGTGCAGTTTCGATCTATGGTCAGAATTTTGTCTTT_TRAJ26:P190604_TRBV2_TGTGCCAGCAGTATCGGGACAGGGGGCGCGTATTATGGCTACACCTTC_TRBJ1-2	TRAC	TRAV13-2	TRAJ26	TGTGCAGTTTCGATCTATGGTCAGAATTTTGTCTTT	TRAC	TRBV2	TRBJ1-2	TGTGCCAGCAGTATCGGGACAGGGGGCGCGTATTATGGCTACACCTTC	1	Blood	9809	FALSE	FALSE	FALSE
TGCTGCTGTTGAGTTC-1-P190604_Blood_1	clone_P190604:10731:1	P190604	P190604_TRAV5_TGTGCAGAGAGCCCCCTGATTTATAACCAGGGAGGAAAGCTTATCTTC_TRAJ23:P190604_TRBV20-1_TGCAGTGCTAGAATTAGGGGGCTAGCGGGAATCTATGAGCAGTTCTTC_TRBJ2-1	TRAC	TRAV5	TRAJ23	TGTGCAGAGAGCCCCCTGATTTATAACCAGGGAGGAAAGCTTATCTTC	TRAC	TRBV20-1	TRBJ2-1	TGCAGTGCTAGAATTAGGGGGCTAGCGGGAATCTATGAGCAGTTCTTC	1	Blood	10731	FALSE	FALSE	FALSE
TGGACGCGTACCAGTT-1-P190604_Blood_1	clone_P190604:9945:1	P190604	P190604_TRAV17_TGTGCTACGGTCCCCCTACGAGCCAATAGTAAGCTGACATTT_TRAJ56:P190604_TRBV7-9_TGTGCCAGCACCCGGACAGGACAAGAGACCCAGTACTTC_TRBJ2-5	TRAC	TRAV17	TRAJ56	TGTGCTACGGTCCCCCTACGAGCCAATAGTAAGCTGACATTT	TRAC	TRBV7-9	TRBJ2-5	TGTGCCAGCACCCGGACAGGACAAGAGACCCAGTACTTC	1	Blood	9945	FALSE	FALSE	FALSE
TGGCCAGTCCCAACGG-1-P190604_Blood_1	clone_P190604:9438:3	P190604	P190604_TRAV1-2_TGTGCTGTGATGGATAGCAACTATCAGTTAATCTGG_TRAJ33:P190604_TRBV6-2_TGTGCCAGCAGTTACCAGCGGGAGGGCAATGAGCAGTTCTTC_TRBJ2-1	TRAC	TRAV1-2	TRAJ33	TGTGCTGTGATGGATAGCAACTATCAGTTAATCTGG	TRAC	TRBV6-2	TRBJ2-1	TGTGCCAGCAGTTACCAGCGGGAGGGCAATGAGCAGTTCTTC	3	Blood	9438	TRUE	TRUE	FALSE
TGGCGCAGTCTAGCGC-1-P190604_Blood_1	clone_P190604:10937:3	P190604	P190604_TRAV8-6_TGTGCTGCATTTTATCCGGGTGGTGGCTACAATAAGCTGATTTTT_TRAJ4:P190604_TRBV10-2_TGCGCCAGCAGCGGGGTTTTCCGCGGGGAAGCTTTCTTT_TRBJ1-1	TRAC	TRAV8-6	TRAJ4	TGTGCTGCATTTTATCCGGGTGGTGGCTACAATAAGCTGATTTTT	TRAC	TRBV10-2	TRBJ1-1	TGCGCCAGCAGCGGGGTTTTCCGCGGGGAAGCTTTCTTT	3	Blood	10937	TRUE	FALSE	FALSE
TGGCTGGAGCCAACAG-1-P190604_Blood_1	clone_P190604:10668:1	P190604	P190604_TRAV4_TGCCTCGTGGCCTGGGGGGGTTACCAGAAAGTTACCTTT_TRAJ13:P190604_TRBV6-1_TGTGCCAGCAGTGAAGATAAAGGCGCTGCCTACGAGCAGTACTTC_TRBJ2-7	TRAC	TRAV4	TRAJ13	TGCCTCGTGGCCTGGGGGGGTTACCAGAAAGTTACCTTT	TRAC	TRBV6-1	TRBJ2-7	TGTGCCAGCAGTGAAGATAAAGGCGCTGCCTACGAGCAGTACTTC	1	Blood	10668	FALSE	FALSE	FALSE
TGGCTGGGTGTGACCC-1-P190604_Blood_1	clone_P190604:10867:1	P190604	P190604_TRAV8-3_TGTGCTGTGGGTGTGCCTGGAGGAGGTGCTGACGGACTCACCTTT_TRAJ45:P190604_TRBV6-2_TGTGCCAGCAGTCCAGACTCGCGTGAGCAGTTCTTC_TRBJ2-1	TRAC	TRAV8-3	TRAJ45	TGTGCTGTGGGTGTGCCTGGAGGAGGTGCTGACGGACTCACCTTT	TRAC	TRBV6-2	TRBJ2-1	TGTGCCAGCAGTCCAGACTCGCGTGAGCAGTTCTTC	1	Blood	10867	FALSE	FALSE	FALSE
TGGTTCCTCTTGTTTG-1-P190604_Blood_1	clone_P190604:10826:1	P190604	P190604_TRAV8-3_TGTGCTGCCGTGTCAGGAAACACACCTCTTGTCTTT_TRAJ29:P190604_TRBV7-9_TGTGCCAGCAGCTTAGCGTACAACCATGAGTCTAAAACCTACAATGAGCAGTTCTTC_TRBJ2-1	TRAC	TRAV8-3	TRAJ29	TGTGCTGCCGTGTCAGGAAACACACCTCTTGTCTTT	TRAC	TRBV7-9	TRBJ2-1	TGTGCCAGCAGCTTAGCGTACAACCATGAGTCTAAAACCTACAATGAGCAGTTCTTC	1	Blood	10826	FALSE	FALSE	FALSE
TGTATTCAGCTTTGGT-1-P190604_Blood_1	clone_P190604:9520:2	P190604	P190604_TRAV12-1_TGTGTGGTGAACATCCGTGACAAGATCATCTTT_TRAJ30:P190604_TRBV7-9_TGTGCCAGCAGCTTACAGGGCAGGGAGCAGTACTTC_TRBJ2-7	TRAC	TRAV12-1	TRAJ30	TGTGTGGTGAACATCCGTGACAAGATCATCTTT	TRAC	TRBV7-9	TRBJ2-7	TGTGCCAGCAGCTTACAGGGCAGGGAGCAGTACTTC	2	Blood	9520	TRUE	FALSE	FALSE
TGTATTCAGGACTGGT-1-P190604_Blood_1	clone_P190604:10373:1	P190604	P190604_TRAV27_TGTGCAGGAGCCAGAGCTGCAGGCAACAAGCTAACTTTT_TRAJ17:P190604_TRBV11-1_TGTGCCAGCAGCCGACAGGGATCTGGAAACACCATATATTTT_TRBJ1-3	TRAC	TRAV27	TRAJ17	TGTGCAGGAGCCAGAGCTGCAGGCAACAAGCTAACTTTT	TRAC	TRBV11-1	TRBJ1-3	TGTGCCAGCAGCCGACAGGGATCTGGAAACACCATATATTTT	1	Blood	10373	FALSE	FALSE	FALSE
TGTATTCTCCCTGACT-1-P190604_Blood_1	clone_P190604:10878:1	P190604	P190604_TRAV8-3_TGTGCTGTGGTTCCGCCCCATAATGCAGGCAACATGCTCACCTTT_TRAJ39:P190604_TRBV28_TGTGCCAGCAGTTTACCGACTGAAGCTTTCTTT_TRBJ1-1	TRAC	TRAV8-3	TRAJ39	TGTGCTGTGGTTCCGCCCCATAATGCAGGCAACATGCTCACCTTT	TRAC	TRBV28	TRBJ1-1	TGTGCCAGCAGTTTACCGACTGAAGCTTTCTTT	1	Blood	10878	FALSE	FALSE	FALSE
TGTCCCAAGTCGTTTG-1-P190604_Blood_1	clone_P190604:9556:1	P190604	P190604_TRAV12-1_TGTGTGGTGGCCACTACCTCAGGAACCTACAAATACATCTTT_TRAJ40:P190604_TRBV27_TGTGCCAGCAGTTTCGCAGGGGGCTATGGCTACACCTTC_TRBJ1-2	TRAC	TRAV12-1	TRAJ40	TGTGTGGTGGCCACTACCTCAGGAACCTACAAATACATCTTT	TRAC	TRBV27	TRBJ1-2	TGTGCCAGCAGTTTCGCAGGGGGCTATGGCTACACCTTC	1	Blood	9556	FALSE	FALSE	FALSE
TGTCCCACACGAAATA-1-P190604_Blood_1	clone_P190604:10958:1	P190604	P190604_TRAV8-6_TGTGCTGTGAGTGTCGGCACTGCCAGTAAACTCACCTTT_TRAJ44:P190604_TRBV2_TGTGCCAGCAGTGAACAGCCTAATCAGCCCCAGCATTTT_TRBJ1-5	TRAC	TRAV8-6	TRAJ44	TGTGCTGTGAGTGTCGGCACTGCCAGTAAACTCACCTTT	TRAC	TRBV2	TRBJ1-5	TGTGCCAGCAGTGAACAGCCTAATCAGCCCCAGCATTTT	1	Blood	10958	FALSE	FALSE	FALSE
TTAACTCTCCAGATCA-1-P190604_Blood_1	clone_P190604:10082:2	P190604	P190604_TRAV20_TGTGCTGTGCAGGCCCGAGGTGGTGCTACAAACAAGCTCATCTTT_TRAJ32:P190604_TRBV19_TGTGCGACGGACAGGGACGGGTCCGGGGAGCTGTTTTTT_TRBJ2-2	TRAC	TRAV20	TRAJ32	TGTGCTGTGCAGGCCCGAGGTGGTGCTACAAACAAGCTCATCTTT	TRAC	TRBV19	TRBJ2-2	TGTGCGACGGACAGGGACGGGTCCGGGGAGCTGTTTTTT	2	Blood	10082	TRUE	FALSE	FALSE
TTAGGACCACCTATCC-1-P190604_Blood_1	clone_P190604:10421:60	P190604	P190604_TRAV29/DV5_TGTGCAGCAAGCGCCCATAGTGGAGGTAGCAACTATAAACTGACATTT_TRAJ53:P190604_TRBV7-9_TGTGCCACCAGATTAGGGTACGAGCAGTACTTC_TRBJ2-7	TRAC	TRAV29/DV5	TRAJ53	TGTGCAGCAAGCGCCCATAGTGGAGGTAGCAACTATAAACTGACATTT	TRAC	TRBV7-9	TRBJ2-7	TGTGCCACCAGATTAGGGTACGAGCAGTACTTC	60	Blood	10421	TRUE	FALSE	FALSE
TTAGGCAAGGACATTA-1-P190604_Blood_1	clone_P190604:10421:60	P190604	P190604_TRAV29/DV5_TGTGCAGCAAGCGCCCATAGTGGAGGTAGCAACTATAAACTGACATTT_TRAJ53:P190604_TRBV7-9_TGTGCCACCAGATTAGGGTACGAGCAGTACTTC_TRBJ2-7	TRAC	TRAV29/DV5	TRAJ53	TGTGCAGCAAGCGCCCATAGTGGAGGTAGCAACTATAAACTGACATTT	TRAC	TRBV7-9	TRBJ2-7	TGTGCCACCAGATTAGGGTACGAGCAGTACTTC	60	Blood	10421	TRUE	FALSE	FALSE
TTAGGCACACATTTCT-1-P190604_Blood_1	clone_P190604:10291:1	P190604	P190604_TRAV26-1_TGCATCGGAGGGACAGGAACCTACAAATACATCTTT_TRAJ40:P190604_TRBV7-9_TGTGCCAGCAGCTCCCCAGGGGATGAGCAGTTCTTC_TRBJ2-1	TRAC	TRAV26-1	TRAJ40	TGCATCGGAGGGACAGGAACCTACAAATACATCTTT	TRAC	TRBV7-9	TRBJ2-1	TGTGCCAGCAGCTCCCCAGGGGATGAGCAGTTCTTC	1	Blood	10291	FALSE	FALSE	FALSE
TTAGTTCGTGACAAAT-1-P190604_Blood_1	clone_P190604:9469:1	P190604	P190604_TRAV1-2_TGTGCTGTGTATGCTGGCAACAACCGTAAGCTGATTTGG_TRAJ38:P190604_TRBV7-2_TGTGCCAGCAGCCCAGGGGGCGGACGCACGGAGACCCAGTACTTC_TRBJ2-5	TRAC	TRAV1-2	TRAJ38	TGTGCTGTGTATGCTGGCAACAACCGTAAGCTGATTTGG	TRAC	TRBV7-2	TRBJ2-5	TGTGCCAGCAGCCCAGGGGGCGGACGCACGGAGACCCAGTACTTC	1	Blood	9469	FALSE	FALSE	FALSE
TTAGTTCGTGTCTGAT-1-P190604_Blood_1	clone_P190604:9407:1	P190604	P190604_TRAV1-2_TGTGCTGTGAGAGATGTGGCTGGTGGCTACAATAAGCTGATTTTT_TRAJ4:P190604_TRBV3-1_TGTGCCAGCAGCCAAGATTCTAGGGTAAAGTCTGAAAAACTGTTTTTT_TRBJ1-4	TRAC	TRAV1-2	TRAJ4	TGTGCTGTGAGAGATGTGGCTGGTGGCTACAATAAGCTGATTTTT	TRAC	TRBV3-1	TRBJ1-4	TGTGCCAGCAGCCAAGATTCTAGGGTAAAGTCTGAAAAACTGTTTTTT	1	Blood	9407	FALSE	FALSE	FALSE
TTCGAAGGTGAAATCA-1-P190604_Blood_1	clone_P190604:10421:60	P190604	P190604_TRAV29/DV5_TGTGCAGCAAGCGCCCATAGTGGAGGTAGCAACTATAAACTGACATTT_TRAJ53:P190604_TRBV7-9_TGTGCCACCAGATTAGGGTACGAGCAGTACTTC_TRBJ2-7	TRAC	TRAV29/DV5	TRAJ53	TGTGCAGCAAGCGCCCATAGTGGAGGTAGCAACTATAAACTGACATTT	TRAC	TRBV7-9	TRBJ2-7	TGTGCCACCAGATTAGGGTACGAGCAGTACTTC	60	Blood	10421	TRUE	FALSE	FALSE
TTCGAAGGTGCGATAG-1-P190604_Blood_1	clone_P190604:10044:1	P190604	P190604_TRAV2_TGTGCTGTGGAGGAGGCGGGAGGAGGAAACAAACTCACCTTT_TRAJ10:P190604_TRBV30_TGTGCCTGGAGCCAGGGGCGACCCTACGAGCAGTACTTC_TRBJ2-7	TRAC	TRAV2	TRAJ10	TGTGCTGTGGAGGAGGCGGGAGGAGGAAACAAACTCACCTTT	TRAC	TRBV30	TRBJ2-7	TGTGCCTGGAGCCAGGGGCGACCCTACGAGCAGTACTTC	1	Blood	10044	FALSE	FALSE	FALSE
TTCGGTCCACTCAGGC-1-P190604_Blood_1	clone_P190604:10208:1	P190604	P190604_TRAV23/DV6_TGTGCAGCAAGCAGAGGAAGCCAAGGAAATCTCATCTTT_TRAJ42:P190604_TRBV12-3_TGTGCCAGCAAGTACCTTCGAGTAGCCGGGGAGCTGTTTTTT_TRBJ2-2	TRAC	TRAV23/DV6	TRAJ42	TGTGCAGCAAGCAGAGGAAGCCAAGGAAATCTCATCTTT	TRAC	TRBV12-3	TRBJ2-2	TGTGCCAGCAAGTACCTTCGAGTAGCCGGGGAGCTGTTTTTT	1	Blood	10208	FALSE	FALSE	FALSE
TTCTACACAAGACGTG-1-P190604_Blood_1	clone_P190604:10711:1	P190604	P190604_TRAV41_TGTGCTGTCAGGCGGAAGGGTAACCAGTTCTATTTT_TRAJ49:P190604_TRBV20-1_TGCAGTGCTAGAAAGGGGGGCTACGATTCACCCCTCCACTTT_TRBJ1-6	TRAC	TRAV41	TRAJ49	TGTGCTGTCAGGCGGAAGGGTAACCAGTTCTATTTT	TRAC	TRBV20-1	TRBJ1-6	TGCAGTGCTAGAAAGGGGGGCTACGATTCACCCCTCCACTTT	1	Blood	10711	FALSE	FALSE	FALSE
TTCTCAACAACGATGG-1-P190604_Blood_1	clone_P190604:10736:1	P190604	P190604_TRAV5_TGTGCAGAGAGGGAAGGGTACAGCAGTGCTTCCAAGATAATCTTT_TRAJ3:P190604_TRBV15_TGTGCCACCAGCAGAGATAATCAGCCCCAGCATTTT_TRBJ1-5	TRAC	TRAV5	TRAJ3	TGTGCAGAGAGGGAAGGGTACAGCAGTGCTTCCAAGATAATCTTT	TRAC	TRBV15	TRBJ1-5	TGTGCCACCAGCAGAGATAATCAGCCCCAGCATTTT	1	Blood	10736	FALSE	FALSE	FALSE
TTCTCCTAGAGTCTGG-1-P190604_Blood_1	clone_P190604:9495:1	P190604	P190604_TRAV10_TGTGTGGTGAGCGCGAACTACAAGCTCAGCTTT_TRAJ20:P190604_TRBV9_TGTGCCAGCAGCCCCGATGGGGGCAATGAGCAGTTCTTC_TRBJ2-1	TRAC	TRAV10	TRAJ20	TGTGTGGTGAGCGCGAACTACAAGCTCAGCTTT	TRAC	TRBV9	TRBJ2-1	TGTGCCAGCAGCCCCGATGGGGGCAATGAGCAGTTCTTC	1	Blood	9495	FALSE	FALSE	FALSE
TTCTTAGCATTACCTT-1-P190604_Blood_1	clone_P190604:9676:1	P190604	P190604_TRAV12-3_TGTGCAATGAGCGGATACTCTGGGGCTGGGAGTTACCAACTCACTTTC_TRAJ28:P190604_TRBV24-1_TGTGCCACTAGCGCCACAGATACGCAGTATTTT_TRBJ2-3	TRAC	TRAV12-3	TRAJ28	TGTGCAATGAGCGGATACTCTGGGGCTGGGAGTTACCAACTCACTTTC	TRAC	TRBV24-1	TRBJ2-3	TGTGCCACTAGCGCCACAGATACGCAGTATTTT	1	Blood	9676	FALSE	FALSE	FALSE
TTGAACGCATAGACTC-1-P190604_Blood_1	clone_P190604:9307:1	P190604	P190604_TRAV1-1_TGCGCTGTGAGAGCTAATAATGCAGGCAACATGCTCACCTTT_TRAJ39:P190604_TRBV11-2_TGTGCCAGCAGTTCCGCAGAATACGAGCAGTACTTC_TRBJ2-7	TRAC	TRAV1-1	TRAJ39	TGCGCTGTGAGAGCTAATAATGCAGGCAACATGCTCACCTTT	TRAC	TRBV11-2	TRBJ2-7	TGTGCCAGCAGTTCCGCAGAATACGAGCAGTACTTC	1	Blood	9307	FALSE	FALSE	FALSE
TTGAACGGTAGAGTGC-1-P190604_Blood_1	clone_P190604:10501:1	P190604	P190604_TRAV3_TGTGCTGTGAGAGACATCGGATACAGCACCCTCACCTTT_TRAJ11:P190604_TRBV4-3_TGCGCCAGCAGCCAAGATGGGGAGAACGGGGAGCTGTTTTTT_TRBJ2-2	TRAC	TRAV3	TRAJ11	TGTGCTGTGAGAGACATCGGATACAGCACCCTCACCTTT	TRAC	TRBV4-3	TRBJ2-2	TGCGCCAGCAGCCAAGATGGGGAGAACGGGGAGCTGTTTTTT	1	Blood	10501	FALSE	FALSE	FALSE
TTGACTTGTCTAAAGA-1-P190604_Blood_1	clone_P190604:10246:1	P190604	P190604_TRAV24_TGTGCCTCCCATGGCTCTAGCAACACAGGCAAACTAATCTTT_TRAJ37:P190604_TRBV3-1_TGTGCCAGCAGCCAAATCAGCAAGAGCTCCTACGAGCAGTACTTC_TRBJ2-7	TRAC	TRAV24	TRAJ37	TGTGCCTCCCATGGCTCTAGCAACACAGGCAAACTAATCTTT	TRAC	TRBV3-1	TRBJ2-7	TGTGCCAGCAGCCAAATCAGCAAGAGCTCCTACGAGCAGTACTTC	1	Blood	10246	FALSE	FALSE	FALSE
TTGCGTCAGGAGTACC-1-P190604_Blood_1	clone_P190604:10485:1	P190604	P190604_TRAV3_TGTGCTGTGAGACCAGGCTTTCAGAAACTTGTATTT_TRAJ8:P190604_TRBV27_TGTGCCAGCAGTTTAGTAGGGGACACCGGGGAGCTGTTTTTT_TRBJ2-2	TRAC	TRAV3	TRAJ8	TGTGCTGTGAGACCAGGCTTTCAGAAACTTGTATTT	TRAC	TRBV27	TRBJ2-2	TGTGCCAGCAGTTTAGTAGGGGACACCGGGGAGCTGTTTTTT	1	Blood	10485	FALSE	FALSE	FALSE
TTGCGTCCACCCTATC-1-P190604_Blood_1	clone_P190604:9638:1	P190604	P190604_TRAV12-2_TGTGCCGTGGCCCCCCAGGCAGGAACTGCTCTGATCTTT_TRAJ15:P190604_TRBV20-1_TGCAGTGCTCTTACTAGCACCGAGGGGTATGAGCAGTTCTTC_TRBJ2-1	TRAC	TRAV12-2	TRAJ15	TGTGCCGTGGCCCCCCAGGCAGGAACTGCTCTGATCTTT	TRAC	TRBV20-1	TRBJ2-1	TGCAGTGCTCTTACTAGCACCGAGGGGTATGAGCAGTTCTTC	1	Blood	9638	FALSE	FALSE	FALSE
TTGGAACGTATGGTTC-1-P190604_Blood_1	clone_P190604:9496:1	P190604	P190604_TRAV10_TGTGTGGTGAGGGCGATAGGCTTTGGGAATGTGCTGCATTGC_TRAJ35:P190604_TRBV4-2_TGTGCCAGCAGCCAAGACAGGGCTAGCGGGGAAACCTACAATGAGCAGTTCTTC_TRBJ2-1	TRAC	TRAV10	TRAJ35	TGTGTGGTGAGGGCGATAGGCTTTGGGAATGTGCTGCATTGC	TRAC	TRBV4-2	TRBJ2-1	TGTGCCAGCAGCCAAGACAGGGCTAGCGGGGAAACCTACAATGAGCAGTTCTTC	1	Blood	9496	FALSE	FALSE	FALSE
TTGGAACGTTTCGCTC-1-P190604_Blood_1	clone_P190604:10093:1	P190604	P190604_TRAV20_TGTGCTGTGCATGACGACTACAAGCTCAGCTTT_TRAJ20:P190604_TRBV20-1_TGCAGTGCTAGAGATCGGGGCAGGGGGTACGCTGAAGCTTTCTTT_TRBJ1-1	TRAC	TRAV20	TRAJ20	TGTGCTGTGCATGACGACTACAAGCTCAGCTTT	TRAC	TRBV20-1	TRBJ1-1	TGCAGTGCTAGAGATCGGGGCAGGGGGTACGCTGAAGCTTTCTTT	1	Blood	10093	FALSE	FALSE	FALSE
TTGGAACTCCAGAAGG-1-P190604_Blood_1	clone_P190604:10421:60	P190604	P190604_TRAV29/DV5_TGTGCAGCAAGCGCCCATAGTGGAGGTAGCAACTATAAACTGACATTT_TRAJ53:P190604_TRBV7-9_TGTGCCACCAGATTAGGGTACGAGCAGTACTTC_TRBJ2-7	TRAC	TRAV29/DV5	TRAJ53	TGTGCAGCAAGCGCCCATAGTGGAGGTAGCAACTATAAACTGACATTT	TRAC	TRBV7-9	TRBJ2-7	TGTGCCACCAGATTAGGGTACGAGCAGTACTTC	60	Blood	10421	TRUE	FALSE	FALSE
TTGGCAACATCGATTG-1-P190604_Blood_1	clone_P190604:10421:60	P190604	P190604_TRAV29/DV5_TGTGCAGCAAGCGCCCATAGTGGAGGTAGCAACTATAAACTGACATTT_TRAJ53:P190604_TRBV7-9_TGTGCCACCAGATTAGGGTACGAGCAGTACTTC_TRBJ2-7	TRAC	TRAV29/DV5	TRAJ53	TGTGCAGCAAGCGCCCATAGTGGAGGTAGCAACTATAAACTGACATTT	TRAC	TRBV7-9	TRBJ2-7	TGTGCCACCAGATTAGGGTACGAGCAGTACTTC	60	Blood	10421	TRUE	FALSE	FALSE
TTGGCAAGTCTCACCT-1-P190604_Blood_1	clone_P190604:9314:1	P190604	P190604_TRAV1-1_TGCGCTGTGCTAGAAGATGACAAGATCATCTTT_TRAJ30:P190604_TRBV9_TGTGCCAGCAGCCCCGAGCAGTTCTTC_TRBJ2-1	TRAC	TRAV1-1	TRAJ30	TGCGCTGTGCTAGAAGATGACAAGATCATCTTT	TRAC	TRBV9	TRBJ2-1	TGTGCCAGCAGCCCCGAGCAGTTCTTC	1	Blood	9314	FALSE	FALSE	FALSE
TTGTAGGCACCCATGG-1-P190604_Blood_1	clone_P190604:9504:13	P190604	P190604_TRAV12-1_TGTGTGGGCCATAATGCAGGCAACATGCTCACCTTT_TRAJ39:P190604_TRBV20-1_TGCAGTGCTAGCTTGCCAGGGGCTCCTAGCAATCAGCCCCAGCATTTT_TRBJ1-5	TRAC	TRAV12-1	TRAJ39	TGTGTGGGCCATAATGCAGGCAACATGCTCACCTTT	TRAC	TRBV20-1	TRBJ1-5	TGCAGTGCTAGCTTGCCAGGGGCTCCTAGCAATCAGCCCCAGCATTTT	13	Blood	9504	TRUE	FALSE	FALSE
TTGTAGGCAGGCGATA-1-P190604_Blood_1	clone_P190604:10252:1	P190604	P190604_TRAV24_TGTGCCTTTAATGCCAGACTCATGTTT_TRAJ31:P190604_TRBV30_TGTGCCTGGAACCGGGACATCGCCTACGAGCAGTACTTC_TRBJ2-7	TRAC	TRAV24	TRAJ31	TGTGCCTTTAATGCCAGACTCATGTTT	TRAC	TRBV30	TRBJ2-7	TGTGCCTGGAACCGGGACATCGCCTACGAGCAGTACTTC	1	Blood	10252	FALSE	FALSE	FALSE
TTGTAGGGTCTGATCA-1-P190604_Blood_1	clone_P190604:9456:1	P190604	P190604_TRAV1-2_TGTGCTGTGATTGTTGACAGCTGGGGGAAATTGCAGTTT_TRAJ24:P190604_TRBV25-1_TGTGCCTCCTTTTCCAGGGTGGCCACTGAAGCTTTCTTT_TRBJ1-1	TRAC	TRAV1-2	TRAJ24	TGTGCTGTGATTGTTGACAGCTGGGGGAAATTGCAGTTT	TRAC	TRBV25-1	TRBJ1-1	TGTGCCTCCTTTTCCAGGGTGGCCACTGAAGCTTTCTTT	1	Blood	9456	FALSE	FALSE	FALSE
TTTGCGCAGTGTTGAA-1-P190604_Blood_1	clone_P190604:9328:1	P190604	P190604_TRAV1-2_TGTGCTGAGCGCAGAGGGGGAGGAGGAAACAAACTCACCTTT_TRAJ10:P190604_TRBV10-2_TGCGCCAGCAGTGGGCGGGAAACAGCTCAACAAGAGACCCAGTACTTC_TRBJ2-5	TRAC	TRAV1-2	TRAJ10	TGTGCTGAGCGCAGAGGGGGAGGAGGAAACAAACTCACCTTT	TRAC	TRBV10-2	TRBJ2-5	TGCGCCAGCAGTGGGCGGGAAACAGCTCAACAAGAGACCCAGTACTTC	1	Blood	9328	FALSE	FALSE	FALSE
TTTGGTTGTCTAGCCG-1-P190604_Blood_1	clone_P190604:10030:1	P190604	P190604_TRAV2_TGTGCTGCGACCAACCAGGCAGGAACTGCTCTGATCTTT_TRAJ15:P190604_TRBV20-1_TGCAGTGCTAGAGATCTAGCGGGAGGGCCCGGCACAGATACGCAGTATTTT_TRBJ2-3	TRAC	TRAV2	TRAJ15	TGTGCTGCGACCAACCAGGCAGGAACTGCTCTGATCTTT	TRAC	TRBV20-1	TRBJ2-3	TGCAGTGCTAGAGATCTAGCGGGAGGGCCCGGCACAGATACGCAGTATTTT	1	Blood	10030	FALSE	FALSE	FALSE
AAACCTGTCCATGAGT-1-P190604_Blood_2	clone_P190604:9833:2	P190604	P190604_TRAV14/DV4_TGTGCAATGAGAGAGGGCCCAAACAATGACATGCGCTTT_TRAJ43:P190604_TRBV4-3_TGCGCCAGCAGCCGCGACGGCGTAACAGATACGCAGTATTTT_TRBJ2-3	TRAC	TRAV14/DV4	TRAJ43	TGTGCAATGAGAGAGGGCCCAAACAATGACATGCGCTTT	TRAC	TRBV4-3	TRBJ2-3	TGCGCCAGCAGCCGCGACGGCGTAACAGATACGCAGTATTTT	2	Blood	9833	TRUE	FALSE	FALSE
AAACGGGCAGGTCTCG-1-P190604_Blood_2	clone_P190604:10772:1	P190604	P190604_TRAV8-1_TGTGCCGCCGTTACCGGCACTGCCAGTAAACTCACCTTT_TRAJ44:P190604_TRBV3-1_TGTGCCAGCAGCCGTAGCGGGGCCTCCTACGAGCAGTACTTC_TRBJ2-7	TRAC	TRAV8-1	TRAJ44	TGTGCCGCCGTTACCGGCACTGCCAGTAAACTCACCTTT	TRAC	TRBV3-1	TRBJ2-7	TGTGCCAGCAGCCGTAGCGGGGCCTCCTACGAGCAGTACTTC	1	Blood	10772	FALSE	FALSE	FALSE
AACACGTAGTACCGGA-1-P190604_Blood_2	clone_P190604:10172:3	P190604	P190604_TRAV21_TGTGCTGTGTATGACAGCTGGGGGAAATTGCAGTTT_TRAJ24:P190604_TRBV20-1_TGCAGTGCTAGGTGGACTAGCGGGAGAAGGGGTTTTGAGACCCAGTACTTC_TRBJ2-5	TRAC	TRAV21	TRAJ24	TGTGCTGTGTATGACAGCTGGGGGAAATTGCAGTTT	TRAC	TRBV20-1	TRBJ2-5	TGCAGTGCTAGGTGGACTAGCGGGAGAAGGGGTTTTGAGACCCAGTACTTC	3	Blood	10172	TRUE	FALSE	FALSE
AACACGTAGTGTGAAT-1-P190604_Blood_2	clone_P190604:9817:3	P190604	P190604_TRAV14/DV4_TGTGCAATGAGAGAGAACAACTTTGGAAATGAGAAATTAACCTTT_TRAJ48:P190604_TRBV15_TGTGCCACCAGTTTACAGGGGGCGCCGAATGAAAAACTGTTTTTT_TRBJ1-4	TRAC	TRAV14/DV4	TRAJ48	TGTGCAATGAGAGAGAACAACTTTGGAAATGAGAAATTAACCTTT	TRAC	TRBV15	TRBJ1-4	TGTGCCACCAGTTTACAGGGGGCGCCGAATGAAAAACTGTTTTTT	3	Blood	9817	TRUE	FALSE	FALSE
AACCGCGCACGAGGTA-1-P190604_Blood_2	clone_P190604:9818:1	P190604	P190604_TRAV14/DV4_TGTGCAATGAGAGAGCGGCGCAGAGATGACAAGATCATCTTT_TRAJ30:P190604_TRBV18_TGTGCCAGCTCACCATCCATTCTAAGGGATAAGGGCAATCAGCCCCAGCATTTT_TRBJ1-5	TRAC	TRAV14/DV4	TRAJ30	TGTGCAATGAGAGAGCGGCGCAGAGATGACAAGATCATCTTT	TRAC	TRBV18	TRBJ1-5	TGTGCCAGCTCACCATCCATTCTAAGGGATAAGGGCAATCAGCCCCAGCATTTT	1	Blood	9818	FALSE	FALSE	FALSE
AACGTTGAGCAACGGT-1-P190604_Blood_2	clone_P190604:10898:1	P190604	P190604_TRAV8-4_TGTGCTGTGAGGTACAGCAGTGCTTCCAAGATAATCTTT_TRAJ3:P190604_TRBV20-1_TGCAGTGCTAGTCGCACGGGGCAAGAGACCCAGTACTTC_TRBJ2-5	TRAC	TRAV8-4	TRAJ3	TGTGCTGTGAGGTACAGCAGTGCTTCCAAGATAATCTTT	TRAC	TRBV20-1	TRBJ2-5	TGCAGTGCTAGTCGCACGGGGCAAGAGACCCAGTACTTC	1	Blood	10898	FALSE	FALSE	FALSE
AACTCCCTCACTTACT-1-P190604_Blood_2	clone_P190604:10232:1	P190604	P190604_TRAV23/DV6_TGTGCAGCCGTTTCAGGAGGAGGTGCTGACGGACTCACCTTT_TRAJ45:P190604_TRBV7-2_TGTGCCAGCAGCCCGGGACTGTTAGCCAACGAGCAGTACTTC_TRBJ2-7	TRAC	TRAV23/DV6	TRAJ45	TGTGCAGCCGTTTCAGGAGGAGGTGCTGACGGACTCACCTTT	TRAC	TRBV7-2	TRBJ2-7	TGTGCCAGCAGCCCGGGACTGTTAGCCAACGAGCAGTACTTC	1	Blood	10232	FALSE	FALSE	FALSE
AACTGGTTCTTGGGTA-1-P190604_Blood_2	clone_P190604:9596:1	P190604	P190604_TRAV12-2_TGTGCCGTGAACATTGCGGACGACTACAAGCTCAGCTTT_TRAJ20:P190604_TRBV19_TGTGCCAGTAGTACCCCCGAGGGCCTCAGCACAGATACGCAGTATTTT_TRBJ2-3	TRAC	TRAV12-2	TRAJ20	TGTGCCGTGAACATTGCGGACGACTACAAGCTCAGCTTT	TRAC	TRBV19	TRBJ2-3	TGTGCCAGTAGTACCCCCGAGGGCCTCAGCACAGATACGCAGTATTTT	1	Blood	9596	FALSE	FALSE	FALSE
AACTTTCAGGACAGAA-1-P190604_Blood_2	clone_P190604:9744:1	P190604	P190604_TRAV13-1_TGTGCAGCAAGTGTGGGTGGCTACAATAAGCTGATTTTT_TRAJ4:P190604_TRBV18_TGTGCCAGCTCGCCCGGGACTAGCGAGTCCGAGCAGTACTTC_TRBJ2-7	TRAC	TRAV13-1	TRAJ4	TGTGCAGCAAGTGTGGGTGGCTACAATAAGCTGATTTTT	TRAC	TRBV18	TRBJ2-7	TGTGCCAGCTCGCCCGGGACTAGCGAGTCCGAGCAGTACTTC	1	Blood	9744	FALSE	FALSE	FALSE
AAGACCTTCGGAGGTA-1-P190604_Blood_2	clone_P190604:9504:13	P190604	P190604_TRAV12-1_TGTGTGGGCCATAATGCAGGCAACATGCTCACCTTT_TRAJ39:P190604_TRBV20-1_TGCAGTGCTAGCTTGCCAGGGGCTCCTAGCAATCAGCCCCAGCATTTT_TRBJ1-5	TRAC	TRAV12-1	TRAJ39	TGTGTGGGCCATAATGCAGGCAACATGCTCACCTTT	TRAC	TRBV20-1	TRBJ1-5	TGCAGTGCTAGCTTGCCAGGGGCTCCTAGCAATCAGCCCCAGCATTTT	13	Blood	9504	TRUE	FALSE	FALSE
AAGACCTTCTGCGTAA-1-P190604_Blood_2	clone_P190604:10085:1	P190604	P190604_TRAV20_TGTGCTGTGCAGGCGAGGCAGGGAGCCCAGAAGCTGGTATTT_TRAJ54:P190604_TRBV5-5_TGTGCCAGCAGCCTCAGGGAATCGATCTACGAGCAGTACTTC_TRBJ2-7	TRAC	TRAV20	TRAJ54	TGTGCTGTGCAGGCGAGGCAGGGAGCCCAGAAGCTGGTATTT	TRAC	TRBV5-5	TRBJ2-7	TGTGCCAGCAGCCTCAGGGAATCGATCTACGAGCAGTACTTC	1	Blood	10085	FALSE	FALSE	FALSE
AAGGAGCAGTGGGATC-1-P190604_Blood_2	clone_P190604:10249:1	P190604	P190604_TRAV24_TGTGCCTCTTTTAACACCGGTAACCAGTTCTATTTT_TRAJ49:P190604_TRBV6-5_TGTGCCAGCAGTTCGTTCCGGGGGAGGACGGGTGAAAAACTGTTTTTT_TRBJ1-4	TRAC	TRAV24	TRAJ49	TGTGCCTCTTTTAACACCGGTAACCAGTTCTATTTT	TRAC	TRBV6-5	TRBJ1-4	TGTGCCAGCAGTTCGTTCCGGGGGAGGACGGGTGAAAAACTGTTTTTT	1	Blood	10249	FALSE	FALSE	FALSE
AAGGAGCGTCGTCTTC-1-P190604_Blood_2	clone_P190604:9531:1	P190604	P190604_TRAV12-1_TGTGTGGTGAACCGAGGGGGAAACAAGCTGGTCTTT_TRAJ47:P190604_TRBV28_TGTGCCAGCAGTTTCCCAGGGGACACTGAAGCTTTCTTT_TRBJ1-1	TRAC	TRAV12-1	TRAJ47	TGTGTGGTGAACCGAGGGGGAAACAAGCTGGTCTTT	TRAC	TRBV28	TRBJ1-1	TGTGCCAGCAGTTTCCCAGGGGACACTGAAGCTTTCTTT	1	Blood	9531	FALSE	FALSE	FALSE
AAGGAGCGTGAGCGAT-1-P190604_Blood_2	clone_P190604:10521:3	P190604	P190604_TRAV3_TGTGCTGTGAGAGACTCAGGCTTTGGGAATGTGCTGCATTGC_TRAJ35:P190604_TRBV7-9_TGTGCCAGCAGCAGCAGCGGGGAGGCTTTCTTT_TRBJ1-1	TRAC	TRAV3	TRAJ35	TGTGCTGTGAGAGACTCAGGCTTTGGGAATGTGCTGCATTGC	TRAC	TRBV7-9	TRBJ1-1	TGTGCCAGCAGCAGCAGCGGGGAGGCTTTCTTT	3	Blood	10521	TRUE	FALSE	FALSE
AAGGCAGTCAGCCTAA-1-P190604_Blood_2	clone_P190604:10976:2	P190604	P190604_TRAV9-2_TGTGCTCTCGGAATTTCTTCTGGTTCTGCAAGGCAACTGACCTTT_TRAJ22:P190604_TRBV5-1_TGCGCCAGCAGCGACCTAAGTGGCACAGATACGCAGTATTTT_TRBJ2-3	TRAC	TRAV9-2	TRAJ22	TGTGCTCTCGGAATTTCTTCTGGTTCTGCAAGGCAACTGACCTTT	TRAC	TRBV5-1	TRBJ2-3	TGCGCCAGCAGCGACCTAAGTGGCACAGATACGCAGTATTTT	2	Blood	10976	TRUE	FALSE	FALSE
AAGGTTCGTCGCATCG-1-P190604_Blood_2	clone_P190604:9621:1	P190604	P190604_TRAV12-2_TGTGCCGTGACAGCAGGTATGGCCGGTAACCAGTTCTATTTT_TRAJ49:P190604_TRBV12-3_TGTGCCAGCAGCCCCCGGATAGGGGGAGCTGGAAAACTGTTTTTT_TRBJ1-4	TRAC	TRAV12-2	TRAJ49	TGTGCCGTGACAGCAGGTATGGCCGGTAACCAGTTCTATTTT	TRAC	TRBV12-3	TRBJ1-4	TGTGCCAGCAGCCCCCGGATAGGGGGAGCTGGAAAACTGTTTTTT	1	Blood	9621	FALSE	FALSE	FALSE
AAGGTTCGTCTCTTAT-1-P190604_Blood_2	clone_P190604:10931:1	P190604	P190604_TRAV8-4_TGTGCTGTGATCATTACAGGCTTTCAGAAACTTGTATTT_TRAJ8:P190604_TRBV12-4_TGTGCCAGCAGTTTAGGGGATAGCGGGAGCTCCTACGAGCAGTACTTC_TRBJ2-7	TRAC	TRAV8-4	TRAJ8	TGTGCTGTGATCATTACAGGCTTTCAGAAACTTGTATTT	TRAC	TRBV12-4	TRBJ2-7	TGTGCCAGCAGTTTAGGGGATAGCGGGAGCTCCTACGAGCAGTACTTC	1	Blood	10931	FALSE	FALSE	FALSE
AAGGTTCTCTGCGGCA-1-P190604_Blood_2	clone_P190604:10884:1	P190604	P190604_TRAV8-4_TGTGCTGTCGCCCCTTCTGGTTCTGCAAGGCAACTGACCTTT_TRAJ22:P190604_TRBV19_TGTGCCAGTAGTATACGAGGAAATGAGCAGTTCTTC_TRBJ2-1	TRAC	TRAV8-4	TRAJ22	TGTGCTGTCGCCCCTTCTGGTTCTGCAAGGCAACTGACCTTT	TRAC	TRBV19	TRBJ2-1	TGTGCCAGTAGTATACGAGGAAATGAGCAGTTCTTC	1	Blood	10884	FALSE	FALSE	FALSE
AATCCAGAGCGTCAAG-1-P190604_Blood_2	clone_P190604:10947:1	P190604	P190604_TRAV8-6_TGTGCTGTGAGTGAAACCCGAAGCCAAGGAAATCTCATCTTT_TRAJ42:P190604_TRBV6-6_TGTGCCAGCAGTTCAAACAGGGTCCCTAGCACAGATACGCAGTATTTT_TRBJ2-3	TRAC	TRAV8-6	TRAJ42	TGTGCTGTGAGTGAAACCCGAAGCCAAGGAAATCTCATCTTT	TRAC	TRBV6-6	TRBJ2-3	TGTGCCAGCAGTTCAAACAGGGTCCCTAGCACAGATACGCAGTATTTT	1	Blood	10947	FALSE	FALSE	FALSE
AATCGGTCAGCTGCTG-1-P190604_Blood_2	clone_P190604:10503:1	P190604	P190604_TRAV3_TGTGCTGTGAGAGACATGTGGGACAACTTCAACAAATTTTACTTT_TRAJ21:P190604_TRBV19_TGTGCCAGTAGTATCAGCTCCCAGGGGGTGTACGAGCAGTACTTC_TRBJ2-7	TRAC	TRAV3	TRAJ21	TGTGCTGTGAGAGACATGTGGGACAACTTCAACAAATTTTACTTT	TRAC	TRBV19	TRBJ2-7	TGTGCCAGTAGTATCAGCTCCCAGGGGGTGTACGAGCAGTACTTC	1	Blood	10503	FALSE	FALSE	FALSE
AATCGGTCATATGAGA-1-P190604_Blood_2	clone_P190604:10942:1	P190604	P190604_TRAV8-6_TGTGCTGTGAGGGGTTCAGGAAACACACCTCTTGTCTTT_TRAJ29:P190604_TRBV7-8_TGTGCCAGCAGCCCTAGCGGTCGGGTATCCTCTGGAAACACCATATATTTT_TRBJ1-3	TRAC	TRAV8-6	TRAJ29	TGTGCTGTGAGGGGTTCAGGAAACACACCTCTTGTCTTT	TRAC	TRBV7-8	TRBJ1-3	TGTGCCAGCAGCCCTAGCGGTCGGGTATCCTCTGGAAACACCATATATTTT	1	Blood	10942	FALSE	FALSE	FALSE
ACACCCTAGGCTCAGA-1-P190604_Blood_2	clone_P190604:10587:1	P190604	P190604_TRAV35_TGTGCTGGGCCCGGAGGAAGCCAAGGAAATCTCATCTTT_TRAJ42:P190604_TRBV6-6_TGTGCCAGCAGTCTATCACTCGGGGAGCTGTTTTTT_TRBJ2-2	TRAC	TRAV35	TRAJ42	TGTGCTGGGCCCGGAGGAAGCCAAGGAAATCTCATCTTT	TRAC	TRBV6-6	TRBJ2-2	TGTGCCAGCAGTCTATCACTCGGGGAGCTGTTTTTT	1	Blood	10587	FALSE	FALSE	FALSE
ACACCCTTCCGTACAA-1-P190604_Blood_2	clone_P190604:10421:60	P190604	P190604_TRAV29/DV5_TGTGCAGCAAGCGCCCATAGTGGAGGTAGCAACTATAAACTGACATTT_TRAJ53:P190604_TRBV7-9_TGTGCCACCAGATTAGGGTACGAGCAGTACTTC_TRBJ2-7	TRAC	TRAV29/DV5	TRAJ53	TGTGCAGCAAGCGCCCATAGTGGAGGTAGCAACTATAAACTGACATTT	TRAC	TRBV7-9	TRBJ2-7	TGTGCCACCAGATTAGGGTACGAGCAGTACTTC	60	Blood	10421	TRUE	FALSE	FALSE
ACACTGACATCCGTGG-1-P190604_Blood_2	clone_P190604:9936:1	P190604	P190604_TRAV17_TGTGCTACGGATTATCAGCGCGGAGGCTCAACCCTGGGGAGGCTATACTTT_TRAJ18:P190604_TRBV27_TGTGCCAGCAGTACGACAGGGACGGGTTCACCCCTCCACTTT_TRBJ1-6	TRAC	TRAV17	TRAJ18	TGTGCTACGGATTATCAGCGCGGAGGCTCAACCCTGGGGAGGCTATACTTT	TRAC	TRBV27	TRBJ1-6	TGTGCCAGCAGTACGACAGGGACGGGTTCACCCCTCCACTTT	1	Blood	9936	FALSE	FALSE	FALSE
ACAGCCGAGCTGATAA-1-P190604_Blood_2	clone_P190604:10932:1	P190604	P190604_TRAV8-4_TGTGCTGTGATCATTACGGGAGAACTGACATTT_TRAJ53:P190604_TRBV4-1_TGCGCCAGCAGCCCTACGACAGGGTCCTACGAGCAGTACTTC_TRBJ2-7	TRAC	TRAV8-4	TRAJ53	TGTGCTGTGATCATTACGGGAGAACTGACATTT	TRAC	TRBV4-1	TRBJ2-7	TGCGCCAGCAGCCCTACGACAGGGTCCTACGAGCAGTACTTC	1	Blood	10932	FALSE	FALSE	FALSE
ACAGCCGAGCTGCGAA-1-P190604_Blood_2	clone_P190604:11001:1	P190604	P190604_TRAV9-2_TGTGCTCTGAGTCTACGGGGGTCTAGCAACACAGGCAAACTAATCTTT_TRAJ37:P190604_TRBV2_TGTGCCAGCAGTGATGGGGGGGCGAGCGGGGGCCGGAAGGATACGCAGTATTTT_TRBJ2-3	TRAC	TRAV9-2	TRAJ37	TGTGCTCTGAGTCTACGGGGGTCTAGCAACACAGGCAAACTAATCTTT	TRAC	TRBV2	TRBJ2-3	TGTGCCAGCAGTGATGGGGGGGCGAGCGGGGGCCGGAAGGATACGCAGTATTTT	1	Blood	11001	FALSE	FALSE	FALSE
ACAGCTATCTGCTTGC-1-P190604_Blood_2	clone_P190604:10421:60	P190604	P190604_TRAV29/DV5_TGTGCAGCAAGCGCCCATAGTGGAGGTAGCAACTATAAACTGACATTT_TRAJ53:P190604_TRBV7-9_TGTGCCACCAGATTAGGGTACGAGCAGTACTTC_TRBJ2-7	TRAC	TRAV29/DV5	TRAJ53	TGTGCAGCAAGCGCCCATAGTGGAGGTAGCAACTATAAACTGACATTT	TRAC	TRBV7-9	TRBJ2-7	TGTGCCACCAGATTAGGGTACGAGCAGTACTTC	60	Blood	10421	TRUE	FALSE	FALSE
ACATCAGAGAAACGAG-1-P190604_Blood_2	clone_P190604:9740:1	P190604	P190604_TRAV13-1_TGTGCAGCAAGTGGAGATTCAGGAGGAGGTGCTGACGGACTCACCTTT_TRAJ45:P190604_TRBV4-1_TGCGCCAGCAGCCAAGACTGGCGGGATCACTACGAGCAGTACTTC_TRBJ2-7	TRAC	TRAV13-1	TRAJ45	TGTGCAGCAAGTGGAGATTCAGGAGGAGGTGCTGACGGACTCACCTTT	TRAC	TRBV4-1	TRBJ2-7	TGCGCCAGCAGCCAAGACTGGCGGGATCACTACGAGCAGTACTTC	1	Blood	9740	FALSE	FALSE	FALSE
ACCAGTATCGCGATCG-1-P190604_Blood_2	clone_P190604:9632:1	P190604	P190604_TRAV12-2_TGTGCCGTGAGTGAATCGAATTATGGAGGAAGCCAAGGAAATCTCATCTTT_TRAJ42:P190604_TRBV10-1_TGCGCCAGCAGTGAGTCCCTAGCGGTTGATGAGCAGTACTTC_TRBJ2-7	TRAC	TRAV12-2	TRAJ42	TGTGCCGTGAGTGAATCGAATTATGGAGGAAGCCAAGGAAATCTCATCTTT	TRAC	TRBV10-1	TRBJ2-7	TGCGCCAGCAGTGAGTCCCTAGCGGTTGATGAGCAGTACTTC	1	Blood	9632	FALSE	FALSE	FALSE
ACCAGTATCTGAAAGA-1-P190604_Blood_2	clone_P190604:10421:60	P190604	P190604_TRAV29/DV5_TGTGCAGCAAGCGCCCATAGTGGAGGTAGCAACTATAAACTGACATTT_TRAJ53:P190604_TRBV7-9_TGTGCCACCAGATTAGGGTACGAGCAGTACTTC_TRBJ2-7	TRAC	TRAV29/DV5	TRAJ53	TGTGCAGCAAGCGCCCATAGTGGAGGTAGCAACTATAAACTGACATTT	TRAC	TRBV7-9	TRBJ2-7	TGTGCCACCAGATTAGGGTACGAGCAGTACTTC	60	Blood	10421	TRUE	FALSE	FALSE
ACCGTAATCGTCTGAA-1-P190604_Blood_2	clone_P190604:10385:1	P190604	P190604_TRAV27_TGTGCAGGAGGTGTAGGCCAGAAGCTGGTATTT_TRAJ54:P190604_TRBV4-3_TGCGCCAGCAGCCAAGATCCCCGGACAGGGGGCGGGTACGAGCAGTACTTC_TRBJ2-7	TRAC	TRAV27	TRAJ54	TGTGCAGGAGGTGTAGGCCAGAAGCTGGTATTT	TRAC	TRBV4-3	TRBJ2-7	TGCGCCAGCAGCCAAGATCCCCGGACAGGGGGCGGGTACGAGCAGTACTTC	1	Blood	10385	FALSE	FALSE	FALSE
ACGAGGAGTAATCACC-1-P190604_Blood_2	clone_P190604:10530:1	P190604	P190604_TRAV3_TGTGCTGTGAGAGCCTACTCTAGCAACACAGGCAAACTAATCTTT_TRAJ37:P190604_TRBV11-1_TGTGCCAGCAGCTTAAGAGTTTCGCGGGCGTCGAACACCGGGGAGCTGTTTTTT_TRBJ2-2	TRAC	TRAV3	TRAJ37	TGTGCTGTGAGAGCCTACTCTAGCAACACAGGCAAACTAATCTTT	TRAC	TRBV11-1	TRBJ2-2	TGTGCCAGCAGCTTAAGAGTTTCGCGGGCGTCGAACACCGGGGAGCTGTTTTTT	1	Blood	10530	FALSE	FALSE	FALSE
ACGAGGAGTCTAAAGA-1-P190604_Blood_2	clone_P190604:10434:1	P190604	P190604_TRAV29/DV5_TGTGCAGCAAGCGCGCGGGACAAGATCATCTTT_TRAJ30:P190604_TRBV7-9_TGTGCCAGCAGCTTAGGGGTTTGGAATTCACCCCTCCACTTT_TRBJ1-6	TRAC	TRAV29/DV5	TRAJ30	TGTGCAGCAAGCGCGCGGGACAAGATCATCTTT	TRAC	TRBV7-9	TRBJ1-6	TGTGCCAGCAGCTTAGGGGTTTGGAATTCACCCCTCCACTTT	1	Blood	10434	FALSE	FALSE	FALSE
ACGATGTAGAGCTTCT-1-P190604_Blood_2	clone_P190604:9680:1	P190604	P190604_TRAV12-3_TGTGCAATGAGCTCCTCTAGCAACACAGGCAAACTAATCTTT_TRAJ37:P190604_TRBV19_TGTGCCAGTAGTAGAAGGGACAGGGGGCCGATCGGGGAGCTGTTTTTT_TRBJ2-2	TRAC	TRAV12-3	TRAJ37	TGTGCAATGAGCTCCTCTAGCAACACAGGCAAACTAATCTTT	TRAC	TRBV19	TRBJ2-2	TGTGCCAGTAGTAGAAGGGACAGGGGGCCGATCGGGGAGCTGTTTTTT	1	Blood	9680	FALSE	FALSE	FALSE
ACGCAGCAGCCAGTTT-1-P190604_Blood_2	clone_P190604:10100:1	P190604	P190604_TRAV20_TGTGCTGTGGAGGATTCTGGGGGTTACCAGAAAGTTACCTTT_TRAJ13:P190604_TRBV5-1_TGCGCCAGCAGTCGGACAGAAAGCTCCTACGAGCAGTACTTC_TRBJ2-7	TRAC	TRAV20	TRAJ13	TGTGCTGTGGAGGATTCTGGGGGTTACCAGAAAGTTACCTTT	TRAC	TRBV5-1	TRBJ2-7	TGCGCCAGCAGTCGGACAGAAAGCTCCTACGAGCAGTACTTC	1	Blood	10100	FALSE	FALSE	FALSE
ACGCCGAGTTCGTCTC-1-P190604_Blood_2	clone_P190604:10491:1	P190604	P190604_TRAV3_TGTGCTGTGAGAGACACTCCAGGAACTGCTCTGATCTTT_TRAJ15:P190604_TRBV20-1_TGCAGTGCTAGTCTCGGGACTAGCGGGAGAAATGAGCAGTTCTTC_TRBJ2-1	TRAC	TRAV3	TRAJ15	TGTGCTGTGAGAGACACTCCAGGAACTGCTCTGATCTTT	TRAC	TRBV20-1	TRBJ2-1	TGCAGTGCTAGTCTCGGGACTAGCGGGAGAAATGAGCAGTTCTTC	1	Blood	10491	FALSE	FALSE	FALSE
ACGGAGATCAGCCTAA-1-P190604_Blood_2	clone_P190604:10885:1	P190604	P190604_TRAV8-4_TGTGCTGTGAAGAATGGAGGAAGCCAAGGAAATCTCATCTTT_TRAJ42:P190604_TRBV2_TGTGCCAGCAGTGAGGGTAGGGTGGGAAACACTGAAGCTTTCTTT_TRBJ1-1	TRAC	TRAV8-4	TRAJ42	TGTGCTGTGAAGAATGGAGGAAGCCAAGGAAATCTCATCTTT	TRAC	TRBV2	TRBJ1-1	TGTGCCAGCAGTGAGGGTAGGGTGGGAAACACTGAAGCTTTCTTT	1	Blood	10885	FALSE	FALSE	FALSE
ACGGCCATCGGCGCTA-1-P190604_Blood_2	clone_P190604:10665:6	P190604	P190604_TRAV4_TGCCTCGTGCGGAGCTCTACCGGCACTGCCAGTAAACTCACCTTT_TRAJ44:P190604_TRBV7-3_TGTGCCAGCAGCTTAATAGCGGGAGGGATCACAGATACGCAGTATTTT_TRBJ2-3	TRAC	TRAV4	TRAJ44	TGCCTCGTGCGGAGCTCTACCGGCACTGCCAGTAAACTCACCTTT	TRAC	TRBV7-3	TRBJ2-3	TGTGCCAGCAGCTTAATAGCGGGAGGGATCACAGATACGCAGTATTTT	6	Blood	10665	TRUE	FALSE	FALSE
ACGGGCTCACCACGTG-1-P190604_Blood_2	clone_P190604:11025:1	P190604	P190604_TRAV9-2_TGTGCTCTGAGTGGGGTACGGGGGGGCAGGAGAGCACTTACTTTT_TRAJ5:P190604_TRBV5-4_TGTGCCAGCAGCTTGGTTGAGGACACTGAAGCTTTCTTT_TRBJ1-1	TRAC	TRAV9-2	TRAJ5	TGTGCTCTGAGTGGGGTACGGGGGGGCAGGAGAGCACTTACTTTT	TRAC	TRBV5-4	TRBJ1-1	TGTGCCAGCAGCTTGGTTGAGGACACTGAAGCTTTCTTT	1	Blood	11025	FALSE	FALSE	FALSE
ACGGGCTCAGCATACT-1-P190604_Blood_2	clone_P190604:10236:2	P190604	P190604_TRAV23/DV6_TGTGCAGCGGGGTGTTCCGGCCAGGCAGGAACTGCTCTGATCTTT_TRAJ15:P190604_TRBV10-2_TGCGCCAGCAGCGGGGTTTTCCGCGGGGAAGCTTTCTTT_TRBJ1-1	TRAC	TRAV23/DV6	TRAJ15	TGTGCAGCGGGGTGTTCCGGCCAGGCAGGAACTGCTCTGATCTTT	TRAC	TRBV10-2	TRBJ1-1	TGCGCCAGCAGCGGGGTTTTCCGCGGGGAAGCTTTCTTT	2	Blood	10236	TRUE	FALSE	FALSE
ACGGGCTTCGCAAACT-1-P190604_Blood_2	clone_P190604:10719:1	P190604	P190604_TRAV41_TGTGCTGTCGGGCGTGGCTCTAGGTTGACCTTT_TRAJ58:P190604_TRBV2_TGTGCCAGCACGACGGAAGAGACCCAGTACTTC_TRBJ2-5	TRAC	TRAV41	TRAJ58	TGTGCTGTCGGGCGTGGCTCTAGGTTGACCTTT	TRAC	TRBV2	TRBJ2-5	TGTGCCAGCACGACGGAAGAGACCCAGTACTTC	1	Blood	10719	FALSE	FALSE	FALSE
ACGGGTCCAAATTGCC-1-P190604_Blood_2	clone_P190604:10362:1	P190604	P190604_TRAV27_TGTGCAGGACCCCAGTACTATGGGAACAACAGACTCGCTTTT_TRAJ7:P190604_TRBV7-9_TGTGCCAGCAGCCCCCCCGGACTAGCCCAACCTGGGCAGTTCTTC_TRBJ2-1	TRAC	TRAV27	TRAJ7	TGTGCAGGACCCCAGTACTATGGGAACAACAGACTCGCTTTT	TRAC	TRBV7-9	TRBJ2-1	TGTGCCAGCAGCCCCCCCGGACTAGCCCAACCTGGGCAGTTCTTC	1	Blood	10362	FALSE	FALSE	FALSE
ACGTCAACATGAAGTA-1-P190604_Blood_2	clone_P190604:10109:1	P190604	P190604_TRAV21_TGTGCTACGATAGGCTTTGGGAATGTGCTGCATTGC_TRAJ35:P190604_TRBV19_TGTGCCAGTAGCCCTGACAGGGTTCGGCCCCAGCATTTT_TRBJ1-5	TRAC	TRAV21	TRAJ35	TGTGCTACGATAGGCTTTGGGAATGTGCTGCATTGC	TRAC	TRBV19	TRBJ1-5	TGTGCCAGTAGCCCTGACAGGGTTCGGCCCCAGCATTTT	1	Blood	10109	FALSE	FALSE	FALSE
ACGTCAAGTTGAGGTG-1-P190604_Blood_2	clone_P190604:10421:60	P190604	P190604_TRAV29/DV5_TGTGCAGCAAGCGCCCATAGTGGAGGTAGCAACTATAAACTGACATTT_TRAJ53:P190604_TRBV7-9_TGTGCCACCAGATTAGGGTACGAGCAGTACTTC_TRBJ2-7	TRAC	TRAV29/DV5	TRAJ53	TGTGCAGCAAGCGCCCATAGTGGAGGTAGCAACTATAAACTGACATTT	TRAC	TRBV7-9	TRBJ2-7	TGTGCCACCAGATTAGGGTACGAGCAGTACTTC	60	Blood	10421	TRUE	FALSE	FALSE
ACGTCAATCTGCCCTA-1-P190604_Blood_2	clone_P190604:10440:1	P190604	P190604_TRAV29/DV5_TGTGCAGCAAGCGCGTATAACACCGACAAGCTCATCTTT_TRAJ34:P190604_TRBV10-2_TGCGCCAGCACAGCAGGTGGCGGGGAGCTGTTTTTT_TRBJ2-2	TRAC	TRAV29/DV5	TRAJ34	TGTGCAGCAAGCGCGTATAACACCGACAAGCTCATCTTT	TRAC	TRBV10-2	TRBJ2-2	TGCGCCAGCACAGCAGGTGGCGGGGAGCTGTTTTTT	1	Blood	10440	FALSE	FALSE	FALSE
ACTATCTGTAATCGTC-1-P190604_Blood_2	clone_P190604:10674:1	P190604	P190604_TRAV4_TGCCTCGTGGGGGGCTATGGTCAGAATTTTGTCTTT_TRAJ26:P190604_TRBV5-6_TGTGCCAGCAGCTTGACTAGCGGGACGTCACGGCGCACAGATACGCAGTATTTT_TRBJ2-3	TRAC	TRAV4	TRAJ26	TGCCTCGTGGGGGGCTATGGTCAGAATTTTGTCTTT	TRAC	TRBV5-6	TRBJ2-3	TGTGCCAGCAGCTTGACTAGCGGGACGTCACGGCGCACAGATACGCAGTATTTT	1	Blood	10674	FALSE	FALSE	FALSE
ACTGAGTGTTTGACAC-1-P190604_Blood_2	clone_P190604:10389:1	P190604	P190604_TRAV27_TGTGCAGGCCGAAATGCTGGCAACAACCGTAAGCTGATTTGG_TRAJ38:P190604_TRBV28_TGTGCCAGCAGCTTAGCGGGAAAGTTAAAGCAGTTCTTC_TRBJ2-1	TRAC	TRAV27	TRAJ38	TGTGCAGGCCGAAATGCTGGCAACAACCGTAAGCTGATTTGG	TRAC	TRBV28	TRBJ2-1	TGTGCCAGCAGCTTAGCGGGAAAGTTAAAGCAGTTCTTC	1	Blood	10389	FALSE	FALSE	FALSE
ACTGATGAGTCTTGCA-1-P190604_Blood_2	clone_P190604:10273:1	P190604	P190604_TRAV25_TGTGCAGGGCAAACTCAGGGCGGATCTGAAAAGCTGGTCTTT_TRAJ57:P190604_TRBV4-1_TGCGCCAGCAGCCAATTAGGACTATATGGCTACACCTTC_TRBJ1-2	TRAC	TRAV25	TRAJ57	TGTGCAGGGCAAACTCAGGGCGGATCTGAAAAGCTGGTCTTT	TRAC	TRBV4-1	TRBJ1-2	TGCGCCAGCAGCCAATTAGGACTATATGGCTACACCTTC	1	Blood	10273	FALSE	FALSE	FALSE
ACTGATGGTGAAATCA-1-P190604_Blood_2	clone_P190604:10421:60	P190604	P190604_TRAV29/DV5_TGTGCAGCAAGCGCCCATAGTGGAGGTAGCAACTATAAACTGACATTT_TRAJ53:P190604_TRBV7-9_TGTGCCACCAGATTAGGGTACGAGCAGTACTTC_TRBJ2-7	TRAC	TRAV29/DV5	TRAJ53	TGTGCAGCAAGCGCCCATAGTGGAGGTAGCAACTATAAACTGACATTT	TRAC	TRBV7-9	TRBJ2-7	TGTGCCACCAGATTAGGGTACGAGCAGTACTTC	60	Blood	10421	TRUE	FALSE	FALSE
ACTGCTCAGACAATAC-1-P190604_Blood_2	clone_P190604:10353:1	P190604	P190604_TRAV26-2_TGCATCCTGAGTGTCACCGGTAACCAGTTCTATTTT_TRAJ49:P190604_TRBV6-6_TGTGCCAGCAGACAGCACCGGGACAATGAGCAGTTCTTC_TRBJ2-1	TRAC	TRAV26-2	TRAJ49	TGCATCCTGAGTGTCACCGGTAACCAGTTCTATTTT	TRAC	TRBV6-6	TRBJ2-1	TGTGCCAGCAGACAGCACCGGGACAATGAGCAGTTCTTC	1	Blood	10353	FALSE	FALSE	FALSE
ACTGCTCTCACATACG-1-P190604_Blood_2	clone_P190604:10989:1	P190604	P190604_TRAV9-2_TGTGCTCTGAGCCAATTTGCTGGTGGTACTAGCTATGGAAAGCTGACATTT_TRAJ52:P190604_TRBV6-1_TGTGCCAGCAGTGGACCCGGGACCGGGGACACTGAAGCTTTCTTT_TRBJ1-1	TRAC	TRAV9-2	TRAJ52	TGTGCTCTGAGCCAATTTGCTGGTGGTACTAGCTATGGAAAGCTGACATTT	TRAC	TRBV6-1	TRBJ1-1	TGTGCCAGCAGTGGACCCGGGACCGGGGACACTGAAGCTTTCTTT	1	Blood	10989	FALSE	FALSE	FALSE
ACTGTCCCAAAGCGGT-1-P190604_Blood_2	clone_P190604:10824:1	P190604	P190604_TRAV8-3_TGTGCCGTGGGGGGGGACAAGATCATCTTT_TRAJ30:P190604_TRBV20-1_TGCAGTGCTAGAGTTCCGACAGGAGAACGTGGCACTGAAGCTTTCTTT_TRBJ1-1	TRAC	TRAV8-3	TRAJ30	TGTGCCGTGGGGGGGGACAAGATCATCTTT	TRAC	TRBV20-1	TRBJ1-1	TGCAGTGCTAGAGTTCCGACAGGAGAACGTGGCACTGAAGCTTTCTTT	1	Blood	10824	FALSE	FALSE	FALSE
ACTTACTCATCGATTG-1-P190604_Blood_2	clone_P190604:10288:1	P190604	P190604_TRAV26-1_TGCATCAGTTCTGGTTCTGCAAGGCAACTGACCTTT_TRAJ22:P190604_TRBV7-9_TGTGCCAGCAGCTCTAGCGGGAGTGGCTACAATGAGCAGTTCTTC_TRBJ2-1	TRAC	TRAV26-1	TRAJ22	TGCATCAGTTCTGGTTCTGCAAGGCAACTGACCTTT	TRAC	TRBV7-9	TRBJ2-1	TGTGCCAGCAGCTCTAGCGGGAGTGGCTACAATGAGCAGTTCTTC	1	Blood	10288	FALSE	FALSE	FALSE
ACTTGTTCAAGCGATG-1-P190604_Blood_2	clone_P190604:10638:1	P190604	P190604_TRAV38-2/DV8_TGTGCTTATAGGAGTGGGGATAGGGGCGGATCTGAAAAGCTGGTCTTT_TRAJ57:P190604_TRBV5-1_TGCGCCAGCAGCCCCAGGGTAGGAGAGACCCAGTACTTC_TRBJ2-5	TRAC	TRAV38-2/DV8	TRAJ57	TGTGCTTATAGGAGTGGGGATAGGGGCGGATCTGAAAAGCTGGTCTTT	TRAC	TRBV5-1	TRBJ2-5	TGCGCCAGCAGCCCCAGGGTAGGAGAGACCCAGTACTTC	1	Blood	10638	FALSE	FALSE	FALSE
ACTTTCAAGGTCGGAT-1-P190604_Blood_2	clone_P190604:10848:10	P190604	P190604_TRAV8-3_TGTGCTGTGGGTCCCGTCGACTTTGGAAATGAGAAATTAACCTTT_TRAJ48:P190604_TRBV27_TGTGCCAGCAGTTCAGGCACAGATACGCAGTATTTT_TRBJ2-3	TRAC	TRAV8-3	TRAJ48	TGTGCTGTGGGTCCCGTCGACTTTGGAAATGAGAAATTAACCTTT	TRAC	TRBV27	TRBJ2-3	TGTGCCAGCAGTTCAGGCACAGATACGCAGTATTTT	10	Blood	10848	TRUE	FALSE	FALSE
ACTTTCAGTTCGTGAT-1-P190604_Blood_2	clone_P190604:10817:1	P190604	P190604_TRAV8-2_TGTGTTGTGAGTGGGGGCTCAACCCTGGGGAGGCTATACTTT_TRAJ18:P190604_TRBV18_TGTGCCAGCTCACCGGACTCGGCCACTGAAGCTTTCTTT_TRBJ1-1	TRAC	TRAV8-2	TRAJ18	TGTGTTGTGAGTGGGGGCTCAACCCTGGGGAGGCTATACTTT	TRAC	TRBV18	TRBJ1-1	TGTGCCAGCTCACCGGACTCGGCCACTGAAGCTTTCTTT	1	Blood	10817	FALSE	FALSE	FALSE
ACTTTCATCGCCAGCA-1-P190604_Blood_2	clone_P190604:9523:1	P190604	P190604_TRAV12-1_TGTGTGGTGAACATGAAGGGCTTTCAGAAACTTGTATTT_TRAJ8:P190604_TRBV6-1_TGTGCCAGCAGTGACTTTGGGGCCAACGTCCTGACTTTC_TRBJ2-6	TRAC	TRAV12-1	TRAJ8	TGTGTGGTGAACATGAAGGGCTTTCAGAAACTTGTATTT	TRAC	TRBV6-1	TRBJ2-6	TGTGCCAGCAGTGACTTTGGGGCCAACGTCCTGACTTTC	1	Blood	9523	FALSE	FALSE	FALSE
AGAATAGAGAACTGTA-1-P190604_Blood_2	clone_P190604:10801:1	P190604	P190604_TRAV8-2_TGTGTTGTGACCCCGGTAGGAGATGACAAGATCATCTTT_TRAJ30:P190604_TRBV27_TGTGCCAGCAGTTCCTACCCCGGGACAGGGGGGTACGAGCAGTACTTC_TRBJ2-7	TRAC	TRAV8-2	TRAJ30	TGTGTTGTGACCCCGGTAGGAGATGACAAGATCATCTTT	TRAC	TRBV27	TRBJ2-7	TGTGCCAGCAGTTCCTACCCCGGGACAGGGGGGTACGAGCAGTACTTC	1	Blood	10801	FALSE	FALSE	FALSE
AGAATAGTCGGAAATA-1-P190604_Blood_2	clone_P190604:9637:5	P190604	P190604_TRAV12-2_TGTGCCGTGGATTCGAACTCAAATTCCGGGTATGCACTCAACTTC_TRAJ41:P190604_TRBV7-3_TGTGCCAGCAGCTTAAGACAGGGCGTGGAGGATACGCAGTATTTT_TRBJ2-3	TRAC	TRAV12-2	TRAJ41	TGTGCCGTGGATTCGAACTCAAATTCCGGGTATGCACTCAACTTC	TRAC	TRBV7-3	TRBJ2-3	TGTGCCAGCAGCTTAAGACAGGGCGTGGAGGATACGCAGTATTTT	5	Blood	9637	TRUE	FALSE	FALSE
AGACGTTAGACAGAGA-1-P190604_Blood_2	clone_P190604:10295:5	P190604	P190604_TRAV26-1_TGCATCGTCAATTCAGGATACAGCACCCTCACCTTT_TRAJ11:P190604_TRBV11-2_TGTGCCAGCAGCTTAGGGCACCGGGACAGGCGGTTTCATGAGCAGTTCTTC_TRBJ2-1	TRAC	TRAV26-1	TRAJ11	TGCATCGTCAATTCAGGATACAGCACCCTCACCTTT	TRAC	TRBV11-2	TRBJ2-1	TGTGCCAGCAGCTTAGGGCACCGGGACAGGCGGTTTCATGAGCAGTTCTTC	5	Blood	10295	TRUE	FALSE	FALSE
AGAGCGATCACTCCTG-1-P190604_Blood_2	clone_P190604:9950:1	P190604	P190604_TRAV17_TGTGCTACGTCTGTAGGAGGAAAGCTTATCTTC_TRAJ23:P190604_TRBV20-1_TGCAGTACCCAGCTGGGGGCCGCAACTAATGAAAAACTGTTTTTT_TRBJ1-4	TRAC	TRAV17	TRAJ23	TGTGCTACGTCTGTAGGAGGAAAGCTTATCTTC	TRAC	TRBV20-1	TRBJ1-4	TGCAGTACCCAGCTGGGGGCCGCAACTAATGAAAAACTGTTTTTT	1	Blood	9950	FALSE	FALSE	FALSE
AGAGCGATCGGATGGA-1-P190604_Blood_2	clone_P190604:9759:5	P190604	P190604_TRAV13-1_TGTGCAGCTTCTCTCCGTGGTGGTACTAGCTATGGAAAGCTGACATTT_TRAJ52:P190604_TRBV20-1_TGCAGTGCTAGGTCAGGATATTTCGGGGAGCTGTTTTTT_TRBJ2-2	TRAC	TRAV13-1	TRAJ52	TGTGCAGCTTCTCTCCGTGGTGGTACTAGCTATGGAAAGCTGACATTT	TRAC	TRBV20-1	TRBJ2-2	TGCAGTGCTAGGTCAGGATATTTCGGGGAGCTGTTTTTT	5	Blood	9759	TRUE	FALSE	FALSE
AGAGCTTCAGCGTAAG-1-P190604_Blood_2	clone_P190604:9836:1	P190604	P190604_TRAV14/DV4_TGTGCAATGAGAGAGGGCCGTCGGACCTCTGGGGGTTACCAGAAAGTTACCTTT_TRAJ13:P190604_TRBV24-1_TGTGCCACCAGTGGGCAAAATAGCAATCAGCCCCAGCATTTT_TRBJ1-5	TRAC	TRAV14/DV4	TRAJ13	TGTGCAATGAGAGAGGGCCGTCGGACCTCTGGGGGTTACCAGAAAGTTACCTTT	TRAC	TRBV24-1	TRBJ1-5	TGTGCCACCAGTGGGCAAAATAGCAATCAGCCCCAGCATTTT	1	Blood	9836	FALSE	FALSE	FALSE
AGAGCTTTCAAGCCTA-1-P190604_Blood_2	clone_P190604:9759:5	P190604	P190604_TRAV13-1_TGTGCAGCTTCTCTCCGTGGTGGTACTAGCTATGGAAAGCTGACATTT_TRAJ52:P190604_TRBV20-1_TGCAGTGCTAGGTCAGGATATTTCGGGGAGCTGTTTTTT_TRBJ2-2	TRAC	TRAV13-1	TRAJ52	TGTGCAGCTTCTCTCCGTGGTGGTACTAGCTATGGAAAGCTGACATTT	TRAC	TRBV20-1	TRBJ2-2	TGCAGTGCTAGGTCAGGATATTTCGGGGAGCTGTTTTTT	5	Blood	9759	TRUE	FALSE	FALSE
AGAGTGGAGCGTTCCG-1-P190604_Blood_2	clone_P190604:10456:1	P190604	P190604_TRAV29/DV5_TGTGCAGCAAGGTCGGTCAATACCGGCACTGCCAGTAAACTCACCTTT_TRAJ44:P190604_TRBV7-2_TGTGCCAGCAGCCCCCGGGACGGACAAGAGACCCAGTACTTC_TRBJ2-5	TRAC	TRAV29/DV5	TRAJ44	TGTGCAGCAAGGTCGGTCAATACCGGCACTGCCAGTAAACTCACCTTT	TRAC	TRBV7-2	TRBJ2-5	TGTGCCAGCAGCCCCCGGGACGGACAAGAGACCCAGTACTTC	1	Blood	10456	FALSE	FALSE	FALSE
AGAGTGGCAAGCCCAC-1-P190604_Blood_2	clone_P190604:10498:1	P190604	P190604_TRAV3_TGTGCTGTGAGAGACATACTCACGGGAGGAGGAAACAAACTCACCTTT_TRAJ10:P190604_TRBV5-1_TGCGCCAGCAGCTTGGAGATTGACACGGAGACCCAGTACTTC_TRBJ2-5	TRAC	TRAV3	TRAJ10	TGTGCTGTGAGAGACATACTCACGGGAGGAGGAAACAAACTCACCTTT	TRAC	TRBV5-1	TRBJ2-5	TGCGCCAGCAGCTTGGAGATTGACACGGAGACCCAGTACTTC	1	Blood	10498	FALSE	FALSE	FALSE
AGAGTGGTCAGCTTAG-1-P190604_Blood_2	clone_P190604:9696:1	P190604	P190604_TRAV13-1_TGTGCAGCAAAGGTAGTCTTTGGAAATGAGAAATTAACCTTT_TRAJ48:P190604_TRBV3-1_TGTGCCAGCAGCCTTTCGAGGTATGGGACCGGGGAGCTGTTTTTT_TRBJ2-2	TRAC	TRAV13-1	TRAJ48	TGTGCAGCAAAGGTAGTCTTTGGAAATGAGAAATTAACCTTT	TRAC	TRBV3-1	TRBJ2-2	TGTGCCAGCAGCCTTTCGAGGTATGGGACCGGGGAGCTGTTTTTT	1	Blood	9696	FALSE	FALSE	FALSE
AGAGTGGTCTCCAACC-1-P190604_Blood_2	clone_P190604:9648:5	P190604	P190604_TRAV12-2_TGTGCCGTTTATTCAGGAGGAGGTGCTGACGGACTCACCTTT_TRAJ45:P190604_TRBV11-2_TGTGCCAGCAGCTTGATGGAGAACTACAATGAGCAGTTCTTC_TRBJ2-1	TRAC	TRAV12-2	TRAJ45	TGTGCCGTTTATTCAGGAGGAGGTGCTGACGGACTCACCTTT	TRAC	TRBV11-2	TRBJ2-1	TGTGCCAGCAGCTTGATGGAGAACTACAATGAGCAGTTCTTC	5	Blood	9648	TRUE	FALSE	FALSE
AGATCTGAGACTAGGC-1-P190604_Blood_2	clone_P190604:10409:1	P190604	P190604_TRAV29/DV5_TGTGCAGCAAGCCTCATCAAAGCTGCAGGCAACAAGCTAACTTTT_TRAJ17:P190604_TRBV28_TGTGCCAGCAGTCCCGTAGCGGGAAAGGACGATAACGAGACCCAGTACTTC_TRBJ2-5	TRAC	TRAV29/DV5	TRAJ17	TGTGCAGCAAGCCTCATCAAAGCTGCAGGCAACAAGCTAACTTTT	TRAC	TRBV28	TRBJ2-5	TGTGCCAGCAGTCCCGTAGCGGGAAAGGACGATAACGAGACCCAGTACTTC	1	Blood	10409	FALSE	FALSE	FALSE
AGATCTGCACATCTTT-1-P190604_Blood_2	clone_P190604:9527:1	P190604	P190604_TRAV12-1_TGTGTGGTGAACATGGGCAACACCGACAAGCTCATCTTT_TRAJ34:P190604_TRBV20-1_TGCAGTGCTAGAGATCTCCGGACAGGGAACACAGATACGCAGTATTTT_TRBJ2-3	TRAC	TRAV12-1	TRAJ34	TGTGTGGTGAACATGGGCAACACCGACAAGCTCATCTTT	TRAC	TRBV20-1	TRBJ2-3	TGCAGTGCTAGAGATCTCCGGACAGGGAACACAGATACGCAGTATTTT	1	Blood	9527	FALSE	FALSE	FALSE
AGATCTGTCTCGAGTA-1-P190604_Blood_2	clone_P190604:10161:1	P190604	P190604_TRAV21_TGTGCTGTGCCCCTGGGGGGCTACAATAAGCTGATTTTT_TRAJ4:P190604_TRBV20-1_TGCAGTGCTAGTCCCCTTGGAGCGGGAGACACAGATACGCAGTATTTT_TRBJ2-3	TRAC	TRAV21	TRAJ4	TGTGCTGTGCCCCTGGGGGGCTACAATAAGCTGATTTTT	TRAC	TRBV20-1	TRBJ2-3	TGCAGTGCTAGTCCCCTTGGAGCGGGAGACACAGATACGCAGTATTTT	1	Blood	10161	FALSE	FALSE	FALSE
AGATTGCAGTCCCACG-1-P190604_Blood_2	clone_P190604:9826:1	P190604	P190604_TRAV14/DV4_TGTGCAATGAGAGAGGCTAACTTTGGAAATGAGAAATTAACCTTT_TRAJ48:P190604_TRBV20-1_TGCAGTGCTAAATGGTTCCAAGCCCGGGGTGAGCAGTTCTTC_TRBJ2-1	TRAC	TRAV14/DV4	TRAJ48	TGTGCAATGAGAGAGGCTAACTTTGGAAATGAGAAATTAACCTTT	TRAC	TRBV20-1	TRBJ2-1	TGCAGTGCTAAATGGTTCCAAGCCCGGGGTGAGCAGTTCTTC	1	Blood	9826	FALSE	FALSE	FALSE
AGCAGCCGTATAAACG-1-P190604_Blood_2	clone_P190604:9893:1	P190604	P190604_TRAV17_TGTGCTACGAACACCGGTAACCAGTTCTATTTT_TRAJ49:P190604_TRBV29-1_TGCAGCGTCCTAGACTACTACAATGAGCAGTTCTTC_TRBJ2-1	TRAC	TRAV17	TRAJ49	TGTGCTACGAACACCGGTAACCAGTTCTATTTT	TRAC	TRBV29-1	TRBJ2-1	TGCAGCGTCCTAGACTACTACAATGAGCAGTTCTTC	1	Blood	9893	FALSE	FALSE	FALSE
AGCCTAAAGGTGTGGT-1-P190604_Blood_2	clone_P190604:10144:1	P190604	P190604_TRAV21_TGTGCTGTGAGCTCGGATTCAGGAAACACACCTCTTGTCTTT_TRAJ29:P190604_TRBV20-1_TGCAGTGACGGGCGGGGGTACAACAATGAGCAGTTCTTC_TRBJ2-1	TRAC	TRAV21	TRAJ29	TGTGCTGTGAGCTCGGATTCAGGAAACACACCTCTTGTCTTT	TRAC	TRBV20-1	TRBJ2-1	TGCAGTGACGGGCGGGGGTACAACAATGAGCAGTTCTTC	1	Blood	10144	FALSE	FALSE	FALSE
AGCCTAACATCGATTG-1-P190604_Blood_2	clone_P190604:10230:1	P190604	P190604_TRAV23/DV6_TGTGCAGCATGCGGGTTGGCGGATAGCAGCTATAAATTGATCTTC_TRAJ12:P190604_TRBV28_TGTGCCAGCAGCCCAAAATGGAGCACTAATGAAAAACTGTTTTTT_TRBJ1-4	TRAC	TRAV23/DV6	TRAJ12	TGTGCAGCATGCGGGTTGGCGGATAGCAGCTATAAATTGATCTTC	TRAC	TRBV28	TRBJ1-4	TGTGCCAGCAGCCCAAAATGGAGCACTAATGAAAAACTGTTTTTT	1	Blood	10230	FALSE	FALSE	FALSE
AGCGGTCAGGCGCTCT-1-P190604_Blood_2	clone_P190604:10664:1	P190604	P190604_TRAV4_TGCCTCGTGAGTAATGCTGGTGGTACTAGCTATGGAAAGCTGACATTT_TRAJ52:P190604_TRBV19_TGTGCCAGTAGTATCGGGTCTGGGTCCTACGAGCAGTACTTC_TRBJ2-7	TRAC	TRAV4	TRAJ52	TGCCTCGTGAGTAATGCTGGTGGTACTAGCTATGGAAAGCTGACATTT	TRAC	TRBV19	TRBJ2-7	TGTGCCAGTAGTATCGGGTCTGGGTCCTACGAGCAGTACTTC	1	Blood	10664	FALSE	FALSE	FALSE
AGCGTCGCATACTACG-1-P190604_Blood_2	clone_P190604:10000:1	P190604	P190604_TRAV19_TGTGCTCTGAGTGAGGCGCCTACGAACAGAGATGACAAGATCATCTTT_TRAJ30:P190604_TRBV28_TGTGCCAGCAGTTTCCTCTACGATCGGGGGGTGTCCGAAGAGACCCAGTACTTC_TRBJ2-5	TRAC	TRAV19	TRAJ30	TGTGCTCTGAGTGAGGCGCCTACGAACAGAGATGACAAGATCATCTTT	TRAC	TRBV28	TRBJ2-5	TGTGCCAGCAGTTTCCTCTACGATCGGGGGGTGTCCGAAGAGACCCAGTACTTC	1	Blood	10000	FALSE	FALSE	FALSE
AGCGTCGTCACAGGCC-1-P190604_Blood_2	clone_P190604:10115:29	P190604	P190604_TRAV21_TGTGCTGCGGGGATGGATAGCAACTATCAGTTAATCTGG_TRAJ33:P190604_TRBV27_TGTGCCAGCAGTCCTCGGACAGGGACCGGCGAGCAGTACTTC_TRBJ2-7	TRAC	TRAV21	TRAJ33	TGTGCTGCGGGGATGGATAGCAACTATCAGTTAATCTGG	TRAC	TRBV27	TRBJ2-7	TGTGCCAGCAGTCCTCGGACAGGGACCGGCGAGCAGTACTTC	29	Blood	10115	TRUE	FALSE	FALSE
AGCTCCTCAGACGCTC-1-P190604_Blood_2	clone_P190604:9794:1	P190604	P190604_TRAV13-2_TGTGCAGAGAGCTATGGAGGAAGCCAAGGAAATCTCATCTTT_TRAJ42:P190604_TRBV7-9_TGTGCCAGCAGCTTAATGGGACAGGGTTTAGATACGCAGTATTTT_TRBJ2-3	TRAC	TRAV13-2	TRAJ42	TGTGCAGAGAGCTATGGAGGAAGCCAAGGAAATCTCATCTTT	TRAC	TRBV7-9	TRBJ2-3	TGTGCCAGCAGCTTAATGGGACAGGGTTTAGATACGCAGTATTTT	1	Blood	9794	FALSE	FALSE	FALSE
AGGGAGTAGTACGTTC-1-P190604_Blood_2	clone_P190604:10967:1	P190604	P190604_TRAV8-6_TGTGCTGTGTTCCTTTCTGGGGGTTACCAGAAAGTTACCTTT_TRAJ13:P190604_TRBV7-9_TGTGCCAGCAGCTTAGGCGGCCGGGTGGACTATGGCTACACCTTC_TRBJ1-2	TRAC	TRAV8-6	TRAJ13	TGTGCTGTGTTCCTTTCTGGGGGTTACCAGAAAGTTACCTTT	TRAC	TRBV7-9	TRBJ1-2	TGTGCCAGCAGCTTAGGCGGCCGGGTGGACTATGGCTACACCTTC	1	Blood	10967	FALSE	FALSE	FALSE
AGGGTGACACCAACCG-1-P190604_Blood_2	clone_P190604:10619:1	P190604	P190604_TRAV38-1_TGTGCTTTCGAGGGCAAAGCTGCAGGCAACAAGCTAACTTTT_TRAJ17:P190604_TRBV7-8_TGTGCCAGCAGCCTTATTGGGGCCCCTACAGATACGCAGTATTTT_TRBJ2-3	TRAC	TRAV38-1	TRAJ17	TGTGCTTTCGAGGGCAAAGCTGCAGGCAACAAGCTAACTTTT	TRAC	TRBV7-8	TRBJ2-3	TGTGCCAGCAGCCTTATTGGGGCCCCTACAGATACGCAGTATTTT	1	Blood	10619	FALSE	FALSE	FALSE
AGGGTGATCAGGTTCA-1-P190604_Blood_2	clone_P190604:11033:1	P190604	P190604_TRAV9-2_TGTGCTCTGATTAAAGCTGCAGGCAACAAGCTAACTTTT_TRAJ17:P190604_TRBV6-2_TGTGCCAGCAGTTACGCCCCTAGGGGTGCGCCCTACGAGCAGTACTTC_TRBJ2-7	TRAC	TRAV9-2	TRAJ17	TGTGCTCTGATTAAAGCTGCAGGCAACAAGCTAACTTTT	TRAC	TRBV6-2	TRBJ2-7	TGTGCCAGCAGTTACGCCCCTAGGGGTGCGCCCTACGAGCAGTACTTC	1	Blood	11033	FALSE	FALSE	FALSE
AGGTCATAGAGACTAT-1-P190604_Blood_2	clone_P190604:9611:6	P190604	P190604_TRAV12-2_TGTGCCGTGAACGGGGCTTCTGGTTCTGCAAGGCAACTGACCTTT_TRAJ22:P190604_TRBV6-1_TGTGCCAGCACCGGGACAGGGCTTAACGAGCAGTACTTC_TRBJ2-7	TRAC	TRAV12-2	TRAJ22	TGTGCCGTGAACGGGGCTTCTGGTTCTGCAAGGCAACTGACCTTT	TRAC	TRBV6-1	TRBJ2-7	TGTGCCAGCACCGGGACAGGGCTTAACGAGCAGTACTTC	6	Blood	9611	TRUE	FALSE	FALSE
AGGTCATGTAGCCTCG-1-P190604_Blood_2	clone_P190604:9549:1	P190604	P190604_TRAV12-1_TGTGTGGTGAGGCTGTACAGCAGTGCTTCCAAGATAATCTTT_TRAJ3:P190604_TRBV30_TGTGCCGGGAACTACAGGGCGGATGCTTTCTTT_TRBJ1-1	TRAC	TRAV12-1	TRAJ3	TGTGTGGTGAGGCTGTACAGCAGTGCTTCCAAGATAATCTTT	TRAC	TRBV30	TRBJ1-1	TGTGCCGGGAACTACAGGGCGGATGCTTTCTTT	1	Blood	9549	FALSE	FALSE	FALSE
AGGTCCGGTTTGTGTG-1-P190604_Blood_2	clone_P190604:9975:1	P190604	P190604_TRAV19_TGTGCTCTGAGGGGCTCTTCAGGAGGAGGTGCTGACGGACTCACCTTT_TRAJ45:P190604_TRBV7-9_TGTGCCAGCAGCCCTGGAGGACCGCCAAGCTCCTATAATTCACCCCTCCACTTT_TRBJ1-6	TRAC	TRAV19	TRAJ45	TGTGCTCTGAGGGGCTCTTCAGGAGGAGGTGCTGACGGACTCACCTTT	TRAC	TRBV7-9	TRBJ1-6	TGTGCCAGCAGCCCTGGAGGACCGCCAAGCTCCTATAATTCACCCCTCCACTTT	1	Blood	9975	FALSE	FALSE	FALSE
AGTCTTTCACAGCCCA-1-P190604_Blood_2	clone_P190604:9505:1	P190604	P190604_TRAV12-1_TGTGTGGGGGGTATCAATAACAATGACATGCGCTTT_TRAJ43:P190604_TRBV3-1_TGTGCCAGCAGCCAGGACCCCGGCACGGGGCAGTTCTTC_TRBJ2-1	TRAC	TRAV12-1	TRAJ43	TGTGTGGGGGGTATCAATAACAATGACATGCGCTTT	TRAC	TRBV3-1	TRBJ2-1	TGTGCCAGCAGCCAGGACCCCGGCACGGGGCAGTTCTTC	1	Blood	9505	FALSE	FALSE	FALSE
AGTCTTTGTATGGTTC-1-P190604_Blood_2	clone_P190604:9862:1	P190604	P190604_TRAV14/DV4_TGTGCAATGAGTGCCCTTTCTGGTGGCTACAATAAGCTGATTTTT_TRAJ4:P190604_TRBV5-6_TGTGCCAGCAGCTTGTCCCCGTCCAGCAATCAGCCCCAGCATTTT_TRBJ1-5	TRAC	TRAV14/DV4	TRAJ4	TGTGCAATGAGTGCCCTTTCTGGTGGCTACAATAAGCTGATTTTT	TRAC	TRBV5-6	TRBJ1-5	TGTGCCAGCAGCTTGTCCCCGTCCAGCAATCAGCCCCAGCATTTT	1	Blood	9862	FALSE	FALSE	FALSE
AGTCTTTTCACCCGAG-1-P190604_Blood_2	clone_P190604:9844:1	P190604	P190604_TRAV14/DV4_TGTGCAATGAGAGAGGTCATGGATAGCAGCTATAAATTGATCTTC_TRAJ12:P190604_TRBV18_TGTGCCAGCTCACCACGACAGGGATCACAAGAGACCCAGTACTTC_TRBJ2-5	TRAC	TRAV14/DV4	TRAJ12	TGTGCAATGAGAGAGGTCATGGATAGCAGCTATAAATTGATCTTC	TRAC	TRBV18	TRBJ2-5	TGTGCCAGCTCACCACGACAGGGATCACAAGAGACCCAGTACTTC	1	Blood	9844	FALSE	FALSE	FALSE
AGTGAGGCACCATCCT-1-P190604_Blood_2	clone_P190604:10787:1	P190604	P190604_TRAV8-1_TGTGCCGTGACCTCGCGGAGCAACACAGGCAAACTAATCTTT_TRAJ37:P190604_TRBV28_TGTGCCAGCAGTACGCAGGGGGCGAACACTGAAGCTTTCTTT_TRBJ1-1	TRAC	TRAV8-1	TRAJ37	TGTGCCGTGACCTCGCGGAGCAACACAGGCAAACTAATCTTT	TRAC	TRBV28	TRBJ1-1	TGTGCCAGCAGTACGCAGGGGGCGAACACTGAAGCTTTCTTT	1	Blood	10787	FALSE	FALSE	FALSE
AGTGTCATCTGCCAGG-1-P190604_Blood_2	clone_P190604:9605:1	P190604	P190604_TRAV12-2_TGTGCCGTGAACGCGAACACTGGAGCCAATAGTAAGCTGACATTT_TRAJ56:P190604_TRBV28_TGTGCCAGCAGCTGGGGAGGGAATGGCTACACCTTC_TRBJ1-2	TRAC	TRAV12-2	TRAJ56	TGTGCCGTGAACGCGAACACTGGAGCCAATAGTAAGCTGACATTT	TRAC	TRBV28	TRBJ1-2	TGTGCCAGCAGCTGGGGAGGGAATGGCTACACCTTC	1	Blood	9605	FALSE	FALSE	FALSE
ATAACGCCACCATGTA-1-P190604_Blood_2	clone_P190604:9514:1	P190604	P190604_TRAV12-1_TGTGTGGTGAACACCCTTAATGCTGGCAACAACCGTAAGCTGATTTGG_TRAJ38:P190604_TRBV28_TGTGCCAGCACCTATGGGGGGAGCTCCTATAATTCACCCCTCCACTTT_TRBJ1-6	TRAC	TRAV12-1	TRAJ38	TGTGTGGTGAACACCCTTAATGCTGGCAACAACCGTAAGCTGATTTGG	TRAC	TRBV28	TRBJ1-6	TGTGCCAGCACCTATGGGGGGAGCTCCTATAATTCACCCCTCCACTTT	1	Blood	9514	FALSE	FALSE	FALSE
ATAACGCTCTTCGGTC-1-P190604_Blood_2	clone_P190604:10859:1	P190604	P190604_TRAV8-3_TGTGCTGTGGGTGCGGGGGTTGATATACTCACGGGAGGAGGAAACAAACTCACCTTT_TRAJ10:P190604_TRBV9_TGTGCCAGCAGCGTAGGGACTCTGAAAAACATTCAGTACTTC_TRBJ2-4	TRAC	TRAV8-3	TRAJ10	TGTGCTGTGGGTGCGGGGGTTGATATACTCACGGGAGGAGGAAACAAACTCACCTTT	TRAC	TRBV9	TRBJ2-4	TGTGCCAGCAGCGTAGGGACTCTGAAAAACATTCAGTACTTC	1	Blood	10859	FALSE	FALSE	FALSE
ATAAGAGGTGTGCCTG-1-P190604_Blood_2	clone_P190604:9305:1	P190604	P190604_TRAV1-1_TGCGCTGTGAGAGATGAGGCCAATGCAGGCAAATCAACCTTT_TRAJ27:P190604_TRBV20-1_TGCAGTGCTAGAGGGGAGACAGAGAGCTCCTACGAGCAGTACTTC_TRBJ2-7	TRAC	TRAV1-1	TRAJ27	TGCGCTGTGAGAGATGAGGCCAATGCAGGCAAATCAACCTTT	TRAC	TRBV20-1	TRBJ2-7	TGCAGTGCTAGAGGGGAGACAGAGAGCTCCTACGAGCAGTACTTC	1	Blood	9305	FALSE	FALSE	FALSE
ATAAGAGTCATCTGCC-1-P190604_Blood_2	clone_P190604:9392:1	P190604	P190604_TRAV1-2_TGTGCTGTGAGAGATCGGGAAACGGGCAGGAGAGCACTTACTTTT_TRAJ5:P190604_TRBV4-1_TGCGCCAGCAGCCATGCGGAAGGGGGCGTTGAGACCCAGTACTTC_TRBJ2-5	TRAC	TRAV1-2	TRAJ5	TGTGCTGTGAGAGATCGGGAAACGGGCAGGAGAGCACTTACTTTT	TRAC	TRBV4-1	TRBJ2-5	TGCGCCAGCAGCCATGCGGAAGGGGGCGTTGAGACCCAGTACTTC	1	Blood	9392	FALSE	FALSE	FALSE
ATAGACCCACGTAAGG-1-P190604_Blood_2	clone_P190604:10124:1	P190604	P190604_TRAV21_TGTGCTGTCCCCCTCTTGGGGCCTGGAGGCAAATCAACCTTT_TRAJ27:P190604_TRBV4-1_TGCGCCAGCAGCCAAGGAGTCGATGATTGGGGCTCCCGGGTTACAGATACGCAGTATTTT_TRBJ2-3	TRAC	TRAV21	TRAJ27	TGTGCTGTCCCCCTCTTGGGGCCTGGAGGCAAATCAACCTTT	TRAC	TRBV4-1	TRBJ2-3	TGCGCCAGCAGCCAAGGAGTCGATGATTGGGGCTCCCGGGTTACAGATACGCAGTATTTT	1	Blood	10124	FALSE	FALSE	FALSE
ATCACGAAGGGCATGT-1-P190604_Blood_2	clone_P190604:10421:60	P190604	P190604_TRAV29/DV5_TGTGCAGCAAGCGCCCATAGTGGAGGTAGCAACTATAAACTGACATTT_TRAJ53:P190604_TRBV7-9_TGTGCCACCAGATTAGGGTACGAGCAGTACTTC_TRBJ2-7	TRAC	TRAV29/DV5	TRAJ53	TGTGCAGCAAGCGCCCATAGTGGAGGTAGCAACTATAAACTGACATTT	TRAC	TRBV7-9	TRBJ2-7	TGTGCCACCAGATTAGGGTACGAGCAGTACTTC	60	Blood	10421	TRUE	FALSE	FALSE
ATCACGAGTGAGTATA-1-P190604_Blood_2	clone_P190604:9915:8	P190604	P190604_TRAV17_TGTGCTACGGACGCCTTATCAGGAACCTACAAATACATCTTT_TRAJ40:P190604_TRBV13_TGTGCCAGCAGCTTAGGGCCCCCACTAGCGGGACAATACGAGCAGTACTTC_TRBJ2-7	TRAC	TRAV17	TRAJ40	TGTGCTACGGACGCCTTATCAGGAACCTACAAATACATCTTT	TRAC	TRBV13	TRBJ2-7	TGTGCCAGCAGCTTAGGGCCCCCACTAGCGGGACAATACGAGCAGTACTTC	8	Blood	9915	TRUE	FALSE	FALSE
ATCACGATCGCCCTTA-1-P190604_Blood_2	clone_P190604:9665:1	P190604	P190604_TRAV12-3_TGTGCAATGAGCGACTCCCCCGTCGACTTTGGAAATGAGAAATTAACCTTT_TRAJ48:P190604_TRBV28_TGTGCCAGCAGTCCCACGGGGATGGACGAGCAGTACTTC_TRBJ2-7	TRAC	TRAV12-3	TRAJ48	TGTGCAATGAGCGACTCCCCCGTCGACTTTGGAAATGAGAAATTAACCTTT	TRAC	TRBV28	TRBJ2-7	TGTGCCAGCAGTCCCACGGGGATGGACGAGCAGTACTTC	1	Blood	9665	FALSE	FALSE	FALSE
ATCATCTAGGACACCA-1-P190604_Blood_2	clone_P190604:9602:5	P190604	P190604_TRAV12-2_TGTGCCGTGAACCTCTTCCTTTATGGTGGTGCTACAAACAAGCTCATCTTT_TRAJ32:P190604_TRBV6-2_TGTGCCAGCAGTTACATACCCAGGGAAACCTACGAGCAGTACTTC_TRBJ2-7	TRAC	TRAV12-2	TRAJ32	TGTGCCGTGAACCTCTTCCTTTATGGTGGTGCTACAAACAAGCTCATCTTT	TRAC	TRBV6-2	TRBJ2-7	TGTGCCAGCAGTTACATACCCAGGGAAACCTACGAGCAGTACTTC	5	Blood	9602	TRUE	FALSE	FALSE
ATCATCTCATTAGGCT-1-P190604_Blood_2	clone_P190604:10649:1	P190604	P190604_TRAV38-2/DV8_TGTGCTTATGGGGAAGCTGGAGCCAATAGTAAGCTGACATTT_TRAJ56:P190604_TRBV27_TGTGCCAGCAGCCGGCACTTCCTCTCCTACGAGCAGTACTTC_TRBJ2-7	TRAC	TRAV38-2/DV8	TRAJ56	TGTGCTTATGGGGAAGCTGGAGCCAATAGTAAGCTGACATTT	TRAC	TRBV27	TRBJ2-7	TGTGCCAGCAGCCGGCACTTCCTCTCCTACGAGCAGTACTTC	1	Blood	10649	FALSE	FALSE	FALSE
ATCATCTGTGTGGTTT-1-P190604_Blood_2	clone_P190604:9841:1	P190604	P190604_TRAV14/DV4_TGTGCAATGAGAGAGGGGTTCACGGGAGGAGGAAACAAACTCACCTTT_TRAJ10:P190604_TRBV10-3_TGTGCCATCACCCAAGACCTGGGAGACACTGAAGCTTTCTTT_TRBJ1-1	TRAC	TRAV14/DV4	TRAJ10	TGTGCAATGAGAGAGGGGTTCACGGGAGGAGGAAACAAACTCACCTTT	TRAC	TRBV10-3	TRBJ1-1	TGTGCCATCACCCAAGACCTGGGAGACACTGAAGCTTTCTTT	1	Blood	9841	FALSE	FALSE	FALSE
ATCATCTTCCCAAGTA-1-P190604_Blood_2	clone_P190604:10005:1	P190604	P190604_TRAV19_TGTGCTCTGAGTGAGGCGTATTATAACACCGACAAGCTCATCTTT_TRAJ34:P190604_TRBV7-6_TGTGCCAGCAGCTTAGCGGGACCGACGAACACCGGGGAGCTGTTTTTT_TRBJ2-2	TRAC	TRAV19	TRAJ34	TGTGCTCTGAGTGAGGCGTATTATAACACCGACAAGCTCATCTTT	TRAC	TRBV7-6	TRBJ2-2	TGTGCCAGCAGCTTAGCGGGACCGACGAACACCGGGGAGCTGTTTTTT	1	Blood	10005	FALSE	FALSE	FALSE
ATCATGGTCTATCCCG-1-P190604_Blood_2	clone_P190604:10848:10	P190604	P190604_TRAV8-3_TGTGCTGTGGGTCCCGTCGACTTTGGAAATGAGAAATTAACCTTT_TRAJ48:P190604_TRBV27_TGTGCCAGCAGTTCAGGCACAGATACGCAGTATTTT_TRBJ2-3	TRAC	TRAV8-3	TRAJ48	TGTGCTGTGGGTCCCGTCGACTTTGGAAATGAGAAATTAACCTTT	TRAC	TRBV27	TRBJ2-3	TGTGCCAGCAGTTCAGGCACAGATACGCAGTATTTT	10	Blood	10848	TRUE	FALSE	FALSE
ATCCACCCACGAAATA-1-P190604_Blood_2	clone_P190604:10010:1	P190604	P190604_TRAV19_TGTGCTCTGAGTGAGGGGGGTAGCAGCTATAAATTGATCTTC_TRAJ12:P190604_TRBV5-1_TGCGCCAGCAGCGTAACAGGGGCCACCGGGGAGCTGTTTTTT_TRBJ2-2	TRAC	TRAV19	TRAJ12	TGTGCTCTGAGTGAGGGGGGTAGCAGCTATAAATTGATCTTC	TRAC	TRBV5-1	TRBJ2-2	TGCGCCAGCAGCGTAACAGGGGCCACCGGGGAGCTGTTTTTT	1	Blood	10010	FALSE	FALSE	FALSE
ATCGAGTAGAAGGCCT-1-P190604_Blood_2	clone_P190604:9717:1	P190604	P190604_TRAV13-1_TGTGCAGCAAGTAGGGAGGATAGCAGCTATAAATTGATCTTC_TRAJ12:P190604_TRBV5-1_TGCGCCAGCAGCTTGCTAGCGGGTTTCTCCTACGAGCAGTACTTC_TRBJ2-7	TRAC	TRAV13-1	TRAJ12	TGTGCAGCAAGTAGGGAGGATAGCAGCTATAAATTGATCTTC	TRAC	TRBV5-1	TRBJ2-7	TGCGCCAGCAGCTTGCTAGCGGGTTTCTCCTACGAGCAGTACTTC	1	Blood	9717	FALSE	FALSE	FALSE
ATCGAGTAGAGTGAGA-1-P190604_Blood_2	clone_P190604:10285:1	P190604	P190604_TRAV25_TGTGCTAAAACCAGTGGCTCTAGGTTGACCTTT_TRAJ58:P190604_TRBV10-3_TGTGCCATCAGCGGGACAGCGTCTAACTATGGCTACACCTTC_TRBJ1-2	TRAC	TRAV25	TRAJ58	TGTGCTAAAACCAGTGGCTCTAGGTTGACCTTT	TRAC	TRBV10-3	TRBJ1-2	TGTGCCATCAGCGGGACAGCGTCTAACTATGGCTACACCTTC	1	Blood	10285	FALSE	FALSE	FALSE
ATCTACTGTTCAGACT-1-P190604_Blood_2	clone_P190604:9406:1	P190604	P190604_TRAV1-2_TGTGCTGTGAGAGATGGGGACTATCAGTTAATCTGG_TRAJ33:P190604_TRBV6-4_TGTGCCAGCAGCCCACAGAGCACAGATACGCAGTATTTT_TRBJ2-3	TRAC	TRAV1-2	TRAJ33	TGTGCTGTGAGAGATGGGGACTATCAGTTAATCTGG	TRAC	TRBV6-4	TRBJ2-3	TGTGCCAGCAGCCCACAGAGCACAGATACGCAGTATTTT	1	Blood	9406	FALSE	TRUE	FALSE
ATCTACTGTTTGGGCC-1-P190604_Blood_2	clone_P190604:10163:12	P190604	P190604_TRAV21_TGTGCTGTGGAGGATAGCAACTATCAGTTAATCTGG_TRAJ33:P190604_TRBV5-1_TGCGCCAGCCGAGATACCATCGGGACAGACGACTATGGCTACACCTTC_TRBJ1-2	TRAC	TRAV21	TRAJ33	TGTGCTGTGGAGGATAGCAACTATCAGTTAATCTGG	TRAC	TRBV5-1	TRBJ1-2	TGCGCCAGCCGAGATACCATCGGGACAGACGACTATGGCTACACCTTC	12	Blood	10163	TRUE	FALSE	FALSE
ATCTGCCAGCATCATC-1-P190604_Blood_2	clone_P190604:9832:1	P190604	P190604_TRAV14/DV4_TGTGCAATGAGAGAGGGCCAATGGAACACCGACAAGCTCATCTTT_TRAJ34:P190604_TRBV25-1_TGTGCCAGCAGTGATGGGGGAAAACTGTTTTTT_TRBJ1-4	TRAC	TRAV14/DV4	TRAJ34	TGTGCAATGAGAGAGGGCCAATGGAACACCGACAAGCTCATCTTT	TRAC	TRBV25-1	TRBJ1-4	TGTGCCAGCAGTGATGGGGGAAAACTGTTTTTT	1	Blood	9832	FALSE	FALSE	FALSE
ATCTGCCCACAACGTT-1-P190604_Blood_2	clone_P190604:10510:1	P190604	P190604_TRAV3_TGTGCTGTGAGAGACCTCCGCGACAAAGCTGCAGGCAACAAGCTAACTTTT_TRAJ17:P190604_TRBV7-9_TGTGCCAGCAGCTTAGTGCTAGCGGGAACTAATGAGCAGTTCTTC_TRBJ2-1	TRAC	TRAV3	TRAJ17	TGTGCTGTGAGAGACCTCCGCGACAAAGCTGCAGGCAACAAGCTAACTTTT	TRAC	TRBV7-9	TRBJ2-1	TGTGCCAGCAGCTTAGTGCTAGCGGGAACTAATGAGCAGTTCTTC	1	Blood	10510	FALSE	FALSE	FALSE
ATGAGGGAGATATACG-1-P190604_Blood_2	clone_P190604:10339:1	P190604	P190604_TRAV26-2_TGCATCCTGAAGGATAACTATGGTCAGAATTTTGTCTTT_TRAJ26:P190604_TRBV5-1_TGCGCCAGCAGCGGAGGACTAGCGGGAGGGCGGCGGGAGACCCAGTACTTC_TRBJ2-5	TRAC	TRAV26-2	TRAJ26	TGCATCCTGAAGGATAACTATGGTCAGAATTTTGTCTTT	TRAC	TRBV5-1	TRBJ2-5	TGCGCCAGCAGCGGAGGACTAGCGGGAGGGCGGCGGGAGACCCAGTACTTC	1	Blood	10339	FALSE	FALSE	FALSE
ATGCGATTCCGAACGC-1-P190604_Blood_2	clone_P190604:9824:1	P190604	P190604_TRAV14/DV4_TGTGCAATGAGAGAGGCCCCATACTCTGGGGCTGGGAGTTACCAACTCACTTTC_TRAJ28:P190604_TRBV7-9_TGTGCCAGCAGCGGGACTAGCGGGAGGGAAGAGACCCAGTACTTC_TRBJ2-5	TRAC	TRAV14/DV4	TRAJ28	TGTGCAATGAGAGAGGCCCCATACTCTGGGGCTGGGAGTTACCAACTCACTTTC	TRAC	TRBV7-9	TRBJ2-5	TGTGCCAGCAGCGGGACTAGCGGGAGGGAAGAGACCCAGTACTTC	1	Blood	9824	FALSE	FALSE	FALSE
ATTACTCGTCATGCAT-1-P190604_Blood_2	clone_P190604:9636:1	P190604	P190604_TRAV12-2_TGTGCCGTGGATCAAACTGGGGCAAACAACCTCTTCTTT_TRAJ36:P190604_TRBV2_TGTGCCAGCAGTGTGGGACAGGCCGTCAATGAGCAGTTCTTC_TRBJ2-1	TRAC	TRAV12-2	TRAJ36	TGTGCCGTGGATCAAACTGGGGCAAACAACCTCTTCTTT	TRAC	TRBV2	TRBJ2-1	TGTGCCAGCAGTGTGGGACAGGCCGTCAATGAGCAGTTCTTC	1	Blood	9636	FALSE	FALSE	FALSE
ATTATCCGTTACAGAA-1-P190604_Blood_2	clone_P190604:9499:3	P190604	P190604_TRAV12-1_TGTGCGAGGCGGTACTCTGGGGCTGGGAGTTACCAACTCACTTTC_TRAJ28:P190604_TRBV12-3_TGTGCCAGCAGTCGGGGAACTGGCTACACCTTC_TRBJ1-2	TRAC	TRAV12-1	TRAJ28	TGTGCGAGGCGGTACTCTGGGGCTGGGAGTTACCAACTCACTTTC	TRAC	TRBV12-3	TRBJ1-2	TGTGCCAGCAGTCGGGGAACTGGCTACACCTTC	3	Blood	9499	TRUE	FALSE	FALSE
ATTCTACCAATGAATG-1-P190604_Blood_2	clone_P190604:10425:1	P190604	P190604_TRAV29/DV5_TGTGCAGCAAGCGCGAAGGACTTTGGAAATGAGAAATTAACCTTT_TRAJ48:P190604_TRBV18_TGTGCCAGCTCACCTGGCAGGGGGCTACACGAGCAGTACTTC_TRBJ2-7	TRAC	TRAV29/DV5	TRAJ48	TGTGCAGCAAGCGCGAAGGACTTTGGAAATGAGAAATTAACCTTT	TRAC	TRBV18	TRBJ2-7	TGTGCCAGCTCACCTGGCAGGGGGCTACACGAGCAGTACTTC	1	Blood	10425	FALSE	FALSE	FALSE
ATTGGACCATATGAGA-1-P190604_Blood_2	clone_P190604:10879:1	P190604	P190604_TRAV8-3_TGTGCTGTGGTTTACTATGGGAACAACAGACTCGCTTTT_TRAJ7:P190604_TRBV28_TGTGCCAGCAGTTCCCGGGGACAGCTTAACACTGAAGCTTTCTTT_TRBJ1-1	TRAC	TRAV8-3	TRAJ7	TGTGCTGTGGTTTACTATGGGAACAACAGACTCGCTTTT	TRAC	TRBV28	TRBJ1-1	TGTGCCAGCAGTTCCCGGGGACAGCTTAACACTGAAGCTTTCTTT	1	Blood	10879	FALSE	FALSE	FALSE
ATTGGACTCCCTTGCA-1-P190604_Blood_2	clone_P190604:9373:1	P190604	P190604_TRAV1-2_TGTGCTGTGAGAGATAACTATGGTCAGAATTTTGTCTTT_TRAJ26:P190604_TRBV6-5_TGTGCCAGCAGTTACGTCAGGGATAATGAAAAACTGTTTTTT_TRBJ1-4	TRAC	TRAV1-2	TRAJ26	TGTGCTGTGAGAGATAACTATGGTCAGAATTTTGTCTTT	TRAC	TRBV6-5	TRBJ1-4	TGTGCCAGCAGTTACGTCAGGGATAATGAAAAACTGTTTTTT	1	Blood	9373	FALSE	FALSE	FALSE
ATTGGTGCAAGTTGTC-1-P190604_Blood_2	clone_P190604:9625:1	P190604	P190604_TRAV12-2_TGTGCCGTGAGAACGGGCAGGAGAGCACTTACTTTT_TRAJ5:P190604_TRBV6-1_TGTGCCACCATTGGGGGGGGGCTGAATGAGCAGTTCTTC_TRBJ2-1	TRAC	TRAV12-2	TRAJ5	TGTGCCGTGAGAACGGGCAGGAGAGCACTTACTTTT	TRAC	TRBV6-1	TRBJ2-1	TGTGCCACCATTGGGGGGGGGCTGAATGAGCAGTTCTTC	1	Blood	9625	FALSE	FALSE	FALSE
ATTGGTGTCGCGATCG-1-P190604_Blood_2	clone_P190604:9994:1	P190604	P190604_TRAV19_TGTGCTCTGAGTGAGGCAGATAATGCAGGCAACATGCTCACCTTT_TRAJ39:P190604_TRBV9_TGTGCCAGCAGTGTTGAAGGGGGGAGTCATAATTCACCCCTCCACTTT_TRBJ1-6	TRAC	TRAV19	TRAJ39	TGTGCTCTGAGTGAGGCAGATAATGCAGGCAACATGCTCACCTTT	TRAC	TRBV9	TRBJ1-6	TGTGCCAGCAGTGTTGAAGGGGGGAGTCATAATTCACCCCTCCACTTT	1	Blood	9994	FALSE	FALSE	FALSE
CAACCTCTCAGAGACG-1-P190604_Blood_2	clone_P190604:9782:1	P190604	P190604_TRAV13-2_TGTGCAGAGAATTCGGGTCAGGGAGCCCAGAAGCTGGTATTT_TRAJ54:P190604_TRBV7-8_TGTGCCAGCAGCGTGAATTCTGGGGAATGGGGCAATGAGCAGTTCTTC_TRBJ2-1	TRAC	TRAV13-2	TRAJ54	TGTGCAGAGAATTCGGGTCAGGGAGCCCAGAAGCTGGTATTT	TRAC	TRBV7-8	TRBJ2-1	TGTGCCAGCAGCGTGAATTCTGGGGAATGGGGCAATGAGCAGTTCTTC	1	Blood	9782	FALSE	FALSE	FALSE
CAACTAGAGGGATACC-1-P190604_Blood_2	clone_P190604:10421:60	P190604	P190604_TRAV29/DV5_TGTGCAGCAAGCGCCCATAGTGGAGGTAGCAACTATAAACTGACATTT_TRAJ53:P190604_TRBV7-9_TGTGCCACCAGATTAGGGTACGAGCAGTACTTC_TRBJ2-7	TRAC	TRAV29/DV5	TRAJ53	TGTGCAGCAAGCGCCCATAGTGGAGGTAGCAACTATAAACTGACATTT	TRAC	TRBV7-9	TRBJ2-7	TGTGCCACCAGATTAGGGTACGAGCAGTACTTC	60	Blood	10421	TRUE	FALSE	FALSE
CAAGGCCAGGACGAAA-1-P190604_Blood_2	clone_P190604:10421:60	P190604	P190604_TRAV29/DV5_TGTGCAGCAAGCGCCCATAGTGGAGGTAGCAACTATAAACTGACATTT_TRAJ53:P190604_TRBV7-9_TGTGCCACCAGATTAGGGTACGAGCAGTACTTC_TRBJ2-7	TRAC	TRAV29/DV5	TRAJ53	TGTGCAGCAAGCGCCCATAGTGGAGGTAGCAACTATAAACTGACATTT	TRAC	TRBV7-9	TRBJ2-7	TGTGCCACCAGATTAGGGTACGAGCAGTACTTC	60	Blood	10421	TRUE	FALSE	FALSE
CAAGTTGAGCTGAACG-1-P190604_Blood_2	clone_P190604:9967:1	P190604	P190604_TRAV19_TGTGCTCTGACTAGCAACACAGGCAAACTAATCTTT_TRAJ37:P190604_TRBV7-8_TGTGCCAGCAGCTTCAGACAGAATGAAAAACTGTTTTTT_TRBJ1-4	TRAC	TRAV19	TRAJ37	TGTGCTCTGACTAGCAACACAGGCAAACTAATCTTT	TRAC	TRBV7-8	TRBJ1-4	TGTGCCAGCAGCTTCAGACAGAATGAAAAACTGTTTTTT	1	Blood	9967	FALSE	FALSE	FALSE
CAAGTTGCATTATCTC-1-P190604_Blood_2	clone_P190604:9693:1	P190604	P190604_TRAV13-1_TGTGCACTTTATAACCAGGGAGGAAAGCTTATCTTC_TRAJ23:P190604_TRBV12-3_TGTGCCAGCAGCCAATACTGGGACAATTCCTACGAGCAGTACTTC_TRBJ2-7	TRAC	TRAV13-1	TRAJ23	TGTGCACTTTATAACCAGGGAGGAAAGCTTATCTTC	TRAC	TRBV12-3	TRBJ2-7	TGTGCCAGCAGCCAATACTGGGACAATTCCTACGAGCAGTACTTC	1	Blood	9693	FALSE	FALSE	FALSE
CAAGTTGGTATAAACG-1-P190604_Blood_2	clone_P190604:10893:1	P190604	P190604_TRAV8-4_TGTGCTGTGAGCCCCCCCACCGACAAGCTCATCTTT_TRAJ34:P190604_TRBV5-5_TGTGCCAGCAGTTACGACGGCCGCCTGAACACTGAAGCTTTCTTT_TRBJ1-1	TRAC	TRAV8-4	TRAJ34	TGTGCTGTGAGCCCCCCCACCGACAAGCTCATCTTT	TRAC	TRBV5-5	TRBJ1-1	TGTGCCAGCAGTTACGACGGCCGCCTGAACACTGAAGCTTTCTTT	1	Blood	10893	FALSE	FALSE	FALSE
CACACTCCATGGGAAC-1-P190604_Blood_2	clone_P190604:10579:1	P190604	P190604_TRAV35_TGTGCTGGGCAGCTCTTTACCCAGGGCGGATCTGAAAAGCTGGTCTTT_TRAJ57:P190604_TRBV13_TGTGCCAGCAGCCCCGGCCCGGGGACGCAGTATTTT_TRBJ2-3	TRAC	TRAV35	TRAJ57	TGTGCTGGGCAGCTCTTTACCCAGGGCGGATCTGAAAAGCTGGTCTTT	TRAC	TRBV13	TRBJ2-3	TGTGCCAGCAGCCCCGGCCCGGGGACGCAGTATTTT	1	Blood	10579	FALSE	FALSE	FALSE
CACACTCTCCTCGCAT-1-P190604_Blood_2	clone_P190604:10429:1	P190604	P190604_TRAV29/DV5_TGTGCAGCAAGCGCGAGGTCTGGGGCTGGGAGTTACCAACTCACTTTC_TRAJ28:P190604_TRBV6-6_TGTGCCAGCGCCACTAACTCCTACGAGCAGTACTTC_TRBJ2-7	TRAC	TRAV29/DV5	TRAJ28	TGTGCAGCAAGCGCGAGGTCTGGGGCTGGGAGTTACCAACTCACTTTC	TRAC	TRBV6-6	TRBJ2-7	TGTGCCAGCGCCACTAACTCCTACGAGCAGTACTTC	1	Blood	10429	FALSE	FALSE	FALSE
CACAGGCCAACGATCT-1-P190604_Blood_2	clone_P190604:10421:60	P190604	P190604_TRAV29/DV5_TGTGCAGCAAGCGCCCATAGTGGAGGTAGCAACTATAAACTGACATTT_TRAJ53:P190604_TRBV7-9_TGTGCCACCAGATTAGGGTACGAGCAGTACTTC_TRBJ2-7	TRAC	TRAV29/DV5	TRAJ53	TGTGCAGCAAGCGCCCATAGTGGAGGTAGCAACTATAAACTGACATTT	TRAC	TRBV7-9	TRBJ2-7	TGTGCCACCAGATTAGGGTACGAGCAGTACTTC	60	Blood	10421	TRUE	FALSE	FALSE
CACAGGCGTCTCGTTC-1-P190604_Blood_2	clone_P190604:10115:29	P190604	P190604_TRAV21_TGTGCTGCGGGGATGGATAGCAACTATCAGTTAATCTGG_TRAJ33:P190604_TRBV27_TGTGCCAGCAGTCCTCGGACAGGGACCGGCGAGCAGTACTTC_TRBJ2-7	TRAC	TRAV21	TRAJ33	TGTGCTGCGGGGATGGATAGCAACTATCAGTTAATCTGG	TRAC	TRBV27	TRBJ2-7	TGTGCCAGCAGTCCTCGGACAGGGACCGGCGAGCAGTACTTC	29	Blood	10115	TRUE	FALSE	FALSE
CACATTTGTGGTTTCA-1-P190604_Blood_2	clone_P190604:9922:1	P190604	P190604_TRAV17_TGTGCTACGGACGCGTCCATGAACAGAGATGACAAGATCATCTTT_TRAJ30:P190604_TRBV19_TGTGCCAGTAGCACAGCGGGAGGGGCGTACAATGAGCAGTTCTTC_TRBJ2-1	TRAC	TRAV17	TRAJ30	TGTGCTACGGACGCGTCCATGAACAGAGATGACAAGATCATCTTT	TRAC	TRBV19	TRBJ2-1	TGTGCCAGTAGCACAGCGGGAGGGGCGTACAATGAGCAGTTCTTC	1	Blood	9922	FALSE	FALSE	FALSE
CACCACTTCTGGTATG-1-P190604_Blood_2	clone_P190604:10421:60	P190604	P190604_TRAV29/DV5_TGTGCAGCAAGCGCCCATAGTGGAGGTAGCAACTATAAACTGACATTT_TRAJ53:P190604_TRBV7-9_TGTGCCACCAGATTAGGGTACGAGCAGTACTTC_TRBJ2-7	TRAC	TRAV29/DV5	TRAJ53	TGTGCAGCAAGCGCCCATAGTGGAGGTAGCAACTATAAACTGACATTT	TRAC	TRBV7-9	TRBJ2-7	TGTGCCACCAGATTAGGGTACGAGCAGTACTTC	60	Blood	10421	TRUE	FALSE	FALSE
CACCAGGGTCTAGTGT-1-P190604_Blood_2	clone_P190604:10897:1	P190604	P190604_TRAV8-4_TGTGCTGTGAGCTTATCTGGGGCTGGGAGTTACCAACTCACTTTC_TRAJ28:P190604_TRBV5-1_TGCGCCAGCAGCTTGGAAATCGGGACAGGGGGCGGTGAAGCTTTCTTT_TRBJ1-1	TRAC	TRAV8-4	TRAJ28	TGTGCTGTGAGCTTATCTGGGGCTGGGAGTTACCAACTCACTTTC	TRAC	TRBV5-1	TRBJ1-1	TGCGCCAGCAGCTTGGAAATCGGGACAGGGGGCGGTGAAGCTTTCTTT	1	Blood	10897	FALSE	FALSE	FALSE
CACCTTGTCATTGCCC-1-P190604_Blood_2	clone_P190604:10115:29	P190604	P190604_TRAV21_TGTGCTGCGGGGATGGATAGCAACTATCAGTTAATCTGG_TRAJ33:P190604_TRBV27_TGTGCCAGCAGTCCTCGGACAGGGACCGGCGAGCAGTACTTC_TRBJ2-7	TRAC	TRAV21	TRAJ33	TGTGCTGCGGGGATGGATAGCAACTATCAGTTAATCTGG	TRAC	TRBV27	TRBJ2-7	TGTGCCAGCAGTCCTCGGACAGGGACCGGCGAGCAGTACTTC	29	Blood	10115	TRUE	FALSE	FALSE
CACCTTGTCGTGGTCG-1-P190604_Blood_2	clone_P190604:9353:1	P190604	P190604_TRAV1-2_TGTGCTGTGAAAGTACTCACGGGAGGAGGAAACAAACTCACCTTT_TRAJ10:P190604_TRBV20-1_TGCAGTGCTAGAGCCCAGGGACAGGGGGCCTACGAGCAGTACTTC_TRBJ2-7	TRAC	TRAV1-2	TRAJ10	TGTGCTGTGAAAGTACTCACGGGAGGAGGAAACAAACTCACCTTT	TRAC	TRBV20-1	TRBJ2-7	TGCAGTGCTAGAGCCCAGGGACAGGGGGCCTACGAGCAGTACTTC	1	Blood	9353	FALSE	FALSE	FALSE
CACTCCATCCCATTTA-1-P190604_Blood_2	clone_P190604:10990:1	P190604	P190604_TRAV9-2_TGTGCTCTGAGCCCCGGGTACAGCAGTGCTTCCAAGATAATCTTT_TRAJ3:P190604_TRBV27_TGTGCCAGCAGCAGGGACCCCTTTGACACTAATGAAAAACTGTTTTTT_TRBJ1-4	TRAC	TRAV9-2	TRAJ3	TGTGCTCTGAGCCCCGGGTACAGCAGTGCTTCCAAGATAATCTTT	TRAC	TRBV27	TRBJ1-4	TGTGCCAGCAGCAGGGACCCCTTTGACACTAATGAAAAACTGTTTTTT	1	Blood	10990	FALSE	FALSE	FALSE
CAGAATCAGAAGGCCT-1-P190604_Blood_2	clone_P190604:10727:1	P190604	P190604_TRAV5_TGTGCAGAGAATCATAATGACATGCGCTTT_TRAJ43:P190604_TRBV7-9_TGTGCCAGCAGCGGGGGGGGGGCTGGAGAGCAGTACTTC_TRBJ2-7	TRAC	TRAV5	TRAJ43	TGTGCAGAGAATCATAATGACATGCGCTTT	TRAC	TRBV7-9	TRBJ2-7	TGTGCCAGCAGCGGGGGGGGGGCTGGAGAGCAGTACTTC	1	Blood	10727	FALSE	FALSE	FALSE
CAGAGAGCACCAGTTA-1-P190604_Blood_2	clone_P190604:9512:1	P190604	P190604_TRAV12-1_TGTGTGGTGAACAAGAACTCAGGAACCTACAAATACATCTTT_TRAJ40:P190604_TRBV7-9_TGTGCCACCAGATTAGGGTACGAGCAGTACTTC_TRBJ2-7	TRAC	TRAV12-1	TRAJ40	TGTGTGGTGAACAAGAACTCAGGAACCTACAAATACATCTTT	TRAC	TRBV7-9	TRBJ2-7	TGTGCCACCAGATTAGGGTACGAGCAGTACTTC	1	Blood	9512	FALSE	FALSE	FALSE
CAGAGAGGTAAACCTC-1-P190604_Blood_2	clone_P190604:10559:1	P190604	P190604_TRAV30_TGCGGCACAGGATCTAGCAACACAGGCAAACTAATCTTT_TRAJ37:P190604_TRBV18_TGTGCCAGCTCACCGCCCTCGGGACAGGGGGCCTACAATGAGCAGTTCTTC_TRBJ2-1	TRAC	TRAV30	TRAJ37	TGCGGCACAGGATCTAGCAACACAGGCAAACTAATCTTT	TRAC	TRBV18	TRBJ2-1	TGTGCCAGCTCACCGCCCTCGGGACAGGGGGCCTACAATGAGCAGTTCTTC	1	Blood	10559	FALSE	FALSE	FALSE
CAGATCATCTCGCATC-1-P190604_Blood_2	clone_P190604:10618:1	P190604	P190604_TRAV38-1_TGTGCTTTCCGGGGTCAGGGCGGATCTGAAAAGCTGGTCTTT_TRAJ57:P190604_TRBV20-1_TGCAGTGCTTTCTCCTACGAGCAGTACTTC_TRBJ2-7	TRAC	TRAV38-1	TRAJ57	TGTGCTTTCCGGGGTCAGGGCGGATCTGAAAAGCTGGTCTTT	TRAC	TRBV20-1	TRBJ2-7	TGCAGTGCTTTCTCCTACGAGCAGTACTTC	1	Blood	10618	FALSE	FALSE	FALSE
CAGCAGCTCAGCTGGC-1-P190604_Blood_2	clone_P190604:9903:1	P190604	P190604_TRAV17_TGTGCTACGGACCCTTTTTATAACCAGGGAGGAAAGCTTATCTTC_TRAJ23:P190604_TRBV14_TGTGCCAGCAGCCCCGTCGGGGGCTACGAGCAGTACTTC_TRBJ2-7	TRAC	TRAV17	TRAJ23	TGTGCTACGGACCCTTTTTATAACCAGGGAGGAAAGCTTATCTTC	TRAC	TRBV14	TRBJ2-7	TGTGCCAGCAGCCCCGTCGGGGGCTACGAGCAGTACTTC	1	Blood	9903	FALSE	FALSE	FALSE
CAGCCGACAGGATTGG-1-P190604_Blood_2	clone_P190604:9899:2	P190604	P190604_TRAV17_TGTGCTACGGAATCTAACTTTGGAAATGAGAAATTAACCTTT_TRAJ48:P190604_TRBV15_TGTGCCACCAGCAAACTAGCGGGAGAGGAGCAGTACTTC_TRBJ2-7	TRAC	TRAV17	TRAJ48	TGTGCTACGGAATCTAACTTTGGAAATGAGAAATTAACCTTT	TRAC	TRBV15	TRBJ2-7	TGTGCCACCAGCAAACTAGCGGGAGAGGAGCAGTACTTC	2	Blood	9899	TRUE	FALSE	FALSE
CAGCGACGTGAACCTT-1-P190604_Blood_2	clone_P190604:9787:1	P190604	P190604_TRAV13-2_TGTGCAGAGACCCCGAATTCAGGAAACACACCTCTTGTCTTT_TRAJ29:P190604_TRBV9_TGTGCCAGCAGCCAAAGCGGGAGGGCCGTCGCCTACGAGCAGTACTTC_TRBJ2-7	TRAC	TRAV13-2	TRAJ29	TGTGCAGAGACCCCGAATTCAGGAAACACACCTCTTGTCTTT	TRAC	TRBV9	TRBJ2-7	TGTGCCAGCAGCCAAAGCGGGAGGGCCGTCGCCTACGAGCAGTACTTC	1	Blood	9787	FALSE	FALSE	FALSE
CAGCTAACAAGCCGTC-1-P190604_Blood_2	clone_P190604:10914:1	P190604	P190604_TRAV8-4_TGTGCTGTGAGTGATAATGCAGGCAACATGCTCACCTTT_TRAJ39:P190604_TRBV28_TGTGCCAGCAGTTCGCCATCAGCCCTTAACTATGGCTACACCTTC_TRBJ1-2	TRAC	TRAV8-4	TRAJ39	TGTGCTGTGAGTGATAATGCAGGCAACATGCTCACCTTT	TRAC	TRBV28	TRBJ1-2	TGTGCCAGCAGTTCGCCATCAGCCCTTAACTATGGCTACACCTTC	1	Blood	10914	FALSE	FALSE	FALSE
CAGTAACCATTAGCCA-1-P190604_Blood_2	clone_P190604:9804:1	P190604	P190604_TRAV13-2_TGTGCAGAGGGCTCCACCGGTAACCAGTTCTATTTT_TRAJ49:P190604_TRBV3-1_TGTGCCAGCAGCCAAGAGGGGGGACGGATCGGGAATCAGCCCCAGCATTTT_TRBJ1-5	TRAC	TRAV13-2	TRAJ49	TGTGCAGAGGGCTCCACCGGTAACCAGTTCTATTTT	TRAC	TRBV3-1	TRBJ1-5	TGTGCCAGCAGCCAAGAGGGGGGACGGATCGGGAATCAGCCCCAGCATTTT	1	Blood	9804	FALSE	FALSE	FALSE
CAGTAACGTCAACATC-1-P190604_Blood_2	clone_P190604:10163:12	P190604	P190604_TRAV21_TGTGCTGTGGAGGATAGCAACTATCAGTTAATCTGG_TRAJ33:P190604_TRBV5-1_TGCGCCAGCCGAGATACCATCGGGACAGACGACTATGGCTACACCTTC_TRBJ1-2	TRAC	TRAV21	TRAJ33	TGTGCTGTGGAGGATAGCAACTATCAGTTAATCTGG	TRAC	TRBV5-1	TRBJ1-2	TGCGCCAGCCGAGATACCATCGGGACAGACGACTATGGCTACACCTTC	12	Blood	10163	TRUE	FALSE	FALSE
CAGTCCTTCCGCATCT-1-P190604_Blood_2	clone_P190604:9611:6	P190604	P190604_TRAV12-2_TGTGCCGTGAACGGGGCTTCTGGTTCTGCAAGGCAACTGACCTTT_TRAJ22:P190604_TRBV6-1_TGTGCCAGCACCGGGACAGGGCTTAACGAGCAGTACTTC_TRBJ2-7	TRAC	TRAV12-2	TRAJ22	TGTGCCGTGAACGGGGCTTCTGGTTCTGCAAGGCAACTGACCTTT	TRAC	TRBV6-1	TRBJ2-7	TGTGCCAGCACCGGGACAGGGCTTAACGAGCAGTACTTC	6	Blood	9611	TRUE	FALSE	FALSE
CATATGGAGACGCAAC-1-P190604_Blood_2	clone_P190604:10421:60	P190604	P190604_TRAV29/DV5_TGTGCAGCAAGCGCCCATAGTGGAGGTAGCAACTATAAACTGACATTT_TRAJ53:P190604_TRBV7-9_TGTGCCACCAGATTAGGGTACGAGCAGTACTTC_TRBJ2-7	TRAC	TRAV29/DV5	TRAJ53	TGTGCAGCAAGCGCCCATAGTGGAGGTAGCAACTATAAACTGACATTT	TRAC	TRBV7-9	TRBJ2-7	TGTGCCACCAGATTAGGGTACGAGCAGTACTTC	60	Blood	10421	TRUE	FALSE	FALSE
CATCAAGAGGTAGCTG-1-P190604_Blood_2	clone_P190604:10470:1	P190604	P190604_TRAV29/DV5_TGTGCAGCTATCACTAGTGGAGGTAGCAACTATAAACTGACATTT_TRAJ53:P190604_TRBV11-2_TGTGCCAGCAGCTTAGATTTTGGAAACCGGAACGAGCAGTACTTC_TRBJ2-7	TRAC	TRAV29/DV5	TRAJ53	TGTGCAGCTATCACTAGTGGAGGTAGCAACTATAAACTGACATTT	TRAC	TRBV11-2	TRBJ2-7	TGTGCCAGCAGCTTAGATTTTGGAAACCGGAACGAGCAGTACTTC	1	Blood	10470	FALSE	FALSE	FALSE
CATCAAGCACACTGCG-1-P190604_Blood_2	clone_P190604:9648:5	P190604	P190604_TRAV12-2_TGTGCCGTTTATTCAGGAGGAGGTGCTGACGGACTCACCTTT_TRAJ45:P190604_TRBV11-2_TGTGCCAGCAGCTTGATGGAGAACTACAATGAGCAGTTCTTC_TRBJ2-1	TRAC	TRAV12-2	TRAJ45	TGTGCCGTTTATTCAGGAGGAGGTGCTGACGGACTCACCTTT	TRAC	TRBV11-2	TRBJ2-1	TGTGCCAGCAGCTTGATGGAGAACTACAATGAGCAGTTCTTC	5	Blood	9648	TRUE	FALSE	FALSE
CATCAAGCAGCTCGAC-1-P190604_Blood_2	clone_P190604:10317:1	P190604	P190604_TRAV26-1_TGCATCGTCAGAGTCGGGGACAAGATCATCTTT_TRAJ30:P190604_TRBV20-1_TGCAGTGCTAGAGTTGTGGGGGAGGGAGAAAAACTGTTTTTT_TRBJ1-4	TRAC	TRAV26-1	TRAJ30	TGCATCGTCAGAGTCGGGGACAAGATCATCTTT	TRAC	TRBV20-1	TRBJ1-4	TGCAGTGCTAGAGTTGTGGGGGAGGGAGAAAAACTGTTTTTT	1	Blood	10317	FALSE	FALSE	FALSE
CATCAGATCGCCAGCA-1-P190604_Blood_2	clone_P190604:10243:1	P190604	P190604_TRAV24_TGTGCCCGTCTGTATTCAGGAGGAGGTGCTGACGGACTCACCTTT_TRAJ45:P190604_TRBV27_TGTGCCAGCAGTTTATCGACAGGGTGGGCTGAAGCTTTCTTT_TRBJ1-1	TRAC	TRAV24	TRAJ45	TGTGCCCGTCTGTATTCAGGAGGAGGTGCTGACGGACTCACCTTT	TRAC	TRBV27	TRBJ1-1	TGTGCCAGCAGTTTATCGACAGGGTGGGCTGAAGCTTTCTTT	1	Blood	10243	FALSE	FALSE	FALSE
CATCCACTCCGTTGCT-1-P190604_Blood_2	clone_P190604:9915:8	P190604	P190604_TRAV17_TGTGCTACGGACGCCTTATCAGGAACCTACAAATACATCTTT_TRAJ40:P190604_TRBV13_TGTGCCAGCAGCTTAGGGCCCCCACTAGCGGGACAATACGAGCAGTACTTC_TRBJ2-7	TRAC	TRAV17	TRAJ40	TGTGCTACGGACGCCTTATCAGGAACCTACAAATACATCTTT	TRAC	TRBV13	TRBJ2-7	TGTGCCAGCAGCTTAGGGCCCCCACTAGCGGGACAATACGAGCAGTACTTC	8	Blood	9915	TRUE	FALSE	FALSE
CATGCCTGTACCTACA-1-P190604_Blood_2	clone_P190604:10299:2	P190604	P190604_TRAV26-1_TGCATCGTCAGACTTAACAATGCCAGACTCATGTTT_TRAJ31:P190604_TRBV20-1_TGCAGTGCTAGAGAGGACAGGGGGAATTCACCCCTCCACTTT_TRBJ1-6	TRAC	TRAV26-1	TRAJ31	TGCATCGTCAGACTTAACAATGCCAGACTCATGTTT	TRAC	TRBV20-1	TRBJ1-6	TGCAGTGCTAGAGAGGACAGGGGGAATTCACCCCTCCACTTT	2	Blood	10299	TRUE	FALSE	FALSE
CATGCCTGTGTGGCTC-1-P190604_Blood_2	clone_P190604:9666:1	P190604	P190604_TRAV12-3_TGTGCAATGAGCGCAGGACAGGGAGCCCAGAAGCTGGTATTT_TRAJ54:P190604_TRBV11-2_TGTGCCAGCAGCTTAGTGGCAGGCGGGACTAGCGGGGGGGGCCAGTACTTC_TRBJ2-5	TRAC	TRAV12-3	TRAJ54	TGTGCAATGAGCGCAGGACAGGGAGCCCAGAAGCTGGTATTT	TRAC	TRBV11-2	TRBJ2-5	TGTGCCAGCAGCTTAGTGGCAGGCGGGACTAGCGGGGGGGGCCAGTACTTC	1	Blood	9666	FALSE	FALSE	FALSE
CATGCCTTCCCACTTG-1-P190604_Blood_2	clone_P190604:10846:1	P190604	P190604_TRAV8-3_TGTGCTGTGGGTCAGAATTCAGGTGGAGGAAGCTACATACCTACATTT_TRAJ6:P190604_TRBV6-6_TGTGCCAGCAGTTACTCAGGCACCTACGAGCAGTACTTC_TRBJ2-7	TRAC	TRAV8-3	TRAJ6	TGTGCTGTGGGTCAGAATTCAGGTGGAGGAAGCTACATACCTACATTT	TRAC	TRBV6-6	TRBJ2-7	TGTGCCAGCAGTTACTCAGGCACCTACGAGCAGTACTTC	1	Blood	10846	FALSE	FALSE	FALSE
CATGGCGCAGACACTT-1-P190604_Blood_2	clone_P190604:10763:1	P190604	P190604_TRAV6_TGTGCTCTAGACAGGACTGGAGGCTTCAAAACTATCTTT_TRAJ9:P190604_TRBV18_TGTGCCAGCTCACTAGGGACTAGCGGAGCTAGCACAGATACGCAGTATTTT_TRBJ2-3	TRAC	TRAV6	TRAJ9	TGTGCTCTAGACAGGACTGGAGGCTTCAAAACTATCTTT	TRAC	TRBV18	TRBJ2-3	TGTGCCAGCTCACTAGGGACTAGCGGAGCTAGCACAGATACGCAGTATTTT	1	Blood	10763	FALSE	FALSE	FALSE
CATGGCGTCACGATGT-1-P190604_Blood_2	clone_P190604:10287:1	P190604	P190604_TRAV25_TGTTTACGGACAACTGACAGCTGGGGGAAATTCCAGTTT_TRAJ24:P190604_TRBV11-1_TGTGCCAGCAGCTTCCCCGATTCTAGCAGCGAGCAGTTCTTC_TRBJ2-1	TRAC	TRAV25	TRAJ24	TGTTTACGGACAACTGACAGCTGGGGGAAATTCCAGTTT	TRAC	TRBV11-1	TRBJ2-1	TGTGCCAGCAGCTTCCCCGATTCTAGCAGCGAGCAGTTCTTC	1	Blood	10287	FALSE	FALSE	FALSE
CATGGCGTCCTCCTAG-1-P190604_Blood_2	clone_P190604:9915:8	P190604	P190604_TRAV17_TGTGCTACGGACGCCTTATCAGGAACCTACAAATACATCTTT_TRAJ40:P190604_TRBV13_TGTGCCAGCAGCTTAGGGCCCCCACTAGCGGGACAATACGAGCAGTACTTC_TRBJ2-7	TRAC	TRAV17	TRAJ40	TGTGCTACGGACGCCTTATCAGGAACCTACAAATACATCTTT	TRAC	TRBV13	TRBJ2-7	TGTGCCAGCAGCTTAGGGCCCCCACTAGCGGGACAATACGAGCAGTACTTC	8	Blood	9915	TRUE	FALSE	FALSE
CATGGCGTCCTCGCAT-1-P190604_Blood_2	clone_P190604:10752:1	P190604	P190604_TRAV5_TGTGCAGAGATTCCGGGCTCAGGAACCTACAAATACATCTTT_TRAJ40:P190604_TRBV20-1_TGCAGTGCTAGAGTTGCGACAGGGGGCGGGATGGCTGAAGCTTTCTTT_TRBJ1-1	TRAC	TRAV5	TRAJ40	TGTGCAGAGATTCCGGGCTCAGGAACCTACAAATACATCTTT	TRAC	TRBV20-1	TRBJ1-1	TGCAGTGCTAGAGTTGCGACAGGGGGCGGGATGGCTGAAGCTTTCTTT	1	Blood	10752	FALSE	FALSE	FALSE
CATTCGCGTACGCTGC-1-P190604_Blood_2	clone_P190604:10079:1	P190604	P190604_TRAV20_TGTGCTGTGCAGGCACACAACTTCAACAAATTTTACTTT_TRAJ21:P190604_TRBV6-1_TGTGCCAGCACTCCCGGGACTAGCGTCAACGAGCAGTACTTC_TRBJ2-7	TRAC	TRAV20	TRAJ21	TGTGCTGTGCAGGCACACAACTTCAACAAATTTTACTTT	TRAC	TRBV6-1	TRBJ2-7	TGTGCCAGCACTCCCGGGACTAGCGTCAACGAGCAGTACTTC	1	Blood	10079	FALSE	FALSE	FALSE
CATTCGCGTAGGGTAC-1-P190604_Blood_2	clone_P190604:9485:1	P190604	P190604_TRAV1-2_TGTGGGGGTAACGACTACAAGCTCAGCTTT_TRAJ20:P190604_TRBV6-1_TGTGCCAGCAGTGAAGCGGGGGATAGGGCCTACGAGCAGTACTTC_TRBJ2-7	TRAC	TRAV1-2	TRAJ20	TGTGGGGGTAACGACTACAAGCTCAGCTTT	TRAC	TRBV6-1	TRBJ2-7	TGTGCCAGCAGTGAAGCGGGGGATAGGGCCTACGAGCAGTACTTC	1	Blood	9485	FALSE	TRUE	FALSE
CCAATCCGTACTTAGC-1-P190604_Blood_2	clone_P190604:9746:1	P190604	P190604_TRAV13-1_TGTGCAGCAAGTTTAGTTAACGACTACAAGCTCAGCTTT_TRAJ20:P190604_TRBV3-1_TGTGCCAGCAGCCAAGAGGGAAAGCAATACCGGGAGACCCAGTACTTC_TRBJ2-5	TRAC	TRAV13-1	TRAJ20	TGTGCAGCAAGTTTAGTTAACGACTACAAGCTCAGCTTT	TRAC	TRBV3-1	TRBJ2-5	TGTGCCAGCAGCCAAGAGGGAAAGCAATACCGGGAGACCCAGTACTTC	1	Blood	9746	FALSE	FALSE	FALSE
CCAATCCGTTGGTGGA-1-P190604_Blood_2	clone_P190604:10865:2	P190604	P190604_TRAV8-3_TGTGCTGTGGGTGGTCTTAGGAGTACTAGCTATGGAAAGCTGACATTT_TRAJ52:P190604_TRBV24-1_TGTGCCACCAGTGACGGGGGTGCGGGAGTTGGCACAGATACGCAGTATTTT_TRBJ2-3	TRAC	TRAV8-3	TRAJ52	TGTGCTGTGGGTGGTCTTAGGAGTACTAGCTATGGAAAGCTGACATTT	TRAC	TRBV24-1	TRBJ2-3	TGTGCCACCAGTGACGGGGGTGCGGGAGTTGGCACAGATACGCAGTATTTT	2	Blood	10865	TRUE	FALSE	FALSE
CCAATCCTCAAGGCTT-1-P190604_Blood_2	clone_P190604:10754:1	P190604	P190604_TRAV5_TGTGCAGAGGGCAAGAGCTTTCAGAAACTTGTATTT_TRAJ8:P190604_TRBV20-1_TGCAGTGCCAAAGCTGACAGACTTAATGAAAAACTGTTTTTT_TRBJ1-4	TRAC	TRAV5	TRAJ8	TGTGCAGAGGGCAAGAGCTTTCAGAAACTTGTATTT	TRAC	TRBV20-1	TRBJ1-4	TGCAGTGCCAAAGCTGACAGACTTAATGAAAAACTGTTTTTT	1	Blood	10754	FALSE	FALSE	FALSE
CCGGTAGCACATGTGT-1-P190604_Blood_2	clone_P190604:9783:1	P190604	P190604_TRAV13-2_TGTGCAGAGACACTTAACGACTACAAGCTCAGCTTT_TRAJ20:P190604_TRBV28_TGTGCCAGCAGTTCGGGACAGGCCCCTAATGAAAAACTGTTTTTT_TRBJ1-4	TRAC	TRAV13-2	TRAJ20	TGTGCAGAGACACTTAACGACTACAAGCTCAGCTTT	TRAC	TRBV28	TRBJ1-4	TGTGCCAGCAGTTCGGGACAGGCCCCTAATGAAAAACTGTTTTTT	1	Blood	9783	FALSE	FALSE	FALSE
CCGGTAGTCGCGATCG-1-P190604_Blood_2	clone_P190604:10332:1	P190604	P190604_TRAV26-1_TGCATCGTCGCCTCAAATTCCGGGTATGCACTCAACTTC_TRAJ41:P190604_TRBV5-1_TGCGCCAGCAGCTTGGGGACAGGGAGATATGAAAAACTGTTTTTT_TRBJ1-4	TRAC	TRAV26-1	TRAJ41	TGCATCGTCGCCTCAAATTCCGGGTATGCACTCAACTTC	TRAC	TRBV5-1	TRBJ1-4	TGCGCCAGCAGCTTGGGGACAGGGAGATATGAAAAACTGTTTTTT	1	Blood	10332	FALSE	FALSE	FALSE
CCGTGGATCACTCTTA-1-P190604_Blood_2	clone_P190604:10999:1	P190604	P190604_TRAV9-2_TGTGCTCTGAGTCCACTTTCTGGTTCTGCAAGGCAACTGACCTTT_TRAJ22:P190604_TRBV20-1_TGCAGCGTTGAGCGGGAGCCCAACCCCAACGAGCAGTACTTC_TRBJ2-7	TRAC	TRAV9-2	TRAJ22	TGTGCTCTGAGTCCACTTTCTGGTTCTGCAAGGCAACTGACCTTT	TRAC	TRBV20-1	TRBJ2-7	TGCAGCGTTGAGCGGGAGCCCAACCCCAACGAGCAGTACTTC	1	Blood	10999	FALSE	FALSE	FALSE
CCGTTCAGTTGAGTTC-1-P190604_Blood_2	clone_P190604:10853:1	P190604	P190604_TRAV8-3_TGTGCTGTGGGTGCATGGGGAGGCTTCAAAACTATCTTT_TRAJ9:P190604_TRBV29-1_TGCAGTTCACATGAAGAGGGGTTGGCTTTCTTT_TRBJ1-1	TRAC	TRAV8-3	TRAJ9	TGTGCTGTGGGTGCATGGGGAGGCTTCAAAACTATCTTT	TRAC	TRBV29-1	TRBJ1-1	TGCAGTTCACATGAAGAGGGGTTGGCTTTCTTT	1	Blood	10853	FALSE	FALSE	FALSE
CCGTTCATCTGTCTAT-1-P190604_Blood_2	clone_P190604:9521:1	P190604	P190604_TRAV12-1_TGTGTGGTGAACATCGGAGGTAGCAACTATAAACTGACATTT_TRAJ53:P190604_TRBV18_TGTGCCAGCTCACCTCGGACAGCCGATAATTCACCCCTCCACTTT_TRBJ1-6	TRAC	TRAV12-1	TRAJ53	TGTGTGGTGAACATCGGAGGTAGCAACTATAAACTGACATTT	TRAC	TRBV18	TRBJ1-6	TGTGCCAGCTCACCTCGGACAGCCGATAATTCACCCCTCCACTTT	1	Blood	9521	FALSE	FALSE	FALSE
CCTACACTCCTGTAGA-1-P190604_Blood_2	clone_P190604:10087:1	P190604	P190604_TRAV20_TGTGCTGTGCAGGCGGTAGGCTCTAGCAACACAGGCAAACTAATCTTT_TRAJ37:P190604_TRBV7-9_TGTGCCAGCAGCTTAGTACCCGGACAGGGGGAAAATGGCTACACCTTC_TRBJ1-2	TRAC	TRAV20	TRAJ37	TGTGCTGTGCAGGCGGTAGGCTCTAGCAACACAGGCAAACTAATCTTT	TRAC	TRBV7-9	TRBJ1-2	TGTGCCAGCAGCTTAGTACCCGGACAGGGGGAAAATGGCTACACCTTC	1	Blood	10087	FALSE	FALSE	FALSE
CCTACCATCGCCTGTT-1-P190604_Blood_2	clone_P190604:10741:1	P190604	P190604_TRAV5_TGTGCAGAGAGTAGATATGGAGGAAGCCAAGGAAATCTCATCTTT_TRAJ42:P190604_TRBV5-6_TGTGCCAGCAGCTCGAGACAGGGGATATCCTACGAGCAGTACTTC_TRBJ2-7	TRAC	TRAV5	TRAJ42	TGTGCAGAGAGTAGATATGGAGGAAGCCAAGGAAATCTCATCTTT	TRAC	TRBV5-6	TRBJ2-7	TGTGCCAGCAGCTCGAGACAGGGGATATCCTACGAGCAGTACTTC	1	Blood	10741	FALSE	FALSE	FALSE
CCTATTACAGCTCCGA-1-P190604_Blood_2	clone_P190604:10225:1	P190604	P190604_TRAV23/DV6_TGTGCAGCAAGTCGATTCGGGAAACTTGTATTT_TRAJ8:P190604_TRBV20-1_TGCAGTGCGCCACCGGCCCACCAAGAGACCCAGTACTTC_TRBJ2-5	TRAC	TRAV23/DV6	TRAJ8	TGTGCAGCAAGTCGATTCGGGAAACTTGTATTT	TRAC	TRBV20-1	TRBJ2-5	TGCAGTGCGCCACCGGCCCACCAAGAGACCCAGTACTTC	1	Blood	10225	FALSE	FALSE	FALSE
CCTATTATCTCATTCA-1-P190604_Blood_2	clone_P190604:10666:1	P190604	P190604_TRAV4_TGCCTCGTGGACACGGGCAGGAGAGCACTTACTTTT_TRAJ5:P190604_TRBV5-6_TGTGCCAGCGGCTTGACTAGCGGACTCACAGATACGCAGTATTTT_TRBJ2-3	TRAC	TRAV4	TRAJ5	TGCCTCGTGGACACGGGCAGGAGAGCACTTACTTTT	TRAC	TRBV5-6	TRBJ2-3	TGTGCCAGCGGCTTGACTAGCGGACTCACAGATACGCAGTATTTT	1	Blood	10666	FALSE	FALSE	FALSE
CCTCAGTCAACGATGG-1-P190604_Blood_2	clone_P190604:9670:10	P190604	P190604_TRAV12-3_TGTGCAATGAGCGCGGGTAGCAACTATCAGTTAATCTGG_TRAJ33:P190604_TRBV7-9_TGTGCCAGCAGCACGTCCGCCGACAGCCACACTGAAGCTTTCTTT_TRBJ1-1	TRAC	TRAV12-3	TRAJ33	TGTGCAATGAGCGCGGGTAGCAACTATCAGTTAATCTGG	TRAC	TRBV7-9	TRBJ1-1	TGTGCCAGCAGCACGTCCGCCGACAGCCACACTGAAGCTTTCTTT	10	Blood	9670	TRUE	FALSE	FALSE
CCTCAGTTCTGTACGA-1-P190604_Blood_2	clone_P190604:10984:1	P190604	P190604_TRAV9-2_TGTGCTCTGAGACACACCGGTAACCAGTTCTATTTT_TRAJ49:P190604_TRBV20-1_TGCAGTGCTAGCGGGGGGGGGAGTTTAGGCAATCAGCCCCAGCATTTT_TRBJ1-5	TRAC	TRAV9-2	TRAJ49	TGTGCTCTGAGACACACCGGTAACCAGTTCTATTTT	TRAC	TRBV20-1	TRBJ1-5	TGCAGTGCTAGCGGGGGGGGGAGTTTAGGCAATCAGCCCCAGCATTTT	1	Blood	10984	FALSE	FALSE	FALSE
CCTCTGACAGTATCTG-1-P190604_Blood_2	clone_P190604:9904:1	P190604	P190604_TRAV17_TGTGCTACGGACCTAAATAACTATGGTCAGAATTTTGTCTTT_TRAJ26:P190604_TRBV20-1_TGCAGTGCTCAACAGAGCGGGAGGGCCAGGGTACAAGAGACCCAGTACTTC_TRBJ2-5	TRAC	TRAV17	TRAJ26	TGTGCTACGGACCTAAATAACTATGGTCAGAATTTTGTCTTT	TRAC	TRBV20-1	TRBJ2-5	TGCAGTGCTCAACAGAGCGGGAGGGCCAGGGTACAAGAGACCCAGTACTTC	1	Blood	9904	FALSE	FALSE	FALSE
CCTCTGAGTGTAACGG-1-P190604_Blood_2	clone_P190604:10101:1	P190604	P190604_TRAV20_TGTGCTGTGGATGCAACCGGTAACCAGTTCTATTTT_TRAJ49:P190604_TRBV30_TGTGCCTGGAACGGGTACAATGAGCAGTTCTTC_TRBJ2-1	TRAC	TRAV20	TRAJ49	TGTGCTGTGGATGCAACCGGTAACCAGTTCTATTTT	TRAC	TRBV30	TRBJ2-1	TGTGCCTGGAACGGGTACAATGAGCAGTTCTTC	1	Blood	10101	FALSE	FALSE	FALSE
CCTTCCCTCACTGGGC-1-P190604_Blood_2	clone_P190604:9571:1	P190604	P190604_TRAV12-2_TGTGCCGCCGTCTCAGGAACCTACAAATACATCTTT_TRAJ40:P190604_TRBV5-1_TGCGCCAGCAGCTTGGGGGCGGGATGGGACGAGCAGTACTTC_TRBJ2-7	TRAC	TRAV12-2	TRAJ40	TGTGCCGCCGTCTCAGGAACCTACAAATACATCTTT	TRAC	TRBV5-1	TRBJ2-7	TGCGCCAGCAGCTTGGGGGCGGGATGGGACGAGCAGTACTTC	1	Blood	9571	FALSE	FALSE	FALSE
CCTTTCTAGACGACGT-1-P190604_Blood_2	clone_P190604:10513:1	P190604	P190604_TRAV3_TGTGCTGTGAGAGACGCATACAGAGATGACAAGATCATCTTT_TRAJ30:P190604_TRBV6-1_TGTGCCAGTAGCTTCGACAGGGGGAACACTGAAGCTTTCTTT_TRBJ1-1	TRAC	TRAV3	TRAJ30	TGTGCTGTGAGAGACGCATACAGAGATGACAAGATCATCTTT	TRAC	TRBV6-1	TRBJ1-1	TGTGCCAGTAGCTTCGACAGGGGGAACACTGAAGCTTTCTTT	1	Blood	10513	FALSE	FALSE	FALSE
CCTTTCTAGTCTCGGC-1-P190604_Blood_2	clone_P190604:9759:5	P190604	P190604_TRAV13-1_TGTGCAGCTTCTCTCCGTGGTGGTACTAGCTATGGAAAGCTGACATTT_TRAJ52:P190604_TRBV20-1_TGCAGTGCTAGGTCAGGATATTTCGGGGAGCTGTTTTTT_TRBJ2-2	TRAC	TRAV13-1	TRAJ52	TGTGCAGCTTCTCTCCGTGGTGGTACTAGCTATGGAAAGCTGACATTT	TRAC	TRBV20-1	TRBJ2-2	TGCAGTGCTAGGTCAGGATATTTCGGGGAGCTGTTTTTT	5	Blood	9759	TRUE	FALSE	FALSE
CCTTTCTGTAGTGAAT-1-P190604_Blood_2	clone_P190604:10843:1	P190604	P190604_TRAV8-3_TGTGCTGTGGGGAACCAGGCAGGAACTGCTCTGATCTTT_TRAJ15:P190604_TRBV28_TGTGCCAGCAGTGTTCCAGGGTCAGCCAAAAACATTCAGTACTTC_TRBJ2-4	TRAC	TRAV8-3	TRAJ15	TGTGCTGTGGGGAACCAGGCAGGAACTGCTCTGATCTTT	TRAC	TRBV28	TRBJ2-4	TGTGCCAGCAGTGTTCCAGGGTCAGCCAAAAACATTCAGTACTTC	1	Blood	10843	FALSE	FALSE	FALSE
CGAACATAGTCTCCTC-1-P190604_Blood_2	clone_P190604:9729:1	P190604	P190604_TRAV13-1_TGTGCAGCAAGTATGGATGGTGGCTACAATAAGCTGATTTTT_TRAJ4:P190604_TRBV15_TGTGCCACCAGCAGAGAATCAGGGATTCCCGGGGAGCTGTTTTTT_TRBJ2-2	TRAC	TRAV13-1	TRAJ4	TGTGCAGCAAGTATGGATGGTGGCTACAATAAGCTGATTTTT	TRAC	TRBV15	TRBJ2-2	TGTGCCACCAGCAGAGAATCAGGGATTCCCGGGGAGCTGTTTTTT	1	Blood	9729	FALSE	FALSE	FALSE
CGAGCACGTACAGTGG-1-P190604_Blood_2	clone_P190604:10381:1	P190604	P190604_TRAV27_TGTGCAGGAGCTATCTCTCCATACAATAACAATGACATGCGCTTT_TRAJ43:P190604_TRBV29-1_TGCAGCGCCTCTATCCTAGCCCAGCCCACAGATACGCAGTATTTT_TRBJ2-3	TRAC	TRAV27	TRAJ43	TGTGCAGGAGCTATCTCTCCATACAATAACAATGACATGCGCTTT	TRAC	TRBV29-1	TRBJ2-3	TGCAGCGCCTCTATCCTAGCCCAGCCCACAGATACGCAGTATTTT	1	Blood	10381	FALSE	FALSE	FALSE
CGAGCACGTACGCTGC-1-P190604_Blood_2	clone_P190604:11011:1	P190604	P190604_TRAV9-2_TGTGCTCTGAGTGATCACACCCCCGCGGGAGGAGGAAACAAACTCACCTTT_TRAJ10:P190604_TRBV5-8_TGTGCCAGCCATAGGGGAGAGCTGAGCTCCTACAATGAGCAGTTCTTC_TRBJ2-1	TRAC	TRAV9-2	TRAJ10	TGTGCTCTGAGTGATCACACCCCCGCGGGAGGAGGAAACAAACTCACCTTT	TRAC	TRBV5-8	TRBJ2-1	TGTGCCAGCCATAGGGGAGAGCTGAGCTCCTACAATGAGCAGTTCTTC	1	Blood	11011	FALSE	FALSE	FALSE
CGAGCACGTTGAGTTC-1-P190604_Blood_2	clone_P190604:10096:1	P190604	P190604_TRAV20_TGTGCTGTGCGGACAGGAAACACACCTCTTGTCTTT_TRAJ29:P190604_TRBV29-1_TGCAGCGACCTTCGTGGACAAGAGACCCAGTACTTC_TRBJ2-5	TRAC	TRAV20	TRAJ29	TGTGCTGTGCGGACAGGAAACACACCTCTTGTCTTT	TRAC	TRBV29-1	TRBJ2-5	TGCAGCGACCTTCGTGGACAAGAGACCCAGTACTTC	1	Blood	10096	FALSE	FALSE	FALSE
CGAGCCAGTTCCACAA-1-P190604_Blood_2	clone_P190604:10753:1	P190604	P190604_TRAV5_TGTGCAGAGCGAGATACTGGAGGCTTCAAAACTATCTTT_TRAJ9:P190604_TRBV7-2_TGTGCCAGCAGCCCACAAACAGGACAAGGGACTGAAGCTTTCTTT_TRBJ1-1	TRAC	TRAV5	TRAJ9	TGTGCAGAGCGAGATACTGGAGGCTTCAAAACTATCTTT	TRAC	TRBV7-2	TRBJ1-1	TGTGCCAGCAGCCCACAAACAGGACAAGGGACTGAAGCTTTCTTT	1	Blood	10753	FALSE	FALSE	FALSE
CGAGCCATCACAAACC-1-P190604_Blood_2	clone_P190604:9579:1	P190604	P190604_TRAV12-2_TGTGCCGTCACCGGAAATACTGGAGGCTTCAAAACTATCTTT_TRAJ9:P190604_TRBV5-4_TGTGCCAGCAGCGCCGCAGACAGGGAAAGGGAGCAGTACTTC_TRBJ2-7	TRAC	TRAV12-2	TRAJ9	TGTGCCGTCACCGGAAATACTGGAGGCTTCAAAACTATCTTT	TRAC	TRBV5-4	TRBJ2-7	TGTGCCAGCAGCGCCGCAGACAGGGAAAGGGAGCAGTACTTC	1	Blood	9579	FALSE	FALSE	FALSE
CGATCGGTCAGGCAAG-1-P190604_Blood_2	clone_P190604:10945:1	P190604	P190604_TRAV8-6_TGTGCTGTGAGTAGTGGAGGTAGCAACTATAAACTGACATTT_TRAJ53:P190604_TRBV7-9_TGTGCCAGCAGCCCACCCTTAGCGGGAGGGGGAGAGACCCAGTACTTC_TRBJ2-5	TRAC	TRAV8-6	TRAJ53	TGTGCTGTGAGTAGTGGAGGTAGCAACTATAAACTGACATTT	TRAC	TRBV7-9	TRBJ2-5	TGTGCCAGCAGCCCACCCTTAGCGGGAGGGGGAGAGACCCAGTACTTC	1	Blood	10945	FALSE	FALSE	FALSE
CGATTGAAGAGGACGG-1-P190604_Blood_2	clone_P190604:9745:1	P190604	P190604_TRAV13-1_TGTGCAGCAAGTTCCCCTAGGAGCAGTGCTTCCAAGATAATCTTT_TRAJ3:P190604_TRBV6-2_TGTGCCAGCAGTTACAACGGGGCTGGAAACACCATATATTTT_TRBJ1-3	TRAC	TRAV13-1	TRAJ3	TGTGCAGCAAGTTCCCCTAGGAGCAGTGCTTCCAAGATAATCTTT	TRAC	TRBV6-2	TRBJ1-3	TGTGCCAGCAGTTACAACGGGGCTGGAAACACCATATATTTT	1	Blood	9745	FALSE	FALSE	FALSE
CGATTGAGTATCACCA-1-P190604_Blood_2	clone_P190604:10176:1	P190604	P190604_TRAV21_TGTGCTGTGTTGGGAGGAAGCTACATACCTACATTT_TRAJ6:P190604_TRBV27_TGTGCCAGCAGTTTCGGCGCACAGGGGCGCCGTGGCTACACCTTC_TRBJ1-2	TRAC	TRAV21	TRAJ6	TGTGCTGTGTTGGGAGGAAGCTACATACCTACATTT	TRAC	TRBV27	TRBJ1-2	TGTGCCAGCAGTTTCGGCGCACAGGGGCGCCGTGGCTACACCTTC	1	Blood	10176	FALSE	FALSE	FALSE
CGCGGTAAGCGTGTCC-1-P190604_Blood_2	clone_P190604:10571:1	P190604	P190604_TRAV35_TGTGCTGGCCCCCCGATCAATAATGCAGGCAACATGCTCACCTTT_TRAJ39:P190604_TRBV9_TGTGCCAGCAGCGGAACTAGCACAGATACGCAGTATTTT_TRBJ2-3	TRAC	TRAV35	TRAJ39	TGTGCTGGCCCCCCGATCAATAATGCAGGCAACATGCTCACCTTT	TRAC	TRBV9	TRBJ2-3	TGTGCCAGCAGCGGAACTAGCACAGATACGCAGTATTTT	1	Blood	10571	FALSE	FALSE	FALSE
CGCTATCCAAGGACAC-1-P190604_Blood_2	clone_P190604:9788:1	P190604	P190604_TRAV13-2_TGTGCAGAGACGGGGAACCAGGGAGGAAAGCTTATCTTC_TRAJ23:P190604_TRBV15_TGTGCCACCAGCAGAGGGGTGTCAGGCCTCCAAGAGACCCAGTACTTC_TRBJ2-5	TRAC	TRAV13-2	TRAJ23	TGTGCAGAGACGGGGAACCAGGGAGGAAAGCTTATCTTC	TRAC	TRBV15	TRBJ2-5	TGTGCCACCAGCAGAGGGGTGTCAGGCCTCCAAGAGACCCAGTACTTC	1	Blood	9788	FALSE	FALSE	FALSE
CGCTGGAAGATCGGGT-1-P190604_Blood_2	clone_P190604:9748:1	P190604	P190604_TRAV13-1_TGTGCAGCACCCAACCAGGCAGGAACTGCTCTGATCTTT_TRAJ15:P190604_TRBV3-1_TGTGCCAGCAGCCAAGCCTGGGGGACAGGGGACTACGAGCAGTACTTC_TRBJ2-7	TRAC	TRAV13-1	TRAJ15	TGTGCAGCACCCAACCAGGCAGGAACTGCTCTGATCTTT	TRAC	TRBV3-1	TRBJ2-7	TGTGCCAGCAGCCAAGCCTGGGGGACAGGGGACTACGAGCAGTACTTC	1	Blood	9748	FALSE	FALSE	FALSE
CGCTGGAGTGCACTTA-1-P190604_Blood_2	clone_P190604:10896:1	P190604	P190604_TRAV8-4_TGTGCTGTGAGCGTTAACGACTACAAGCTCAGCTTT_TRAJ20:P190604_TRBV19_TGTGCCAGTAGCGGACTAGCGGGAACCGCCGGGGAGCTGTTTTTT_TRBJ2-2	TRAC	TRAV8-4	TRAJ20	TGTGCTGTGAGCGTTAACGACTACAAGCTCAGCTTT	TRAC	TRBV19	TRBJ2-2	TGTGCCAGTAGCGGACTAGCGGGAACCGCCGGGGAGCTGTTTTTT	1	Blood	10896	FALSE	FALSE	FALSE
CGCTTCAAGACTTGAA-1-P190604_Blood_2	clone_P190604:11031:1	P190604	P190604_TRAV9-2_TGTGCTCTGATCCTATGGGACACGGGCAGGAGAGCACTTACTTTT_TRAJ5:P190604_TRBV28_TGTGCCAGCAGTCCAGGGGGAGCCTATCCTCAGCCCCAGCATTTT_TRBJ1-5	TRAC	TRAV9-2	TRAJ5	TGTGCTCTGATCCTATGGGACACGGGCAGGAGAGCACTTACTTTT	TRAC	TRBV28	TRBJ1-5	TGTGCCAGCAGTCCAGGGGGAGCCTATCCTCAGCCCCAGCATTTT	1	Blood	11031	FALSE	FALSE	FALSE
CGGAGTCGTCTCTTAT-1-P190604_Blood_2	clone_P190604:9706:1	P190604	P190604_TRAV13-1_TGTGCAGCAAGTAAAAATTCCGGGTATGCACTCAACTTC_TRAJ41:P190604_TRBV4-2_TGTGCCAGCAGCCAAGAGCAGGGATTGGGCACTGAAGCTTTCTTT_TRBJ1-1	TRAC	TRAV13-1	TRAJ41	TGTGCAGCAAGTAAAAATTCCGGGTATGCACTCAACTTC	TRAC	TRBV4-2	TRBJ1-1	TGTGCCAGCAGCCAAGAGCAGGGATTGGGCACTGAAGCTTTCTTT	1	Blood	9706	FALSE	FALSE	FALSE
CGGCTAGTCACTTACT-1-P190604_Blood_2	clone_P190604:10421:60	P190604	P190604_TRAV29/DV5_TGTGCAGCAAGCGCCCATAGTGGAGGTAGCAACTATAAACTGACATTT_TRAJ53:P190604_TRBV7-9_TGTGCCACCAGATTAGGGTACGAGCAGTACTTC_TRBJ2-7	TRAC	TRAV29/DV5	TRAJ53	TGTGCAGCAAGCGCCCATAGTGGAGGTAGCAACTATAAACTGACATTT	TRAC	TRBV7-9	TRBJ2-7	TGTGCCACCAGATTAGGGTACGAGCAGTACTTC	60	Blood	10421	TRUE	FALSE	FALSE
CGGTTAATCGGCGGTT-1-P190604_Blood_2	clone_P190604:10438:1	P190604	P190604_TRAV29/DV5_TGTGCAGCAAGCGCGGGAAGAGATAGTGGAGGTAGCAACTATAAACTGACATTT_TRAJ53:P190604_TRBV5-1_TGCGCCAGCAGCGTACAGGGAGGCAATCAGCCCCAGCATTTT_TRBJ1-5	TRAC	TRAV29/DV5	TRAJ53	TGTGCAGCAAGCGCGGGAAGAGATAGTGGAGGTAGCAACTATAAACTGACATTT	TRAC	TRBV5-1	TRBJ1-5	TGCGCCAGCAGCGTACAGGGAGGCAATCAGCCCCAGCATTTT	1	Blood	10438	FALSE	FALSE	FALSE
CGTAGCGAGAGCTGCA-1-P190604_Blood_2	clone_P190604:10115:29	P190604	P190604_TRAV21_TGTGCTGCGGGGATGGATAGCAACTATCAGTTAATCTGG_TRAJ33:P190604_TRBV27_TGTGCCAGCAGTCCTCGGACAGGGACCGGCGAGCAGTACTTC_TRBJ2-7	TRAC	TRAV21	TRAJ33	TGTGCTGCGGGGATGGATAGCAACTATCAGTTAATCTGG	TRAC	TRBV27	TRBJ2-7	TGTGCCAGCAGTCCTCGGACAGGGACCGGCGAGCAGTACTTC	29	Blood	10115	TRUE	FALSE	FALSE
CGTAGCGAGCCCAACC-1-P190604_Blood_2	clone_P190604:9318:1	P190604	P190604_TRAV1-1_TGCGCTTCGGGAACTGGGGCAAACAACCTCTTCTTT_TRAJ36:P190604_TRBV9_TGTGCCAGCAGCGTCGGAGGGGGTCTGGGTAGAAACACCATATATTTT_TRBJ1-3	TRAC	TRAV1-1	TRAJ36	TGCGCTTCGGGAACTGGGGCAAACAACCTCTTCTTT	TRAC	TRBV9	TRBJ1-3	TGTGCCAGCAGCGTCGGAGGGGGTCTGGGTAGAAACACCATATATTTT	1	Blood	9318	FALSE	FALSE	FALSE
CGTAGGCTCGTTGACA-1-P190604_Blood_2	clone_P190604:10377:1	P190604	P190604_TRAV27_TGTGCAGGAGCGAACCTGAAAACCTCCTACGACAAGGTGATATTT_TRAJ50:P190604_TRBV20-1_TGCAGTGCTAGAGACTTGACAGGGCGGTACCAAGAGACCCAGTACTTC_TRBJ2-5	TRAC	TRAV27	TRAJ50	TGTGCAGGAGCGAACCTGAAAACCTCCTACGACAAGGTGATATTT	TRAC	TRBV20-1	TRBJ2-5	TGCAGTGCTAGAGACTTGACAGGGCGGTACCAAGAGACCCAGTACTTC	1	Blood	10377	FALSE	FALSE	FALSE
CGTCACTAGGTGATTA-1-P190604_Blood_2	clone_P190604:9759:5	P190604	P190604_TRAV13-1_TGTGCAGCTTCTCTCCGTGGTGGTACTAGCTATGGAAAGCTGACATTT_TRAJ52:P190604_TRBV20-1_TGCAGTGCTAGGTCAGGATATTTCGGGGAGCTGTTTTTT_TRBJ2-2	TRAC	TRAV13-1	TRAJ52	TGTGCAGCTTCTCTCCGTGGTGGTACTAGCTATGGAAAGCTGACATTT	TRAC	TRBV20-1	TRBJ2-2	TGCAGTGCTAGGTCAGGATATTTCGGGGAGCTGTTTTTT	5	Blood	9759	TRUE	FALSE	FALSE
CGTCACTTCAGGTTCA-1-P190604_Blood_2	clone_P190604:9874:1	P190604	P190604_TRAV16_TGTGCTCTAAGAGGTGGAGGCTTCAAAACTATCTTT_TRAJ9:P190604_TRBV2_TGTGCCAGCAGGATCCAAGAGACCCAGTACTTC_TRBJ2-5	TRAC	TRAV16	TRAJ9	TGTGCTCTAAGAGGTGGAGGCTTCAAAACTATCTTT	TRAC	TRBV2	TRBJ2-5	TGTGCCAGCAGGATCCAAGAGACCCAGTACTTC	1	Blood	9874	FALSE	FALSE	FALSE
CGTCACTTCGCCAAAT-1-P190604_Blood_2	clone_P190604:10477:1	P190604	P190604_TRAV3_TGTGCTGAAGAGGGGCGTGGCTACAATAAGCTGATTTTT_TRAJ4:P190604_TRBV9_TGTGCCAGCAGCGCCGGACTAGCGGGAGGAGGCGGGGAGCTGTTTTTT_TRBJ2-2	TRAC	TRAV3	TRAJ4	TGTGCTGAAGAGGGGCGTGGCTACAATAAGCTGATTTTT	TRAC	TRBV9	TRBJ2-2	TGTGCCAGCAGCGCCGGACTAGCGGGAGGAGGCGGGGAGCTGTTTTTT	1	Blood	10477	FALSE	FALSE	FALSE
CGTCACTTCGGCTTGG-1-P190604_Blood_2	clone_P190604:9879:1	P190604	P190604_TRAV16_TGTGCTCTAAGTGGGTATGGAGGAAGCCAAGGAAATCTCATCTTT_TRAJ42:P190604_TRBV28_TGTGCCAGCAGTTTACCAGGGGGCGGTTATGAAAAACTGTTTTTT_TRBJ1-4	TRAC	TRAV16	TRAJ42	TGTGCTCTAAGTGGGTATGGAGGAAGCCAAGGAAATCTCATCTTT	TRAC	TRBV28	TRBJ1-4	TGTGCCAGCAGTTTACCAGGGGGCGGTTATGAAAAACTGTTTTTT	1	Blood	9879	FALSE	FALSE	FALSE
CGTGTAAGTCCTCTTG-1-P190604_Blood_2	clone_P190604:10149:1	P190604	P190604_TRAV21_TGTGCTGTGAGGCCGGACGACTACAAGCTCAGCTTT_TRAJ20:P190604_TRBV28_TGTGCCACCGGGACTAGTTACAATGAGCAGTTCTTC_TRBJ2-1	TRAC	TRAV21	TRAJ20	TGTGCTGTGAGGCCGGACGACTACAAGCTCAGCTTT	TRAC	TRBV28	TRBJ2-1	TGTGCCACCGGGACTAGTTACAATGAGCAGTTCTTC	1	Blood	10149	FALSE	FALSE	FALSE
CGTTAGACACACCGAC-1-P190604_Blood_2	clone_P190604:9755:1	P190604	P190604_TRAV13-1_TGTGCAGCCGAATTGTCGAACACCGGTAACCAGTTCTATTTT_TRAJ49:P190604_TRBV7-9_TGTGCCAGCAGCTCCACAGGGGCGGGTGGCTACACCTTC_TRBJ1-2	TRAC	TRAV13-1	TRAJ49	TGTGCAGCCGAATTGTCGAACACCGGTAACCAGTTCTATTTT	TRAC	TRBV7-9	TRBJ1-2	TGTGCCAGCAGCTCCACAGGGGCGGGTGGCTACACCTTC	1	Blood	9755	FALSE	FALSE	FALSE
CGTTGGGGTACTTGAC-1-P190604_Blood_2	clone_P190604:10029:1	P190604	P190604_TRAV2_TGTGCTGCCCTCAGGGATTCAGGAAACACACCTCTTGTCTTT_TRAJ29:P190604_TRBV7-2_TGTGCCAGCAGCTTAGGAGATTTTGTCTGGACAGATACGCAGTATTTT_TRBJ2-3	TRAC	TRAV2	TRAJ29	TGTGCTGCCCTCAGGGATTCAGGAAACACACCTCTTGTCTTT	TRAC	TRBV7-2	TRBJ2-3	TGTGCCAGCAGCTTAGGAGATTTTGTCTGGACAGATACGCAGTATTTT	1	Blood	10029	FALSE	FALSE	FALSE
CTAACTTTCATGTAGC-1-P190604_Blood_2	clone_P190604:9774:1	P190604	P190604_TRAV13-2_TGTGCAGAGAATAGGTCTGGGGCTGGGAGTTACCAACTCACTTTC_TRAJ28:P190604_TRBV11-1_TGTGCCAGCAGCCTCTTGATAGGGAATGAGGACAATGAGCAGTTCTTC_TRBJ2-1	TRAC	TRAV13-2	TRAJ28	TGTGCAGAGAATAGGTCTGGGGCTGGGAGTTACCAACTCACTTTC	TRAC	TRBV11-1	TRBJ2-1	TGTGCCAGCAGCCTCTTGATAGGGAATGAGGACAATGAGCAGTTCTTC	1	Blood	9774	FALSE	FALSE	FALSE
CTACACCTCAGCTGGC-1-P190604_Blood_2	clone_P190604:9867:1	P190604	P190604_TRAV16_TGTGCTCCCCCTAGGGTGCGTGTCCAGTTCTATTTT_TRAJ49:P190604_TRBV4-2_TGTGCCAGCAGCCAAGACCATAGCGGGAGGGCTGCAGATACGCAGTATTTT_TRBJ2-3	TRAC	TRAV16	TRAJ49	TGTGCTCCCCCTAGGGTGCGTGTCCAGTTCTATTTT	TRAC	TRBV4-2	TRBJ2-3	TGTGCCAGCAGCCAAGACCATAGCGGGAGGGCTGCAGATACGCAGTATTTT	1	Blood	9867	FALSE	FALSE	FALSE
CTACACCTCGTCACGG-1-P190604_Blood_2	clone_P190604:10525:1	P190604	P190604_TRAV3_TGTGCTGTGAGAGAGTGGTCTGGGGCTGGGAGTTACCAACTCACTTTC_TRAJ28:P190604_TRBV28_TGTGCCAGCAGGGAAAGAGCGGGAGGAGGGTCAGGGGATACGCAGTATTTT_TRBJ2-3	TRAC	TRAV3	TRAJ28	TGTGCTGTGAGAGAGTGGTCTGGGGCTGGGAGTTACCAACTCACTTTC	TRAC	TRBV28	TRBJ2-3	TGTGCCAGCAGGGAAAGAGCGGGAGGAGGGTCAGGGGATACGCAGTATTTT	1	Blood	10525	FALSE	FALSE	FALSE
CTACATTAGACAAAGG-1-P190604_Blood_2	clone_P190604:10117:1	P190604	P190604_TRAV21_TGTGCTGCTTATACCTCAGGAACCTACAAATACATCTTT_TRAJ40:P190604_TRBV7-9_TGTGCCAGCAGCTTAGTTTGGCAGGGAAGCGGCTACACCTTC_TRBJ1-2	TRAC	TRAV21	TRAJ40	TGTGCTGCTTATACCTCAGGAACCTACAAATACATCTTT	TRAC	TRBV7-9	TRBJ1-2	TGTGCCAGCAGCTTAGTTTGGCAGGGAAGCGGCTACACCTTC	1	Blood	10117	FALSE	FALSE	FALSE
CTACGTCGTCCTAGCG-1-P190604_Blood_2	clone_P190604:10532:1	P190604	P190604_TRAV3_TGTGCTGTGAGAGCTAACTCTGGGGCTGGGAGTTACCAACTCACTTTC_TRAJ28:P190604_TRBV28_TGTGCCAGCAGATGGACAGGGTACCCTGGCTACACCTTC_TRBJ1-2	TRAC	TRAV3	TRAJ28	TGTGCTGTGAGAGCTAACTCTGGGGCTGGGAGTTACCAACTCACTTTC	TRAC	TRBV28	TRBJ1-2	TGTGCCAGCAGATGGACAGGGTACCCTGGCTACACCTTC	1	Blood	10532	FALSE	FALSE	FALSE
CTACGTCGTTGGACCC-1-P190604_Blood_2	clone_P190604:10115:29	P190604	P190604_TRAV21_TGTGCTGCGGGGATGGATAGCAACTATCAGTTAATCTGG_TRAJ33:P190604_TRBV27_TGTGCCAGCAGTCCTCGGACAGGGACCGGCGAGCAGTACTTC_TRBJ2-7	TRAC	TRAV21	TRAJ33	TGTGCTGCGGGGATGGATAGCAACTATCAGTTAATCTGG	TRAC	TRBV27	TRBJ2-7	TGTGCCAGCAGTCCTCGGACAGGGACCGGCGAGCAGTACTTC	29	Blood	10115	TRUE	FALSE	FALSE
CTAGAGTGTTCCTCCA-1-P190604_Blood_2	clone_P190604:10265:1	P190604	P190604_TRAV25_TGTGCAGCAAGGCGGGATAGCAACTATCAGTTAATCTGG_TRAJ33:P190604_TRBV2_TGTGCCAGCAGTCCGGGACAGAGTTACGAGCAGTACTTC_TRBJ2-7	TRAC	TRAV25	TRAJ33	TGTGCAGCAAGGCGGGATAGCAACTATCAGTTAATCTGG	TRAC	TRBV2	TRBJ2-7	TGTGCCAGCAGTCCGGGACAGAGTTACGAGCAGTACTTC	1	Blood	10265	FALSE	FALSE	FALSE
CTAGTGATCGGAAATA-1-P190604_Blood_2	clone_P190604:9737:1	P190604	P190604_TRAV13-1_TGTGCAGCAAGTCTCGCATCAGGAGGAAGCTACATACCTACATTT_TRAJ6:P190604_TRBV28_TGTGCCAGCAGTTTGGGACTAGCGGTCTACGAGCAGTACTTC_TRBJ2-7	TRAC	TRAV13-1	TRAJ6	TGTGCAGCAAGTCTCGCATCAGGAGGAAGCTACATACCTACATTT	TRAC	TRBV28	TRBJ2-7	TGTGCCAGCAGTTTGGGACTAGCGGTCTACGAGCAGTACTTC	1	Blood	9737	FALSE	FALSE	FALSE
CTCACACTCATCGATG-1-P190604_Blood_2	clone_P190604:10421:60	P190604	P190604_TRAV29/DV5_TGTGCAGCAAGCGCCCATAGTGGAGGTAGCAACTATAAACTGACATTT_TRAJ53:P190604_TRBV7-9_TGTGCCACCAGATTAGGGTACGAGCAGTACTTC_TRBJ2-7	TRAC	TRAV29/DV5	TRAJ53	TGTGCAGCAAGCGCCCATAGTGGAGGTAGCAACTATAAACTGACATTT	TRAC	TRBV7-9	TRBJ2-7	TGTGCCACCAGATTAGGGTACGAGCAGTACTTC	60	Blood	10421	TRUE	FALSE	FALSE
CTCATTAGTGTTTGTG-1-P190604_Blood_2	clone_P190604:10866:1	P190604	P190604_TRAV8-3_TGTGCTGTGGGTGTAAGGGCCAGACTCATGTTT_TRAJ31:P190604_TRBV6-6_TGTGCCAGCAGTACGCGGGGCGGATTGAACACTGAAGCTTTCTTT_TRBJ1-1	TRAC	TRAV8-3	TRAJ31	TGTGCTGTGGGTGTAAGGGCCAGACTCATGTTT	TRAC	TRBV6-6	TRBJ1-1	TGTGCCAGCAGTACGCGGGGCGGATTGAACACTGAAGCTTTCTTT	1	Blood	10866	FALSE	FALSE	FALSE
CTCGAGGCAAGGTTTC-1-P190604_Blood_2	clone_P190604:10998:1	P190604	P190604_TRAV9-2_TGTGCTCTGAGTCAGAAAGGGAGCTTTGGAAATGAGAAATTAACCTTT_TRAJ48:P190604_TRBV5-1_TGCGCCAGCAGCCAGGGACCGACCAGCTACGAGCAGTACTTC_TRBJ2-7	TRAC	TRAV9-2	TRAJ48	TGTGCTCTGAGTCAGAAAGGGAGCTTTGGAAATGAGAAATTAACCTTT	TRAC	TRBV5-1	TRBJ2-7	TGCGCCAGCAGCCAGGGACCGACCAGCTACGAGCAGTACTTC	1	Blood	10998	FALSE	FALSE	FALSE
CTCGAGGGTCGAAAGC-1-P190604_Blood_2	clone_P190604:10458:1	P190604	P190604_TRAV29/DV5_TGTGCAGCAAGTTACCCTGGGGGTGCTGACGGACTCACCTTT_TRAJ45:P190604_TRBV5-4_TGTGCCAGCAGTTGGGCCTCCCTCGGGGGCTACACCTTC_TRBJ1-2	TRAC	TRAV29/DV5	TRAJ45	TGTGCAGCAAGTTACCCTGGGGGTGCTGACGGACTCACCTTT	TRAC	TRBV5-4	TRBJ1-2	TGTGCCAGCAGTTGGGCCTCCCTCGGGGGCTACACCTTC	1	Blood	10458	FALSE	FALSE	FALSE
CTCGGAGGTCGGCACT-1-P190604_Blood_2	clone_P190604:9643:1	P190604	P190604_TRAV12-2_TGTGCCGTGTCTGGGGCCTCTGGTGGTACTAGCTATGGAAAGCTGACATTT_TRAJ52:P190604_TRBV7-2_TGTGCCAGCAGCTTATACGGACTAGCATTTGAGACCCAGTACTTC_TRBJ2-5	TRAC	TRAV12-2	TRAJ52	TGTGCCGTGTCTGGGGCCTCTGGTGGTACTAGCTATGGAAAGCTGACATTT	TRAC	TRBV7-2	TRBJ2-5	TGTGCCAGCAGCTTATACGGACTAGCATTTGAGACCCAGTACTTC	1	Blood	9643	FALSE	FALSE	FALSE
CTCGGGAGTAAACCTC-1-P190604_Blood_2	clone_P190604:9608:1	P190604	P190604_TRAV12-2_TGTGCCGTGAACGGCCCGGGCAGGAGAGCACTTACTTTT_TRAJ5:P190604_TRBV28_TGTGCCAGCAGCCATTCCCGGGGTTACACTGAAGCTTTCTTT_TRBJ1-1	TRAC	TRAV12-2	TRAJ5	TGTGCCGTGAACGGCCCGGGCAGGAGAGCACTTACTTTT	TRAC	TRBV28	TRBJ1-1	TGTGCCAGCAGCCATTCCCGGGGTTACACTGAAGCTTTCTTT	1	Blood	9608	FALSE	FALSE	FALSE
CTCGTCACATCCAACA-1-P190604_Blood_2	clone_P190604:10497:1	P190604	P190604_TRAV3_TGTGCTGTGAGAGACATACAAGCTGCAGGCAACAAGCTAACTTTT_TRAJ17:P190604_TRBV7-9_TGTGCCAGCAGCTCAACATCGGGGCCTACTTTTTCTAGCACAGATACGCAGTATTTT_TRBJ2-3	TRAC	TRAV3	TRAJ17	TGTGCTGTGAGAGACATACAAGCTGCAGGCAACAAGCTAACTTTT	TRAC	TRBV7-9	TRBJ2-3	TGTGCCAGCAGCTCAACATCGGGGCCTACTTTTTCTAGCACAGATACGCAGTATTTT	1	Blood	10497	FALSE	FALSE	FALSE
CTGAAACGTAAAGTCA-1-P190604_Blood_2	clone_P190604:9584:1	P190604	P190604_TRAV12-2_TGTGCCGTGAAATACAACTTCAACAAATTTTACTTT_TRAJ21:P190604_TRBV28_TGTGCCAGCAGTTTATATACGGGGGGGGGAGGGACGACTAATGAGCAGTTCTTC_TRBJ2-1	TRAC	TRAV12-2	TRAJ21	TGTGCCGTGAAATACAACTTCAACAAATTTTACTTT	TRAC	TRBV28	TRBJ2-1	TGTGCCAGCAGTTTATATACGGGGGGGGGAGGGACGACTAATGAGCAGTTCTTC	1	Blood	9584	FALSE	FALSE	FALSE
CTGAAGTAGAGTGACC-1-P190604_Blood_2	clone_P190604:9611:6	P190604	P190604_TRAV12-2_TGTGCCGTGAACGGGGCTTCTGGTTCTGCAAGGCAACTGACCTTT_TRAJ22:P190604_TRBV6-1_TGTGCCAGCACCGGGACAGGGCTTAACGAGCAGTACTTC_TRBJ2-7	TRAC	TRAV12-2	TRAJ22	TGTGCCGTGAACGGGGCTTCTGGTTCTGCAAGGCAACTGACCTTT	TRAC	TRBV6-1	TRBJ2-7	TGTGCCAGCACCGGGACAGGGCTTAACGAGCAGTACTTC	6	Blood	9611	TRUE	FALSE	FALSE
CTGAAGTTCCACGTGG-1-P190604_Blood_2	clone_P190604:10294:1	P190604	P190604_TRAV26-1_TGCATCGTCAAGGGTGGTACTAGCTATGGAAAGCTGACATTT_TRAJ52:P190604_TRBV20-1_TGCAGTGCGCCTATGGAGGTTGGGACTGAAGCTTTCTTT_TRBJ1-1	TRAC	TRAV26-1	TRAJ52	TGCATCGTCAAGGGTGGTACTAGCTATGGAAAGCTGACATTT	TRAC	TRBV20-1	TRBJ1-1	TGCAGTGCGCCTATGGAGGTTGGGACTGAAGCTTTCTTT	1	Blood	10294	FALSE	FALSE	FALSE
CTGCCTACAGAGTGTG-1-P190604_Blood_2	clone_P190604:9650:1	P190604	P190604_TRAV12-2_TGTGCCTCCGAAGATGGCCAGAAGCTGCTCTTT_TRAJ16:P190604_TRBV5-1_TGCGCCAGCAGCTTGGCCGGACCGAGATACAATGAGCAGTTCTTC_TRBJ2-1	TRAC	TRAV12-2	TRAJ16	TGTGCCTCCGAAGATGGCCAGAAGCTGCTCTTT	TRAC	TRBV5-1	TRBJ2-1	TGCGCCAGCAGCTTGGCCGGACCGAGATACAATGAGCAGTTCTTC	1	Blood	9650	FALSE	FALSE	FALSE
CTTAACTAGTGTCTCA-1-P190604_Blood_2	clone_P190604:9854:1	P190604	P190604_TRAV14/DV4_TGTGCAATGAGAGGTGGCGACAATGACATGCGCTTT_TRAJ43:P190604_TRBV19_TGTGCCACCAAAGGAAATGGCTACACCTTC_TRBJ1-2	TRAC	TRAV14/DV4	TRAJ43	TGTGCAATGAGAGGTGGCGACAATGACATGCGCTTT	TRAC	TRBV19	TRBJ1-2	TGTGCCACCAAAGGAAATGGCTACACCTTC	1	Blood	9854	FALSE	FALSE	FALSE
CTTAGGATCGCATGAT-1-P190604_Blood_2	clone_P190604:10700:1	P190604	P190604_TRAV41_TGTGCCGGAGGAAGCCAAGGAAATCTCATCTTT_TRAJ42:P190604_TRBV4-1_TGCGCCAGCAGCCTTGGGAGGGTCCGACTTGGCACAGATACGCAGTATTTT_TRBJ2-3	TRAC	TRAV41	TRAJ42	TGTGCCGGAGGAAGCCAAGGAAATCTCATCTTT	TRAC	TRBV4-1	TRBJ2-3	TGCGCCAGCAGCCTTGGGAGGGTCCGACTTGGCACAGATACGCAGTATTTT	1	Blood	10700	FALSE	FALSE	FALSE
CTTCTCTCAATCCGAT-1-P190604_Blood_2	clone_P190604:10499:1	P190604	P190604_TRAV3_TGTGCTGTGAGAGACATCAAGGGCTCTAGCAACACAGGCAAACTAATCTTT_TRAJ37:P190604_TRBV28_TGTGCCAGCAGTCCAGGGGGGACAGGAGGCTCCTACAATGAGCAGTTCTTC_TRBJ2-1	TRAC	TRAV3	TRAJ37	TGTGCTGTGAGAGACATCAAGGGCTCTAGCAACACAGGCAAACTAATCTTT	TRAC	TRBV28	TRBJ2-1	TGTGCCAGCAGTCCAGGGGGGACAGGAGGCTCCTACAATGAGCAGTTCTTC	1	Blood	10499	FALSE	FALSE	FALSE
CTTGGCTAGCCACGTC-1-P190604_Blood_2	clone_P190604:9294:1	P190604	P190604_TRAV1-1_TGCGCTGGATCCATGGATAGCAACTATCAGTTAATCTGG_TRAJ33:P190604_TRBV11-2_TGTGCCAGCAGCTGGGGGGGCGGGGGTCAAGAGACCCAGTACTTC_TRBJ2-5	TRAC	TRAV1-1	TRAJ33	TGCGCTGGATCCATGGATAGCAACTATCAGTTAATCTGG	TRAC	TRBV11-2	TRBJ2-5	TGTGCCAGCAGCTGGGGGGGCGGGGGTCAAGAGACCCAGTACTTC	1	Blood	9294	FALSE	FALSE	FALSE
CTTTGCGGTACGCTGC-1-P190604_Blood_2	clone_P190604:10991:1	P190604	P190604_TRAV9-2_TGTGCTCTGAGCGAATCTAACTTTGGAAATGAGAAATTAACCTTT_TRAJ48:P190604_TRBV5-1_TGCGCCAGCAGCCCGACTAGCGGGAGATCATACAATGAGCAGTTCTTC_TRBJ2-1	TRAC	TRAV9-2	TRAJ48	TGTGCTCTGAGCGAATCTAACTTTGGAAATGAGAAATTAACCTTT	TRAC	TRBV5-1	TRBJ2-1	TGCGCCAGCAGCCCGACTAGCGGGAGATCATACAATGAGCAGTTCTTC	1	Blood	10991	FALSE	FALSE	FALSE
GAAATGATCAACGGCC-1-P190604_Blood_2	clone_P190604:10115:29	P190604	P190604_TRAV21_TGTGCTGCGGGGATGGATAGCAACTATCAGTTAATCTGG_TRAJ33:P190604_TRBV27_TGTGCCAGCAGTCCTCGGACAGGGACCGGCGAGCAGTACTTC_TRBJ2-7	TRAC	TRAV21	TRAJ33	TGTGCTGCGGGGATGGATAGCAACTATCAGTTAATCTGG	TRAC	TRBV27	TRBJ2-7	TGTGCCAGCAGTCCTCGGACAGGGACCGGCGAGCAGTACTTC	29	Blood	10115	TRUE	FALSE	FALSE
GAACCTAAGGCTATCT-1-P190604_Blood_2	clone_P190604:10903:1	P190604	P190604_TRAV8-4_TGTGCTGTGAGTGAAAGAACTGGGGCAAACAACCTCTTCTTT_TRAJ36:P190604_TRBV10-3_TGTGCCATCAGCCTTATGGGATTGGCGGAAGAGACCCAGTACTTC_TRBJ2-5	TRAC	TRAV8-4	TRAJ36	TGTGCTGTGAGTGAAAGAACTGGGGCAAACAACCTCTTCTTT	TRAC	TRBV10-3	TRBJ2-5	TGTGCCATCAGCCTTATGGGATTGGCGGAAGAGACCCAGTACTTC	1	Blood	10903	FALSE	FALSE	FALSE
GAATAAGAGCTAGTGG-1-P190604_Blood_2	clone_P190604:9839:1	P190604	P190604_TRAV14/DV4_TGTGCAATGAGAGAGGGCTCGACTAGCTATGGAAAGCTGACATTT_TRAJ52:P190604_TRBV2_TGTGCCAGCAGTGATCGGTTTACAGGGGGCGTCCGTGGCTACACCTTC_TRBJ1-2	TRAC	TRAV14/DV4	TRAJ52	TGTGCAATGAGAGAGGGCTCGACTAGCTATGGAAAGCTGACATTT	TRAC	TRBV2	TRBJ1-2	TGTGCCAGCAGTGATCGGTTTACAGGGGGCGTCCGTGGCTACACCTTC	1	Blood	9839	FALSE	FALSE	FALSE
GAATAAGTCAGGCCCA-1-P190604_Blood_2	clone_P190604:10154:1	P190604	P190604_TRAV21_TGTGCTGTGAGGGACTATGGTCAGAATTTTGTCTTT_TRAJ26:P190604_TRBV7-9_TGTGCCAGCAGCCCCCTGGCAGGGCGGTTCGCGGAAGGATCCTACGAGCAGTACTTC_TRBJ2-7	TRAC	TRAV21	TRAJ26	TGTGCTGTGAGGGACTATGGTCAGAATTTTGTCTTT	TRAC	TRBV7-9	TRBJ2-7	TGTGCCAGCAGCCCCCTGGCAGGGCGGTTCGCGGAAGGATCCTACGAGCAGTACTTC	1	Blood	10154	FALSE	FALSE	FALSE
GACACGCAGCGTCAAG-1-P190604_Blood_2	clone_P190604:10963:1	P190604	P190604_TRAV8-6_TGTGCTGTGAGTTTACAGGGAGCCCAGAAGCTGGTATTT_TRAJ54:P190604_TRBV28_TGTGCCAGCAGCTCGCGGGGACAGGGGGAAAACCAGCCCCAGCATTTT_TRBJ1-5	TRAC	TRAV8-6	TRAJ54	TGTGCTGTGAGTTTACAGGGAGCCCAGAAGCTGGTATTT	TRAC	TRBV28	TRBJ1-5	TGTGCCAGCAGCTCGCGGGGACAGGGGGAAAACCAGCCCCAGCATTTT	1	Blood	10963	FALSE	FALSE	FALSE
GACAGAGCAACACGCC-1-P190604_Blood_2	clone_P190604:9304:1	P190604	P190604_TRAV1-1_TGCGCTGTGAGAGATGAAAGGCAGGCAGGAACTGCTCTGATCTTT_TRAJ15:P190604_TRBV18_TGTGCCAGCTCACTGGGGACGGAAAGCTCCTACGAGCAGTACTTC_TRBJ2-7	TRAC	TRAV1-1	TRAJ15	TGCGCTGTGAGAGATGAAAGGCAGGCAGGAACTGCTCTGATCTTT	TRAC	TRBV18	TRBJ2-7	TGTGCCAGCTCACTGGGGACGGAAAGCTCCTACGAGCAGTACTTC	1	Blood	9304	FALSE	FALSE	FALSE
GACAGAGCAGGGATTG-1-P190604_Blood_2	clone_P190604:9915:8	P190604	P190604_TRAV17_TGTGCTACGGACGCCTTATCAGGAACCTACAAATACATCTTT_TRAJ40:P190604_TRBV13_TGTGCCAGCAGCTTAGGGCCCCCACTAGCGGGACAATACGAGCAGTACTTC_TRBJ2-7	TRAC	TRAV17	TRAJ40	TGTGCTACGGACGCCTTATCAGGAACCTACAAATACATCTTT	TRAC	TRBV13	TRBJ2-7	TGTGCCAGCAGCTTAGGGCCCCCACTAGCGGGACAATACGAGCAGTACTTC	8	Blood	9915	TRUE	FALSE	FALSE
GACCTGGGTGCACCAC-1-P190604_Blood_2	clone_P190604:10365:1	P190604	P190604_TRAV27_TGTGCAGGAGAAACGGGGGACTTTGGAAATGAGAAATTAACCTTT_TRAJ48:P190604_TRBV11-3_TGTGCCAGCAGCTTAGCGGGTGGGATTAGCTCCTACAATGAGCAGTTCTTC_TRBJ2-1	TRAC	TRAV27	TRAJ48	TGTGCAGGAGAAACGGGGGACTTTGGAAATGAGAAATTAACCTTT	TRAC	TRBV11-3	TRBJ2-1	TGTGCCAGCAGCTTAGCGGGTGGGATTAGCTCCTACAATGAGCAGTTCTTC	1	Blood	10365	FALSE	FALSE	FALSE
GACGCGTAGGCTAGAC-1-P190604_Blood_2	clone_P190604:10421:60	P190604	P190604_TRAV29/DV5_TGTGCAGCAAGCGCCCATAGTGGAGGTAGCAACTATAAACTGACATTT_TRAJ53:P190604_TRBV7-9_TGTGCCACCAGATTAGGGTACGAGCAGTACTTC_TRBJ2-7	TRAC	TRAV29/DV5	TRAJ53	TGTGCAGCAAGCGCCCATAGTGGAGGTAGCAACTATAAACTGACATTT	TRAC	TRBV7-9	TRBJ2-7	TGTGCCACCAGATTAGGGTACGAGCAGTACTTC	60	Blood	10421	TRUE	FALSE	FALSE
GACGCGTTCTGTTTGT-1-P190604_Blood_2	clone_P190604:10259:1	P190604	P190604_TRAV24_TGTGCCTTTTTACTCGTGCAGGGAGGAGGTGCTGACGGACTCACCTTT_TRAJ45:P190604_TRBV9_TGTGCCAGCAGCCTCAGGACAGGGGGCATCTATGGCTACACCTTC_TRBJ1-2	TRAC	TRAV24	TRAJ45	TGTGCCTTTTTACTCGTGCAGGGAGGAGGTGCTGACGGACTCACCTTT	TRAC	TRBV9	TRBJ1-2	TGTGCCAGCAGCCTCAGGACAGGGGGCATCTATGGCTACACCTTC	1	Blood	10259	FALSE	FALSE	FALSE
GACGGCTAGACTCGGA-1-P190604_Blood_2	clone_P190604:9778:1	P190604	P190604_TRAV13-2_TGTGCAGAGAATATGTTATCCCGGGGCTTTGGAAATGAGAAATTAACCTTT_TRAJ48:P190604_TRBV12-5_TGTGCTAGTGGTTTGGTAATTACTATGGCAGAGGGGGCCTCCGGGGAGCTGTTTTTT_TRBJ2-2	TRAC	TRAV13-2	TRAJ48	TGTGCAGAGAATATGTTATCCCGGGGCTTTGGAAATGAGAAATTAACCTTT	TRAC	TRBV12-5	TRBJ2-2	TGTGCTAGTGGTTTGGTAATTACTATGGCAGAGGGGGCCTCCGGGGAGCTGTTTTTT	1	Blood	9778	FALSE	FALSE	FALSE
GACGTTATCAGTGTTG-1-P190604_Blood_2	clone_P190604:9298:1	P190604	P190604_TRAV1-1_TGCGCTGTGAAGGATGGGGCAAACAACCTCTTCTTT_TRAJ36:P190604_TRBV12-3_TGTGCCAGCAGTGCTAATATGAACACTGAAGCTTTCTTT_TRBJ1-1	TRAC	TRAV1-1	TRAJ36	TGCGCTGTGAAGGATGGGGCAAACAACCTCTTCTTT	TRAC	TRBV12-3	TRBJ1-1	TGTGCCAGCAGTGCTAATATGAACACTGAAGCTTTCTTT	1	Blood	9298	FALSE	FALSE	FALSE
GACTGCGGTTGATTGC-1-P190604_Blood_2	clone_P190604:10695:1	P190604	P190604_TRAV4_TGCCTCGTGGGTTCAACTGACAGCTGGGGGAAATTGCAGTTT_TRAJ24:P190604_TRBV6-1_TGTGCCAGCATGAGGTACGAGCAGTACTTC_TRBJ2-7	TRAC	TRAV4	TRAJ24	TGCCTCGTGGGTTCAACTGACAGCTGGGGGAAATTGCAGTTT	TRAC	TRBV6-1	TRBJ2-7	TGTGCCAGCATGAGGTACGAGCAGTACTTC	1	Blood	10695	FALSE	FALSE	FALSE
GAGGTGAAGAACTGTA-1-P190604_Blood_2	clone_P190604:10250:1	P190604	P190604_TRAV24_TGTGCCTGTGTGACCGGGGCTGGGAGTTACCAACTCACTTTC_TRAJ28:P190604_TRBV5-5_TGTGCCAGCAGCTTGGCCTGGTTAGCGGGGCTGAGAGAGCAGTACTTC_TRBJ2-7	TRAC	TRAV24	TRAJ28	TGTGCCTGTGTGACCGGGGCTGGGAGTTACCAACTCACTTTC	TRAC	TRBV5-5	TRBJ2-7	TGTGCCAGCAGCTTGGCCTGGTTAGCGGGGCTGAGAGAGCAGTACTTC	1	Blood	10250	FALSE	FALSE	FALSE
GAGTCCGAGGGAACGG-1-P190604_Blood_2	clone_P190604:10623:1	P190604	P190604_TRAV38-2/DV8_TGTGCTTATAAGGACGTAGTAACCTCCTACGACAAGGTGATATTT_TRAJ50:P190604_TRBV18_TGTGCCAGCTCACCGGACAGGGGGCATGAGGGCTACACCTTC_TRBJ1-2	TRAC	TRAV38-2/DV8	TRAJ50	TGTGCTTATAAGGACGTAGTAACCTCCTACGACAAGGTGATATTT	TRAC	TRBV18	TRBJ1-2	TGTGCCAGCTCACCGGACAGGGGGCATGAGGGCTACACCTTC	1	Blood	10623	FALSE	FALSE	FALSE
GATCAGTCACCGGAAA-1-P190604_Blood_2	clone_P190604:9820:1	P190604	P190604_TRAV14/DV4_TGTGCAATGAGAGAGGACAGTAACAATGACATGCGCTTT_TRAJ43:P190604_TRBV4-3_TGCGCCAGCAGCCAAGAGATAAGCGGGAGGCTGAGGGACATTCAGTACTTC_TRBJ2-4	TRAC	TRAV14/DV4	TRAJ43	TGTGCAATGAGAGAGGACAGTAACAATGACATGCGCTTT	TRAC	TRBV4-3	TRBJ2-4	TGCGCCAGCAGCCAAGAGATAAGCGGGAGGCTGAGGGACATTCAGTACTTC	1	Blood	9820	FALSE	FALSE	FALSE
GATCAGTTCTTCAACT-1-P190604_Blood_2	clone_P190604:10110:1	P190604	P190604_TRAV21_TGTGCTCCCTTCCCTATGAATTATGGAGGAAGCCAAGGAAATCTCATCTTT_TRAJ42:P190604_TRBV27_TGTGCCAGCAGTTTAAGGGGCGGGAGACCAGATACGCAGTATTTT_TRBJ2-3	TRAC	TRAV21	TRAJ42	TGTGCTCCCTTCCCTATGAATTATGGAGGAAGCCAAGGAAATCTCATCTTT	TRAC	TRBV27	TRBJ2-3	TGTGCCAGCAGTTTAAGGGGCGGGAGACCAGATACGCAGTATTTT	1	Blood	10110	FALSE	FALSE	FALSE
GATCGATCAACGATGG-1-P190604_Blood_2	clone_P190604:10455:1	P190604	P190604_TRAV29/DV5_TGTGCAGCAAGGGCTAACTTTGGAAATGAGAAATTAACCTTT_TRAJ48:P190604_TRBV5-1_TGCGCCAGCAGCCAACAGACAGGGTACGAGCAGTACTTC_TRBJ2-7	TRAC	TRAV29/DV5	TRAJ48	TGTGCAGCAAGGGCTAACTTTGGAAATGAGAAATTAACCTTT	TRAC	TRBV5-1	TRBJ2-7	TGCGCCAGCAGCCAACAGACAGGGTACGAGCAGTACTTC	1	Blood	10455	FALSE	FALSE	FALSE
GATCGATGTATAGTAG-1-P190604_Blood_2	clone_P190604:10716:1	P190604	P190604_TRAV41_TGTGCTGTCCCTTATGGTGGTGCTACAAACAAGCTCATCTTT_TRAJ32:P190604_TRBV28_TGTGCCAGCCGGGACAGGGGAAGCGAGCAGTACTTC_TRBJ2-7	TRAC	TRAV41	TRAJ32	TGTGCTGTCCCTTATGGTGGTGCTACAAACAAGCTCATCTTT	TRAC	TRBV28	TRBJ2-7	TGTGCCAGCCGGGACAGGGGAAGCGAGCAGTACTTC	1	Blood	10716	FALSE	FALSE	FALSE
GATCGATTCCGGCACA-1-P190604_Blood_2	clone_P190604:10983:20	P190604	P190604_TRAV9-2_TGTGCTCTGAGAAATACTGGAGGCTTCAAAACTATCTTT_TRAJ9:P190604_TRBV7-2_TGTGCCAGCAGCTCCGAAGCCAATCAGCCCCAGCATTTT_TRBJ1-5	TRAC	TRAV9-2	TRAJ9	TGTGCTCTGAGAAATACTGGAGGCTTCAAAACTATCTTT	TRAC	TRBV7-2	TRBJ1-5	TGTGCCAGCAGCTCCGAAGCCAATCAGCCCCAGCATTTT	20	Blood	10983	TRUE	FALSE	FALSE
GATGCTATCCAGTAGT-1-P190604_Blood_2	clone_P190604:9909:1	P190604	P190604_TRAV17_TGTGCTACGGACGAGGGTTCTGCAAGGCAACTGACCTTT_TRAJ22:P190604_TRBV5-4_TGTGCCAGCAGCTTGGGACTAGCGGGGTCCAATGAGCAGTTCTTC_TRBJ2-1	TRAC	TRAV17	TRAJ22	TGTGCTACGGACGAGGGTTCTGCAAGGCAACTGACCTTT	TRAC	TRBV5-4	TRBJ2-1	TGTGCCAGCAGCTTGGGACTAGCGGGGTCCAATGAGCAGTTCTTC	1	Blood	9909	FALSE	FALSE	FALSE
GATTCAGAGCGAAGGG-1-P190604_Blood_2	clone_P190604:10135:1	P190604	P190604_TRAV21_TGTGCTGTGAATCCCGATAGCAACTATCAGTTAATCTGG_TRAJ33:P190604_TRBV7-3_TGTGCCAGCAGCTTAAGCTGGGGGGCTGGAAACACCATATATTTT_TRBJ1-3	TRAC	TRAV21	TRAJ33	TGTGCTGTGAATCCCGATAGCAACTATCAGTTAATCTGG	TRAC	TRBV7-3	TRBJ1-3	TGTGCCAGCAGCTTAAGCTGGGGGGCTGGAAACACCATATATTTT	1	Blood	10135	FALSE	FALSE	FALSE
GATTCAGAGTTGTCGT-1-P190604_Blood_2	clone_P190604:10267:1	P190604	P190604_TRAV25_TGTGCAGGACCTTATAACACCGACAAGCTCATCTTT_TRAJ34:P190604_TRBV30_TGTGCCTGGAGTGTAATCAGGGGGCGCGGTGAGCAGTACTTC_TRBJ2-7	TRAC	TRAV25	TRAJ34	TGTGCAGGACCTTATAACACCGACAAGCTCATCTTT	TRAC	TRBV30	TRBJ2-7	TGTGCCTGGAGTGTAATCAGGGGGCGCGGTGAGCAGTACTTC	1	Blood	10267	FALSE	FALSE	FALSE
GATTCAGTCCCATTAT-1-P190604_Blood_2	clone_P190604:10860:1	P190604	P190604_TRAV8-3_TGTGCTGTGGGTGCGGGTGCAGGCAACATGCTCACCTTT_TRAJ39:P190604_TRBV7-3_TGTGCCAGCAGCCTTAGCGGGACCGCCTACAATGAGCAGTTCTTC_TRBJ2-1	TRAC	TRAV8-3	TRAJ39	TGTGCTGTGGGTGCGGGTGCAGGCAACATGCTCACCTTT	TRAC	TRBV7-3	TRBJ2-1	TGTGCCAGCAGCCTTAGCGGGACCGCCTACAATGAGCAGTTCTTC	1	Blood	10860	FALSE	FALSE	FALSE
GCAATCACATTACGAC-1-P190604_Blood_2	clone_P190604:10686:1	P190604	P190604_TRAV4_TGCCTCGTGGGTGACTTGGCTGGTGGTACTAGCTATGGAAAGCTGACATTT_TRAJ52:P190604_TRBV5-6_TGTGCCAGCAGCCCCGTGGGGGAGGACACTGAAGCTTTCTTT_TRBJ1-1	TRAC	TRAV4	TRAJ52	TGCCTCGTGGGTGACTTGGCTGGTGGTACTAGCTATGGAAAGCTGACATTT	TRAC	TRBV5-6	TRBJ1-1	TGTGCCAGCAGCCCCGTGGGGGAGGACACTGAAGCTTTCTTT	1	Blood	10686	FALSE	FALSE	FALSE
GCAATCATCCGAGCCA-1-P190604_Blood_2	clone_P190604:10112:1	P190604	P190604_TRAV21_TGTGCTCTTGATCAAACTGGGGCAAACAACCTCTTCTTT_TRAJ36:P190604_TRBV10-2_TGCGCCAGCAGTCCCGGGACAGGGGGCGCATTCCATGAAAAACTGTTTTTT_TRBJ1-4	TRAC	TRAV21	TRAJ36	TGTGCTCTTGATCAAACTGGGGCAAACAACCTCTTCTTT	TRAC	TRBV10-2	TRBJ1-4	TGCGCCAGCAGTCCCGGGACAGGGGGCGCATTCCATGAAAAACTGTTTTTT	1	Blood	10112	FALSE	FALSE	FALSE
GCACATAGTCGCCATG-1-P190604_Blood_2	clone_P190604:10163:12	P190604	P190604_TRAV21_TGTGCTGTGGAGGATAGCAACTATCAGTTAATCTGG_TRAJ33:P190604_TRBV5-1_TGCGCCAGCCGAGATACCATCGGGACAGACGACTATGGCTACACCTTC_TRBJ1-2	TRAC	TRAV21	TRAJ33	TGTGCTGTGGAGGATAGCAACTATCAGTTAATCTGG	TRAC	TRBV5-1	TRBJ1-2	TGCGCCAGCCGAGATACCATCGGGACAGACGACTATGGCTACACCTTC	12	Blood	10163	TRUE	FALSE	FALSE
GCATACAAGCCACGTC-1-P190604_Blood_2	clone_P190604:10737:1	P190604	P190604_TRAV5_TGTGCAGAGAGGGAAGGTAACACCGACAAGCTCATCTTT_TRAJ34:P190604_TRBV4-1_TGCGCCAGCAGCCTGGGGGGAGGATACGAGCAGTACTTC_TRBJ2-7	TRAC	TRAV5	TRAJ34	TGTGCAGAGAGGGAAGGTAACACCGACAAGCTCATCTTT	TRAC	TRBV4-1	TRBJ2-7	TGCGCCAGCAGCCTGGGGGGAGGATACGAGCAGTACTTC	1	Blood	10737	FALSE	FALSE	FALSE
GCATACATCCAAACTG-1-P190604_Blood_2	clone_P190604:9896:1	P190604	P190604_TRAV17_TGTGCTACGCCGGGTGGTGGTACTAGCTATGGAAAGCTGACATTT_TRAJ52:P190604_TRBV6-2_TGTGCCAGCAGTTTGGTTTTTAGCAATCAGCCCCAGCATTTT_TRBJ1-5	TRAC	TRAV17	TRAJ52	TGTGCTACGCCGGGTGGTGGTACTAGCTATGGAAAGCTGACATTT	TRAC	TRBV6-2	TRBJ1-5	TGTGCCAGCAGTTTGGTTTTTAGCAATCAGCCCCAGCATTTT	1	Blood	9896	FALSE	FALSE	FALSE
GCATGATAGAGCCTAG-1-P190604_Blood_2	clone_P190604:9833:2	P190604	P190604_TRAV14/DV4_TGTGCAATGAGAGAGGGCCCAAACAATGACATGCGCTTT_TRAJ43:P190604_TRBV4-3_TGCGCCAGCAGCCGCGACGGCGTAACAGATACGCAGTATTTT_TRBJ2-3	TRAC	TRAV14/DV4	TRAJ43	TGTGCAATGAGAGAGGGCCCAAACAATGACATGCGCTTT	TRAC	TRBV4-3	TRBJ2-3	TGCGCCAGCAGCCGCGACGGCGTAACAGATACGCAGTATTTT	2	Blood	9833	TRUE	FALSE	FALSE
GCATGATCACGTCTCT-1-P190604_Blood_2	clone_P190604:9816:1	P190604	P190604_TRAV14/DV4_TGTGCAATGAGAGACCCCGGCACTGCCAGTAAACTCACCTTT_TRAJ44:P190604_TRBV6-2_TGTGCCAGCGGGGACAGTTATAGCAATCAGCCCCAGCATTTT_TRBJ1-5	TRAC	TRAV14/DV4	TRAJ44	TGTGCAATGAGAGACCCCGGCACTGCCAGTAAACTCACCTTT	TRAC	TRBV6-2	TRBJ1-5	TGTGCCAGCGGGGACAGTTATAGCAATCAGCCCCAGCATTTT	1	Blood	9816	FALSE	FALSE	FALSE
GCATGCGAGCTATGCT-1-P190604_Blood_2	clone_P190604:10750:1	P190604	P190604_TRAV5_TGTGCAGAGAGTGGGGGTCCGGATAGCAGCTATAAATTGATCTTC_TRAJ12:P190604_TRBV11-2_TGTGCCAGCAGCTTAATTGGGGGACTAGCGGATGAGCAGTTCTTC_TRBJ2-1	TRAC	TRAV5	TRAJ12	TGTGCAGAGAGTGGGGGTCCGGATAGCAGCTATAAATTGATCTTC	TRAC	TRBV11-2	TRBJ2-1	TGTGCCAGCAGCTTAATTGGGGGACTAGCGGATGAGCAGTTCTTC	1	Blood	10750	FALSE	FALSE	FALSE
GCATGCGTCCGCATAA-1-P190604_Blood_2	clone_P190604:10320:1	P190604	P190604_TRAV26-1_TGCATCGTCAGAGTCGTGCATGGAGGAAGCCAAGGAAATCTCATCTTT_TRAJ42:P190604_TRBV7-9_TGTGCCAGCAGCTCCCGTACTAGCGACTCTAGCACAGATACGCAGTATTTT_TRBJ2-3	TRAC	TRAV26-1	TRAJ42	TGCATCGTCAGAGTCGTGCATGGAGGAAGCCAAGGAAATCTCATCTTT	TRAC	TRBV7-9	TRBJ2-3	TGTGCCAGCAGCTCCCGTACTAGCGACTCTAGCACAGATACGCAGTATTTT	1	Blood	10320	FALSE	FALSE	FALSE
GCATGTACAGCCAATT-1-P190604_Blood_2	clone_P190604:11022:2	P190604	P190604_TRAV9-2_TGTGCTCTGAGTGCCGATAACTATGGTCAGAATTTTGTCTTT_TRAJ26:P190604_TRBV18_TGTGCCAGCTCACCGCGGGAAGTCCATAATTCACCCCTCCACTTT_TRBJ1-6	TRAC	TRAV9-2	TRAJ26	TGTGCTCTGAGTGCCGATAACTATGGTCAGAATTTTGTCTTT	TRAC	TRBV18	TRBJ1-6	TGTGCCAGCTCACCGCGGGAAGTCCATAATTCACCCCTCCACTTT	2	Blood	11022	TRUE	FALSE	FALSE
GCCAAATGTTCGTCTC-1-P190604_Blood_2	clone_P190604:10003:1	P190604	P190604_TRAV19_TGTGCTCTGAGTGAGGCGGGGTCTAGCAACACAGGCAAACTAATCTTT_TRAJ37:P190604_TRBV4-2_TGTGCCAGCAGCCAAGATGGGACTAGCGGAATTTATACCTACGAGCAGTACTTC_TRBJ2-7	TRAC	TRAV19	TRAJ37	TGTGCTCTGAGTGAGGCGGGGTCTAGCAACACAGGCAAACTAATCTTT	TRAC	TRBV4-2	TRBJ2-7	TGTGCCAGCAGCCAAGATGGGACTAGCGGAATTTATACCTACGAGCAGTACTTC	1	Blood	10003	FALSE	FALSE	FALSE
GCCTCTAGTAGGCTGA-1-P190604_Blood_2	clone_P190604:10811:1	P190604	P190604_TRAV8-2_TGTGTTGTGAGTGATCGGGCCAATGCAGGCAAATCAACCTTT_TRAJ27:P190604_TRBV3-1_TGTGCCAGCAGCCAAGCCTCAACCGGGGCAGGCTACGAGCAGTACTTC_TRBJ2-7	TRAC	TRAV8-2	TRAJ27	TGTGTTGTGAGTGATCGGGCCAATGCAGGCAAATCAACCTTT	TRAC	TRBV3-1	TRBJ2-7	TGTGCCAGCAGCCAAGCCTCAACCGGGGCAGGCTACGAGCAGTACTTC	1	Blood	10811	FALSE	FALSE	FALSE
GCGACCAAGGTGTGGT-1-P190604_Blood_2	clone_P190604:9517:1	P190604	P190604_TRAV12-1_TGTGTGGTGAACAGCTTTCAGAAACTTGTATTT_TRAJ8:P190604_TRBV12-4_TGTGCCAGCAGGGGACAGGGACAGACCCAGTACTTC_TRBJ2-5	TRAC	TRAV12-1	TRAJ8	TGTGTGGTGAACAGCTTTCAGAAACTTGTATTT	TRAC	TRBV12-4	TRBJ2-5	TGTGCCAGCAGGGGACAGGGACAGACCCAGTACTTC	1	Blood	9517	FALSE	FALSE	FALSE
GCGAGAAAGCGATCCC-1-P190604_Blood_2	clone_P190604:9411:1	P190604	P190604_TRAV1-2_TGTGCTGTGAGAGCTGGGAGCAGTGCTTCCAAGATAATCTTT_TRAJ3:P190604_TRBV28_TGTGCCAGCAGTTTACCCCGGGGCACCTACGAGCAGTACTTC_TRBJ2-7	TRAC	TRAV1-2	TRAJ3	TGTGCTGTGAGAGCTGGGAGCAGTGCTTCCAAGATAATCTTT	TRAC	TRBV28	TRBJ2-7	TGTGCCAGCAGTTTACCCCGGGGCACCTACGAGCAGTACTTC	1	Blood	9411	FALSE	FALSE	FALSE
GCGCAGTCATGCAATC-1-P190604_Blood_2	clone_P190604:11034:1	P190604	P190604_TRAV9-2_TGTGCTCTGATTTTGGATAGCAACTATCAGTTAATCTGG_TRAJ33:P190604_TRBV7-6_TGTGCCAGCAGCTCCGTAGGACAGACGGGCGGCTACACCTTC_TRBJ1-2	TRAC	TRAV9-2	TRAJ33	TGTGCTCTGATTTTGGATAGCAACTATCAGTTAATCTGG	TRAC	TRBV7-6	TRBJ1-2	TGTGCCAGCAGCTCCGTAGGACAGACGGGCGGCTACACCTTC	1	Blood	11034	FALSE	FALSE	FALSE
GCGCCAAGTAGCGTAG-1-P190604_Blood_2	clone_P190604:9442:4	P190604	P190604_TRAV1-2_TGTGCTGTGATGGATAGCAACTATCAGTTAATCTGG_TRAJ33:P190604_TRBV6-4_TGTGCCAGCAGTGACGGGGGCAGCACAGATACGCAGTATTTT_TRBJ2-3	TRAC	TRAV1-2	TRAJ33	TGTGCTGTGATGGATAGCAACTATCAGTTAATCTGG	TRAC	TRBV6-4	TRBJ2-3	TGTGCCAGCAGTGACGGGGGCAGCACAGATACGCAGTATTTT	4	Blood	9442	TRUE	TRUE	FALSE
GCGCGATAGTTCGCAT-1-P190604_Blood_2	clone_P190604:9910:1	P190604	P190604_TRAV17_TGTGCTACGGACGCAAACGACTACAAGCTCAGCTTT_TRAJ20:P190604_TRBV7-9_TGTGCCAGCAGCTTACCGGGGCAGCCCCAGCATTTT_TRBJ1-5	TRAC	TRAV17	TRAJ20	TGTGCTACGGACGCAAACGACTACAAGCTCAGCTTT	TRAC	TRBV7-9	TRBJ1-5	TGTGCCAGCAGCTTACCGGGGCAGCCCCAGCATTTT	1	Blood	9910	FALSE	FALSE	FALSE
GCGCGATGTTATCCGA-1-P190604_Blood_2	clone_P190604:10877:1	P190604	P190604_TRAV8-3_TGTGCTGTGGTGGGTGGTAGTGGAGGTAGCAACTATAAACTGACATTT_TRAJ53:P190604_TRBV5-1_TGCGCCAGCAGTGCCGGGGGTACGGTGCAGTTCTTC_TRBJ2-1	TRAC	TRAV8-3	TRAJ53	TGTGCTGTGGTGGGTGGTAGTGGAGGTAGCAACTATAAACTGACATTT	TRAC	TRBV5-1	TRBJ2-1	TGCGCCAGCAGTGCCGGGGGTACGGTGCAGTTCTTC	1	Blood	10877	FALSE	FALSE	FALSE
GCGGGTTAGTGGTAAT-1-P190604_Blood_2	clone_P190604:9627:1	P190604	P190604_TRAV12-2_TGTGCCGTGAGAGTTACCTCAGGAACCTACAAATACATCTTT_TRAJ40:P190604_TRBV7-6_TGTGCCAGCAGCTTAGAGGTCTCCACAGATACGCAGTATTTT_TRBJ2-3	TRAC	TRAV12-2	TRAJ40	TGTGCCGTGAGAGTTACCTCAGGAACCTACAAATACATCTTT	TRAC	TRBV7-6	TRBJ2-3	TGTGCCAGCAGCTTAGAGGTCTCCACAGATACGCAGTATTTT	1	Blood	9627	FALSE	FALSE	FALSE
GCGGGTTCAGCTTCGG-1-P190604_Blood_2	clone_P190604:9685:1	P190604	P190604_TRAV12-3_TGTGCAATGAGTTACAGCAGTGCTTCCAAGATAATCTTT_TRAJ3:P190604_TRBV20-1_TGCAGTGCTTGGGACAGGGTAGATGAGCAGTTCTTC_TRBJ2-1	TRAC	TRAV12-3	TRAJ3	TGTGCAATGAGTTACAGCAGTGCTTCCAAGATAATCTTT	TRAC	TRBV20-1	TRBJ2-1	TGCAGTGCTTGGGACAGGGTAGATGAGCAGTTCTTC	1	Blood	9685	FALSE	FALSE	FALSE
GCTCCTAAGGACATTA-1-P190604_Blood_2	clone_P190604:9624:1	P190604	P190604_TRAV12-2_TGTGCCGTGACTTCCGGCCTTAACACCGACAAGCTCATCTTT_TRAJ34:P190604_TRBV2_TGTGCCAGCAGCCCAAGCGGTCCATCGGAAGCGGGAGGGCCGGAGGAGACCCAGTACTTC_TRBJ2-5	TRAC	TRAV12-2	TRAJ34	TGTGCCGTGACTTCCGGCCTTAACACCGACAAGCTCATCTTT	TRAC	TRBV2	TRBJ2-5	TGTGCCAGCAGCCCAAGCGGTCCATCGGAAGCGGGAGGGCCGGAGGAGACCCAGTACTTC	1	Blood	9624	FALSE	FALSE	FALSE
GCTCTGTGTCAAAGAT-1-P190604_Blood_2	clone_P190604:9817:3	P190604	P190604_TRAV14/DV4_TGTGCAATGAGAGAGAACAACTTTGGAAATGAGAAATTAACCTTT_TRAJ48:P190604_TRBV15_TGTGCCACCAGTTTACAGGGGGCGCCGAATGAAAAACTGTTTTTT_TRBJ1-4	TRAC	TRAV14/DV4	TRAJ48	TGTGCAATGAGAGAGAACAACTTTGGAAATGAGAAATTAACCTTT	TRAC	TRBV15	TRBJ1-4	TGTGCCACCAGTTTACAGGGGGCGCCGAATGAAAAACTGTTTTTT	3	Blood	9817	TRUE	FALSE	FALSE
GCTGCAGTCCCTCAGT-1-P190604_Blood_2	clone_P190604:9708:1	P190604	P190604_TRAV13-1_TGTGCAGCAAGTAAAGGTGGAGGTAGCAACTATAAACTGACATTT_TRAJ53:P190604_TRBV7-9_TGTGCCAGCAGCGCGACAGGACAGCCCCAGCATTTT_TRBJ1-5	TRAC	TRAV13-1	TRAJ53	TGTGCAGCAAGTAAAGGTGGAGGTAGCAACTATAAACTGACATTT	TRAC	TRBV7-9	TRBJ1-5	TGTGCCAGCAGCGCGACAGGACAGCCCCAGCATTTT	1	Blood	9708	FALSE	FALSE	FALSE
GCTGCTTTCGCATGGC-1-P190604_Blood_2	clone_P190604:9509:1	P190604	P190604_TRAV12-1_TGTGTGGTGAAACAAGTTAGCAACTATCAGTTAATCTGG_TRAJ33:P190604_TRBV7-3_TGTGCCAGCAGCTTAACTGGGACATCTACCGGGGAGCTGTTTTTT_TRBJ2-2	TRAC	TRAV12-1	TRAJ33	TGTGTGGTGAAACAAGTTAGCAACTATCAGTTAATCTGG	TRAC	TRBV7-3	TRBJ2-2	TGTGCCAGCAGCTTAACTGGGACATCTACCGGGGAGCTGTTTTTT	1	Blood	9509	FALSE	FALSE	FALSE
GCTTGAAAGGGATGGG-1-P190604_Blood_2	clone_P190604:10466:1	P190604	P190604_TRAV29/DV5_TGTGCAGCCCTTGCTTCAGATGCTGGTGGTACTAGCTATGGAAAGCTGACATTT_TRAJ52:P190604_TRBV6-4_TGTGCCAGCAGTTACACAACAGGGACTGAAGCTTTCTTT_TRBJ1-1	TRAC	TRAV29/DV5	TRAJ52	TGTGCAGCCCTTGCTTCAGATGCTGGTGGTACTAGCTATGGAAAGCTGACATTT	TRAC	TRBV6-4	TRBJ1-1	TGTGCCAGCAGTTACACAACAGGGACTGAAGCTTTCTTT	1	Blood	10466	FALSE	FALSE	FALSE
GCTTGAATCAAACCAC-1-P190604_Blood_2	clone_P190604:10418:1	P190604	P190604_TRAV29/DV5_TGTGCAGCAAGCGATGGCACCGGTAACCAGTTCTATTTT_TRAJ49:P190604_TRBV7-9_TGTGCCAGCAGCTTAGAGTACACAGATACGCAGTATTTT_TRBJ2-3	TRAC	TRAV29/DV5	TRAJ49	TGTGCAGCAAGCGATGGCACCGGTAACCAGTTCTATTTT	TRAC	TRBV7-9	TRBJ2-3	TGTGCCAGCAGCTTAGAGTACACAGATACGCAGTATTTT	1	Blood	10418	FALSE	FALSE	FALSE
GGAAAGCGTCACTGGC-1-P190604_Blood_2	clone_P190604:10940:1	P190604	P190604_TRAV8-6_TGTGCTGTGAGGCTGGGAGCCCAGAAGCTGGTATTT_TRAJ54:P190604_TRBV6-1_TGTGCCAGCAGCTCGACAGGGGAGGTCACTGAAGCTTTCTTT_TRBJ1-1	TRAC	TRAV8-6	TRAJ54	TGTGCTGTGAGGCTGGGAGCCCAGAAGCTGGTATTT	TRAC	TRBV6-1	TRBJ1-1	TGTGCCAGCAGCTCGACAGGGGAGGTCACTGAAGCTTTCTTT	1	Blood	10940	FALSE	FALSE	FALSE
GGACAAGCACAGCCCA-1-P190604_Blood_2	clone_P190604:10014:1	P190604	P190604_TRAV19_TGTGCTCTGAGTGAGGTCTTTAACAATGCCAGACTCATGTTT_TRAJ31:P190604_TRBV20-1_TGCAGTGCTAGAGTGGGGAGTAGGGCCTACGAGCAGTACTTC_TRBJ2-7	TRAC	TRAV19	TRAJ31	TGTGCTCTGAGTGAGGTCTTTAACAATGCCAGACTCATGTTT	TRAC	TRBV20-1	TRBJ2-7	TGCAGTGCTAGAGTGGGGAGTAGGGCCTACGAGCAGTACTTC	1	Blood	10014	FALSE	FALSE	FALSE
GGACAGATCCCAAGTA-1-P190604_Blood_2	clone_P190604:9691:1	P190604	P190604_TRAV12-3_TGTGCTCCCTCGAACACCGGTAACCAGTTCTATTTT_TRAJ49:P190604_TRBV19_TGTGCCAGTAGTATTAGCAATCAGCCCCAGCATTTT_TRBJ1-5	TRAC	TRAV12-3	TRAJ49	TGTGCTCCCTCGAACACCGGTAACCAGTTCTATTTT	TRAC	TRBV19	TRBJ1-5	TGTGCCAGTAGTATTAGCAATCAGCCCCAGCATTTT	1	Blood	9691	FALSE	FALSE	FALSE
GGACATTAGATGCCTT-1-P190604_Blood_2	clone_P190604:9338:2	P190604	P190604_TRAV1-2_TGTGCTGGGACCTTTCGCGGAGGAAGCCAAGGAAATCTCATCTTT_TRAJ42:P190604_TRBV18_TGTGCCAGCTCACCGTCGACAGGGTACACTGAAGCTTTCTTT_TRBJ1-1	TRAC	TRAV1-2	TRAJ42	TGTGCTGGGACCTTTCGCGGAGGAAGCCAAGGAAATCTCATCTTT	TRAC	TRBV18	TRBJ1-1	TGTGCCAGCTCACCGTCGACAGGGTACACTGAAGCTTTCTTT	2	Blood	9338	TRUE	FALSE	FALSE
GGACATTCAAGCTGAG-1-P190604_Blood_2	clone_P190604:10997:1	P190604	P190604_TRAV9-2_TGTGCTCTGAGTAGTCGAGGAGCCCAGAAGCTGGTATTT_TRAJ54:P190604_TRBV20-1_TGCAGTGCTAGAGATCCTCTCGCGGGACAGGTCTCTGGAAACACCATATATTTT_TRBJ1-3	TRAC	TRAV9-2	TRAJ54	TGTGCTCTGAGTAGTCGAGGAGCCCAGAAGCTGGTATTT	TRAC	TRBV20-1	TRBJ1-3	TGCAGTGCTAGAGATCCTCTCGCGGGACAGGTCTCTGGAAACACCATATATTTT	1	Blood	10997	FALSE	FALSE	FALSE
GGACATTGTAATTGGA-1-P190604_Blood_2	clone_P190604:9960:1	P190604	P190604_TRAV19_TGTGCTACAATAGAAACCAGTGGCTCTAGGTTGACCTTT_TRAJ58:P190604_TRBV27_TGTGCCAGCAGTTCACTGGGACTAGCGGGGTTATACGAGCAGTACTTC_TRBJ2-7	TRAC	TRAV19	TRAJ58	TGTGCTACAATAGAAACCAGTGGCTCTAGGTTGACCTTT	TRAC	TRBV27	TRBJ2-7	TGTGCCAGCAGTTCACTGGGACTAGCGGGGTTATACGAGCAGTACTTC	1	Blood	9960	FALSE	FALSE	FALSE
GGACATTGTTTGGCGC-1-P190604_Blood_2	clone_P190604:9442:4	P190604	P190604_TRAV1-2_TGTGCTGTGATGGATAGCAACTATCAGTTAATCTGG_TRAJ33:P190604_TRBV6-4_TGTGCCAGCAGTGACGGGGGCAGCACAGATACGCAGTATTTT_TRBJ2-3	TRAC	TRAV1-2	TRAJ33	TGTGCTGTGATGGATAGCAACTATCAGTTAATCTGG	TRAC	TRBV6-4	TRBJ2-3	TGTGCCAGCAGTGACGGGGGCAGCACAGATACGCAGTATTTT	4	Blood	9442	TRUE	TRUE	FALSE
GGAGCAACATACGCTA-1-P190604_Blood_2	clone_P190604:10868:1	P190604	P190604_TRAV8-3_TGTGCTGTGGGTGTTCAGGAGAGCAACTATCAGTTAATCTGG_TRAJ33:P190604_TRBV7-9_TGTGCCAGCAGCCGAGCGGCTTACGAGCAGTACTTC_TRBJ2-7	TRAC	TRAV8-3	TRAJ33	TGTGCTGTGGGTGTTCAGGAGAGCAACTATCAGTTAATCTGG	TRAC	TRBV7-9	TRBJ2-7	TGTGCCAGCAGCCGAGCGGCTTACGAGCAGTACTTC	1	Blood	10868	FALSE	FALSE	FALSE
GGAGCAAGTAAGGATT-1-P190604_Blood_2	clone_P190604:9654:1	P190604	P190604_TRAV12-2_TGTGCTCCGGGTCAAGGAAACTTTGGAAATGAGAAATTAACCTTT_TRAJ48:P190604_TRBV28_TGTGCCAGCAGTGGGGTCCTAGCGTTAGCATACGAGCAGTACTTC_TRBJ2-7	TRAC	TRAV12-2	TRAJ48	TGTGCTCCGGGTCAAGGAAACTTTGGAAATGAGAAATTAACCTTT	TRAC	TRBV28	TRBJ2-7	TGTGCCAGCAGTGGGGTCCTAGCGTTAGCATACGAGCAGTACTTC	1	Blood	9654	FALSE	FALSE	FALSE
GGAGCAAGTGAACCTT-1-P190604_Blood_2	clone_P190604:10488:1	P190604	P190604_TRAV3_TGTGCTGTGAGAGAAATAACGAACACAGGCTTTCAGAAACTTGTATTT_TRAJ8:P190604_TRBV29-1_TGCAGCGTTGGGGCAGGGCCGTATAGCAATCAGCCCCAGCATTTT_TRBJ1-5	TRAC	TRAV3	TRAJ8	TGTGCTGTGAGAGAAATAACGAACACAGGCTTTCAGAAACTTGTATTT	TRAC	TRBV29-1	TRBJ1-5	TGCAGCGTTGGGGCAGGGCCGTATAGCAATCAGCCCCAGCATTTT	1	Blood	10488	FALSE	FALSE	FALSE
GGCGACTAGACGCACA-1-P190604_Blood_2	clone_P190604:10642:1	P190604	P190604_TRAV38-2/DV8_TGTGCTTATAGTCCCCAGGCTCAGGGCGGATCTGAAAAGCTGGTCTTT_TRAJ57:P190604_TRBV4-3_TGCGCCAGCAGCCAATGGGTTAGCGGGAGAGGAACAGATACGCAGTATTTT_TRBJ2-3	TRAC	TRAV38-2/DV8	TRAJ57	TGTGCTTATAGTCCCCAGGCTCAGGGCGGATCTGAAAAGCTGGTCTTT	TRAC	TRBV4-3	TRBJ2-3	TGCGCCAGCAGCCAATGGGTTAGCGGGAGAGGAACAGATACGCAGTATTTT	1	Blood	10642	FALSE	FALSE	FALSE
GGCGTGTTCCTAGAAC-1-P190604_Blood_2	clone_P190604:10682:1	P190604	P190604_TRAV4_TGCCTCGTGGGTGACGAATTTTCTGGTGGCTACAATAAGCTGATTTTT_TRAJ4:P190604_TRBV12-3_TGTGCCAGCAGTTACAGGGCTGATTCACCCCTCCACTTT_TRBJ1-6	TRAC	TRAV4	TRAJ4	TGCCTCGTGGGTGACGAATTTTCTGGTGGCTACAATAAGCTGATTTTT	TRAC	TRBV12-3	TRBJ1-6	TGTGCCAGCAGTTACAGGGCTGATTCACCCCTCCACTTT	1	Blood	10682	FALSE	FALSE	FALSE
GGCTGGTTCGCTGATA-1-P190604_Blood_2	clone_P190604:9711:1	P190604	P190604_TRAV13-1_TGTGCAGCAAGTAAGGACTTTGGAAATGAGAAATTAACCTTT_TRAJ48:P190604_TRBV28_TGTGCCAGCAGGGATTGGCCCTCTGGAAACACCATATATTTT_TRBJ1-3	TRAC	TRAV13-1	TRAJ48	TGTGCAGCAAGTAAGGACTTTGGAAATGAGAAATTAACCTTT	TRAC	TRBV28	TRBJ1-3	TGTGCCAGCAGGGATTGGCCCTCTGGAAACACCATATATTTT	1	Blood	9711	FALSE	FALSE	FALSE
GGGAATGGTGCATCTA-1-P190604_Blood_2	clone_P190604:9611:6	P190604	P190604_TRAV12-2_TGTGCCGTGAACGGGGCTTCTGGTTCTGCAAGGCAACTGACCTTT_TRAJ22:P190604_TRBV6-1_TGTGCCAGCACCGGGACAGGGCTTAACGAGCAGTACTTC_TRBJ2-7	TRAC	TRAV12-2	TRAJ22	TGTGCCGTGAACGGGGCTTCTGGTTCTGCAAGGCAACTGACCTTT	TRAC	TRBV6-1	TRBJ2-7	TGTGCCAGCACCGGGACAGGGCTTAACGAGCAGTACTTC	6	Blood	9611	TRUE	FALSE	FALSE
GGGACCTTCCAGATCA-1-P190604_Blood_2	clone_P190604:9539:1	P190604	P190604_TRAV12-1_TGTGTGGTGAACTGGTTTTCTGGTGGCTACAATAAGCTGATTTTT_TRAJ4:P190604_TRBV6-5_TGTGCCAGCAGTCCCGTTCGGGCGGGGACTTACAATGAGCAGTTCTTC_TRBJ2-1	TRAC	TRAV12-1	TRAJ4	TGTGTGGTGAACTGGTTTTCTGGTGGCTACAATAAGCTGATTTTT	TRAC	TRBV6-5	TRBJ2-1	TGTGCCAGCAGTCCCGTTCGGGCGGGGACTTACAATGAGCAGTTCTTC	1	Blood	9539	FALSE	FALSE	FALSE
GGGATGATCGAGCCCA-1-P190604_Blood_2	clone_P190604:9864:1	P190604	P190604_TRAV16_TGTGCTATTTCTAAGTTTACTGGAGCCAATAGTAAGCTGACATTT_TRAJ56:P190604_TRBV2_TGTGCCAGCCGTTTAAAGGCTATCGGCACTGAAGCTTTCTTT_TRBJ1-1	TRAC	TRAV16	TRAJ56	TGTGCTATTTCTAAGTTTACTGGAGCCAATAGTAAGCTGACATTT	TRAC	TRBV2	TRBJ1-1	TGTGCCAGCCGTTTAAAGGCTATCGGCACTGAAGCTTTCTTT	1	Blood	9864	FALSE	FALSE	FALSE
GGGCATCTCCTTAATC-1-P190604_Blood_2	clone_P190604:10651:1	P190604	P190604_TRAV38-2/DV8_TGTGCTTATGTGAAGGGCCCAGGGTTCGGAGGAGGTGCTGACGGACTCACCTTT_TRAJ45:P190604_TRBV18_TGTGCCAGCTCACCACAACAGGGTCACACCATATATTTT_TRBJ1-3	TRAC	TRAV38-2/DV8	TRAJ45	TGTGCTTATGTGAAGGGCCCAGGGTTCGGAGGAGGTGCTGACGGACTCACCTTT	TRAC	TRBV18	TRBJ1-3	TGTGCCAGCTCACCACAACAGGGTCACACCATATATTTT	1	Blood	10651	FALSE	FALSE	FALSE
GGGTCTGCAAGTAATG-1-P190604_Blood_2	clone_P190604:9354:1	P190604	P190604_TRAV1-2_TGTGCTGTGAACAGAGATGACAAGATCATCTTT_TRAJ30:P190604_TRBV7-2_TGTGCCAGCAGCTTAGACTACTCACGAAATGAGCAGTTCTTC_TRBJ2-1	TRAC	TRAV1-2	TRAJ30	TGTGCTGTGAACAGAGATGACAAGATCATCTTT	TRAC	TRBV7-2	TRBJ2-1	TGTGCCAGCAGCTTAGACTACTCACGAAATGAGCAGTTCTTC	1	Blood	9354	FALSE	FALSE	FALSE
GGGTCTGTCGAGGTAG-1-P190604_Blood_2	clone_P190604:9635:1	P190604	P190604_TRAV12-2_TGTGCCGTGGACGAGGGCGGATCTGAAAAGCTGGTCTTT_TRAJ57:P190604_TRBV6-5_TGTGCCAGCAGTTTGACAGGGGGCAATCAGCCCCAGCATTTT_TRBJ1-5	TRAC	TRAV12-2	TRAJ57	TGTGCCGTGGACGAGGGCGGATCTGAAAAGCTGGTCTTT	TRAC	TRBV6-5	TRBJ1-5	TGTGCCAGCAGTTTGACAGGGGGCAATCAGCCCCAGCATTTT	1	Blood	9635	FALSE	FALSE	FALSE
GGTATTGGTACAGTGG-1-P190604_Blood_2	clone_P190604:10514:1	P190604	P190604_TRAV3_TGTGCTGTGAGAGACGGCGGAAGCCAAGGAAATCTCATCTTT_TRAJ42:P190604_TRBV4-3_TGCGCCAGCAGCCAAGAGGCGGGGTGGACAGATACGCAGTATTTT_TRBJ2-3	TRAC	TRAV3	TRAJ42	TGTGCTGTGAGAGACGGCGGAAGCCAAGGAAATCTCATCTTT	TRAC	TRBV4-3	TRBJ2-3	TGCGCCAGCAGCCAAGAGGCGGGGTGGACAGATACGCAGTATTTT	1	Blood	10514	FALSE	FALSE	FALSE
GGTATTGTCTACGAGT-1-P190604_Blood_2	clone_P190604:10170:1	P190604	P190604_TRAV21_TGTGCTGTGGTTAGGGAGGTGGAAACCAGTGGCTCTAGGTTGACCTTT_TRAJ58:P190604_TRBV4-2_TGTGCCAGCAGCCAAGATCCCCTGTTGAGCTCCTACAATGAGCAGTTCTTC_TRBJ2-1	TRAC	TRAV21	TRAJ58	TGTGCTGTGGTTAGGGAGGTGGAAACCAGTGGCTCTAGGTTGACCTTT	TRAC	TRBV4-2	TRBJ2-1	TGTGCCAGCAGCCAAGATCCCCTGTTGAGCTCCTACAATGAGCAGTTCTTC	1	Blood	10170	FALSE	FALSE	FALSE
GGTGAAGGTGGGTATG-1-P190604_Blood_2	clone_P190604:9753:1	P190604	P190604_TRAV13-1_TGTGCAGCATATAACACCGACAAGCTCATCTTT_TRAJ34:P190604_TRBV24-1_TGTGCCACCAGTGATGGCACTGAAGCTTTCTTT_TRBJ1-1	TRAC	TRAV13-1	TRAJ34	TGTGCAGCATATAACACCGACAAGCTCATCTTT	TRAC	TRBV24-1	TRBJ1-1	TGTGCCACCAGTGATGGCACTGAAGCTTTCTTT	1	Blood	9753	FALSE	FALSE	FALSE
GGTGCGTCATGCAATC-1-P190604_Blood_2	clone_P190604:10461:8	P190604	P190604_TRAV29/DV5_TGTGCAGCAGAAGGAGGAGGTGCTGACGGACTCACCTTT_TRAJ45:P190604_TRBV7-8_TGTGCCAGCAGCTTAGTTCCGGAGCGGTCCTCCTACGAGCAGTACTTC_TRBJ2-7	TRAC	TRAV29/DV5	TRAJ45	TGTGCAGCAGAAGGAGGAGGTGCTGACGGACTCACCTTT	TRAC	TRBV7-8	TRBJ2-7	TGTGCCAGCAGCTTAGTTCCGGAGCGGTCCTCCTACGAGCAGTACTTC	8	Blood	10461	TRUE	FALSE	FALSE
GGTGCGTGTGTGACGA-1-P190604_Blood_2	clone_P190604:10213:1	P190604	P190604_TRAV23/DV6_TGTGCAGCAAGCATAGGTAGCAACTATCAGTTAATCTGG_TRAJ33:P190604_TRBV12-3_TGTGCCAGCAGTGATACAGGGGCTCGAGGCTACACCTTC_TRBJ1-2	TRAC	TRAV23/DV6	TRAJ33	TGTGCAGCAAGCATAGGTAGCAACTATCAGTTAATCTGG	TRAC	TRBV12-3	TRBJ1-2	TGTGCCAGCAGTGATACAGGGGCTCGAGGCTACACCTTC	1	Blood	10213	FALSE	FALSE	FALSE
GTAACTGGTGACTACT-1-P190604_Blood_2	clone_P190604:10814:7	P190604	P190604_TRAV8-2_TGTGTTGTGAGTGATGGTTATGGTGGTGCTACAAACAAGCTCATCTTT_TRAJ32:P190604_TRBV5-8_TGTGCCAGCAGCGTGGGGCCTGGGCGGGAGGGCGAAGAGACCCAGTACTTC_TRBJ2-5	TRAC	TRAV8-2	TRAJ32	TGTGTTGTGAGTGATGGTTATGGTGGTGCTACAAACAAGCTCATCTTT	TRAC	TRBV5-8	TRBJ2-5	TGTGCCAGCAGCGTGGGGCCTGGGCGGGAGGGCGAAGAGACCCAGTACTTC	7	Blood	10814	TRUE	FALSE	FALSE
GTACGTAGTATCTGCA-1-P190604_Blood_2	clone_P190604:9681:1	P190604	P190604_TRAV12-3_TGTGCAATGAGCTTTAACACAGGCTTTCAGAAACTTGTATTT_TRAJ8:P190604_TRBV2_TGTGCCAGCAGTAACGCCGGGACTAGCGGGGCCGACGGCCCAGATACGCAGTATTTT_TRBJ2-3	TRAC	TRAV12-3	TRAJ8	TGTGCAATGAGCTTTAACACAGGCTTTCAGAAACTTGTATTT	TRAC	TRBV2	TRBJ2-3	TGTGCCAGCAGTAACGCCGGGACTAGCGGGGCCGACGGCCCAGATACGCAGTATTTT	1	Blood	9681	FALSE	FALSE	FALSE
GTACGTAGTTCAACCA-1-P190604_Blood_2	clone_P190604:9714:1	P190604	P190604_TRAV13-1_TGTGCAGCAAGTACGGGAGGAGGTGCTGACGGACTCACCTTT_TRAJ45:P190604_TRBV11-2_TGTGCCAGCAGCATTGGAGGGGCGTTAGAAGCTTTCTTT_TRBJ1-1	TRAC	TRAV13-1	TRAJ45	TGTGCAGCAAGTACGGGAGGAGGTGCTGACGGACTCACCTTT	TRAC	TRBV11-2	TRBJ1-1	TGTGCCAGCAGCATTGGAGGGGCGTTAGAAGCTTTCTTT	1	Blood	9714	FALSE	FALSE	FALSE
GTACTCCTCTGACCTC-1-P190604_Blood_2	clone_P190604:10043:1	P190604	P190604_TRAV2_TGTGCTGTGGAGGACGAGCGGGGTCAGAATTTTGTCTTT_TRAJ26:P190604_TRBV5-1_TGCGCCAGCAGCTTGGACCTCGACAGAACCTCCTACGAGCAGTACTTC_TRBJ2-7	TRAC	TRAV2	TRAJ26	TGTGCTGTGGAGGACGAGCGGGGTCAGAATTTTGTCTTT	TRAC	TRBV5-1	TRBJ2-7	TGCGCCAGCAGCTTGGACCTCGACAGAACCTCCTACGAGCAGTACTTC	1	Blood	10043	FALSE	FALSE	FALSE
GTACTTTGTAACGTTC-1-P190604_Blood_2	clone_P190604:9979:1	P190604	P190604_TRAV19_TGTGCTCTGAGTCCCACCAATGCAGGCAAATCAACCTTT_TRAJ27:P190604_TRBV11-2_TGTGCCAGCAGCTTAGGACAGGGCTTGGGTGGCAATCAGCCCCAGCATTTT_TRBJ1-5	TRAC	TRAV19	TRAJ27	TGTGCTCTGAGTCCCACCAATGCAGGCAAATCAACCTTT	TRAC	TRBV11-2	TRBJ1-5	TGTGCCAGCAGCTTAGGACAGGGCTTGGGTGGCAATCAGCCCCAGCATTTT	1	Blood	9979	FALSE	FALSE	FALSE
GTAGGCCAGCCACGCT-1-P190604_Blood_2	clone_P190604:10723:1	P190604	P190604_TRAV41_TGTGCTTCAACTAACACCGACAAGCTCATCTTT_TRAJ34:P190604_TRBV6-5_TGTGCCAGCAGCCTCGGTGAAGCTAACTATGGCTACACCTTC_TRBJ1-2	TRAC	TRAV41	TRAJ34	TGTGCTTCAACTAACACCGACAAGCTCATCTTT	TRAC	TRBV6-5	TRBJ1-2	TGTGCCAGCAGCCTCGGTGAAGCTAACTATGGCTACACCTTC	1	Blood	10723	FALSE	FALSE	FALSE
GTAGGCCCATCGACGC-1-P190604_Blood_2	clone_P190604:9982:1	P190604	P190604_TRAV19_TGTGCTCTGAGTGAGAAGGCGGTTAACAATGACATGCGCTTT_TRAJ43:P190604_TRBV28_TGTGCCAGCAGTTTATCAGGGGCCGGGGAGCTGTTTTTT_TRBJ2-2	TRAC	TRAV19	TRAJ43	TGTGCTCTGAGTGAGAAGGCGGTTAACAATGACATGCGCTTT	TRAC	TRBV28	TRBJ2-2	TGTGCCAGCAGTTTATCAGGGGCCGGGGAGCTGTTTTTT	1	Blood	9982	FALSE	FALSE	FALSE
GTATCTTAGGACGAAA-1-P190604_Blood_2	clone_P190604:10173:1	P190604	P190604_TRAV21_TGTGCTGTGTCTTGGGGAAACACACCTCTTGTCTTT_TRAJ29:P190604_TRBV10-2_TGCGCCAGCACTGGACTAGGGGGCCAAGAGACCCAGTACTTC_TRBJ2-5	TRAC	TRAV21	TRAJ29	TGTGCTGTGTCTTGGGGAAACACACCTCTTGTCTTT	TRAC	TRBV10-2	TRBJ2-5	TGCGCCAGCACTGGACTAGGGGGCCAAGAGACCCAGTACTTC	1	Blood	10173	FALSE	FALSE	FALSE
GTATCTTTCAGTTAGC-1-P190604_Blood_2	clone_P190604:10178:1	P190604	P190604_TRAV21_TGTGCTGTTGCCTTTTATAACCAGGGAGGAAAGCTTATCTTC_TRAJ23:P190604_TRBV6-2_TGTGCCAGCAGTTTTTCTAGCGGGAGGGCCAGGGAGACCCAGTACTTC_TRBJ2-5	TRAC	TRAV21	TRAJ23	TGTGCTGTTGCCTTTTATAACCAGGGAGGAAAGCTTATCTTC	TRAC	TRBV6-2	TRBJ2-5	TGTGCCAGCAGTTTTTCTAGCGGGAGGGCCAGGGAGACCCAGTACTTC	1	Blood	10178	FALSE	FALSE	FALSE
GTATTCTGTAGGGTAC-1-P190604_Blood_2	clone_P190604:9550:1	P190604	P190604_TRAV12-1_TGTGTGGTGAGGTACAACTTCAACAAATTTTACTTT_TRAJ21:P190604_TRBV20-1_TGCAGTGCTAGAGAACTGTTACCGGGACAGGTCGTCAAAAACATTCAGTACTTC_TRBJ2-4	TRAC	TRAV12-1	TRAJ21	TGTGTGGTGAGGTACAACTTCAACAAATTTTACTTT	TRAC	TRBV20-1	TRBJ2-4	TGCAGTGCTAGAGAACTGTTACCGGGACAGGTCGTCAAAAACATTCAGTACTTC	1	Blood	9550	FALSE	FALSE	FALSE
GTCAAGTAGTGTTGAA-1-P190604_Blood_2	clone_P190604:10421:60	P190604	P190604_TRAV29/DV5_TGTGCAGCAAGCGCCCATAGTGGAGGTAGCAACTATAAACTGACATTT_TRAJ53:P190604_TRBV7-9_TGTGCCACCAGATTAGGGTACGAGCAGTACTTC_TRBJ2-7	TRAC	TRAV29/DV5	TRAJ53	TGTGCAGCAAGCGCCCATAGTGGAGGTAGCAACTATAAACTGACATTT	TRAC	TRBV7-9	TRBJ2-7	TGTGCCACCAGATTAGGGTACGAGCAGTACTTC	60	Blood	10421	TRUE	FALSE	FALSE
GTCAAGTGTACCCAAT-1-P190604_Blood_2	clone_P190604:10323:1	P190604	P190604_TRAV26-1_TGCATCGTCAGATTCCCTCCTCAGGGCGGATCTGAAAAGCTGGTCTTT_TRAJ57:P190604_TRBV7-3_TGTGCCAGCAGCTTAAGAGGGAGGGGTACCGGGGAGCTGTTTTTT_TRBJ2-2	TRAC	TRAV26-1	TRAJ57	TGCATCGTCAGATTCCCTCCTCAGGGCGGATCTGAAAAGCTGGTCTTT	TRAC	TRBV7-3	TRBJ2-2	TGTGCCAGCAGCTTAAGAGGGAGGGGTACCGGGGAGCTGTTTTTT	1	Blood	10323	FALSE	FALSE	FALSE
GTCAAGTGTTGTCTTT-1-P190604_Blood_2	clone_P190604:9757:1	P190604	P190604_TRAV13-1_TGTGCAGCTACTGGCTCTAGCAACACAGGCAAACTAATCTTT_TRAJ37:P190604_TRBV7-6_TGTGCCAGCAGCATTGACAGGGGAAACACTGAAGCTTTCTTT_TRBJ1-1	TRAC	TRAV13-1	TRAJ37	TGTGCAGCTACTGGCTCTAGCAACACAGGCAAACTAATCTTT	TRAC	TRBV7-6	TRBJ1-1	TGTGCCAGCAGCATTGACAGGGGAAACACTGAAGCTTTCTTT	1	Blood	9757	FALSE	FALSE	FALSE
GTCACAACATTAGGCT-1-P190604_Blood_2	clone_P190604:10848:10	P190604	P190604_TRAV8-3_TGTGCTGTGGGTCCCGTCGACTTTGGAAATGAGAAATTAACCTTT_TRAJ48:P190604_TRBV27_TGTGCCAGCAGTTCAGGCACAGATACGCAGTATTTT_TRBJ2-3	TRAC	TRAV8-3	TRAJ48	TGTGCTGTGGGTCCCGTCGACTTTGGAAATGAGAAATTAACCTTT	TRAC	TRBV27	TRBJ2-3	TGTGCCAGCAGTTCAGGCACAGATACGCAGTATTTT	10	Blood	10848	TRUE	FALSE	FALSE
GTCACGGCACATCCGG-1-P190604_Blood_2	clone_P190604:10789:1	P190604	P190604_TRAV8-1_TGTGCCGTGAGGGGAAACCAGGCAGGAACTGCTCTGATCTTT_TRAJ15:P190604_TRBV6-9_TGTGCCAGCAGTTTTGACAGGGGGGGGAAGTCCAATCAGCCCCAGCATTTT_TRBJ1-5	TRAC	TRAV8-1	TRAJ15	TGTGCCGTGAGGGGAAACCAGGCAGGAACTGCTCTGATCTTT	TRAC	TRBV6-9	TRBJ1-5	TGTGCCAGCAGTTTTGACAGGGGGGGGAAGTCCAATCAGCCCCAGCATTTT	1	Blood	10789	FALSE	FALSE	FALSE
GTCATTTGTACAGCAG-1-P190604_Blood_2	clone_P190604:9825:1	P190604	P190604_TRAV14/DV4_TGTGCAATGAGAGAGGCCCTGAATGCAGGCAACATGCTCACCTTT_TRAJ39:P190604_TRBV5-5_TGTGCCAGCAGCTTGGGGTCTCAGCGCTACGAGCAGTACTTC_TRBJ2-7	TRAC	TRAV14/DV4	TRAJ39	TGTGCAATGAGAGAGGCCCTGAATGCAGGCAACATGCTCACCTTT	TRAC	TRBV5-5	TRBJ2-7	TGTGCCAGCAGCTTGGGGTCTCAGCGCTACGAGCAGTACTTC	1	Blood	9825	FALSE	FALSE	FALSE
GTCGGGTGTGAGGGTT-1-P190604_Blood_2	clone_P190604:9860:1	P190604	P190604_TRAV14/DV4_TGTGCAATGAGTATTAGTACTAGCTATGGAAAGCTGACATTT_TRAJ52:P190604_TRBV19_TGTGCCAGTAGTATTGCCGCGGGAGTACGCGGGGAGCTGTTTTTT_TRBJ2-2	TRAC	TRAV14/DV4	TRAJ52	TGTGCAATGAGTATTAGTACTAGCTATGGAAAGCTGACATTT	TRAC	TRBV19	TRBJ2-2	TGTGCCAGTAGTATTGCCGCGGGAGTACGCGGGGAGCTGTTTTTT	1	Blood	9860	FALSE	FALSE	FALSE
GTGAAGGGTGTGACCC-1-P190604_Blood_2	clone_P190604:10660:1	P190604	P190604_TRAV39_TGTGCCGTGGCAAGCTTTGGAAATGAGAAATTAACCTTT_TRAJ48:P190604_TRBV27_TGTGCCAGCAGTCTCCGACAGGTTCAGAAGGAGGAGCAGTACTTC_TRBJ2-7	TRAC	TRAV39	TRAJ48	TGTGCCGTGGCAAGCTTTGGAAATGAGAAATTAACCTTT	TRAC	TRBV27	TRBJ2-7	TGTGCCAGCAGTCTCCGACAGGTTCAGAAGGAGGAGCAGTACTTC	1	Blood	10660	FALSE	FALSE	FALSE
GTGAAGGTCCTCAACC-1-P190604_Blood_2	clone_P190604:10210:1	P190604	P190604_TRAV23/DV6_TGTGCAGCAAGCAGGGACGACTACAAGCTCAGCTTT_TRAJ20:P190604_TRBV7-9_TGTGCCAGCAGCTCCCCTCTTGGCAATGAGCAGTTCTTC_TRBJ2-1	TRAC	TRAV23/DV6	TRAJ20	TGTGCAGCAAGCAGGGACGACTACAAGCTCAGCTTT	TRAC	TRBV7-9	TRBJ2-1	TGTGCCAGCAGCTCCCCTCTTGGCAATGAGCAGTTCTTC	1	Blood	10210	FALSE	FALSE	FALSE
GTGCAGCCAGATGAGC-1-P190604_Blood_2	clone_P190604:10511:1	P190604	P190604_TRAV3_TGTGCTGTGAGAGACGACTCTGGGGCTGGGAGTTACCAACTCACTTTC_TRAJ28:P190604_TRBV28_TGTGCCAGCAGTTCTCCTGGGAGCAGGACCAACTATGGCTACACCTTC_TRBJ1-2	TRAC	TRAV3	TRAJ28	TGTGCTGTGAGAGACGACTCTGGGGCTGGGAGTTACCAACTCACTTTC	TRAC	TRBV28	TRBJ1-2	TGTGCCAGCAGTTCTCCTGGGAGCAGGACCAACTATGGCTACACCTTC	1	Blood	10511	FALSE	FALSE	FALSE
GTGCAGCTCACTCCTG-1-P190604_Blood_2	clone_P190604:10729:2	P190604	P190604_TRAV5_TGTGCAGAGAGAGGCTCCTCAGGAACCTACAAATACATCTTT_TRAJ40:P190604_TRBV3-1_TGTGCCAGCAGCCCAGCTCCGGACAGAGGAAACACCATATATTTT_TRBJ1-3	TRAC	TRAV5	TRAJ40	TGTGCAGAGAGAGGCTCCTCAGGAACCTACAAATACATCTTT	TRAC	TRBV3-1	TRBJ1-3	TGTGCCAGCAGCCCAGCTCCGGACAGAGGAAACACCATATATTTT	2	Blood	10729	TRUE	FALSE	FALSE
GTGCATAAGTCCATAC-1-P190604_Blood_2	clone_P190604:10378:1	P190604	P190604_TRAV27_TGTGCAGGAGCGCCCCGGTCTGGGGCAAACAACCTCTTCTTT_TRAJ36:P190604_TRBV28_TGTGCCAGCAGGTTACGCGACAGGGTGGCTGAAGCTTTCTTT_TRBJ1-1	TRAC	TRAV27	TRAJ36	TGTGCAGGAGCGCCCCGGTCTGGGGCAAACAACCTCTTCTTT	TRAC	TRBV28	TRBJ1-1	TGTGCCAGCAGGTTACGCGACAGGGTGGCTGAAGCTTTCTTT	1	Blood	10378	FALSE	FALSE	FALSE
GTGCATAGTTGGTAAA-1-P190604_Blood_2	clone_P190604:10678:1	P190604	P190604_TRAV4_TGCCTCGTGGGTGACATAGGGGAGGCCAGAGATGACAAGATCATCTTT_TRAJ30:P190604_TRBV7-2_TGTGCCAGCAGCTTAGCGACTAGCGGTTTCCTACGAGAACAGTACTTC_TRBJ2-7	TRAC	TRAV4	TRAJ30	TGCCTCGTGGGTGACATAGGGGAGGCCAGAGATGACAAGATCATCTTT	TRAC	TRBV7-2	TRBJ2-7	TGTGCCAGCAGCTTAGCGACTAGCGGTTTCCTACGAGAACAGTACTTC	1	Blood	10678	FALSE	FALSE	FALSE
GTGCGGTAGTACATGA-1-P190604_Blood_2	clone_P190604:10730:1	P190604	P190604_TRAV5_TGTGCAGAGAGATCCAATAACAATGACATGCGCTTT_TRAJ43:P190604_TRBV30_TGTGCCTGGAGTTCCCAGAACATTAACTATGGCTACACCTTC_TRBJ1-2	TRAC	TRAV5	TRAJ43	TGTGCAGAGAGATCCAATAACAATGACATGCGCTTT	TRAC	TRBV30	TRBJ1-2	TGTGCCTGGAGTTCCCAGAACATTAACTATGGCTACACCTTC	1	Blood	10730	FALSE	FALSE	FALSE
GTGCGGTCACCTATCC-1-P190604_Blood_2	clone_P190604:10960:1	P190604	P190604_TRAV8-6_TGTGCTGTGAGTGTGGTGCTTCAGGGAGCCCAGAAGCTGGTATTT_TRAJ54:P190604_TRBV18_TGTGCCAGCTCAAGGGACTGGCAAGAGACCCAGTACTTC_TRBJ2-5	TRAC	TRAV8-6	TRAJ54	TGTGCTGTGAGTGTGGTGCTTCAGGGAGCCCAGAAGCTGGTATTT	TRAC	TRBV18	TRBJ2-5	TGTGCCAGCTCAAGGGACTGGCAAGAGACCCAGTACTTC	1	Blood	10960	FALSE	FALSE	FALSE
GTGCGGTGTCAAAGAT-1-P190604_Blood_2	clone_P190604:9704:1	P190604	P190604_TRAV13-1_TGTGCAGCAAGGCAATTTGGAAATGAGAAATTAACCTTT_TRAJ48:P190604_TRBV11-1_TGTGCCAGCGGTCAGGGAGTAGCCGGGGAGCTGTTTTTT_TRBJ2-2	TRAC	TRAV13-1	TRAJ48	TGTGCAGCAAGGCAATTTGGAAATGAGAAATTAACCTTT	TRAC	TRBV11-1	TRBJ2-2	TGTGCCAGCGGTCAGGGAGTAGCCGGGGAGCTGTTTTTT	1	Blood	9704	FALSE	FALSE	FALSE
GTGCTTCCATTATCTC-1-P190604_Blood_2	clone_P190604:10152:1	P190604	P190604_TRAV21_TGTGCTGTGAGGCGAAGTTGGACTGGGGCAAACAACCTCTTCTTT_TRAJ36:P190604_TRBV19_TGTGCCAGTAGTATGAGGGAGAATGAGCAGTTCTTC_TRBJ2-1	TRAC	TRAV21	TRAJ36	TGTGCTGTGAGGCGAAGTTGGACTGGGGCAAACAACCTCTTCTTT	TRAC	TRBV19	TRBJ2-1	TGTGCCAGTAGTATGAGGGAGAATGAGCAGTTCTTC	1	Blood	10152	FALSE	FALSE	FALSE
GTGGGTCGTTTACTCT-1-P190604_Blood_2	clone_P190604:9602:5	P190604	P190604_TRAV12-2_TGTGCCGTGAACCTCTTCCTTTATGGTGGTGCTACAAACAAGCTCATCTTT_TRAJ32:P190604_TRBV6-2_TGTGCCAGCAGTTACATACCCAGGGAAACCTACGAGCAGTACTTC_TRBJ2-7	TRAC	TRAV12-2	TRAJ32	TGTGCCGTGAACCTCTTCCTTTATGGTGGTGCTACAAACAAGCTCATCTTT	TRAC	TRBV6-2	TRBJ2-7	TGTGCCAGCAGTTACATACCCAGGGAAACCTACGAGCAGTACTTC	5	Blood	9602	TRUE	FALSE	FALSE
GTGTTAGTCGCCCTTA-1-P190604_Blood_2	clone_P190604:10556:1	P190604	P190604_TRAV30_TGCGGCACAGAGGGGGCTGACGACTACAAGCTCAGCTTT_TRAJ20:P190604_TRBV28_TGTGCCAGCAGTTTAGGACAGGGGGCGCGTGGCTACACCTTC_TRBJ1-2	TRAC	TRAV30	TRAJ20	TGCGGCACAGAGGGGGCTGACGACTACAAGCTCAGCTTT	TRAC	TRBV28	TRBJ1-2	TGTGCCAGCAGTTTAGGACAGGGGGCGCGTGGCTACACCTTC	1	Blood	10556	FALSE	FALSE	FALSE
GTTAAGCAGCAGGTCA-1-P190604_Blood_2	clone_P190604:9570:1	P190604	P190604_TRAV12-2_TGTGCCGCCCTCCTCTCAGGAACCTACAAATACATCTTT_TRAJ40:P190604_TRBV25-1_TGTGCCAGCAGCGGTAACACTGAAGCTTTCTTT_TRBJ1-1	TRAC	TRAV12-2	TRAJ40	TGTGCCGCCCTCCTCTCAGGAACCTACAAATACATCTTT	TRAC	TRBV25-1	TRBJ1-1	TGTGCCAGCAGCGGTAACACTGAAGCTTTCTTT	1	Blood	9570	FALSE	FALSE	FALSE
GTTACAGAGATGCCAG-1-P190604_Blood_2	clone_P190604:10508:1	P190604	P190604_TRAV3_TGTGCTGTGAGAGACCGGATAAGTGGAGGCTTCAAAACTATCTTT_TRAJ9:P190604_TRBV4-3_TGCGCCAGCAGCCAAGATGCTCCTCGGGAGCAGGACTCCTACGAGCAGTACTTC_TRBJ2-7	TRAC	TRAV3	TRAJ9	TGTGCTGTGAGAGACCGGATAAGTGGAGGCTTCAAAACTATCTTT	TRAC	TRBV4-3	TRBJ2-7	TGCGCCAGCAGCCAAGATGCTCCTCGGGAGCAGGACTCCTACGAGCAGTACTTC	1	Blood	10508	FALSE	FALSE	FALSE
GTTACAGTCTCTGTCG-1-P190604_Blood_2	clone_P190604:10119:1	P190604	P190604_TRAV21_TGTGCTGGTAATGGAGGAAGCCAAGGAAATCTCATCTTT_TRAJ42:P190604_TRBV5-4_TGTGCCAGCAGGGAAAGGGCGGGTATGGGCTCCTACAATGAGCAGTTCTTC_TRBJ2-1	TRAC	TRAV21	TRAJ42	TGTGCTGGTAATGGAGGAAGCCAAGGAAATCTCATCTTT	TRAC	TRBV5-4	TRBJ2-1	TGTGCCAGCAGGGAAAGGGCGGGTATGGGCTCCTACAATGAGCAGTTCTTC	1	Blood	10119	FALSE	FALSE	FALSE
GTTCATTTCACGCATA-1-P190604_Blood_2	clone_P190604:10848:10	P190604	P190604_TRAV8-3_TGTGCTGTGGGTCCCGTCGACTTTGGAAATGAGAAATTAACCTTT_TRAJ48:P190604_TRBV27_TGTGCCAGCAGTTCAGGCACAGATACGCAGTATTTT_TRBJ2-3	TRAC	TRAV8-3	TRAJ48	TGTGCTGTGGGTCCCGTCGACTTTGGAAATGAGAAATTAACCTTT	TRAC	TRBV27	TRBJ2-3	TGTGCCAGCAGTTCAGGCACAGATACGCAGTATTTT	10	Blood	10848	TRUE	FALSE	FALSE
TAAACCGCAGCGTAAG-1-P190604_Blood_2	clone_P190604:10873:1	P190604	P190604_TRAV8-3_TGTGCTGTGGTCGCGTTCTATGGGAACAACAGACTCGCTTTT_TRAJ7:P190604_TRBV14_TGTGCCAGCAGTCGGACAGACCAAAACATTCAGTACTTC_TRBJ2-4	TRAC	TRAV8-3	TRAJ7	TGTGCTGTGGTCGCGTTCTATGGGAACAACAGACTCGCTTTT	TRAC	TRBV14	TRBJ2-4	TGTGCCAGCAGTCGGACAGACCAAAACATTCAGTACTTC	1	Blood	10873	FALSE	FALSE	FALSE
TAAGTGCGTACCGCTG-1-P190604_Blood_2	clone_P190604:10635:1	P190604	P190604_TRAV38-2/DV8_TGTGCTTATAGGAGCTACATATCTAACTTTGGAAATGAGAAATTAACCTTT_TRAJ48:P190604_TRBV2_TGTGCCAGCAGAACACAGGGTGCGAATTCACCCCTCCACTTT_TRBJ1-6	TRAC	TRAV38-2/DV8	TRAJ48	TGTGCTTATAGGAGCTACATATCTAACTTTGGAAATGAGAAATTAACCTTT	TRAC	TRBV2	TRBJ1-6	TGTGCCAGCAGAACACAGGGTGCGAATTCACCCCTCCACTTT	1	Blood	10635	FALSE	FALSE	FALSE
TACACGAAGCTGGAAC-1-P190604_Blood_2	clone_P190604:9491:1	P190604	P190604_TRAV10_TGTGTGGTGAGCGAAAGAGGCTCAACCCTGGGGAGGCTATACTTT_TRAJ18:P190604_TRBV19_TGTGCCACACACAGGGGGACAGGTAGTGATCTGGTCAATGAGCAGTTCTTC_TRBJ2-1	TRAC	TRAV10	TRAJ18	TGTGTGGTGAGCGAAAGAGGCTCAACCCTGGGGAGGCTATACTTT	TRAC	TRBV19	TRBJ2-1	TGTGCCACACACAGGGGGACAGGTAGTGATCTGGTCAATGAGCAGTTCTTC	1	Blood	9491	FALSE	FALSE	TRUE
TACACGAGTCTTCGTC-1-P190604_Blood_2	clone_P190604:10352:1	P190604	P190604_TRAV26-2_TGCATCCTGAGTCCTAACACCGACAAGCTCATCTTT_TRAJ34:P190604_TRBV5-1_TGCGCCAGCAGCTTTCTAGCGGGAGGAGGAGAGACCCAGTACTTC_TRBJ2-5	TRAC	TRAV26-2	TRAJ34	TGCATCCTGAGTCCTAACACCGACAAGCTCATCTTT	TRAC	TRBV5-1	TRBJ2-5	TGCGCCAGCAGCTTTCTAGCGGGAGGAGGAGAGACCCAGTACTTC	1	Blood	10352	FALSE	FALSE	FALSE
TACAGTGAGCTAGTCT-1-P190604_Blood_2	clone_P190604:9941:1	P190604	P190604_TRAV17_TGTGCTACGGGCTCCCTGGGGGGAAATGAGAAATTAACCTTT_TRAJ48:P190604_TRBV10-3_TGTGCCATCGGGACTAGCGGGAGCTCCTACGAGCAGTACTTC_TRBJ2-7	TRAC	TRAV17	TRAJ48	TGTGCTACGGGCTCCCTGGGGGGAAATGAGAAATTAACCTTT	TRAC	TRBV10-3	TRBJ2-7	TGTGCCATCGGGACTAGCGGGAGCTCCTACGAGCAGTACTTC	1	Blood	9941	FALSE	FALSE	FALSE
TACAGTGTCTGTCCGT-1-P190604_Blood_2	clone_P190604:9961:1	P190604	P190604_TRAV19_TGTGCTCCCACGGGAGGAAGCCAAGGAAATCTCATCTTT_TRAJ42:P190604_TRBV20-1_TGCAGTGCTAGAGATCAGGCTAGCGGGAGGGTCGAGCAGTACTTC_TRBJ2-7	TRAC	TRAV19	TRAJ42	TGTGCTCCCACGGGAGGAAGCCAAGGAAATCTCATCTTT	TRAC	TRBV20-1	TRBJ2-7	TGCAGTGCTAGAGATCAGGCTAGCGGGAGGGTCGAGCAGTACTTC	1	Blood	9961	FALSE	FALSE	FALSE
TACCTATCAGTATCTG-1-P190604_Blood_2	clone_P190604:10302:1	P190604	P190604_TRAV26-1_TGCATCGTCAGAGCCTCCGATTCAGGAAACACACCTCTTGTCTTT_TRAJ29:P190604_TRBV12-3_TGTGCCAGCAGTTTATTTCTAGGGGCCCCCAACACCGGGGAGCTGTTTTTT_TRBJ2-2	TRAC	TRAV26-1	TRAJ29	TGCATCGTCAGAGCCTCCGATTCAGGAAACACACCTCTTGTCTTT	TRAC	TRBV12-3	TRBJ2-2	TGTGCCAGCAGTTTATTTCTAGGGGCCCCCAACACCGGGGAGCTGTTTTTT	1	Blood	10302	FALSE	FALSE	FALSE
TACTCGCAGTTAAGTG-1-P190604_Blood_2	clone_P190604:10338:1	P190604	P190604_TRAV26-2_TGCATCCGGGGGAATAGTGGAGGTAGCAACTATAAACTGACATTT_TRAJ53:P190604_TRBV7-9_TGTGCCAGCAGCCCGACCATTACTAGGTCCGGCTACACCTTC_TRBJ1-2	TRAC	TRAV26-2	TRAJ53	TGCATCCGGGGGAATAGTGGAGGTAGCAACTATAAACTGACATTT	TRAC	TRBV7-9	TRBJ1-2	TGTGCCAGCAGCCCGACCATTACTAGGTCCGGCTACACCTTC	1	Blood	10338	FALSE	FALSE	FALSE
TACTCGCTCGCTAGCG-1-P190604_Blood_2	clone_P190604:10857:1	P190604	P190604_TRAV8-3_TGTGCTGTGGGTGCGGAGTCAGGAGGAGGTGCTGACGGACTCACCTTT_TRAJ45:P190604_TRBV4-1_TGCGCCAGCAGCCTCACCTGGGGTACTGAAGCTTTCTTT_TRBJ1-1	TRAC	TRAV8-3	TRAJ45	TGTGCTGTGGGTGCGGAGTCAGGAGGAGGTGCTGACGGACTCACCTTT	TRAC	TRBV4-1	TRBJ1-1	TGCGCCAGCAGCCTCACCTGGGGTACTGAAGCTTTCTTT	1	Blood	10857	FALSE	FALSE	FALSE
TACTTACCATGCAACT-1-P190604_Blood_2	clone_P190604:10923:1	P190604	P190604_TRAV8-4_TGTGCTGTGAGTGGAAACACCGGTAACCAGTTCTATTTT_TRAJ49:P190604_TRBV2_TGTGCCAGCAGTGCAGGACAGGGGGCTAGAAACATTCAGTACTTC_TRBJ2-4	TRAC	TRAV8-4	TRAJ49	TGTGCTGTGAGTGGAAACACCGGTAACCAGTTCTATTTT	TRAC	TRBV2	TRBJ2-4	TGTGCCAGCAGTGCAGGACAGGGGGCTAGAAACATTCAGTACTTC	1	Blood	10923	FALSE	FALSE	FALSE
TACTTACTCTTCTGGC-1-P190604_Blood_2	clone_P190604:10421:60	P190604	P190604_TRAV29/DV5_TGTGCAGCAAGCGCCCATAGTGGAGGTAGCAACTATAAACTGACATTT_TRAJ53:P190604_TRBV7-9_TGTGCCACCAGATTAGGGTACGAGCAGTACTTC_TRBJ2-7	TRAC	TRAV29/DV5	TRAJ53	TGTGCAGCAAGCGCCCATAGTGGAGGTAGCAACTATAAACTGACATTT	TRAC	TRBV7-9	TRBJ2-7	TGTGCCACCAGATTAGGGTACGAGCAGTACTTC	60	Blood	10421	TRUE	FALSE	FALSE
TACTTGTGTCCTCTTG-1-P190604_Blood_2	clone_P190604:10251:1	P190604	P190604_TRAV24_TGTGCCTTTAACGGCGACTACAAGCTCAGCTTT_TRAJ20:P190604_TRBV19_TGTGCCAGTAGCCTACAGGGATACGAGCAGTACTTC_TRBJ2-7	TRAC	TRAV24	TRAJ20	TGTGCCTTTAACGGCGACTACAAGCTCAGCTTT	TRAC	TRBV19	TRBJ2-7	TGTGCCAGTAGCCTACAGGGATACGAGCAGTACTTC	1	Blood	10251	FALSE	FALSE	FALSE
TAGACCAAGCGACGTA-1-P190604_Blood_2	clone_P190604:10848:10	P190604	P190604_TRAV8-3_TGTGCTGTGGGTCCCGTCGACTTTGGAAATGAGAAATTAACCTTT_TRAJ48:P190604_TRBV27_TGTGCCAGCAGTTCAGGCACAGATACGCAGTATTTT_TRBJ2-3	TRAC	TRAV8-3	TRAJ48	TGTGCTGTGGGTCCCGTCGACTTTGGAAATGAGAAATTAACCTTT	TRAC	TRBV27	TRBJ2-3	TGTGCCAGCAGTTCAGGCACAGATACGCAGTATTTT	10	Blood	10848	TRUE	FALSE	FALSE
TAGACCATCGCCGTGA-1-P190604_Blood_2	clone_P190604:10054:3	P190604	P190604_TRAV2_TGTGCTGTGGAGGATGACAGCAGTGCTTCCAAGATAATCTTT_TRAJ3:P190604_TRBV24-1_TGTGCCACCAGTGATCGAGGGGGGAGCGGGAACAATGAGCAGTTCTTC_TRBJ2-1	TRAC	TRAV2	TRAJ3	TGTGCTGTGGAGGATGACAGCAGTGCTTCCAAGATAATCTTT	TRAC	TRBV24-1	TRBJ2-1	TGTGCCACCAGTGATCGAGGGGGGAGCGGGAACAATGAGCAGTTCTTC	3	Blood	10054	TRUE	FALSE	FALSE
TAGACCATCGGCGGTT-1-P190604_Blood_2	clone_P190604:10848:10	P190604	P190604_TRAV8-3_TGTGCTGTGGGTCCCGTCGACTTTGGAAATGAGAAATTAACCTTT_TRAJ48:P190604_TRBV27_TGTGCCAGCAGTTCAGGCACAGATACGCAGTATTTT_TRBJ2-3	TRAC	TRAV8-3	TRAJ48	TGTGCTGTGGGTCCCGTCGACTTTGGAAATGAGAAATTAACCTTT	TRAC	TRBV27	TRBJ2-3	TGTGCCAGCAGTTCAGGCACAGATACGCAGTATTTT	10	Blood	10848	TRUE	FALSE	FALSE
TAGCCGGAGCAGACTG-1-P190604_Blood_2	clone_P190604:9795:4	P190604	P190604_TRAV13-2_TGTGCAGAGAGTCAATATGCTGGTGGTACTAGCTATGGAAAGCTGACATTT_TRAJ52:P190604_TRBV27_TGTGCCAGCAGTCCCGGGATTAGGACTGAAGCTTTCTTT_TRBJ1-1	TRAC	TRAV13-2	TRAJ52	TGTGCAGAGAGTCAATATGCTGGTGGTACTAGCTATGGAAAGCTGACATTT	TRAC	TRBV27	TRBJ1-1	TGTGCCAGCAGTCCCGGGATTAGGACTGAAGCTTTCTTT	4	Blood	9795	TRUE	FALSE	FALSE
TAGGCATCAAATCCGT-1-P190604_Blood_2	clone_P190604:9831:1	P190604	P190604_TRAV14/DV4_TGTGCAATGAGAGAGGGCCAAGGAACCTCAGGAACCTACAAATACATCTTT_TRAJ40:P190604_TRBV12-3_TGTGCCAGCAGTTTTACTACAAATCAGCCCCAGCATTTT_TRBJ1-5	TRAC	TRAV14/DV4	TRAJ40	TGTGCAATGAGAGAGGGCCAAGGAACCTCAGGAACCTACAAATACATCTTT	TRAC	TRBV12-3	TRBJ1-5	TGTGCCAGCAGTTTTACTACAAATCAGCCCCAGCATTTT	1	Blood	9831	FALSE	FALSE	FALSE
TAGTGGTCACTATCTT-1-P190604_Blood_2	clone_P190604:9843:1	P190604	P190604_TRAV14/DV4_TGTGCAATGAGAGAGGGTCAGAATTTTGTCTTT_TRAJ26:P190604_TRBV19_TGTGCCAGTAGTATAGGTTCCGGAGCAGCCAAAAACATTCAGTACTTC_TRBJ2-4	TRAC	TRAV14/DV4	TRAJ26	TGTGCAATGAGAGAGGGTCAGAATTTTGTCTTT	TRAC	TRBV19	TRBJ2-4	TGTGCCAGTAGTATAGGTTCCGGAGCAGCCAAAAACATTCAGTACTTC	1	Blood	9843	FALSE	FALSE	FALSE
TAGTGGTGTAAATGTG-1-P190604_Blood_2	clone_P190604:10404:1	P190604	P190604_TRAV29/DV5_TGTGCAGCAAGCAAGACCAATGCAGGCAAATCAACCTTT_TRAJ27:P190604_TRBV24-1_TGTGCCACCAGTGACCCATCCCTTAGCGGGAGCTTTTGGAGCACAGATACGCAGTATTTT_TRBJ2-3	TRAC	TRAV29/DV5	TRAJ27	TGTGCAGCAAGCAAGACCAATGCAGGCAAATCAACCTTT	TRAC	TRBV24-1	TRBJ2-3	TGTGCCACCAGTGACCCATCCCTTAGCGGGAGCTTTTGGAGCACAGATACGCAGTATTTT	1	Blood	10404	FALSE	FALSE	FALSE
TAGTTGGCAAGAAGAG-1-P190604_Blood_2	clone_P190604:9797:1	P190604	P190604_TRAV13-2_TGTGCAGAGATCGCTGGTGGTACTAGCTATGGAAAGCTGACATTT_TRAJ52:P190604_TRBV9_TGTGCCAGCAGCGTAGCCCATTACGATACGCAGTATTTT_TRBJ2-3	TRAC	TRAV13-2	TRAJ52	TGTGCAGAGATCGCTGGTGGTACTAGCTATGGAAAGCTGACATTT	TRAC	TRBV9	TRBJ2-3	TGTGCCAGCAGCGTAGCCCATTACGATACGCAGTATTTT	1	Blood	9797	FALSE	FALSE	FALSE
TAGTTGGGTTGTGGCC-1-P190604_Blood_2	clone_P190604:10427:4	P190604	P190604_TRAV29/DV5_TGTGCAGCAAGCGCGAGAACAGGAGGAGGTGCTGACGGACTCACCTTT_TRAJ45:P190604_TRBV9_TGTGCCAGCAGCGGGAGCGGGATTTTAGGCAATGAGCAGTTCTTC_TRBJ2-1	TRAC	TRAV29/DV5	TRAJ45	TGTGCAGCAAGCGCGAGAACAGGAGGAGGTGCTGACGGACTCACCTTT	TRAC	TRBV9	TRBJ2-1	TGTGCCAGCAGCGGGAGCGGGATTTTAGGCAATGAGCAGTTCTTC	4	Blood	10427	TRUE	FALSE	FALSE
TATGCCCGTAGGGACT-1-P190604_Blood_2	clone_P190604:9578:1	P190604	P190604_TRAV12-2_TGTGCCGGGTCGAATTCTGGGGGTTACCAGAAAGTTACCTTT_TRAJ13:P190604_TRBV6-1_TGTGCCAGCATTATGACAGGCGCCTACGAGCAGTACTTC_TRBJ2-7	TRAC	TRAV12-2	TRAJ13	TGTGCCGGGTCGAATTCTGGGGGTTACCAGAAAGTTACCTTT	TRAC	TRBV6-1	TRBJ2-7	TGTGCCAGCATTATGACAGGCGCCTACGAGCAGTACTTC	1	Blood	9578	FALSE	FALSE	FALSE
TATTACCCAGCATGAG-1-P190604_Blood_2	clone_P190604:9442:4	P190604	P190604_TRAV1-2_TGTGCTGTGATGGATAGCAACTATCAGTTAATCTGG_TRAJ33:P190604_TRBV6-4_TGTGCCAGCAGTGACGGGGGCAGCACAGATACGCAGTATTTT_TRBJ2-3	TRAC	TRAV1-2	TRAJ33	TGTGCTGTGATGGATAGCAACTATCAGTTAATCTGG	TRAC	TRBV6-4	TRBJ2-3	TGTGCCAGCAGTGACGGGGGCAGCACAGATACGCAGTATTTT	4	Blood	9442	TRUE	TRUE	FALSE
TATTACCTCGTACGGC-1-P190604_Blood_2	clone_P190604:10636:1	P190604	P190604_TRAV38-2/DV8_TGTGCTTATAGGAGGGCGTTGGACTTTGGAAATGAGAAATTAACCTTT_TRAJ48:P190604_TRBV27_TGTGCCACCAGCCCGTTTGGGGAAGGGACTGAAGCTTTCTTT_TRBJ1-1	TRAC	TRAV38-2/DV8	TRAJ48	TGTGCTTATAGGAGGGCGTTGGACTTTGGAAATGAGAAATTAACCTTT	TRAC	TRBV27	TRBJ1-1	TGTGCCACCAGCCCGTTTGGGGAAGGGACTGAAGCTTTCTTT	1	Blood	10636	FALSE	FALSE	FALSE
TCAACGAGTTCGGCAC-1-P190604_Blood_2	clone_P190604:9526:1	P190604	P190604_TRAV12-1_TGTGTGGTGAACATGGGATCTAGTGGAGGCTTCAAAACTATCTTT_TRAJ9:P190604_TRBV10-1_TGCGCCAGCAGTCCAGGGGGCGGGTACGAGCAGTACTTC_TRBJ2-7	TRAC	TRAV12-1	TRAJ9	TGTGTGGTGAACATGGGATCTAGTGGAGGCTTCAAAACTATCTTT	TRAC	TRBV10-1	TRBJ2-7	TGCGCCAGCAGTCCAGGGGGCGGGTACGAGCAGTACTTC	1	Blood	9526	FALSE	FALSE	FALSE
TCAACGATCGCTAGCG-1-P190604_Blood_2	clone_P190604:10290:1	P190604	P190604_TRAV26-1_TGCATCGCCGTGAACAATAACAATGACATGCGCTTT_TRAJ43:P190604_TRBV12-3_TGTGCCAGCAGTTCACCGGGACAGGGCCAAGGGGCTAGCTACAATGAGCAGTTCTTC_TRBJ2-1	TRAC	TRAV26-1	TRAJ43	TGCATCGCCGTGAACAATAACAATGACATGCGCTTT	TRAC	TRBV12-3	TRBJ2-1	TGTGCCAGCAGTTCACCGGGACAGGGCCAAGGGGCTAGCTACAATGAGCAGTTCTTC	1	Blood	10290	FALSE	FALSE	FALSE
TCAATCTAGAAACCAT-1-P190604_Blood_2	clone_P190604:10416:1	P190604	P190604_TRAV29/DV5_TGTGCAGCAAGCGATAACAATGACATGCGCTTT_TRAJ43:P190604_TRBV28_TGTGCCAGCAGCCGCGGACACTCACACACCTTATTCTATGGCTACACCTTC_TRBJ1-2	TRAC	TRAV29/DV5	TRAJ43	TGTGCAGCAAGCGATAACAATGACATGCGCTTT	TRAC	TRBV28	TRBJ1-2	TGTGCCAGCAGCCGCGGACACTCACACACCTTATTCTATGGCTACACCTTC	1	Blood	10416	FALSE	FALSE	FALSE
TCAATCTAGCGGCTTC-1-P190604_Blood_2	clone_P190604:9988:1	P190604	P190604_TRAV19_TGTGCTCTGAGTGAGCTTTCTGGTTCTGCAAGGCAACTGACCTTT_TRAJ22:P190604_TRBV6-2_TGTGCCAGCAGTTACGAGGGCCCGCGGGGCAATCAGCCCCAGCATTTT_TRBJ1-5	TRAC	TRAV19	TRAJ22	TGTGCTCTGAGTGAGCTTTCTGGTTCTGCAAGGCAACTGACCTTT	TRAC	TRBV6-2	TRBJ1-5	TGTGCCAGCAGTTACGAGGGCCCGCGGGGCAATCAGCCCCAGCATTTT	1	Blood	9988	FALSE	FALSE	FALSE
TCAATCTAGGCGTACA-1-P190604_Blood_2	clone_P190604:10336:1	P190604	P190604_TRAV26-1_TGCATCGTTTCGACGGGAGGAGGAAACAAACTCACCTTT_TRAJ10:P190604_TRBV28_TGTGCCAGCAGCCTAACCAGGGGAAGTGGCACTGAAGCTTTCTTT_TRBJ1-1	TRAC	TRAV26-1	TRAJ10	TGCATCGTTTCGACGGGAGGAGGAAACAAACTCACCTTT	TRAC	TRBV28	TRBJ1-1	TGTGCCAGCAGCCTAACCAGGGGAAGTGGCACTGAAGCTTTCTTT	1	Blood	10336	FALSE	FALSE	FALSE
TCACAAGAGATGTTAG-1-P190604_Blood_2	clone_P190604:10350:1	P190604	P190604_TRAV26-2_TGCATCCTGAGAGTAACTAGCAACACAGGCAAACTAATCTTT_TRAJ37:P190604_TRBV20-1_TGCAGTGCTAGAGATCCTAGCGTGGGGGCCACCTCTGGAAACACCATATATTTT_TRBJ1-3	TRAC	TRAV26-2	TRAJ37	TGCATCCTGAGAGTAACTAGCAACACAGGCAAACTAATCTTT	TRAC	TRBV20-1	TRBJ1-3	TGCAGTGCTAGAGATCCTAGCGTGGGGGCCACCTCTGGAAACACCATATATTTT	1	Blood	10350	FALSE	FALSE	FALSE
TCAGCTCAGTCCCACG-1-P190604_Blood_2	clone_P190604:9932:1	P190604	P190604_TRAV17_TGTGCTACGGAGGGGGCTGGTAACCAGGGAGGAAAGCTTATCTTC_TRAJ23:P190604_TRBV7-2_TGTGCCAGCAATGGGAGGGGACAGGACGTTACGCAGTATTTT_TRBJ2-3	TRAC	TRAV17	TRAJ23	TGTGCTACGGAGGGGGCTGGTAACCAGGGAGGAAAGCTTATCTTC	TRAC	TRBV7-2	TRBJ2-3	TGTGCCAGCAATGGGAGGGGACAGGACGTTACGCAGTATTTT	1	Blood	9932	FALSE	FALSE	FALSE
TCAGGATAGCGTTCCG-1-P190604_Blood_2	clone_P190604:9720:1	P190604	P190604_TRAV13-1_TGTGCAGCAAGTATAAATAACAATGACATGCGCTTT_TRAJ43:P190604_TRBV6-1_TGTGCCAGCAGTGAACTCCCCCAAGAGACCCAGTACTTC_TRBJ2-5	TRAC	TRAV13-1	TRAJ43	TGTGCAGCAAGTATAAATAACAATGACATGCGCTTT	TRAC	TRBV6-1	TRBJ2-5	TGTGCCAGCAGTGAACTCCCCCAAGAGACCCAGTACTTC	1	Blood	9720	FALSE	FALSE	FALSE
TCAGGATCAAGGACAC-1-P190604_Blood_2	clone_P190604:10567:6	P190604	P190604_TRAV34_TGTGGAGCTTCTACCTCAGGAACCTACAAATACATCTTT_TRAJ40:P190604_TRBV7-8_TGTGCCAGCAGTCTTTCCCGGGGTAATGGCTATGGCTACACCTTC_TRBJ1-2	TRAC	TRAV34	TRAJ40	TGTGGAGCTTCTACCTCAGGAACCTACAAATACATCTTT	TRAC	TRBV7-8	TRBJ1-2	TGTGCCAGCAGTCTTTCCCGGGGTAATGGCTATGGCTACACCTTC	6	Blood	10567	TRUE	FALSE	FALSE
TCAGGTACAAAGTGCG-1-P190604_Blood_2	clone_P190604:10983:20	P190604	P190604_TRAV9-2_TGTGCTCTGAGAAATACTGGAGGCTTCAAAACTATCTTT_TRAJ9:P190604_TRBV7-2_TGTGCCAGCAGCTCCGAAGCCAATCAGCCCCAGCATTTT_TRBJ1-5	TRAC	TRAV9-2	TRAJ9	TGTGCTCTGAGAAATACTGGAGGCTTCAAAACTATCTTT	TRAC	TRBV7-2	TRBJ1-5	TGTGCCAGCAGCTCCGAAGCCAATCAGCCCCAGCATTTT	20	Blood	10983	TRUE	FALSE	FALSE
TCATTACAGCCTATGT-1-P190604_Blood_2	clone_P190604:9917:1	P190604	P190604_TRAV17_TGTGCTACGGACGCGAGGAATAACAATGACATGCGCTTT_TRAJ43:P190604_TRBV28_TGTGCCAGCAGGTCCTCCGGGACAGGTTTAAACTCTGGAAACACCATATATTTT_TRBJ1-3	TRAC	TRAV17	TRAJ43	TGTGCTACGGACGCGAGGAATAACAATGACATGCGCTTT	TRAC	TRBV28	TRBJ1-3	TGTGCCAGCAGGTCCTCCGGGACAGGTTTAAACTCTGGAAACACCATATATTTT	1	Blood	9917	FALSE	FALSE	FALSE
TCATTACAGCTCCCAG-1-P190604_Blood_2	clone_P190604:10667:1	P190604	P190604_TRAV4_TGCCTCGTGGAGAGATACAATAACAATGACATGCGCTTT_TRAJ43:P190604_TRBV19_TGTGCCAGTAGCACAGGACCCCCGGAGGTAAACTATGGCTACACCTTC_TRBJ1-2	TRAC	TRAV4	TRAJ43	TGCCTCGTGGAGAGATACAATAACAATGACATGCGCTTT	TRAC	TRBV19	TRBJ1-2	TGTGCCAGTAGCACAGGACCCCCGGAGGTAAACTATGGCTACACCTTC	1	Blood	10667	FALSE	FALSE	FALSE
TCCACACTCTACCAGA-1-P190604_Blood_2	clone_P190604:9413:1	P190604	P190604_TRAV1-2_TGTGCTGTGAGAGTTCGGAACACAGGCAAACTAATCTTT_TRAJ37:P190604_TRBV19_TGTGCCAGTAAACTCGCGGGCAGCGTAAGCACCGGGGAGCTGTTTTTT_TRBJ2-2	TRAC	TRAV1-2	TRAJ37	TGTGCTGTGAGAGTTCGGAACACAGGCAAACTAATCTTT	TRAC	TRBV19	TRBJ2-2	TGTGCCAGTAAACTCGCGGGCAGCGTAAGCACCGGGGAGCTGTTTTTT	1	Blood	9413	FALSE	FALSE	FALSE
TCCCGATTCAGTTAGC-1-P190604_Blood_2	clone_P190604:10234:1	P190604	P190604_TRAV23/DV6_TGTGCAGCGCAGAAGGACAAGATCATCTTT_TRAJ30:P190604_TRBV11-2_TGTGCCAGCAGCTTAGGCCTAGCGGGACCCACAGATACGCAGTATTTT_TRBJ2-3	TRAC	TRAV23/DV6	TRAJ30	TGTGCAGCGCAGAAGGACAAGATCATCTTT	TRAC	TRBV11-2	TRBJ2-3	TGTGCCAGCAGCTTAGGCCTAGCGGGACCCACAGATACGCAGTATTTT	1	Blood	10234	FALSE	FALSE	FALSE
TCGAGGCTCGGATGGA-1-P190604_Blood_2	clone_P190604:9807:1	P190604	P190604_TRAV13-2_TGTGCAGCGCGTCAGGGAGCCCAGAAGCTGGTATTT_TRAJ54:P190604_TRBV11-2_TGTGCCAGCAGCCTAGGGACAGGGCGCGAGCAGTACTTC_TRBJ2-7	TRAC	TRAV13-2	TRAJ54	TGTGCAGCGCGTCAGGGAGCCCAGAAGCTGGTATTT	TRAC	TRBV11-2	TRBJ2-7	TGTGCCAGCAGCCTAGGGACAGGGCGCGAGCAGTACTTC	1	Blood	9807	FALSE	FALSE	FALSE
TCGAGGCTCTCTGTCG-1-P190604_Blood_2	clone_P190604:9321:1	P190604	P190604_TRAV1-2_TGTGCCGTATCTTATAACACCAATGCAGGCAAATCAACCTTT_TRAJ27:P190604_TRBV20-1_TGCAGTGCTAGTGTCACCAACTCTGGAAACACCATATATTTT_TRBJ1-3	TRAC	TRAV1-2	TRAJ27	TGTGCCGTATCTTATAACACCAATGCAGGCAAATCAACCTTT	TRAC	TRBV20-1	TRBJ1-3	TGCAGTGCTAGTGTCACCAACTCTGGAAACACCATATATTTT	1	Blood	9321	FALSE	FALSE	FALSE
TCGCGAGAGTGCAAGC-1-P190604_Blood_2	clone_P190604:9552:1	P190604	P190604_TRAV12-1_TGTGTGGTGATGACTAACGACTACAAGCTCAGCTTT_TRAJ20:P190604_TRBV7-8_TGTGCCAGCAGCTTAGTATCCTATGAGCAGTTCTTC_TRBJ2-1	TRAC	TRAV12-1	TRAJ20	TGTGTGGTGATGACTAACGACTACAAGCTCAGCTTT	TRAC	TRBV7-8	TRBJ2-1	TGTGCCAGCAGCTTAGTATCCTATGAGCAGTTCTTC	1	Blood	9552	FALSE	FALSE	FALSE
TCGCGAGCACATGACT-1-P190604_Blood_2	clone_P190604:9507:1	P190604	P190604_TRAV12-1_TGTGTGGTCCTCAACACCGACAAGCTCATCTTT_TRAJ34:P190604_TRBV14_TGTGCCAGCAGCCTTTTCCAGGGGTACGAGCAGTACTTC_TRBJ2-7	TRAC	TRAV12-1	TRAJ34	TGTGTGGTCCTCAACACCGACAAGCTCATCTTT	TRAC	TRBV14	TRBJ2-7	TGTGCCAGCAGCCTTTTCCAGGGGTACGAGCAGTACTTC	1	Blood	9507	FALSE	FALSE	FALSE
TCGCGAGTCTGATACG-1-P190604_Blood_2	clone_P190604:10421:60	P190604	P190604_TRAV29/DV5_TGTGCAGCAAGCGCCCATAGTGGAGGTAGCAACTATAAACTGACATTT_TRAJ53:P190604_TRBV7-9_TGTGCCACCAGATTAGGGTACGAGCAGTACTTC_TRBJ2-7	TRAC	TRAV29/DV5	TRAJ53	TGTGCAGCAAGCGCCCATAGTGGAGGTAGCAACTATAAACTGACATTT	TRAC	TRBV7-9	TRBJ2-7	TGTGCCACCAGATTAGGGTACGAGCAGTACTTC	60	Blood	10421	TRUE	FALSE	FALSE
TCGCGTTAGACAAAGG-1-P190604_Blood_2	clone_P190604:10785:1	P190604	P190604_TRAV8-1_TGTGCCGTGAATTCAGGATACAGCACCCTCACCTTT_TRAJ11:P190604_TRBV19_TGTGCCAGTAGTATTGGACAGGGGCTAGGGCAGCCCCAGCATTTT_TRBJ1-5	TRAC	TRAV8-1	TRAJ11	TGTGCCGTGAATTCAGGATACAGCACCCTCACCTTT	TRAC	TRBV19	TRBJ1-5	TGTGCCAGTAGTATTGGACAGGGGCTAGGGCAGCCCCAGCATTTT	1	Blood	10785	FALSE	FALSE	FALSE
TCGCGTTAGTGCCATT-1-P190604_Blood_2	clone_P190604:9703:1	P190604	P190604_TRAV13-1_TGTGCAGCAAGATGGGGTACCAACCCCGGCACTGCCAGTAAACTCACCTTT_TRAJ44:P190604_TRBV6-5_TGTGCCAGCAGACTCGGGAATGAGCAGTTCTTC_TRBJ2-1	TRAC	TRAV13-1	TRAJ44	TGTGCAGCAAGATGGGGTACCAACCCCGGCACTGCCAGTAAACTCACCTTT	TRAC	TRBV6-5	TRBJ2-1	TGTGCCAGCAGACTCGGGAATGAGCAGTTCTTC	1	Blood	9703	FALSE	FALSE	FALSE
TCGCGTTGTATCAGTC-1-P190604_Blood_2	clone_P190604:10812:1	P190604	P190604_TRAV8-2_TGTGTTGTGAGTGATGCTGGGGGTTACCAGAAAGTTACCTTT_TRAJ13:P190604_TRBV7-3_TGTGCCAGCAGCATAGGACTAGGAGACAATGAGCAGTTCTTC_TRBJ2-1	TRAC	TRAV8-2	TRAJ13	TGTGTTGTGAGTGATGCTGGGGGTTACCAGAAAGTTACCTTT	TRAC	TRBV7-3	TRBJ2-1	TGTGCCAGCAGCATAGGACTAGGAGACAATGAGCAGTTCTTC	1	Blood	10812	FALSE	FALSE	FALSE
TCGCGTTGTTCCACGG-1-P190604_Blood_2	clone_P190604:9754:1	P190604	P190604_TRAV13-1_TGTGCAGCATTGAATGCTGGCAACAACCGTAAGCTGATTTGG_TRAJ38:P190604_TRBV24-1_TGTGCCACCCAGGGAGCAGGGAGGAATACGCAGTATTTT_TRBJ2-3	TRAC	TRAV13-1	TRAJ38	TGTGCAGCATTGAATGCTGGCAACAACCGTAAGCTGATTTGG	TRAC	TRBV24-1	TRBJ2-3	TGTGCCACCCAGGGAGCAGGGAGGAATACGCAGTATTTT	1	Blood	9754	FALSE	FALSE	FALSE
TCGTACCAGTCGTTTG-1-P190604_Blood_2	clone_P190604:10519:1	P190604	P190604_TRAV3_TGTGCTGTGAGAGACGGTAGTGTTGGAGGCTTCAAAACTATCTTT_TRAJ9:P190604_TRBV9_TGTGCCAGCGATCCTAGCGGGCTCCGAACAGATACGCAGTATTTT_TRBJ2-3	TRAC	TRAV3	TRAJ9	TGTGCTGTGAGAGACGGTAGTGTTGGAGGCTTCAAAACTATCTTT	TRAC	TRBV9	TRBJ2-3	TGTGCCAGCGATCCTAGCGGGCTCCGAACAGATACGCAGTATTTT	1	Blood	10519	FALSE	FALSE	FALSE
TCGTACCCAGGGTACA-1-P190604_Blood_2	clone_P190604:9865:1	P190604	P190604_TRAV16_TGTGCTCCCATGGAGGGTTACCAGAAAGTTACCTTT_TRAJ13:P190604_TRBV19_TGTGCCAGTAGTCGCTCAGGGGGAAGCACCGGGGAGCTGTTTTTT_TRBJ2-2	TRAC	TRAV16	TRAJ13	TGTGCTCCCATGGAGGGTTACCAGAAAGTTACCTTT	TRAC	TRBV19	TRBJ2-2	TGTGCCAGTAGTCGCTCAGGGGGAAGCACCGGGGAGCTGTTTTTT	1	Blood	9865	FALSE	FALSE	FALSE
TCGTACCTCTGTCTAT-1-P190604_Blood_2	clone_P190604:10348:1	P190604	P190604_TRAV26-2_TGCATCCTGAGAGCTCACAGTGGAGGTAGCAACTATAAACTGACATTT_TRAJ53:P190604_TRBV20-1_TGCAGTGCTCGGGCCGGGCTTGCAAATTCACCCCTCCACTTT_TRBJ1-6	TRAC	TRAV26-2	TRAJ53	TGCATCCTGAGAGCTCACAGTGGAGGTAGCAACTATAAACTGACATTT	TRAC	TRBV20-1	TRBJ1-6	TGCAGTGCTCGGGCCGGGCTTGCAAATTCACCCCTCCACTTT	1	Blood	10348	FALSE	FALSE	FALSE
TCGTAGAGTGATGCCC-1-P190604_Blood_2	clone_P190604:10097:1	P190604	P190604_TRAV20_TGTGCTGTGCGGGCCCCGAACACCGGTAACCAGTTCTATTTT_TRAJ49:P190604_TRBV19_TGTGCCAGTAGCTGGACAGGGAATGGCTACACCTTC_TRBJ1-2	TRAC	TRAV20	TRAJ49	TGTGCTGTGCGGGCCCCGAACACCGGTAACCAGTTCTATTTT	TRAC	TRBV19	TRBJ1-2	TGTGCCAGTAGCTGGACAGGGAATGGCTACACCTTC	1	Blood	10097	FALSE	FALSE	FALSE
TCTATTGAGCTAGCCC-1-P190604_Blood_2	clone_P190604:10848:10	P190604	P190604_TRAV8-3_TGTGCTGTGGGTCCCGTCGACTTTGGAAATGAGAAATTAACCTTT_TRAJ48:P190604_TRBV27_TGTGCCAGCAGTTCAGGCACAGATACGCAGTATTTT_TRBJ2-3	TRAC	TRAV8-3	TRAJ48	TGTGCTGTGGGTCCCGTCGACTTTGGAAATGAGAAATTAACCTTT	TRAC	TRBV27	TRBJ2-3	TGTGCCAGCAGTTCAGGCACAGATACGCAGTATTTT	10	Blood	10848	TRUE	FALSE	FALSE
TCTATTGTCACCGGGT-1-P190604_Blood_2	clone_P190604:10274:3	P190604	P190604_TRAV25_TGTGCAGGGCAGGTGCAGGGCGGATCTGAAAAGCTGGTCTTT_TRAJ57:P190604_TRBV4-1_TGCGCCAGCAGCCAAGGGGGGCTCTATGGCTACACCTTC_TRBJ1-2	TRAC	TRAV25	TRAJ57	TGTGCAGGGCAGGTGCAGGGCGGATCTGAAAAGCTGGTCTTT	TRAC	TRBV4-1	TRBJ1-2	TGCGCCAGCAGCCAAGGGGGGCTCTATGGCTACACCTTC	3	Blood	10274	TRUE	FALSE	FALSE
TCTCTAAAGACTAGAT-1-P190604_Blood_2	clone_P190604:9948:1	P190604	P190604_TRAV17_TGTGCTACGGTTGCACAGTCAGGATACAGCACCCTCACCTTT_TRAJ11:P190604_TRBV5-1_TGCGCCAGCAGCAAAACCGGGACTAGCGTCTACAATGAGCAGTTCTTC_TRBJ2-1	TRAC	TRAV17	TRAJ11	TGTGCTACGGTTGCACAGTCAGGATACAGCACCCTCACCTTT	TRAC	TRBV5-1	TRBJ2-1	TGCGCCAGCAGCAAAACCGGGACTAGCGTCTACAATGAGCAGTTCTTC	1	Blood	9948	FALSE	FALSE	FALSE
TCTGGAACAATCGAAA-1-P190604_Blood_2	clone_P190604:10254:1	P190604	P190604_TRAV24_TGTGCCTTTACGGGCTACTCTGGGGCTGGGAGTTACCAACTCACTTTC_TRAJ28:P190604_TRBV28_TGTGCCAGCAGTTTACCAGGTCCTAGCCAAGAGACCCAGTACTTC_TRBJ2-5	TRAC	TRAV24	TRAJ28	TGTGCCTTTACGGGCTACTCTGGGGCTGGGAGTTACCAACTCACTTTC	TRAC	TRBV28	TRBJ2-5	TGTGCCAGCAGTTTACCAGGTCCTAGCCAAGAGACCCAGTACTTC	1	Blood	10254	FALSE	FALSE	FALSE
TCTGGAACAGTGGAGT-1-P190604_Blood_2	clone_P190604:9732:1	P190604	P190604_TRAV13-1_TGTGCAGCAAGTATTGATGACATGCGCTTT_TRAJ43:P190604_TRBV28_TGTGCCAGCAGTTCCCCTCAGGGTTCCGGGGAGCTGTTTTTT_TRBJ2-2	TRAC	TRAV13-1	TRAJ43	TGTGCAGCAAGTATTGATGACATGCGCTTT	TRAC	TRBV28	TRBJ2-2	TGTGCCAGCAGTTCCCCTCAGGGTTCCGGGGAGCTGTTTTTT	1	Blood	9732	FALSE	FALSE	FALSE
TCTGGAACATGGATGG-1-P190604_Blood_2	clone_P190604:10299:2	P190604	P190604_TRAV26-1_TGCATCGTCAGACTTAACAATGCCAGACTCATGTTT_TRAJ31:P190604_TRBV20-1_TGCAGTGCTAGAGAGGACAGGGGGAATTCACCCCTCCACTTT_TRBJ1-6	TRAC	TRAV26-1	TRAJ31	TGCATCGTCAGACTTAACAATGCCAGACTCATGTTT	TRAC	TRBV20-1	TRBJ1-6	TGCAGTGCTAGAGAGGACAGGGGGAATTCACCCCTCCACTTT	2	Blood	10299	TRUE	FALSE	FALSE
TCTGGAAGTAGAAGGA-1-P190604_Blood_2	clone_P190604:9594:1	P190604	P190604_TRAV12-2_TGTGCCGTGAACATGAACAGAGATGACAAGATCATCTTT_TRAJ30:P190604_TRBV27_TGTGCCAGCAGTTCGGGCAGTGAAGCTTTCTTT_TRBJ1-1	TRAC	TRAV12-2	TRAJ30	TGTGCCGTGAACATGAACAGAGATGACAAGATCATCTTT	TRAC	TRBV27	TRBJ1-1	TGTGCCAGCAGTTCGGGCAGTGAAGCTTTCTTT	1	Blood	9594	FALSE	FALSE	FALSE
TCTGGAATCATCTGTT-1-P190604_Blood_2	clone_P190604:9956:1	P190604	P190604_TRAV17_TGTGCTTCAAGGACTGGAGGCTTCAAAACTATCTTT_TRAJ9:P190604_TRBV7-8_TGTGCCAGCAGCTTAGAGAGAGTCGACCTTCTATTCTATGGCTACACCTTC_TRBJ1-2	TRAC	TRAV17	TRAJ9	TGTGCTTCAAGGACTGGAGGCTTCAAAACTATCTTT	TRAC	TRBV7-8	TRBJ1-2	TGTGCCAGCAGCTTAGAGAGAGTCGACCTTCTATTCTATGGCTACACCTTC	1	Blood	9956	FALSE	FALSE	FALSE
TCTTCGGAGACACGAC-1-P190604_Blood_2	clone_P190604:9730:1	P190604	P190604_TRAV13-1_TGTGCAGCAAGTATGTCTGGGGGTTACCAGAAAGTTACCTTT_TRAJ13:P190604_TRBV11-1_TGTGCCAGCAGCTTTACCGGGTACGAGCAGTACTTC_TRBJ2-7	TRAC	TRAV13-1	TRAJ13	TGTGCAGCAAGTATGTCTGGGGGTTACCAGAAAGTTACCTTT	TRAC	TRBV11-1	TRBJ2-7	TGTGCCAGCAGCTTTACCGGGTACGAGCAGTACTTC	1	Blood	9730	FALSE	FALSE	FALSE
TCTTCGGGTAAAGTCA-1-P190604_Blood_2	clone_P190604:10454:1	P190604	P190604_TRAV29/DV5_TGTGCAGCAAGGGACTCAGGAACCTACAAATACATCTTT_TRAJ40:P190604_TRBV7-2_TGTGCCAGCAGACTATCACAGGGGTCGAATCAGCCCCAGCATTTT_TRBJ1-5	TRAC	TRAV29/DV5	TRAJ40	TGTGCAGCAAGGGACTCAGGAACCTACAAATACATCTTT	TRAC	TRBV7-2	TRBJ1-5	TGTGCCAGCAGACTATCACAGGGGTCGAATCAGCCCCAGCATTTT	1	Blood	10454	FALSE	FALSE	FALSE
TGACAACAGTTTCCTT-1-P190604_Blood_2	clone_P190604:10268:1	P190604	P190604_TRAV25_TGTGCAGGGAAAACCTCCTACGACAAGGTGATATTT_TRAJ50:P190604_TRBV25-1_TGTGCCACCTCTGAAGGGTATCAATTGTACTTC_TRBJ2-4	TRAC	TRAV25	TRAJ50	TGTGCAGGGAAAACCTCCTACGACAAGGTGATATTT	TRAC	TRBV25-1	TRBJ2-4	TGTGCCACCTCTGAAGGGTATCAATTGTACTTC	1	Blood	10268	FALSE	FALSE	FALSE
TGACTAGCATCGACGC-1-P190604_Blood_2	clone_P190604:10658:1	P190604	P190604_TRAV39_TGTGCCGTGGACGGCCGCGAGAGAAAGGGTACTAGCTATGGAAAGCTGACATTT_TRAJ52:P190604_TRBV5-4_TGTGCCAGCAGCTTGGACAGGGTTTACGAGCAGTACTTC_TRBJ2-7	TRAC	TRAV39	TRAJ52	TGTGCCGTGGACGGCCGCGAGAGAAAGGGTACTAGCTATGGAAAGCTGACATTT	TRAC	TRBV5-4	TRBJ2-7	TGTGCCAGCAGCTTGGACAGGGTTTACGAGCAGTACTTC	1	Blood	10658	FALSE	FALSE	FALSE
TGACTAGTCAGGTAAA-1-P190604_Blood_2	clone_P190604:10764:1	P190604	P190604_TRAV6_TGTGCTCTAGACATTAATAATGCAGGCAACATGCTCACCTTT_TRAJ39:P190604_TRBV27_TGTGCCAGCAGTTTAGACGGGATAAGCTACAATGAGCAGTTCTTC_TRBJ2-1	TRAC	TRAV6	TRAJ39	TGTGCTCTAGACATTAATAATGCAGGCAACATGCTCACCTTT	TRAC	TRBV27	TRBJ2-1	TGTGCCAGCAGTTTAGACGGGATAAGCTACAATGAGCAGTTCTTC	1	Blood	10764	FALSE	FALSE	FALSE
TGAGAGGTCCAGTAGT-1-P190604_Blood_2	clone_P190604:9718:1	P190604	P190604_TRAV13-1_TGTGCAGCAAGTAGTAGCAACTATCAGTTAATCTGG_TRAJ33:P190604_TRBV6-4_TGTGCCAGCAGTGGTGAGGGCGGAAACAATGAGCAGTTCTTC_TRBJ2-1	TRAC	TRAV13-1	TRAJ33	TGTGCAGCAAGTAGTAGCAACTATCAGTTAATCTGG	TRAC	TRBV6-4	TRBJ2-1	TGTGCCAGCAGTGGTGAGGGCGGAAACAATGAGCAGTTCTTC	1	Blood	9718	FALSE	FALSE	FALSE
TGAGAGGTCGCTGATA-1-P190604_Blood_2	clone_P190604:10565:1	P190604	P190604_TRAV34_TGTGGAGCAGCGAACACCGGTAACCAGTTCTATTTT_TRAJ49:P190604_TRBV5-4_TGTGCCAGCAGCTCCGGGACGTATCATAATTCACCCCTCCACTTT_TRBJ1-6	TRAC	TRAV34	TRAJ49	TGTGGAGCAGCGAACACCGGTAACCAGTTCTATTTT	TRAC	TRBV5-4	TRBJ1-6	TGTGCCAGCAGCTCCGGGACGTATCATAATTCACCCCTCCACTTT	1	Blood	10565	FALSE	FALSE	FALSE
TGAGCCGAGGCTATCT-1-P190604_Blood_2	clone_P190604:10500:1	P190604	P190604_TRAV3_TGTGCTGTGAGAGACATCAGGCGAGGAGGTGCTGACGGACTCACCTTT_TRAJ45:P190604_TRBV19_TGTGCCAGTAAAGGGTCTACCACCTCGGGTCAGCCCCAGCATTTT_TRBJ1-5	TRAC	TRAV3	TRAJ45	TGTGCTGTGAGAGACATCAGGCGAGGAGGTGCTGACGGACTCACCTTT	TRAC	TRBV19	TRBJ1-5	TGTGCCAGTAAAGGGTCTACCACCTCGGGTCAGCCCCAGCATTTT	1	Blood	10500	FALSE	FALSE	FALSE
TGAGGGAAGTCCTCCT-1-P190604_Blood_2	clone_P190604:9906:1	P190604	P190604_TRAV17_TGTGCTACGGACGAGGAATATGGAAACAAGCTGGTCTTT_TRAJ47:P190604_TRBV5-6_TGTGCCAGCAGCCCCCAAGGGACGGCGAACACTGAAGCTTTCTTT_TRBJ1-1	TRAC	TRAV17	TRAJ47	TGTGCTACGGACGAGGAATATGGAAACAAGCTGGTCTTT	TRAC	TRBV5-6	TRBJ1-1	TGTGCCAGCAGCCCCCAAGGGACGGCGAACACTGAAGCTTTCTTT	1	Blood	9906	FALSE	FALSE	FALSE
TGATTTCCACATCTTT-1-P190604_Blood_2	clone_P190604:10379:1	P190604	P190604_TRAV27_TGTGCAGGAGCGGCGGGACGAGAAACCAGTGGCTCTAGGTTGACCTTT_TRAJ58:P190604_TRBV5-1_TGCGCCAGCAGCCCCCCCTGGTCCTGGGAGCAGTACTTC_TRBJ2-7	TRAC	TRAV27	TRAJ58	TGTGCAGGAGCGGCGGGACGAGAAACCAGTGGCTCTAGGTTGACCTTT	TRAC	TRBV5-1	TRBJ2-7	TGCGCCAGCAGCCCCCCCTGGTCCTGGGAGCAGTACTTC	1	Blood	10379	FALSE	FALSE	FALSE
TGATTTCTCCGCAGTG-1-P190604_Blood_2	clone_P190604:10876:1	P190604	P190604_TRAV8-3_TGTGCTGTGGTGGAGATGGATAGCAGCTATAAATTGATCTTC_TRAJ12:P190604_TRBV5-4_TGTGCCAGCAGCAAAGACACCGGCGAGCAGTACTTC_TRBJ2-7	TRAC	TRAV8-3	TRAJ12	TGTGCTGTGGTGGAGATGGATAGCAGCTATAAATTGATCTTC	TRAC	TRBV5-4	TRBJ2-7	TGTGCCAGCAGCAAAGACACCGGCGAGCAGTACTTC	1	Blood	10876	FALSE	FALSE	FALSE
TGCACCTTCATCGGAT-1-P190604_Blood_2	clone_P190604:9478:2	P190604	P190604_TRAV1-2_TGTGCTTCCATGGATAGCAACTATCAGTTAATCTGG_TRAJ33:P190604_TRBV6-4_TGTGCCAGCAGTGACTCGACTAGCGGCACAGATACGCAGTATTTT_TRBJ2-3	TRAC	TRAV1-2	TRAJ33	TGTGCTTCCATGGATAGCAACTATCAGTTAATCTGG	TRAC	TRBV6-4	TRBJ2-3	TGTGCCAGCAGTGACTCGACTAGCGGCACAGATACGCAGTATTTT	2	Blood	9478	TRUE	TRUE	FALSE
TGCCCTAAGCCGTCGT-1-P190604_Blood_2	clone_P190604:10115:29	P190604	P190604_TRAV21_TGTGCTGCGGGGATGGATAGCAACTATCAGTTAATCTGG_TRAJ33:P190604_TRBV27_TGTGCCAGCAGTCCTCGGACAGGGACCGGCGAGCAGTACTTC_TRBJ2-7	TRAC	TRAV21	TRAJ33	TGTGCTGCGGGGATGGATAGCAACTATCAGTTAATCTGG	TRAC	TRBV27	TRBJ2-7	TGTGCCAGCAGTCCTCGGACAGGGACCGGCGAGCAGTACTTC	29	Blood	10115	TRUE	FALSE	FALSE
TGCGCAGGTGCTTCTC-1-P190604_Blood_2	clone_P190604:10115:29	P190604	P190604_TRAV21_TGTGCTGCGGGGATGGATAGCAACTATCAGTTAATCTGG_TRAJ33:P190604_TRBV27_TGTGCCAGCAGTCCTCGGACAGGGACCGGCGAGCAGTACTTC_TRBJ2-7	TRAC	TRAV21	TRAJ33	TGTGCTGCGGGGATGGATAGCAACTATCAGTTAATCTGG	TRAC	TRBV27	TRBJ2-7	TGTGCCAGCAGTCCTCGGACAGGGACCGGCGAGCAGTACTTC	29	Blood	10115	TRUE	FALSE	FALSE
TGCGCAGTCTGTTTGT-1-P190604_Blood_2	clone_P190604:10581:1	P190604	P190604_TRAV35_TGTGCTGGGCAGCTTAGGAATAACAATGCCAGACTCATGTTT_TRAJ31:P190604_TRBV30_TGTGCCTGGGGGCGGCAGGCTCACTATGGCTACACCTTC_TRBJ1-2	TRAC	TRAV35	TRAJ31	TGTGCTGGGCAGCTTAGGAATAACAATGCCAGACTCATGTTT	TRAC	TRBV30	TRBJ1-2	TGTGCCTGGGGGCGGCAGGCTCACTATGGCTACACCTTC	1	Blood	10581	FALSE	FALSE	FALSE
TGCGGGTAGACTTGAA-1-P190604_Blood_2	clone_P190604:10493:1	P190604	P190604_TRAV3_TGTGCTGTGAGAGACAGCGCCAATGCAGGCAAATCAACCTTT_TRAJ27:P190604_TRBV27_TGTGCCAGCAGTCTCCGGGCCGCTAGGGGAGATACGCAGTATTTT_TRBJ2-3	TRAC	TRAV3	TRAJ27	TGTGCTGTGAGAGACAGCGCCAATGCAGGCAAATCAACCTTT	TRAC	TRBV27	TRBJ2-3	TGTGCCAGCAGTCTCCGGGCCGCTAGGGGAGATACGCAGTATTTT	1	Blood	10493	FALSE	FALSE	FALSE
TGCGGGTCAAGCCTAT-1-P190604_Blood_2	clone_P190604:9504:13	P190604	P190604_TRAV12-1_TGTGTGGGCCATAATGCAGGCAACATGCTCACCTTT_TRAJ39:P190604_TRBV20-1_TGCAGTGCTAGCTTGCCAGGGGCTCCTAGCAATCAGCCCCAGCATTTT_TRBJ1-5	TRAC	TRAV12-1	TRAJ39	TGTGTGGGCCATAATGCAGGCAACATGCTCACCTTT	TRAC	TRBV20-1	TRBJ1-5	TGCAGTGCTAGCTTGCCAGGGGCTCCTAGCAATCAGCCCCAGCATTTT	13	Blood	9504	TRUE	FALSE	FALSE
TGCGTGGAGCTACCTA-1-P190604_Blood_2	clone_P190604:10115:29	P190604	P190604_TRAV21_TGTGCTGCGGGGATGGATAGCAACTATCAGTTAATCTGG_TRAJ33:P190604_TRBV27_TGTGCCAGCAGTCCTCGGACAGGGACCGGCGAGCAGTACTTC_TRBJ2-7	TRAC	TRAV21	TRAJ33	TGTGCTGCGGGGATGGATAGCAACTATCAGTTAATCTGG	TRAC	TRBV27	TRBJ2-7	TGTGCCAGCAGTCCTCGGACAGGGACCGGCGAGCAGTACTTC	29	Blood	10115	TRUE	FALSE	FALSE
TGCGTGGGTCCTAGCG-1-P190604_Blood_2	clone_P190604:9881:1	P190604	P190604_TRAV16_TGTGCTCTAAGTGGTGGTGCTACAAACAAGCTCATCTTT_TRAJ32:P190604_TRBV28_TGTGCCAGCCTGACACGGACTAATGAAAAACTGTTTTTT_TRBJ1-4	TRAC	TRAV16	TRAJ32	TGTGCTCTAAGTGGTGGTGCTACAAACAAGCTCATCTTT	TRAC	TRBV28	TRBJ1-4	TGTGCCAGCCTGACACGGACTAATGAAAAACTGTTTTTT	1	Blood	9881	FALSE	FALSE	FALSE
TGCTACCGTATATCCG-1-P190604_Blood_2	clone_P190604:10113:1	P190604	P190604_TRAV21_TGTGCTGCAACTGGAGCCAATAGTAAGCTGACATTT_TRAJ56:P190604_TRBV7-9_TGTGCCAGCAGCTTTGAGGGGGTTGGGGTGCCTTTCTTT_TRBJ1-1	TRAC	TRAV21	TRAJ56	TGTGCTGCAACTGGAGCCAATAGTAAGCTGACATTT	TRAC	TRBV7-9	TRBJ1-1	TGTGCCAGCAGCTTTGAGGGGGTTGGGGTGCCTTTCTTT	1	Blood	10113	FALSE	FALSE	FALSE
TGCTACCGTTACGTCA-1-P190604_Blood_2	clone_P190604:10123:1	P190604	P190604_TRAV21_TGTGCTGTCCCCCGGGTTTTGACAACTGACAGCTGGGGGAAATTCCAGTTT_TRAJ24:P190604_TRBV19_TGTGCCAGTAGTATAACAGGGACCGGGGAGCTGTTTTTT_TRBJ2-2	TRAC	TRAV21	TRAJ24	TGTGCTGTCCCCCGGGTTTTGACAACTGACAGCTGGGGGAAATTCCAGTTT	TRAC	TRBV19	TRBJ2-2	TGTGCCAGTAGTATAACAGGGACCGGGGAGCTGTTTTTT	1	Blood	10123	FALSE	FALSE	FALSE
TGCTGCTGTGATAAGT-1-P190604_Blood_2	clone_P190604:9795:4	P190604	P190604_TRAV13-2_TGTGCAGAGAGTCAATATGCTGGTGGTACTAGCTATGGAAAGCTGACATTT_TRAJ52:P190604_TRBV27_TGTGCCAGCAGTCCCGGGATTAGGACTGAAGCTTTCTTT_TRBJ1-1	TRAC	TRAV13-2	TRAJ52	TGTGCAGAGAGTCAATATGCTGGTGGTACTAGCTATGGAAAGCTGACATTT	TRAC	TRBV27	TRBJ1-1	TGTGCCAGCAGTCCCGGGATTAGGACTGAAGCTTTCTTT	4	Blood	9795	TRUE	FALSE	FALSE
TGCTGCTTCAGATAAG-1-P190604_Blood_2	clone_P190604:10809:1	P190604	P190604_TRAV8-2_TGTGTTGTGAGTGATCGGAGCAATGACATGCGCTTT_TRAJ43:P190604_TRBV2_TGTGCCAGCAGTGACCCCTTGGGGGGAGGGAAATCAGATACGCAGTATTTT_TRBJ2-3	TRAC	TRAV8-2	TRAJ43	TGTGTTGTGAGTGATCGGAGCAATGACATGCGCTTT	TRAC	TRBV2	TRBJ2-3	TGTGCCAGCAGTGACCCCTTGGGGGGAGGGAAATCAGATACGCAGTATTTT	1	Blood	10809	FALSE	FALSE	FALSE
TGGACGCTCCTTGACC-1-P190604_Blood_2	clone_P190604:10827:1	P190604	P190604_TRAV8-3_TGTGCTGTACAAACTGGGGCAAACAACCTCTTCTTT_TRAJ36:P190604_TRBV6-5_TGTGCCAGCCTAGATTGGGGAGACACCGGGGAGCTGTTTTTT_TRBJ2-2	TRAC	TRAV8-3	TRAJ36	TGTGCTGTACAAACTGGGGCAAACAACCTCTTCTTT	TRAC	TRBV6-5	TRBJ2-2	TGTGCCAGCCTAGATTGGGGAGACACCGGGGAGCTGTTTTTT	1	Blood	10827	FALSE	FALSE	FALSE
TGGCCAGAGACTAGGC-1-P190604_Blood_2	clone_P190604:10946:1	P190604	P190604_TRAV8-6_TGTGCTGTGAGTCGGGGTAGTGGAGGTAGCAACTATAAACTGACATTT_TRAJ53:P190604_TRBV20-1_TGCAGTGTGGGACTAGCGGGAAGGTACGAGCAGTACTTC_TRBJ2-7	TRAC	TRAV8-6	TRAJ53	TGTGCTGTGAGTCGGGGTAGTGGAGGTAGCAACTATAAACTGACATTT	TRAC	TRBV20-1	TRBJ2-7	TGCAGTGTGGGACTAGCGGGAAGGTACGAGCAGTACTTC	1	Blood	10946	FALSE	FALSE	FALSE
TGGCGCACATTGTGCA-1-P190604_Blood_2	clone_P190604:10557:1	P190604	P190604_TRAV30_TGCGGCACAGAGGTACTGGGTAACCAGTTCTATTTT_TRAJ49:P190604_TRBV29-1_TGCAGCGTTGAAGACAGAAACTATGGCTACACCTTC_TRBJ1-2	TRAC	TRAV30	TRAJ49	TGCGGCACAGAGGTACTGGGTAACCAGTTCTATTTT	TRAC	TRBV29-1	TRBJ1-2	TGCAGCGTTGAAGACAGAAACTATGGCTACACCTTC	1	Blood	10557	FALSE	FALSE	FALSE
TGGCTGGTCTATCCCG-1-P190604_Blood_2	clone_P190604:10836:1	P190604	P190604_TRAV8-3_TGTGCTGTGGCCCGATACTCTGGGGCTGGGAGTTACCAACTCACTTTC_TRAJ28:P190604_TRBV5-8_TGTGCCAGCAGCATAGGAGGGTCCTTGAACACTGAAGCTTTCTTT_TRBJ1-1	TRAC	TRAV8-3	TRAJ28	TGTGCTGTGGCCCGATACTCTGGGGCTGGGAGTTACCAACTCACTTTC	TRAC	TRBV5-8	TRBJ1-1	TGTGCCAGCAGCATAGGAGGGTCCTTGAACACTGAAGCTTTCTTT	1	Blood	10836	FALSE	FALSE	FALSE
TGGGAAGCAGATGGGT-1-P190604_Blood_2	clone_P190604:10506:1	P190604	P190604_TRAV3_TGTGCTGTGAGAGACCCCTCATACTCTGGGGCTGGGAGTTACCAACTCACTTTC_TRAJ28:P190604_TRBV11-2_TGTGCCAGCAGCGTTCGACAGGGGGGTAGCTCCTATAATTCACCCCTCCACTTT_TRBJ1-6	TRAC	TRAV3	TRAJ28	TGTGCTGTGAGAGACCCCTCATACTCTGGGGCTGGGAGTTACCAACTCACTTTC	TRAC	TRBV11-2	TRBJ1-6	TGTGCCAGCAGCGTTCGACAGGGGGGTAGCTCCTATAATTCACCCCTCCACTTT	1	Blood	10506	FALSE	FALSE	FALSE
TGGGCGTAGAGTACCG-1-P190604_Blood_2	clone_P190604:10333:1	P190604	P190604_TRAV26-1_TGCATCGTCTCCTTTACTGGAGCCAATAGTAAGCTGACATTT_TRAJ56:P190604_TRBV7-9_TGTGCCAGCAGCTTATCCTACCGAAAGGCAGGGGGCGAGCAGTACTTC_TRBJ2-7	TRAC	TRAV26-1	TRAJ56	TGCATCGTCTCCTTTACTGGAGCCAATAGTAAGCTGACATTT	TRAC	TRBV7-9	TRBJ2-7	TGTGCCAGCAGCTTATCCTACCGAAAGGCAGGGGGCGAGCAGTACTTC	1	Blood	10333	FALSE	FALSE	FALSE
TGTATTCGTAAACCTC-1-P190604_Blood_2	clone_P190604:10293:1	P190604	P190604_TRAV26-1_TGCATCGTCAACAGGGCTGGCAACAACCGTAAGCTGATTTGG_TRAJ38:P190604_TRBV12-3_TGTGCCAGCAGTCAGACAGGGGGTAATGAAAAACTGTTTTTT_TRBJ1-4	TRAC	TRAV26-1	TRAJ38	TGCATCGTCAACAGGGCTGGCAACAACCGTAAGCTGATTTGG	TRAC	TRBV12-3	TRBJ1-4	TGTGCCAGCAGTCAGACAGGGGGTAATGAAAAACTGTTTTTT	1	Blood	10293	FALSE	FALSE	FALSE
TGTGGTACACATTAGC-1-P190604_Blood_2	clone_P190604:9977:1	P190604	P190604_TRAV19_TGTGCTCTGAGGGGGGGCTCTAGCAACACAGGCAAACTAATCTTT_TRAJ37:P190604_TRBV15_TGTGCCACCAGCAGAGAGCGCGGACTAACTAATCAGCCCCAGCATTTT_TRBJ1-5	TRAC	TRAV19	TRAJ37	TGTGCTCTGAGGGGGGGCTCTAGCAACACAGGCAAACTAATCTTT	TRAC	TRBV15	TRBJ1-5	TGTGCCACCAGCAGAGAGCGCGGACTAACTAATCAGCCCCAGCATTTT	1	Blood	9977	FALSE	FALSE	FALSE
TGTGTTTGTGCCTTGG-1-P190604_Blood_2	clone_P190604:9412:1	P190604	P190604_TRAV1-2_TGTGCTGTGAGAGGCAGAGGCTCAACCCTGGGGAGGCTATACTTT_TRAJ18:P190604_TRBV4-1_TGCGCCAGCAGCCAACCCCTAGTCCGAGGTGGGGATACGCAGTATTTT_TRBJ2-3	TRAC	TRAV1-2	TRAJ18	TGTGCTGTGAGAGGCAGAGGCTCAACCCTGGGGAGGCTATACTTT	TRAC	TRBV4-1	TRBJ2-3	TGCGCCAGCAGCCAACCCCTAGTCCGAGGTGGGGATACGCAGTATTTT	1	Blood	9412	FALSE	FALSE	FALSE
TGTGTTTGTTGACGTT-1-P190604_Blood_2	clone_P190604:9634:1	P190604	P190604_TRAV12-2_TGTGCCGTGCGTTCTATTTCTTCTGGTTCTGCAAGGCAACTGACCTTT_TRAJ22:P190604_TRBV6-1_TGTGCCAGCACCGGGACAGGGCTCCACGAGCAGTACTTC_TRBJ2-7	TRAC	TRAV12-2	TRAJ22	TGTGCCGTGCGTTCTATTTCTTCTGGTTCTGCAAGGCAACTGACCTTT	TRAC	TRBV6-1	TRBJ2-7	TGTGCCAGCACCGGGACAGGGCTCCACGAGCAGTACTTC	1	Blood	9634	FALSE	FALSE	FALSE
TGTGTTTTCCGTAGGC-1-P190604_Blood_2	clone_P190604:10163:12	P190604	P190604_TRAV21_TGTGCTGTGGAGGATAGCAACTATCAGTTAATCTGG_TRAJ33:P190604_TRBV5-1_TGCGCCAGCCGAGATACCATCGGGACAGACGACTATGGCTACACCTTC_TRBJ1-2	TRAC	TRAV21	TRAJ33	TGTGCTGTGGAGGATAGCAACTATCAGTTAATCTGG	TRAC	TRBV5-1	TRBJ1-2	TGCGCCAGCCGAGATACCATCGGGACAGACGACTATGGCTACACCTTC	12	Blood	10163	TRUE	FALSE	FALSE
TGTTCCGAGTTGCAGG-1-P190604_Blood_2	clone_P190604:10361:1	P190604	P190604_TRAV27_TGTGCAGGACACGGCAACTTCAACAAATTTTACTTT_TRAJ21:P190604_TRBV11-2_TGTGCCAGCAGCGTGGACAGAAACTATGGCTACACCTTC_TRBJ1-2	TRAC	TRAV27	TRAJ21	TGTGCAGGACACGGCAACTTCAACAAATTTTACTTT	TRAC	TRBV11-2	TRBJ1-2	TGTGCCAGCAGCGTGGACAGAAACTATGGCTACACCTTC	1	Blood	10361	FALSE	FALSE	FALSE
TTAGGCATCTGACCTC-1-P190604_Blood_2	clone_P190604:10421:60	P190604	P190604_TRAV29/DV5_TGTGCAGCAAGCGCCCATAGTGGAGGTAGCAACTATAAACTGACATTT_TRAJ53:P190604_TRBV7-9_TGTGCCACCAGATTAGGGTACGAGCAGTACTTC_TRBJ2-7	TRAC	TRAV29/DV5	TRAJ53	TGTGCAGCAAGCGCCCATAGTGGAGGTAGCAACTATAAACTGACATTT	TRAC	TRBV7-9	TRBJ2-7	TGTGCCACCAGATTAGGGTACGAGCAGTACTTC	60	Blood	10421	TRUE	FALSE	FALSE
TTATGCTGTGGTACAG-1-P190604_Blood_2	clone_P190604:9773:1	P190604	P190604_TRAV13-2_TGTGCAGAGAATAGATGGGCGGCATCTAACTTTGGAAATGAGAAATTAACCTTT_TRAJ48:P190604_TRBV7-2_TGTGCCAGCTCCATTAGTCCGAACACCGGGGAGCTGTTTTTT_TRBJ2-2	TRAC	TRAV13-2	TRAJ48	TGTGCAGAGAATAGATGGGCGGCATCTAACTTTGGAAATGAGAAATTAACCTTT	TRAC	TRBV7-2	TRBJ2-2	TGTGCCAGCTCCATTAGTCCGAACACCGGGGAGCTGTTTTTT	1	Blood	9773	FALSE	FALSE	FALSE
TTCCCAGGTCCTCCAT-1-P190604_Blood_2	clone_P190604:9684:1	P190604	P190604_TRAV12-3_TGTGCAATGAGGGCCAATGCAGGCAAATCAACCTTT_TRAJ27:P190604_TRBV19_TGTGCCAGTAGTTCGACAGGGGGTTCGGTCTATAATTCACCCCTCCACTTT_TRBJ1-6	TRAC	TRAV12-3	TRAJ27	TGTGCAATGAGGGCCAATGCAGGCAAATCAACCTTT	TRAC	TRBV19	TRBJ1-6	TGTGCCAGTAGTTCGACAGGGGGTTCGGTCTATAATTCACCCCTCCACTTT	1	Blood	9684	FALSE	FALSE	FALSE
TTCGGTCAGGTACTCT-1-P190604_Blood_2	clone_P190604:10012:1	P190604	P190604_TRAV19_TGTGCTCTGAGTGAGGGTCTCGGGGATGCAGGCAACATGCTCACCTTT_TRAJ39:P190604_TRBV6-5_TGTGCCAGCAGTCCACACCTGGGGACTGAAGCTTTCTTT_TRBJ1-1	TRAC	TRAV19	TRAJ39	TGTGCTCTGAGTGAGGGTCTCGGGGATGCAGGCAACATGCTCACCTTT	TRAC	TRBV6-5	TRBJ1-1	TGTGCCAGCAGTCCACACCTGGGGACTGAAGCTTTCTTT	1	Blood	10012	FALSE	FALSE	FALSE
TTCGGTCTCGTTGCCT-1-P190604_Blood_2	clone_P190604:10548:1	P190604	P190604_TRAV3_TGTGCTGTGGATCAAATTACCTCAGGAACCTACAAATACATCTTT_TRAJ40:P190604_TRBV9_TGTGCCAGCAGCGTAGACCCTAGACCTTACAATGAGCAGTTCTTC_TRBJ2-1	TRAC	TRAV3	TRAJ40	TGTGCTGTGGATCAAATTACCTCAGGAACCTACAAATACATCTTT	TRAC	TRBV9	TRBJ2-1	TGTGCCAGCAGCGTAGACCCTAGACCTTACAATGAGCAGTTCTTC	1	Blood	10548	FALSE	FALSE	FALSE
TTCTCAAAGAGTCTGG-1-P190604_Blood_2	clone_P190604:10421:60	P190604	P190604_TRAV29/DV5_TGTGCAGCAAGCGCCCATAGTGGAGGTAGCAACTATAAACTGACATTT_TRAJ53:P190604_TRBV7-9_TGTGCCACCAGATTAGGGTACGAGCAGTACTTC_TRBJ2-7	TRAC	TRAV29/DV5	TRAJ53	TGTGCAGCAAGCGCCCATAGTGGAGGTAGCAACTATAAACTGACATTT	TRAC	TRBV7-9	TRBJ2-7	TGTGCCACCAGATTAGGGTACGAGCAGTACTTC	60	Blood	10421	TRUE	FALSE	FALSE
TTCTCCTCAAACTGCT-1-P190604_Blood_2	clone_P190604:10421:60	P190604	P190604_TRAV29/DV5_TGTGCAGCAAGCGCCCATAGTGGAGGTAGCAACTATAAACTGACATTT_TRAJ53:P190604_TRBV7-9_TGTGCCACCAGATTAGGGTACGAGCAGTACTTC_TRBJ2-7	TRAC	TRAV29/DV5	TRAJ53	TGTGCAGCAAGCGCCCATAGTGGAGGTAGCAACTATAAACTGACATTT	TRAC	TRBV7-9	TRBJ2-7	TGTGCCACCAGATTAGGGTACGAGCAGTACTTC	60	Blood	10421	TRUE	FALSE	FALSE
TTCTTAGGTCCAGTAT-1-P190604_Blood_2	clone_P190604:9965:8	P190604	P190604_TRAV19_TGTGCTCTGAATACCAGGCAGGCAGGAACTGCTCTGATCTTT_TRAJ15:P190604_TRBV11-2_TGTGCCAGCAGCTTAGCACCACAGGTTTATTCACCCCTCCACTTT_TRBJ1-6	TRAC	TRAV19	TRAJ15	TGTGCTCTGAATACCAGGCAGGCAGGAACTGCTCTGATCTTT	TRAC	TRBV11-2	TRBJ1-6	TGTGCCAGCAGCTTAGCACCACAGGTTTATTCACCCCTCCACTTT	8	Blood	9965	TRUE	FALSE	FALSE
TTGAACGTCACCTCGT-1-P190604_Blood_2	clone_P190604:9947:1	P190604	P190604_TRAV17_TGTGCTACGGTCTCGATTTATAACCAGGGAGGAAAGCTTATCTTC_TRAJ23:P190604_TRBV7-2_TGTGCCAGCAGCCCGAGGGACATGATTTATGGCTACACCTTC_TRBJ1-2	TRAC	TRAV17	TRAJ23	TGTGCTACGGTCTCGATTTATAACCAGGGAGGAAAGCTTATCTTC	TRAC	TRBV7-2	TRBJ1-2	TGTGCCAGCAGCCCGAGGGACATGATTTATGGCTACACCTTC	1	Blood	9947	FALSE	FALSE	FALSE
TTGCCGTAGAGAACAG-1-P190604_Blood_2	clone_P190604:10142:1	P190604	P190604_TRAV21_TGTGCTGTGAGATCAGGAGGAGGTGCTGACGGACTCACCTTT_TRAJ45:P190604_TRBV28_TGTGCCAGCAGTGCAGGGGGCGTGGGCGAAGCTTTCTTT_TRBJ1-1	TRAC	TRAV21	TRAJ45	TGTGCTGTGAGATCAGGAGGAGGTGCTGACGGACTCACCTTT	TRAC	TRBV28	TRBJ1-1	TGTGCCAGCAGTGCAGGGGGCGTGGGCGAAGCTTTCTTT	1	Blood	10142	FALSE	FALSE	FALSE
TTGCGTCCATGACGGA-1-P190604_Blood_2	clone_P190604:10545:1	P190604	P190604_TRAV3_TGTGCTGTGCAGTGGGCTGCAGGCAACAAGCTAACTTTT_TRAJ17:P190604_TRBV28_TGTGCCAGCAGTTCATCTGGGGACATCACCGGGGAGCTGTTTTTT_TRBJ2-2	TRAC	TRAV3	TRAJ17	TGTGCTGTGCAGTGGGCTGCAGGCAACAAGCTAACTTTT	TRAC	TRBV28	TRBJ2-2	TGTGCCAGCAGTTCATCTGGGGACATCACCGGGGAGCTGTTTTTT	1	Blood	10545	FALSE	FALSE	FALSE
TTGTAGGCAGCTCGAC-1-P190604_Blood_2	clone_P190604:10740:2	P190604	P190604_TRAV5_TGTGCAGAGAGTACTTTCCGAGGAGGAAGCTACATACCTACATTT_TRAJ6:P190604_TRBV6-2_TGTGCCAGCAGAGAGGGCAGCGGTGAGCAGTTCTTC_TRBJ2-1	TRAC	TRAV5	TRAJ6	TGTGCAGAGAGTACTTTCCGAGGAGGAAGCTACATACCTACATTT	TRAC	TRBV6-2	TRBJ2-1	TGTGCCAGCAGAGAGGGCAGCGGTGAGCAGTTCTTC	2	Blood	10740	TRUE	FALSE	FALSE
TTGTAGGTCAAACAAG-1-P190604_Blood_2	clone_P190604:10803:1	P190604	P190604_TRAV8-2_TGTGTTGTGAGTCCCGGTGGCTACAATAAGCTGATTTTT_TRAJ4:P190604_TRBV20-1_TGCAGTGCTGCTCGGGACAGGGGAACAGATACGCAGTATTTT_TRBJ2-3	TRAC	TRAV8-2	TRAJ4	TGTGTTGTGAGTCCCGGTGGCTACAATAAGCTGATTTTT	TRAC	TRBV20-1	TRBJ2-3	TGCAGTGCTGCTCGGGACAGGGGAACAGATACGCAGTATTTT	1	Blood	10803	FALSE	FALSE	FALSE
TTTACTGAGACAAGCC-1-P190604_Blood_2	clone_P190604:11027:1	P190604	P190604_TRAV9-2_TGTGCTCTGAGTGGTTCTTCAGGCTTTCAGAAACTTGTATTT_TRAJ8:P190604_TRBV7-9_TGTGCCAGCAGCTTAAATTCAGGGGGGAATAATTCACCCCTCCACTTT_TRBJ1-6	TRAC	TRAV9-2	TRAJ8	TGTGCTCTGAGTGGTTCTTCAGGCTTTCAGAAACTTGTATTT	TRAC	TRBV7-9	TRBJ1-6	TGTGCCAGCAGCTTAAATTCAGGGGGGAATAATTCACCCCTCCACTTT	1	Blood	11027	FALSE	FALSE	FALSE
TTTACTGAGACTACAA-1-P190604_Blood_2	clone_P190604:10899:1	P190604	P190604_TRAV8-4_TGTGCTGTGAGTAAGCCCAATGCCAGACTCATGTTT_TRAJ31:P190604_TRBV7-2_TGTGCCAGCAGCCCAAGGATAGCGGGAGCCTTCTACAATGAGCAGTTCTTC_TRBJ2-1	TRAC	TRAV8-4	TRAJ31	TGTGCTGTGAGTAAGCCCAATGCCAGACTCATGTTT	TRAC	TRBV7-2	TRBJ2-1	TGTGCCAGCAGCCCAAGGATAGCGGGAGCCTTCTACAATGAGCAGTTCTTC	1	Blood	10899	FALSE	FALSE	FALSE
TTTACTGAGCGATTCT-1-P190604_Blood_2	clone_P190604:10403:1	P190604	P190604_TRAV29/DV5_TGTGCAGCAACCTGGAATAACAATGCCAGACTCATGTTT_TRAJ31:P190604_TRBV20-1_TGCAGTGCCACCGGGGGCTACGAGCAGTACTTC_TRBJ2-7	TRAC	TRAV29/DV5	TRAJ31	TGTGCAGCAACCTGGAATAACAATGCCAGACTCATGTTT	TRAC	TRBV20-1	TRBJ2-7	TGCAGTGCCACCGGGGGCTACGAGCAGTACTTC	1	Blood	10403	FALSE	FALSE	FALSE
TTTACTGGTACTTAGC-1-P190604_Blood_2	clone_P190604:10421:60	P190604	P190604_TRAV29/DV5_TGTGCAGCAAGCGCCCATAGTGGAGGTAGCAACTATAAACTGACATTT_TRAJ53:P190604_TRBV7-9_TGTGCCACCAGATTAGGGTACGAGCAGTACTTC_TRBJ2-7	TRAC	TRAV29/DV5	TRAJ53	TGTGCAGCAAGCGCCCATAGTGGAGGTAGCAACTATAAACTGACATTT	TRAC	TRBV7-9	TRBJ2-7	TGTGCCACCAGATTAGGGTACGAGCAGTACTTC	60	Blood	10421	TRUE	FALSE	FALSE
TTTACTGGTCTAGCCG-1-P190604_Blood_2	clone_P190604:9306:1	P190604	P190604_TRAV1-1_TGCGCTGTGAGAGATTACTCTGGGGCTGGGAGTTACCAACTCACTTTC_TRAJ28:P190604_TRBV27_TGTGCCAGCAGTTTATTGTCTAGCGCTTTCGAGACCCAGTACTTC_TRBJ2-5	TRAC	TRAV1-1	TRAJ28	TGCGCTGTGAGAGATTACTCTGGGGCTGGGAGTTACCAACTCACTTTC	TRAC	TRBV27	TRBJ2-5	TGTGCCAGCAGTTTATTGTCTAGCGCTTTCGAGACCCAGTACTTC	1	Blood	9306	FALSE	FALSE	FALSE
TTTACTGGTGACCAAG-1-P190604_Blood_2	clone_P190604:10115:29	P190604	P190604_TRAV21_TGTGCTGCGGGGATGGATAGCAACTATCAGTTAATCTGG_TRAJ33:P190604_TRBV27_TGTGCCAGCAGTCCTCGGACAGGGACCGGCGAGCAGTACTTC_TRBJ2-7	TRAC	TRAV21	TRAJ33	TGTGCTGCGGGGATGGATAGCAACTATCAGTTAATCTGG	TRAC	TRBV27	TRBJ2-7	TGTGCCAGCAGTCCTCGGACAGGGACCGGCGAGCAGTACTTC	29	Blood	10115	TRUE	FALSE	FALSE
TTTCCTCAGATATGCA-1-P190604_Blood_2	clone_P190604:10421:60	P190604	P190604_TRAV29/DV5_TGTGCAGCAAGCGCCCATAGTGGAGGTAGCAACTATAAACTGACATTT_TRAJ53:P190604_TRBV7-9_TGTGCCACCAGATTAGGGTACGAGCAGTACTTC_TRBJ2-7	TRAC	TRAV29/DV5	TRAJ53	TGTGCAGCAAGCGCCCATAGTGGAGGTAGCAACTATAAACTGACATTT	TRAC	TRBV7-9	TRBJ2-7	TGTGCCACCAGATTAGGGTACGAGCAGTACTTC	60	Blood	10421	TRUE	FALSE	FALSE
TTTCCTCTCAGGCCCA-1-P190604_Blood_2	clone_P190604:9365:1	P190604	P190604_TRAV1-2_TGTGCTGTGACCCTAAGGGACTATGGTCAGAATTTTGTCTTT_TRAJ26:P190604_TRBV24-1_TGTGCCACTAGGGAAGGGCCAGCGAACACTGAAGCTTTCTTT_TRBJ1-1	TRAC	TRAV1-2	TRAJ26	TGTGCTGTGACCCTAAGGGACTATGGTCAGAATTTTGTCTTT	TRAC	TRBV24-1	TRBJ1-1	TGTGCCACTAGGGAAGGGCCAGCGAACACTGAAGCTTTCTTT	1	Blood	9365	FALSE	FALSE	FALSE
TTTGTCAAGAAGCCCA-1-P190604_Blood_2	clone_P190604:10187:1	P190604	P190604_TRAV22_TGTGCTGGGAGGAATTCAGGAAACACACCTCTTGTCTTT_TRAJ29:P190604_TRBV7-8_TGTGCCAGCAGCTTGGCCTCATCCAGGGGGCGCGGTGCGCAGTATTTT_TRBJ2-3	TRAC	TRAV22	TRAJ29	TGTGCTGGGAGGAATTCAGGAAACACACCTCTTGTCTTT	TRAC	TRBV7-8	TRBJ2-3	TGTGCCAGCAGCTTGGCCTCATCCAGGGGGCGCGGTGCGCAGTATTTT	1	Blood	10187	FALSE	FALSE	FALSE
AAACCTGAGCCCTAAT-1-P190604_Liver_1	clone_P190604:10346:1	P190604	P190604_TRAV26-2_TGCATCCTGAGAGACTCGGGCACCGACAAGCTCATCTTT_TRAJ34:P190604_TRBV20-1_TGCATGGCGAGGGCGGGAGTGGTAATGAATGAGCAGTTCTTC_TRBJ2-1	TRAC	TRAV26-2	TRAJ34	TGCATCCTGAGAGACTCGGGCACCGACAAGCTCATCTTT	TRAC	TRBV20-1	TRBJ2-1	TGCATGGCGAGGGCGGGAGTGGTAATGAATGAGCAGTTCTTC	1	Liver	10346	FALSE	FALSE	FALSE
AAACCTGCAGTGAGTG-1-P190604_Liver_1	clone_P190604:10699:1	P190604	P190604_TRAV40_TGTCTTCTGCTACCCCACAATGACATGCGCTTT_TRAJ43:P190604_TRBV7-3_TGTGCCAGCAGCATTAATCTCCGGGGGTATGGCTACACCTTC_TRBJ1-2	TRAC	TRAV40	TRAJ43	TGTCTTCTGCTACCCCACAATGACATGCGCTTT	TRAC	TRBV7-3	TRBJ1-2	TGTGCCAGCAGCATTAATCTCCGGGGGTATGGCTACACCTTC	1	Liver	10699	FALSE	FALSE	FALSE
AAACCTGGTATGAATG-1-P190604_Liver_1	clone_P190604:10479:2	P190604	P190604_TRAV3_TGTGCTGGCCCAACTGACAGCTGGGGGAAATTGCAGTTT_TRAJ24:P190604_TRBV30_TGTGCCTGGATGCTAGGGATCGGAGGCACTGAAGCTTTCTTT_TRBJ1-1	TRAC	TRAV3	TRAJ24	TGTGCTGGCCCAACTGACAGCTGGGGGAAATTGCAGTTT	TRAC	TRBV30	TRBJ1-1	TGTGCCTGGATGCTAGGGATCGGAGGCACTGAAGCTTTCTTT	2	Liver	10479	TRUE	FALSE	FALSE
AAACCTGGTCACACGC-1-P190604_Liver_1	clone_P190604:10586:6	P190604	P190604_TRAV35_TGTGCTGGGCAGTATTATTCAGGAAACACACCTCTTGTCTTT_TRAJ29:P190604_TRBV6-5_TGTGCCAGCAGTCCAGGGACTTACACGGACACCGGGGAGCTGTTTTTT_TRBJ2-2	TRAC	TRAV35	TRAJ29	TGTGCTGGGCAGTATTATTCAGGAAACACACCTCTTGTCTTT	TRAC	TRBV6-5	TRBJ2-2	TGTGCCAGCAGTCCAGGGACTTACACGGACACCGGGGAGCTGTTTTTT	6	Liver	10586	TRUE	FALSE	FALSE
AAACCTGGTCGCGAAA-1-P190604_Liver_1	clone_P190604:10935:4	P190604	P190604_TRAV8-4_TGTGCTGTGGGGCTCACGGGAGGAGGAAACAAACTCACCTTT_TRAJ10:P190604_TRBV27_TGTGCCAGCAGTTCAGCTGGAGGGAGCGAATATGGCTACACCTTC_TRBJ1-2	TRAC	TRAV8-4	TRAJ10	TGTGCTGTGGGGCTCACGGGAGGAGGAAACAAACTCACCTTT	TRAC	TRBV27	TRBJ1-2	TGTGCCAGCAGTTCAGCTGGAGGGAGCGAATATGGCTACACCTTC	4	Liver	10935	TRUE	FALSE	FALSE
AAACCTGTCACCTCGT-1-P190604_Liver_1	clone_P190604:9834:1	P190604	P190604_TRAV14/DV4_TGTGCAATGAGAGAGGGCCGGCGAACTTATAACACCGACAAGCTCATCTTT_TRAJ34:P190604_TRBV10-2_TGCGCCAGCAGTGACGGGACAGGGTTTGAAAAACTGTTTTTT_TRBJ1-4	TRAC	TRAV14/DV4	TRAJ34	TGTGCAATGAGAGAGGGCCGGCGAACTTATAACACCGACAAGCTCATCTTT	TRAC	TRBV10-2	TRBJ1-4	TGCGCCAGCAGTGACGGGACAGGGTTTGAAAAACTGTTTTTT	1	Liver	9834	FALSE	FALSE	FALSE
AAACCTGTCAGGCCCA-1-P190604_Liver_1	clone_P190604:10887:1	P190604	P190604_TRAV8-4_TGTGCTGTGAAGTCCCCCGCCAGGGCCAGACTCATGTTT_TRAJ31:P190604_TRBV30_TGTGCCTTAGGGACTAGCGGGAGCACAGATACGCAGTATTTT_TRBJ2-3	TRAC	TRAV8-4	TRAJ31	TGTGCTGTGAAGTCCCCCGCCAGGGCCAGACTCATGTTT	TRAC	TRBV30	TRBJ2-3	TGTGCCTTAGGGACTAGCGGGAGCACAGATACGCAGTATTTT	1	Liver	10887	FALSE	FALSE	FALSE
AAACGGGGTCAGAGGT-1-P190604_Liver_1	clone_P190604:10326:2	P190604	P190604_TRAV26-1_TGCATCGTCAGGACTTTTAGTACCGGCACTGCCAGTAAACTCACCTTT_TRAJ44:P190604_TRBV20-1_TGCAGTGCCAGCCGGGACAGGGGCAGCGAGCAGTACTTC_TRBJ2-7	TRAC	TRAV26-1	TRAJ44	TGCATCGTCAGGACTTTTAGTACCGGCACTGCCAGTAAACTCACCTTT	TRAC	TRBV20-1	TRBJ2-7	TGCAGTGCCAGCCGGGACAGGGGCAGCGAGCAGTACTTC	2	Liver	10326	TRUE	FALSE	FALSE
AAACGGGGTTATCACG-1-P190604_Liver_1	clone_P190604:10190:1	P190604	P190604_TRAV22_TGTGCTGTCCTTACATCAGGAGGAAGCTACATACCTACATTT_TRAJ6:P190604_TRBV9_TGTGCCAGCAGCGTCTCCCATAATTCACCCCTCCACTTT_TRBJ1-6	TRAC	TRAV22	TRAJ6	TGTGCTGTCCTTACATCAGGAGGAAGCTACATACCTACATTT	TRAC	TRBV9	TRBJ1-6	TGTGCCAGCAGCGTCTCCCATAATTCACCCCTCCACTTT	1	Liver	10190	FALSE	FALSE	FALSE
AAACGGGGTTATCCGA-1-P190604_Liver_1	clone_P190604:9454:1	P190604	P190604_TRAV1-2_TGTGCTGTGATGGGTAGCAACTATCAGTTAATCTGG_TRAJ33:P190604_TRBV19_TGTGCCAGTAGTATAGGGCGGGAGCCCTACGAGCAGTACTTC_TRBJ2-7	TRAC	TRAV1-2	TRAJ33	TGTGCTGTGATGGGTAGCAACTATCAGTTAATCTGG	TRAC	TRBV19	TRBJ2-7	TGTGCCAGTAGTATAGGGCGGGAGCCCTACGAGCAGTACTTC	1	Liver	9454	FALSE	TRUE	FALSE
AAAGATGAGGACAGAA-1-P190604_Liver_1	clone_P190604:9615:1	P190604	P190604_TRAV12-2_TGTGCCGTGAAGAGGGGAGGAAGCTACATACCTACATTT_TRAJ6:P190604_TRBV7-3_TGTGCCAGCAGCTTAAGACAGGGCGTGGAGGATACGCAGTATTTT_TRBJ2-3	TRAC	TRAV12-2	TRAJ6	TGTGCCGTGAAGAGGGGAGGAAGCTACATACCTACATTT	TRAC	TRBV7-3	TRBJ2-3	TGTGCCAGCAGCTTAAGACAGGGCGTGGAGGATACGCAGTATTTT	1	Liver	9615	FALSE	FALSE	FALSE
AAAGCAAAGGACACCA-1-P190604_Liver_1	clone_P190604:10046:3	P190604	P190604_TRAV2_TGTGCTGTGGAGGATAACACCAATGCAGGCAAATCAACCTTT_TRAJ27:P190604_TRBV6-1_TGTGCCAGCAGTGAAGCGACTTCCTCCTACAATGAGCAGTTCTTC_TRBJ2-1	TRAC	TRAV2	TRAJ27	TGTGCTGTGGAGGATAACACCAATGCAGGCAAATCAACCTTT	TRAC	TRBV6-1	TRBJ2-1	TGTGCCAGCAGTGAAGCGACTTCCTCCTACAATGAGCAGTTCTTC	3	Liver	10046	TRUE	FALSE	FALSE
AAAGCAACATTTGCTT-1-P190604_Liver_1	clone_P190604:9551:2	P190604	P190604_TRAV12-1_TGTGTGGTGATCGCCATCTCAGGAACCTACAAATACATCTTT_TRAJ40:P190604_TRBV6-2_TGTGCCAGCACCCCCACCGAGGGGGCGGGACAGCCCCAGCATTTT_TRBJ1-5	TRAC	TRAV12-1	TRAJ40	TGTGTGGTGATCGCCATCTCAGGAACCTACAAATACATCTTT	TRAC	TRBV6-2	TRBJ1-5	TGTGCCAGCACCCCCACCGAGGGGGCGGGACAGCCCCAGCATTTT	2	Liver	9551	TRUE	FALSE	FALSE
AAAGCAATCTGTGCAA-1-P190604_Liver_1	clone_P190604:9710:2	P190604	P190604_TRAV13-1_TGTGCAGCAAGTAACGCACTTAGGTTTTCAGATGGCCAGAAGCTGCTCTTT_TRAJ16:P190604_TRBV9_TGTGCCAGCAGCACTTTAGCGGACCCAACCTACGAGCAGTACTTC_TRBJ2-7	TRAC	TRAV13-1	TRAJ16	TGTGCAGCAAGTAACGCACTTAGGTTTTCAGATGGCCAGAAGCTGCTCTTT	TRAC	TRBV9	TRBJ2-7	TGTGCCAGCAGCACTTTAGCGGACCCAACCTACGAGCAGTACTTC	2	Liver	9710	TRUE	FALSE	FALSE
AAAGTAGCAAGCCGCT-1-P190604_Liver_1	clone_P190604:10709:1	P190604	P190604_TRAV41_TGTGCTGTCAGATTTTGGAGGAACAGAGATGACAAGATCATCTTT_TRAJ30:P190604_TRBV27_TGTGCCAGCAGTTTATGGGGGGATCACACTGAAGCTTTCTTT_TRBJ1-1	TRAC	TRAV41	TRAJ30	TGTGCTGTCAGATTTTGGAGGAACAGAGATGACAAGATCATCTTT	TRAC	TRBV27	TRBJ1-1	TGTGCCAGCAGTTTATGGGGGGATCACACTGAAGCTTTCTTT	1	Liver	10709	FALSE	FALSE	FALSE
AAATGCCGTCTCCACT-1-P190604_Liver_1	clone_P190604:10528:1	P190604	P190604_TRAV3_TGTGCTGTGAGAGATGCCTCTGGGGGTTACCAGAAAGTTACCTTT_TRAJ13:P190604_TRBV6-2_TGTGCCAGCAGGGAGGGGCATGAGCAGTTCTTC_TRBJ2-1	TRAC	TRAV3	TRAJ13	TGTGCTGTGAGAGATGCCTCTGGGGGTTACCAGAAAGTTACCTTT	TRAC	TRBV6-2	TRBJ2-1	TGTGCCAGCAGGGAGGGGCATGAGCAGTTCTTC	1	Liver	10528	FALSE	FALSE	FALSE
AAATGCCTCCCAAGAT-1-P190604_Liver_1	clone_P190604:9399:2	P190604	P190604_TRAV1-2_TGTGCTGTGAGAGATGGCGACTACAAGCTCAGCTTT_TRAJ20:P190604_TRBV6-4_TGTGCCAGCAGTGAACAGGCTAGCGGGAGAGAGACCCAGTACTTC_TRBJ2-5	TRAC	TRAV1-2	TRAJ20	TGTGCTGTGAGAGATGGCGACTACAAGCTCAGCTTT	TRAC	TRBV6-4	TRBJ2-5	TGTGCCAGCAGTGAACAGGCTAGCGGGAGAGAGACCCAGTACTTC	2	Liver	9399	TRUE	TRUE	FALSE
AACACGTAGCAGACTG-1-P190604_Liver_1	clone_P190604:10756:1	P190604	P190604_TRAV5_TGTGCAGTCCTATACAGCAGTGCTTCCAAGATAATCTTT_TRAJ3:P190604_TRBV6-1_TGTGCCAGCAGTGAAGCGGCAGGGGGCGCGGATACGCAGTATTTT_TRBJ2-3	TRAC	TRAV5	TRAJ3	TGTGCAGTCCTATACAGCAGTGCTTCCAAGATAATCTTT	TRAC	TRBV6-1	TRBJ2-3	TGTGCCAGCAGTGAAGCGGCAGGGGGCGCGGATACGCAGTATTTT	1	Liver	10756	FALSE	FALSE	FALSE
AACACGTAGTGAATTG-1-P190604_Liver_1	clone_P190604:11017:1	P190604	P190604_TRAV9-2_TGTGCTCTGAGTGATCGCCTCGACTACAAGCTCAGCTTT_TRAJ20:P190604_TRBV5-1_TGCGCCAGCAGCTCGGGTGGTGGCACCGGGGAGCTGTTTTTT_TRBJ2-2	TRAC	TRAV9-2	TRAJ20	TGTGCTCTGAGTGATCGCCTCGACTACAAGCTCAGCTTT	TRAC	TRBV5-1	TRBJ2-2	TGCGCCAGCAGCTCGGGTGGTGGCACCGGGGAGCTGTTTTTT	1	Liver	11017	FALSE	FALSE	FALSE
AACACGTTCAACGCTA-1-P190604_Liver_1	clone_P190604:10850:3	P190604	P190604_TRAV8-3_TGTGCTGTGGGTCCTTCTGGTTCTGCAAGGCAACTGACCTTT_TRAJ22:P190604_TRBV4-2_TGTGCCAGCAGCCAATCTTATGATGGAGGTGGCTACACCTTC_TRBJ1-2	TRAC	TRAV8-3	TRAJ22	TGTGCTGTGGGTCCTTCTGGTTCTGCAAGGCAACTGACCTTT	TRAC	TRBV4-2	TRBJ1-2	TGTGCCAGCAGCCAATCTTATGATGGAGGTGGCTACACCTTC	3	Liver	10850	TRUE	FALSE	FALSE
AACCATGAGTGTGGCA-1-P190604_Liver_1	clone_P190604:10132:1	P190604	P190604_TRAV21_TGTGCTGTGAAGGAGGCAGGAACTGCTCTGATCTTT_TRAJ15:P190604_TRBV4-3_TGCGCCAGCAGCCAATGGACTAGCGGGGAGACCCAGTACTTC_TRBJ2-5	TRAC	TRAV21	TRAJ15	TGTGCTGTGAAGGAGGCAGGAACTGCTCTGATCTTT	TRAC	TRBV4-3	TRBJ2-5	TGCGCCAGCAGCCAATGGACTAGCGGGGAGACCCAGTACTTC	1	Liver	10132	FALSE	FALSE	FALSE
AACCATGCAGCTGGCT-1-P190604_Liver_1	clone_P190604:10841:1	P190604	P190604_TRAV8-3_TGTGCTGTGGGCCGGGCGACCGGCACTGCCAGTAAACTCACCTTT_TRAJ44:P190604_TRBV5-1_TGCGCCAGCAGCAAGGGACTAGCGGGGGTGAACACCGGGGAGCTGTTTTTT_TRBJ2-2	TRAC	TRAV8-3	TRAJ44	TGTGCTGTGGGCCGGGCGACCGGCACTGCCAGTAAACTCACCTTT	TRAC	TRBV5-1	TRBJ2-2	TGCGCCAGCAGCAAGGGACTAGCGGGGGTGAACACCGGGGAGCTGTTTTTT	1	Liver	10841	FALSE	FALSE	FALSE
AACCATGCATCCAACA-1-P190604_Liver_1	clone_P190604:10834:1	P190604	P190604_TRAV8-3_TGTGCTGTGGCCCCCCCTTCTGGTGGCTACAATAAGCTGATTTTT_TRAJ4:P190604_TRBV6-1_TGTGCCGCCTCGGGACAGGGCCTCTACGAGCAGTACTTC_TRBJ2-7	TRAC	TRAV8-3	TRAJ4	TGTGCTGTGGCCCCCCCTTCTGGTGGCTACAATAAGCTGATTTTT	TRAC	TRBV6-1	TRBJ2-7	TGTGCCGCCTCGGGACAGGGCCTCTACGAGCAGTACTTC	1	Liver	10834	FALSE	FALSE	FALSE
AACCGCGTCCCATTTA-1-P190604_Liver_1	clone_P190604:9618:1	P190604	P190604_TRAV12-2_TGTGCCGTGAATAATCCGAACACCGGTAACCAGTTCTATTTT_TRAJ49:P190604_TRBV7-2_TGTGCCAGCAGCTCGTACGGGGCCCAAGAGACCCAGTACTTC_TRBJ2-5	TRAC	TRAV12-2	TRAJ49	TGTGCCGTGAATAATCCGAACACCGGTAACCAGTTCTATTTT	TRAC	TRBV7-2	TRBJ2-5	TGTGCCAGCAGCTCGTACGGGGCCCAAGAGACCCAGTACTTC	1	Liver	9618	FALSE	FALSE	FALSE
AACGTTGCATTAGGCT-1-P190604_Liver_1	clone_P190604:10941:1	P190604	P190604_TRAV8-6_TGTGCTGTGAGGGAGGGTGGTGCTACAAACAAGCTCATCTTT_TRAJ32:P190604_TRBV20-1_TGCAGTGCTCAAAGCGGGAGTCGCACAGATACGCAGTATTTT_TRBJ2-3	TRAC	TRAV8-6	TRAJ32	TGTGCTGTGAGGGAGGGTGGTGCTACAAACAAGCTCATCTTT	TRAC	TRBV20-1	TRBJ2-3	TGCAGTGCTCAAAGCGGGAGTCGCACAGATACGCAGTATTTT	1	Liver	10941	FALSE	FALSE	FALSE
AACGTTGGTACCAGTT-1-P190604_Liver_1	clone_P190604:10036:3	P190604	P190604_TRAV2_TGTGCTGTGCCTTACCAGGGAGGAAAGCTTATCTTC_TRAJ23:P190604_TRBV20-1_TGCAGTGCCCCCGGACTAGCGGGAGGGAGGGCAGATACGCAGTATTTT_TRBJ2-3	TRAC	TRAV2	TRAJ23	TGTGCTGTGCCTTACCAGGGAGGAAAGCTTATCTTC	TRAC	TRBV20-1	TRBJ2-3	TGCAGTGCCCCCGGACTAGCGGGAGGGAGGGCAGATACGCAGTATTTT	3	Liver	10036	TRUE	FALSE	FALSE
AACTCAGGTCGCCATG-1-P190604_Liver_1	clone_P190604:10781:1	P190604	P190604_TRAV8-1_TGTGCCGTGAATGCCCTTTCTGGTGGCTACAATAAGCTGATTTTT_TRAJ4:P190604_TRBV5-4_TGTGCCAGCACCGATAAGGGGGGCACCGGGGAGCTGTTTTTT_TRBJ2-2	TRAC	TRAV8-1	TRAJ4	TGTGCCGTGAATGCCCTTTCTGGTGGCTACAATAAGCTGATTTTT	TRAC	TRBV5-4	TRBJ2-2	TGTGCCAGCACCGATAAGGGGGGCACCGGGGAGCTGTTTTTT	1	Liver	10781	FALSE	FALSE	FALSE
AACTCCCAGCTCCTCT-1-P190604_Liver_1	clone_P190604:9611:6	P190604	P190604_TRAV12-2_TGTGCCGTGAACGGGGCTTCTGGTTCTGCAAGGCAACTGACCTTT_TRAJ22:P190604_TRBV6-1_TGTGCCAGCACCGGGACAGGGCTTAACGAGCAGTACTTC_TRBJ2-7	TRAC	TRAV12-2	TRAJ22	TGTGCCGTGAACGGGGCTTCTGGTTCTGCAAGGCAACTGACCTTT	TRAC	TRBV6-1	TRBJ2-7	TGTGCCAGCACCGGGACAGGGCTTAACGAGCAGTACTTC	6	Liver	9611	TRUE	FALSE	FALSE
AACTCCCCACGGCTAC-1-P190604_Liver_1	clone_P190604:9915:8	P190604	P190604_TRAV17_TGTGCTACGGACGCCTTATCAGGAACCTACAAATACATCTTT_TRAJ40:P190604_TRBV13_TGTGCCAGCAGCTTAGGGCCCCCACTAGCGGGACAATACGAGCAGTACTTC_TRBJ2-7	TRAC	TRAV17	TRAJ40	TGTGCTACGGACGCCTTATCAGGAACCTACAAATACATCTTT	TRAC	TRBV13	TRBJ2-7	TGTGCCAGCAGCTTAGGGCCCCCACTAGCGGGACAATACGAGCAGTACTTC	8	Liver	9915	TRUE	FALSE	FALSE
AACTGGTTCCATGAGT-1-P190604_Liver_1	clone_P190604:9630:1	P190604	P190604_TRAV12-2_TGTGCCGTGAGGCCTGGGGGTTACCAGAAAGTTACCTTT_TRAJ13:P190604_TRBV28_TGTGCCAGCAGCTGGGGGGGTGACCGGGTCGAGCAGTACTTC_TRBJ2-7	TRAC	TRAV12-2	TRAJ13	TGTGCCGTGAGGCCTGGGGGTTACCAGAAAGTTACCTTT	TRAC	TRBV28	TRBJ2-7	TGTGCCAGCAGCTGGGGGGGTGACCGGGTCGAGCAGTACTTC	1	Liver	9630	FALSE	FALSE	FALSE
AACTTTCAGATGTAAC-1-P190604_Liver_1	clone_P190604:9762:1	P190604	P190604_TRAV13-1_TGTGCGGCAATAGATTCAGGAGGAGGTGCTGACGGACTCACCTTT_TRAJ45:P190604_TRBV28_TGTGCCAGCAGCCCCGGGTGGCGAACTAATGAAAAACTGTTTTTT_TRBJ1-4	TRAC	TRAV13-1	TRAJ45	TGTGCGGCAATAGATTCAGGAGGAGGTGCTGACGGACTCACCTTT	TRAC	TRBV28	TRBJ1-4	TGTGCCAGCAGCCCCGGGTGGCGAACTAATGAAAAACTGTTTTTT	1	Liver	9762	FALSE	FALSE	FALSE
AACTTTCCAGTATGCT-1-P190604_Liver_1	clone_P190604:9386:2	P190604	P190604_TRAV1-2_TGTGCTGTGAGAGATAGCAACTATCAGTTAATCTGG_TRAJ33:P190604_TRBV6-4_TGTGCCAGCAGTGAGGGGGCGAACACTGAAGCTTTCTTT_TRBJ1-1	TRAC	TRAV1-2	TRAJ33	TGTGCTGTGAGAGATAGCAACTATCAGTTAATCTGG	TRAC	TRBV6-4	TRBJ1-1	TGTGCCAGCAGTGAGGGGGCGAACACTGAAGCTTTCTTT	2	Liver	9386	TRUE	TRUE	FALSE
AAGACCTAGGCTAGCA-1-P190604_Liver_1	clone_P190604:10534:1	P190604	P190604_TRAV3_TGTGCTGTGAGAGGGCTTTACACGGGCAGGAGAGCACTTACTTTT_TRAJ5:P190604_TRBV19_TGTGCCAGTGCCGATACTGTGGGGGGGGAACTCCTCGAGCAGTACTTC_TRBJ2-7	TRAC	TRAV3	TRAJ5	TGTGCTGTGAGAGGGCTTTACACGGGCAGGAGAGCACTTACTTTT	TRAC	TRBV19	TRBJ2-7	TGTGCCAGTGCCGATACTGTGGGGGGGGAACTCCTCGAGCAGTACTTC	1	Liver	10534	FALSE	FALSE	FALSE
AAGACCTTCATCGCTC-1-P190604_Liver_1	clone_P190604:10620:1	P190604	P190604_TRAV38-1_TGTGCTTTCGTGGAGGTGATCAAAGCTGCAGGCAACAAGCTAACTTTT_TRAJ17:P190604_TRBV5-1_TGCGCCAGCAGCCCGGGACTAGCGGTGACTAGCACAGATACGCAGTATTTT_TRBJ2-3	TRAC	TRAV38-1	TRAJ17	TGTGCTTTCGTGGAGGTGATCAAAGCTGCAGGCAACAAGCTAACTTTT	TRAC	TRBV5-1	TRBJ2-3	TGCGCCAGCAGCCCGGGACTAGCGGTGACTAGCACAGATACGCAGTATTTT	1	Liver	10620	FALSE	FALSE	FALSE
AAGCCGCCACCGAAAG-1-P190604_Liver_1	clone_P190604:10281:1	P190604	P190604_TRAV25_TGTGCAGGGTGGAGGGGAGGAGGTGCTGACGGACTCACCTTT_TRAJ45:P190604_TRBV3-1_TGTGCCAGCAGCCCCTCTAGCGGGAGGTATGAGCAGTTCTTC_TRBJ2-1	TRAC	TRAV25	TRAJ45	TGTGCAGGGTGGAGGGGAGGAGGTGCTGACGGACTCACCTTT	TRAC	TRBV3-1	TRBJ2-1	TGTGCCAGCAGCCCCTCTAGCGGGAGGTATGAGCAGTTCTTC	1	Liver	10281	FALSE	FALSE	FALSE
AAGCCGCCACGGTAGA-1-P190604_Liver_1	clone_P190604:10461:8	P190604	P190604_TRAV29/DV5_TGTGCAGCAGAAGGAGGAGGTGCTGACGGACTCACCTTT_TRAJ45:P190604_TRBV7-8_TGTGCCAGCAGCTTAGTTCCGGAGCGGTCCTCCTACGAGCAGTACTTC_TRBJ2-7	TRAC	TRAV29/DV5	TRAJ45	TGTGCAGCAGAAGGAGGAGGTGCTGACGGACTCACCTTT	TRAC	TRBV7-8	TRBJ2-7	TGTGCCAGCAGCTTAGTTCCGGAGCGGTCCTCCTACGAGCAGTACTTC	8	Liver	10461	TRUE	FALSE	FALSE
AAGCCGCCATGAAGTA-1-P190604_Liver_1	clone_P190604:10408:2	P190604	P190604_TRAV29/DV5_TGTGCAGCAAGCCCCAAGGGCAATGACATGCGCTTT_TRAJ43:P190604_TRBV9_TGTGCCAGCAGCGTAGGTTGGGGAAACACTGAAGCTTTCTTT_TRBJ1-1	TRAC	TRAV29/DV5	TRAJ43	TGTGCAGCAAGCCCCAAGGGCAATGACATGCGCTTT	TRAC	TRBV9	TRBJ1-1	TGTGCCAGCAGCGTAGGTTGGGGAAACACTGAAGCTTTCTTT	2	Liver	10408	TRUE	FALSE	FALSE
AAGCCGCTCAGCGACC-1-P190604_Liver_1	clone_P190604:9334:1	P190604	P190604_TRAV1-2_TGTGCTGCGTTGGATAGCAACTATCAGTTAATCTGG_TRAJ33:P190604_TRBV4-2_TGTGCCAGCAGCCAAGCGCGCGGGAGTGGAAGGGACGAGCAGTACTTC_TRBJ2-7	TRAC	TRAV1-2	TRAJ33	TGTGCTGCGTTGGATAGCAACTATCAGTTAATCTGG	TRAC	TRBV4-2	TRBJ2-7	TGTGCCAGCAGCCAAGCGCGCGGGAGTGGAAGGGACGAGCAGTACTTC	1	Liver	9334	FALSE	TRUE	FALSE
AAGCCGCTCGACAGCC-1-P190604_Liver_1	clone_P190604:10628:4	P190604	P190604_TRAV38-2/DV8_TGTGCTTATAGGAGCCGGAACAATGACATGCGCTTT_TRAJ43:P190604_TRBV27_TGTGCCAGCAGTTGGTCCAGCGGGCGCTACAATGAGCAGTTCTTC_TRBJ2-1	TRAC	TRAV38-2/DV8	TRAJ43	TGTGCTTATAGGAGCCGGAACAATGACATGCGCTTT	TRAC	TRBV27	TRBJ2-1	TGTGCCAGCAGTTGGTCCAGCGGGCGCTACAATGAGCAGTTCTTC	4	Liver	10628	TRUE	FALSE	FALSE
AAGCCGCTCGCCTGAG-1-P190604_Liver_1	clone_P190604:10143:3	P190604	P190604_TRAV21_TGTGCTGTGAGCGGCAACTATCAGTTAATCTGG_TRAJ33:P190604_TRBV12-4_TGTGCCAGCAGTCCCGGGACTCTCGGGGGGGACGAGCAGTACTTC_TRBJ2-7	TRAC	TRAV21	TRAJ33	TGTGCTGTGAGCGGCAACTATCAGTTAATCTGG	TRAC	TRBV12-4	TRBJ2-7	TGTGCCAGCAGTCCCGGGACTCTCGGGGGGGACGAGCAGTACTTC	3	Liver	10143	TRUE	FALSE	FALSE
AAGGAGCAGCGCTCCA-1-P190604_Liver_1	clone_P190604:10022:1	P190604	P190604_TRAV19_TGTGCTCTGAGTTTTTATGGTCAGAATTTTGTCTTT_TRAJ26:P190604_TRBV20-1_TGCAGTGCTAGGGGATATACAAAGCGGGAGGGCCAAGAGACCCAGTACTTC_TRBJ2-5	TRAC	TRAV19	TRAJ26	TGTGCTCTGAGTTTTTATGGTCAGAATTTTGTCTTT	TRAC	TRBV20-1	TRBJ2-5	TGCAGTGCTAGGGGATATACAAAGCGGGAGGGCCAAGAGACCCAGTACTTC	1	Liver	10022	FALSE	FALSE	FALSE
AAGGCAGCACGACGAA-1-P190604_Liver_1	clone_P190604:9855:1	P190604	P190604_TRAV14/DV4_TGTGCAATGAGATTCACCGGTAACCAGTTCTATTTT_TRAJ49:P190604_TRBV6-2_TGTGCCAGCAGTTACGGGGCTAGCGGGAGTTTCGGCGAGCAGTACTTC_TRBJ2-7	TRAC	TRAV14/DV4	TRAJ49	TGTGCAATGAGATTCACCGGTAACCAGTTCTATTTT	TRAC	TRBV6-2	TRBJ2-7	TGTGCCAGCAGTTACGGGGCTAGCGGGAGTTTCGGCGAGCAGTACTTC	1	Liver	9855	FALSE	FALSE	FALSE
AAGGCAGTCCTCATTA-1-P190604_Liver_1	clone_P190604:9612:1	P190604	P190604_TRAV12-2_TGTGCCGTGAACGTGGGGCAGGCAGGAACTGCTCTGATCTTT_TRAJ15:P190604_TRBV6-2_TGTGCCAGCAGCACCTCGGACGGGGCCACTGAAGCTTTCTTT_TRBJ1-1	TRAC	TRAV12-2	TRAJ15	TGTGCCGTGAACGTGGGGCAGGCAGGAACTGCTCTGATCTTT	TRAC	TRBV6-2	TRBJ1-1	TGTGCCAGCAGCACCTCGGACGGGGCCACTGAAGCTTTCTTT	1	Liver	9612	FALSE	FALSE	FALSE
AAGGTTCTCCTATGTT-1-P190604_Liver_1	clone_P190604:9849:1	P190604	P190604_TRAV14/DV4_TGTGCAATGAGAGATGAGGGGGCTACCTCAGGAACCTACAAATACATCTTT_TRAJ40:P190604_TRBV29-1_TGCAGCGCCATAGGACAGGGGCGGGGGGCTTTCTTT_TRBJ1-1	TRAC	TRAV14/DV4	TRAJ40	TGTGCAATGAGAGATGAGGGGGCTACCTCAGGAACCTACAAATACATCTTT	TRAC	TRBV29-1	TRBJ1-1	TGCAGCGCCATAGGACAGGGGCGGGGGGCTTTCTTT	1	Liver	9849	FALSE	FALSE	FALSE
AAGTCTGAGCTCCTCT-1-P190604_Liver_1	clone_P190604:9575:2	P190604	P190604_TRAV12-2_TGTGCCGGCGATATATCAGGAGGAAGCTACATACCTACATTT_TRAJ6:P190604_TRBV9_TGTGCCAGCAGCGGAACGGACGATGAAAAACTGTTTTTT_TRBJ1-4	TRAC	TRAV12-2	TRAJ6	TGTGCCGGCGATATATCAGGAGGAAGCTACATACCTACATTT	TRAC	TRBV9	TRBJ1-4	TGTGCCAGCAGCGGAACGGACGATGAAAAACTGTTTTTT	2	Liver	9575	TRUE	FALSE	FALSE
AAGTCTGCAAGAAAGG-1-P190604_Liver_1	clone_P190604:10306:1	P190604	P190604_TRAV26-1_TGCATCGTCAGAGTAAACACCGGTAACCAGTTCTATTTT_TRAJ49:P190604_TRBV12-3_TGTGCCAGCAGTTTAGAGGGATTCAATCAGCCCCAGCATTTT_TRBJ1-5	TRAC	TRAV26-1	TRAJ49	TGCATCGTCAGAGTAAACACCGGTAACCAGTTCTATTTT	TRAC	TRBV12-3	TRBJ1-5	TGTGCCAGCAGTTTAGAGGGATTCAATCAGCCCCAGCATTTT	1	Liver	10306	FALSE	FALSE	FALSE
AAGTCTGGTACTTCTT-1-P190604_Liver_1	clone_P190604:10685:1	P190604	P190604_TRAV4_TGCCTCGTGGGTGACTCCTCAACTGACAGCTGGGGGAAATTGCAGTTT_TRAJ24:P190604_TRBV4-3_TGCGCCAGCAGCCCCGAAAGAGGGTCCGGGGCCAACGTCCTGACTTTC_TRBJ2-6	TRAC	TRAV4	TRAJ24	TGCCTCGTGGGTGACTCCTCAACTGACAGCTGGGGGAAATTGCAGTTT	TRAC	TRBV4-3	TRBJ2-6	TGCGCCAGCAGCCCCGAAAGAGGGTCCGGGGCCAACGTCCTGACTTTC	1	Liver	10685	FALSE	FALSE	FALSE
AATCCAGCAAGCGTAG-1-P190604_Liver_1	clone_P190604:9486:2	P190604	P190604_TRAV1-2_TGTGTTACCTTGGATAGCAACTATCAGTTAATCTGG_TRAJ33:P190604_TRBV6-1_TGTGCCAGCGGGGAGGGGATCCTGAACACTGAAGCTTTCTTT_TRBJ1-1	TRAC	TRAV1-2	TRAJ33	TGTGTTACCTTGGATAGCAACTATCAGTTAATCTGG	TRAC	TRBV6-1	TRBJ1-1	TGTGCCAGCGGGGAGGGGATCCTGAACACTGAAGCTTTCTTT	2	Liver	9486	TRUE	TRUE	FALSE
AATCCAGGTAATAGCA-1-P190604_Liver_1	clone_P190604:10160:1	P190604	P190604_TRAV21_TGTGCTGTGATCTCACTGAACAATGCCAGACTCATGTTT_TRAJ31:P190604_TRBV11-3_TGTGCCAGCAGCTCTCGAGATAGCGGCTCCTACAATGAGCAGTTCTTC_TRBJ2-1	TRAC	TRAV21	TRAJ31	TGTGCTGTGATCTCACTGAACAATGCCAGACTCATGTTT	TRAC	TRBV11-3	TRBJ2-1	TGTGCCAGCAGCTCTCGAGATAGCGGCTCCTACAATGAGCAGTTCTTC	1	Liver	10160	FALSE	FALSE	FALSE
AATCCAGGTGAGGGAG-1-P190604_Liver_1	clone_P190604:10937:3	P190604	P190604_TRAV8-6_TGTGCTGCATTTTATCCGGGTGGTGGCTACAATAAGCTGATTTTT_TRAJ4:P190604_TRBV10-2_TGCGCCAGCAGCGGGGTTTTCCGCGGGGAAGCTTTCTTT_TRBJ1-1	TRAC	TRAV8-6	TRAJ4	TGTGCTGCATTTTATCCGGGTGGTGGCTACAATAAGCTGATTTTT	TRAC	TRBV10-2	TRBJ1-1	TGCGCCAGCAGCGGGGTTTTCCGCGGGGAAGCTTTCTTT	3	Liver	10937	TRUE	FALSE	FALSE
AATCCAGGTGTAACGG-1-P190604_Liver_1	clone_P190604:9302:2	P190604	P190604_TRAV1-1_TGCGCTGTGAGAGATCAAAATGCCAGACTCATGTTT_TRAJ31:P190604_TRBV6-1_TGTGCCAGCAGTGAAATATGGGGGGGAGGCAAAAACATTCAGTACTTC_TRBJ2-4	TRAC	TRAV1-1	TRAJ31	TGCGCTGTGAGAGATCAAAATGCCAGACTCATGTTT	TRAC	TRBV6-1	TRBJ2-4	TGTGCCAGCAGTGAAATATGGGGGGGAGGCAAAAACATTCAGTACTTC	2	Liver	9302	TRUE	FALSE	FALSE
AATCGGTAGTGTACCT-1-P190604_Liver_1	clone_P190604:9795:4	P190604	P190604_TRAV13-2_TGTGCAGAGAGTCAATATGCTGGTGGTACTAGCTATGGAAAGCTGACATTT_TRAJ52:P190604_TRBV27_TGTGCCAGCAGTCCCGGGATTAGGACTGAAGCTTTCTTT_TRBJ1-1	TRAC	TRAV13-2	TRAJ52	TGTGCAGAGAGTCAATATGCTGGTGGTACTAGCTATGGAAAGCTGACATTT	TRAC	TRBV27	TRBJ1-1	TGTGCCAGCAGTCCCGGGATTAGGACTGAAGCTTTCTTT	4	Liver	9795	TRUE	FALSE	FALSE
AATCGGTCATCACGAT-1-P190604_Liver_1	clone_P190604:10224:1	P190604	P190604_TRAV23/DV6_TGTGCAGCAAGGGTCGGGAACAATGACATGCGCTTT_TRAJ43:P190604_TRBV28_TGTGCCAGCAGTCCGGGGACCTACGAGCAGTACTTC_TRBJ2-7	TRAC	TRAV23/DV6	TRAJ43	TGTGCAGCAAGGGTCGGGAACAATGACATGCGCTTT	TRAC	TRBV28	TRBJ2-7	TGTGCCAGCAGTCCGGGGACCTACGAGCAGTACTTC	1	Liver	10224	FALSE	FALSE	FALSE
AATCGGTTCAGAAATG-1-P190604_Liver_1	clone_P190604:9446:9	P190604	P190604_TRAV1-2_TGTGCTGTGATGGATAGCAGCTATAAATTGATCTTC_TRAJ12:P190604_TRBV25-1_TGTGCCAGCAGTGACGGGAGGGACACCGGGGAGCTGTTTTTT_TRBJ2-2	TRAC	TRAV1-2	TRAJ12	TGTGCTGTGATGGATAGCAGCTATAAATTGATCTTC	TRAC	TRBV25-1	TRBJ2-2	TGTGCCAGCAGTGACGGGAGGGACACCGGGGAGCTGTTTTTT	9	Liver	9446	TRUE	TRUE	FALSE
ACACCAACATATACGC-1-P190604_Liver_1	clone_P190604:10601:1	P190604	P190604_TRAV36/DV7_TGTGCTGTGGCCCCAACCTCAGGAACCTACAAATACATCTTT_TRAJ40:P190604_TRBV20-1_TGCAGTGCTAGAGGTCTGCTTATGAACACTGAAGCTTTCTTT_TRBJ1-1	TRAC	TRAV36/DV7	TRAJ40	TGTGCTGTGGCCCCAACCTCAGGAACCTACAAATACATCTTT	TRAC	TRBV20-1	TRBJ1-1	TGCAGTGCTAGAGGTCTGCTTATGAACACTGAAGCTTTCTTT	1	Liver	10601	FALSE	FALSE	FALSE
ACACCAACATCGACGC-1-P190604_Liver_1	clone_P190604:10245:2	P190604	P190604_TRAV24_TGTGCCGGGAGCGGTGGTACTAGCTATGGAAAGCTGACATTT_TRAJ52:P190604_TRBV27_TGTGCCAGCAGCCCTGGGGCTTTCGGTTACAATGAGCAGTTCTTC_TRBJ2-1	TRAC	TRAV24	TRAJ52	TGTGCCGGGAGCGGTGGTACTAGCTATGGAAAGCTGACATTT	TRAC	TRBV27	TRBJ2-1	TGTGCCAGCAGCCCTGGGGCTTTCGGTTACAATGAGCAGTTCTTC	2	Liver	10245	TRUE	FALSE	FALSE
ACACCAAGTCTTGCGG-1-P190604_Liver_1	clone_P190604:9830:3	P190604	P190604_TRAV14/DV4_TGTGCAATGAGAGAGGGCAGACAGGGAGCCCAGAAGCTGGTATTT_TRAJ54:P190604_TRBV11-2_TGTGCCAGCAAGGGGGCGGCTAATGAAAAACTGTTTTTT_TRBJ1-4	TRAC	TRAV14/DV4	TRAJ54	TGTGCAATGAGAGAGGGCAGACAGGGAGCCCAGAAGCTGGTATTT	TRAC	TRBV11-2	TRBJ1-4	TGTGCCAGCAAGGGGGCGGCTAATGAAAAACTGTTTTTT	3	Liver	9830	TRUE	FALSE	FALSE
ACACCAATCACCATAG-1-P190604_Liver_1	clone_P190604:9335:1	P190604	P190604_TRAV1-2_TGTGCTGCTATGGATAGCAACTATCAGTTAATCTGG_TRAJ33:P190604_TRBV19_TGTGCCAGTAGTATAGGGGAAGGGACTGGGGCCAACGTCCTGACTTTC_TRBJ2-6	TRAC	TRAV1-2	TRAJ33	TGTGCTGCTATGGATAGCAACTATCAGTTAATCTGG	TRAC	TRBV19	TRBJ2-6	TGTGCCAGTAGTATAGGGGAAGGGACTGGGGCCAACGTCCTGACTTTC	1	Liver	9335	FALSE	TRUE	FALSE
ACACCAATCCAAACTG-1-P190604_Liver_1	clone_P190604:10971:1	P190604	P190604_TRAV9-2_TGTGCTCCTCTGAACAGAGATGACAAGATCATCTTT_TRAJ30:P190604_TRBV18_TGTGCCAGCTCGGGGATGAACACCGGGGAGCTGTTTTTT_TRBJ2-2	TRAC	TRAV9-2	TRAJ30	TGTGCTCCTCTGAACAGAGATGACAAGATCATCTTT	TRAC	TRBV18	TRBJ2-2	TGTGCCAGCTCGGGGATGAACACCGGGGAGCTGTTTTTT	1	Liver	10971	FALSE	FALSE	FALSE
ACACCCTAGATGTGTA-1-P190604_Liver_1	clone_P190604:9300:1	P190604	P190604_TRAV1-1_TGCGCTGTGAGAGACTCAGGAGGAGGTGCTGACGGACTCACCTTT_TRAJ45:P190604_TRBV4-1_TGCGCCAGCAGCCAAGGTGCTCTAGCTGGGACTGGGTCCTACAATGAGCAGTTCTTC_TRBJ2-1	TRAC	TRAV1-1	TRAJ45	TGCGCTGTGAGAGACTCAGGAGGAGGTGCTGACGGACTCACCTTT	TRAC	TRBV4-1	TRBJ2-1	TGCGCCAGCAGCCAAGGTGCTCTAGCTGGGACTGGGTCCTACAATGAGCAGTTCTTC	1	Liver	9300	FALSE	FALSE	FALSE
ACACCCTGTACCGGCT-1-P190604_Liver_1	clone_P190604:10056:5	P190604	P190604_TRAV2_TGTGCTGTGGAGGGGTGGTCTGGTGGCTACAATAAGCTGATTTTT_TRAJ4:P190604_TRBV7-9_TGTGCCAGCAGCTTAGACCAACACAATGAGCAGTTCTTC_TRBJ2-1	TRAC	TRAV2	TRAJ4	TGTGCTGTGGAGGGGTGGTCTGGTGGCTACAATAAGCTGATTTTT	TRAC	TRBV7-9	TRBJ2-1	TGTGCCAGCAGCTTAGACCAACACAATGAGCAGTTCTTC	5	Liver	10056	TRUE	FALSE	FALSE
ACACTGAAGGCCCTTG-1-P190604_Liver_1	clone_P190604:9299:6	P190604	P190604_TRAV1-1_TGCGCTGTGACCAACCAGGCAGGAACTGCTCTGATCTTT_TRAJ15:P190604_TRBV6-4_TGTGCCAGCAGTGACGGGACTAGCGGGAGCACAGATACGCAGTATTTT_TRBJ2-3	TRAC	TRAV1-1	TRAJ15	TGCGCTGTGACCAACCAGGCAGGAACTGCTCTGATCTTT	TRAC	TRBV6-4	TRBJ2-3	TGTGCCAGCAGTGACGGGACTAGCGGGAGCACAGATACGCAGTATTTT	6	Liver	9299	TRUE	FALSE	FALSE
ACACTGAGTCCATCCT-1-P190604_Liver_1	clone_P190604:9639:1	P190604	P190604_TRAV12-2_TGTGCCGTGGGAGGGTCTAGCAACACAGGCAAACTAATCTTT_TRAJ37:P190604_TRBV7-9_TGTGCCAGCAGCTCGGGGCCCTACGAGCAGTACTTC_TRBJ2-7	TRAC	TRAV12-2	TRAJ37	TGTGCCGTGGGAGGGTCTAGCAACACAGGCAAACTAATCTTT	TRAC	TRBV7-9	TRBJ2-7	TGTGCCAGCAGCTCGGGGCCCTACGAGCAGTACTTC	1	Liver	9639	FALSE	FALSE	FALSE
ACACTGAGTGCTCTTC-1-P190604_Liver_1	clone_P190604:9493:1	P190604	P190604_TRAV10_TGTGTGGTGAGCGAGGGGAACACAGGCTTTCAGAAACTTGTATTT_TRAJ8:P190604_TRBV6-1_TGTGCCAGCACTTTATCAGTGAACACTGAAGCTTTCTTT_TRBJ1-1	TRAC	TRAV10	TRAJ8	TGTGTGGTGAGCGAGGGGAACACAGGCTTTCAGAAACTTGTATTT	TRAC	TRBV6-1	TRBJ1-1	TGTGCCAGCACTTTATCAGTGAACACTGAAGCTTTCTTT	1	Liver	9493	FALSE	FALSE	FALSE
ACAGCCGCATAACCTG-1-P190604_Liver_1	clone_P190604:9913:1	P190604	P190604_TRAV17_TGTGCTACGGACGCACGTTATGGAAACAAGCTGGTCTTT_TRAJ47:P190604_TRBV30_TGTGCCTGGAGTTTGCGGGCAGGGAATTCACCCCTCCACTTT_TRBJ1-6	TRAC	TRAV17	TRAJ47	TGTGCTACGGACGCACGTTATGGAAACAAGCTGGTCTTT	TRAC	TRBV30	TRBJ1-6	TGTGCCTGGAGTTTGCGGGCAGGGAATTCACCCCTCCACTTT	1	Liver	9913	FALSE	FALSE	FALSE
ACAGCCGGTAGCCTCG-1-P190604_Liver_1	clone_P190604:10814:7	P190604	P190604_TRAV8-2_TGTGTTGTGAGTGATGGTTATGGTGGTGCTACAAACAAGCTCATCTTT_TRAJ32:P190604_TRBV5-8_TGTGCCAGCAGCGTGGGGCCTGGGCGGGAGGGCGAAGAGACCCAGTACTTC_TRBJ2-5	TRAC	TRAV8-2	TRAJ32	TGTGTTGTGAGTGATGGTTATGGTGGTGCTACAAACAAGCTCATCTTT	TRAC	TRBV5-8	TRBJ2-5	TGTGCCAGCAGCGTGGGGCCTGGGCGGGAGGGCGAAGAGACCCAGTACTTC	7	Liver	10814	TRUE	FALSE	FALSE
ACAGCCGTCAGTTTGG-1-P190604_Liver_1	clone_P190604:10212:1	P190604	P190604_TRAV23/DV6_TGTGCAGCAAGCATAAGGGCAGGCAACATGCTCACCTTT_TRAJ39:P190604_TRBV9_TGTGCCAGCAGCGTAGGAGACATATCACCCTCTGGGGCCAACGTCCTGACTTTC_TRBJ2-6	TRAC	TRAV23/DV6	TRAJ39	TGTGCAGCAAGCATAAGGGCAGGCAACATGCTCACCTTT	TRAC	TRBV9	TRBJ2-6	TGTGCCAGCAGCGTAGGAGACATATCACCCTCTGGGGCCAACGTCCTGACTTTC	1	Liver	10212	FALSE	FALSE	FALSE
ACAGCCGTCTGGAGCC-1-P190604_Liver_1	clone_P190604:9923:1	P190604	P190604_TRAV17_TGTGCTACGGACGCTGATAATGCAGGCAACATGCTCACCTTT_TRAJ39:P190604_TRBV19_TGTGCCAGTAGTATAAGACTCTCTAGGTACACAGATACGCAGTATTTT_TRBJ2-3	TRAC	TRAV17	TRAJ39	TGTGCTACGGACGCTGATAATGCAGGCAACATGCTCACCTTT	TRAC	TRBV19	TRBJ2-3	TGTGCCAGTAGTATAAGACTCTCTAGGTACACAGATACGCAGTATTTT	1	Liver	9923	FALSE	FALSE	FALSE
ACAGCTACACCAGTTA-1-P190604_Liver_1	clone_P190604:10735:1	P190604	P190604_TRAV5_TGTGCAGAGAGCCTTAACACCGACAAGCTCATCTTT_TRAJ34:P190604_TRBV7-3_TGTGCCACTCCGTCGCGGGCTAGCGGCTTCTACGAGCAGTACTTC_TRBJ2-7	TRAC	TRAV5	TRAJ34	TGTGCAGAGAGCCTTAACACCGACAAGCTCATCTTT	TRAC	TRBV7-3	TRBJ2-7	TGTGCCACTCCGTCGCGGGCTAGCGGCTTCTACGAGCAGTACTTC	1	Liver	10735	FALSE	FALSE	FALSE
ACAGCTAGTGACCAAG-1-P190604_Liver_1	clone_P190604:10776:1	P190604	P190604_TRAV8-1_TGTGCCGTGAAGAATTATGGAGGAAGCCAAGGAAATCTCATCTTT_TRAJ42:P190604_TRBV7-9_TGTGCCAGCAGCCCCCCTGGGAGCGCGTTCCAGGATGAGCAGTTCTTC_TRBJ2-1	TRAC	TRAV8-1	TRAJ42	TGTGCCGTGAAGAATTATGGAGGAAGCCAAGGAAATCTCATCTTT	TRAC	TRBV7-9	TRBJ2-1	TGTGCCAGCAGCCCCCCTGGGAGCGCGTTCCAGGATGAGCAGTTCTTC	1	Liver	10776	FALSE	FALSE	FALSE
ACATACGCAGACGTAG-1-P190604_Liver_1	clone_P190604:10882:6	P190604	P190604_TRAV8-4_TGTGCTGTCACTACCTCAGGAACCTACAAATACATCTTT_TRAJ40:P190604_TRBV20-1_TGCAGTGCTAGAGTGCAACGGGACGATCTGCTCGAGCAGTACTTC_TRBJ2-7	TRAC	TRAV8-4	TRAJ40	TGTGCTGTCACTACCTCAGGAACCTACAAATACATCTTT	TRAC	TRBV20-1	TRBJ2-7	TGCAGTGCTAGAGTGCAACGGGACGATCTGCTCGAGCAGTACTTC	6	Liver	10882	TRUE	FALSE	FALSE
ACATACGTCACTTCAT-1-P190604_Liver_1	clone_P190604:10590:2	P190604	P190604_TRAV35_TGTGCTGGGCGAAGTAACTTCAACAAATTTTACTTT_TRAJ21:P190604_TRBV28_TGTGCCAGCAGTTCCTCGACAGGGCGAGAGCAGTACTTC_TRBJ2-7	TRAC	TRAV35	TRAJ21	TGTGCTGGGCGAAGTAACTTCAACAAATTTTACTTT	TRAC	TRBV28	TRBJ2-7	TGTGCCAGCAGTTCCTCGACAGGGCGAGAGCAGTACTTC	2	Liver	10590	TRUE	FALSE	FALSE
ACATCAGAGACGACGT-1-P190604_Liver_1	clone_P190604:9637:5	P190604	P190604_TRAV12-2_TGTGCCGTGGATTCGAACTCAAATTCCGGGTATGCACTCAACTTC_TRAJ41:P190604_TRBV7-3_TGTGCCAGCAGCTTAAGACAGGGCGTGGAGGATACGCAGTATTTT_TRBJ2-3	TRAC	TRAV12-2	TRAJ41	TGTGCCGTGGATTCGAACTCAAATTCCGGGTATGCACTCAACTTC	TRAC	TRBV7-3	TRBJ2-3	TGTGCCAGCAGCTTAAGACAGGGCGTGGAGGATACGCAGTATTTT	5	Liver	9637	TRUE	FALSE	FALSE
ACATGGTAGTAGTGCG-1-P190604_Liver_1	clone_P190604:9986:2	P190604	P190604_TRAV19_TGTGCTCTGAGTGAGCCACCCACCGGTAACCAGTTCTATTTT_TRAJ49:P190604_TRBV6-5_TGTGCCAGCAGCCTACTACCAGGGGCTGAAGCTTTCTTT_TRBJ1-1	TRAC	TRAV19	TRAJ49	TGTGCTCTGAGTGAGCCACCCACCGGTAACCAGTTCTATTTT	TRAC	TRBV6-5	TRBJ1-1	TGTGCCAGCAGCCTACTACCAGGGGCTGAAGCTTTCTTT	2	Liver	9986	TRUE	FALSE	FALSE
ACATGGTCATCCGCGA-1-P190604_Liver_1	clone_P190604:9998:1	P190604	P190604_TRAV19_TGTGCTCTGAGTGAGGCGAGTTTGGAGAGTGACATGCGCTTT_TRAJ43:P190604_TRBV7-9_TGTGCCAGCAGCTTAGGGGGACTAGCGGGACCAATTCGTCAAGAGGGAAATGAGCAGTTCTTC_TRBJ2-1	TRAC	TRAV19	TRAJ43	TGTGCTCTGAGTGAGGCGAGTTTGGAGAGTGACATGCGCTTT	TRAC	TRBV7-9	TRBJ2-1	TGTGCCAGCAGCTTAGGGGGACTAGCGGGACCAATTCGTCAAGAGGGAAATGAGCAGTTCTTC	1	Liver	9998	FALSE	FALSE	FALSE
ACATGGTGTACCAGTT-1-P190604_Liver_1	clone_P190604:9388:1	P190604	P190604_TRAV1-2_TGTGCTGTGAGAGATATGAGCTTTGGGAATGTGCTGCATTGC_TRAJ35:P190604_TRBV3-1_TGTGCCAGCAGCCAAGTAGGACAGGGGATACAAGAGACCCAGTACTTC_TRBJ2-5	TRAC	TRAV1-2	TRAJ35	TGTGCTGTGAGAGATATGAGCTTTGGGAATGTGCTGCATTGC	TRAC	TRBV3-1	TRBJ2-5	TGTGCCAGCAGCCAAGTAGGACAGGGGATACAAGAGACCCAGTACTTC	1	Liver	9388	FALSE	FALSE	FALSE
ACCAGTAGTCTCACCT-1-P190604_Liver_1	clone_P190604:9501:1	P190604	P190604_TRAV12-1_TGTGTGGAGAGAGGGAACAACAGACTCGCTTTT_TRAJ7:P190604_TRBV20-1_TGCAGTGCTAGCCGCCTCGGGACAGACTTTAATGAGCAGTTCTTC_TRBJ2-1	TRAC	TRAV12-1	TRAJ7	TGTGTGGAGAGAGGGAACAACAGACTCGCTTTT	TRAC	TRBV20-1	TRBJ2-1	TGCAGTGCTAGCCGCCTCGGGACAGACTTTAATGAGCAGTTCTTC	1	Liver	9501	FALSE	FALSE	FALSE
ACCAGTAGTGCCTGCA-1-P190604_Liver_1	clone_P190604:9351:1	P190604	P190604_TRAV1-2_TGTGCTGTCTTGGATAGCAACTATCAGTTAATCTGG_TRAJ33:P190604_TRBV6-1_TGTGCCAGCAGTGGGGGGGGCGGCAATCAGCCCCAGCATTTT_TRBJ1-5	TRAC	TRAV1-2	TRAJ33	TGTGCTGTCTTGGATAGCAACTATCAGTTAATCTGG	TRAC	TRBV6-1	TRBJ1-5	TGTGCCAGCAGTGGGGGGGGCGGCAATCAGCCCCAGCATTTT	1	Liver	9351	FALSE	TRUE	FALSE
ACCAGTATCACCGGGT-1-P190604_Liver_1	clone_P190604:10797:1	P190604	P190604_TRAV8-1_TGTGCCGTTACTGACAGCTGGGGGAAATTCCAGTTT_TRAJ24:P190604_TRBV28_TGTGCCAGCAGTTCTGTGGTAGCGGGGCCCTCCTACAATGAGCAGTTCTTC_TRBJ2-1	TRAC	TRAV8-1	TRAJ24	TGTGCCGTTACTGACAGCTGGGGGAAATTCCAGTTT	TRAC	TRBV28	TRBJ2-1	TGTGCCAGCAGTTCTGTGGTAGCGGGGCCCTCCTACAATGAGCAGTTCTTC	1	Liver	10797	FALSE	FALSE	FALSE
ACCAGTATCGGAGCAA-1-P190604_Liver_1	clone_P190604:10120:1	P190604	P190604_TRAV21_TGTGCTGTCATCGGGGGTGCAGGCAACATGCTCACCTTT_TRAJ39:P190604_TRBV7-8_TGTGCCAGCAGCTTATGGTCCTCTGGGGCCAACGTCCTGACTTTC_TRBJ2-6	TRAC	TRAV21	TRAJ39	TGTGCTGTCATCGGGGGTGCAGGCAACATGCTCACCTTT	TRAC	TRBV7-8	TRBJ2-6	TGTGCCAGCAGCTTATGGTCCTCTGGGGCCAACGTCCTGACTTTC	1	Liver	10120	FALSE	FALSE	FALSE
ACCCACTAGGCTAGCA-1-P190604_Liver_1	clone_P190604:9619:1	P190604	P190604_TRAV12-2_TGTGCCGTGAATCCGGGGAGAGGAACCTACAAATACATCTTT_TRAJ40:P190604_TRBV29-1_TGCAGCGTGAAACTAGCGGGAGGGCCCCGGAACACCGGGGAGCTGTTTTTT_TRBJ2-2	TRAC	TRAV12-2	TRAJ40	TGTGCCGTGAATCCGGGGAGAGGAACCTACAAATACATCTTT	TRAC	TRBV29-1	TRBJ2-2	TGCAGCGTGAAACTAGCGGGAGGGCCCCGGAACACCGGGGAGCTGTTTTTT	1	Liver	9619	FALSE	FALSE	FALSE
ACCCACTGTTGTCGCG-1-P190604_Liver_1	clone_P190604:9760:1	P190604	P190604_TRAV13-1_TGTGCCCCCAACCGAGGTTCTGCAAGGCAACTGACCTTT_TRAJ22:P190604_TRBV5-1_TGCGCCAGCAGCCGGACAGGTGAGCCGCCCCAGCATTTT_TRBJ1-5	TRAC	TRAV13-1	TRAJ22	TGTGCCCCCAACCGAGGTTCTGCAAGGCAACTGACCTTT	TRAC	TRBV5-1	TRBJ1-5	TGCGCCAGCAGCCGGACAGGTGAGCCGCCCCAGCATTTT	1	Liver	9760	FALSE	FALSE	FALSE
ACCCACTTCACCAGGC-1-P190604_Liver_1	clone_P190604:9775:4	P190604	P190604_TRAV13-2_TGTGCAGAGAATATAAGCACACCTCTTGTCTTT_TRAJ29:P190604_TRBV3-1_TGTGCCAGCAGCCAATCGACAGGGGGATTCTATTCACCCCTCCACTTT_TRBJ1-6	TRAC	TRAV13-2	TRAJ29	TGTGCAGAGAATATAAGCACACCTCTTGTCTTT	TRAC	TRBV3-1	TRBJ1-6	TGTGCCAGCAGCCAATCGACAGGGGGATTCTATTCACCCCTCCACTTT	4	Liver	9775	TRUE	FALSE	FALSE
ACCCACTTCTCACATT-1-P190604_Liver_1	clone_P190604:9438:3	P190604	P190604_TRAV1-2_TGTGCTGTGATGGATAGCAACTATCAGTTAATCTGG_TRAJ33:P190604_TRBV6-2_TGTGCCAGCAGTTACCAGCGGGAGGGCAATGAGCAGTTCTTC_TRBJ2-1	TRAC	TRAV1-2	TRAJ33	TGTGCTGTGATGGATAGCAACTATCAGTTAATCTGG	TRAC	TRBV6-2	TRBJ2-1	TGTGCCAGCAGTTACCAGCGGGAGGGCAATGAGCAGTTCTTC	3	Liver	9438	TRUE	TRUE	FALSE
ACCCACTTCTGATACG-1-P190604_Liver_1	clone_P190604:9478:2	P190604	P190604_TRAV1-2_TGTGCTTCCATGGATAGCAACTATCAGTTAATCTGG_TRAJ33:P190604_TRBV6-4_TGTGCCAGCAGTGACTCGACTAGCGGCACAGATACGCAGTATTTT_TRBJ2-3	TRAC	TRAV1-2	TRAJ33	TGTGCTTCCATGGATAGCAACTATCAGTTAATCTGG	TRAC	TRBV6-4	TRBJ2-3	TGTGCCAGCAGTGACTCGACTAGCGGCACAGATACGCAGTATTTT	2	Liver	9478	TRUE	TRUE	FALSE
ACCGTAAAGTGTCTCA-1-P190604_Liver_1	clone_P190604:9487:1	P190604	P190604_TRAV10_TGTGTGGTGAATATCAGAGATGACAAGATCATCTTT_TRAJ30:P190604_TRBV5-4_TGTGCCAGCAGCTCAACCGATACAGGGACCTATGGCTACACCTTC_TRBJ1-2	TRAC	TRAV10	TRAJ30	TGTGTGGTGAATATCAGAGATGACAAGATCATCTTT	TRAC	TRBV5-4	TRBJ1-2	TGTGCCAGCAGCTCAACCGATACAGGGACCTATGGCTACACCTTC	1	Liver	9487	FALSE	FALSE	FALSE
ACCGTAAGTCCTCCAT-1-P190604_Liver_1	clone_P190604:10222:26	P190604	P190604_TRAV23/DV6_TGTGCAGCAAGGGACACCGACAAGCTCATCTTT_TRAJ34:P190604_TRBV7-3_TGTGCCAGCAGCTTAAGACAGGGCGTGGAGGATACGCAGTATTTT_TRBJ2-3	TRAC	TRAV23/DV6	TRAJ34	TGTGCAGCAAGGGACACCGACAAGCTCATCTTT	TRAC	TRBV7-3	TRBJ2-3	TGTGCCAGCAGCTTAAGACAGGGCGTGGAGGATACGCAGTATTTT	26	Liver	10222	TRUE	FALSE	FALSE
ACCGTAATCAGTTGAC-1-P190604_Liver_1	clone_P190604:9620:4	P190604	P190604_TRAV12-2_TGTGCCGTGAATCGGAACTTTGGAAATGAGAAATTAACCTTT_TRAJ48:P190604_TRBV2_TGTGCCAGCATAAGATTCGTTTACGAGCAGTACTTC_TRBJ2-7	TRAC	TRAV12-2	TRAJ48	TGTGCCGTGAATCGGAACTTTGGAAATGAGAAATTAACCTTT	TRAC	TRBV2	TRBJ2-7	TGTGCCAGCATAAGATTCGTTTACGAGCAGTACTTC	4	Liver	9620	TRUE	FALSE	FALSE
ACCTTTACAGTTCCCT-1-P190604_Liver_1	clone_P190604:9694:1	P190604	P190604_TRAV13-1_TGTGCAGCAAACGAAGCCGGGTATGCACTCAACTTC_TRAJ41:P190604_TRBV24-1_TGTGCCACCAGTGATTTGGGGACTAGCGGCCGGGGGAATGAGCAGTTCTTC_TRBJ2-1	TRAC	TRAV13-1	TRAJ41	TGTGCAGCAAACGAAGCCGGGTATGCACTCAACTTC	TRAC	TRBV24-1	TRBJ2-1	TGTGCCACCAGTGATTTGGGGACTAGCGGCCGGGGGAATGAGCAGTTCTTC	1	Liver	9694	FALSE	FALSE	FALSE
ACCTTTAGTCGTGGCT-1-P190604_Liver_1	clone_P190604:10396:5	P190604	P190604_TRAV27_TGTGCAGGTTCTTTATCTAACGACTACAAGCTCAGCTTT_TRAJ20:P190604_TRBV9_TGTGCCAGCAGCTCCTCCAGCGGGAGGAGCAATGAGCAGTTCTTC_TRBJ2-1	TRAC	TRAV27	TRAJ20	TGTGCAGGTTCTTTATCTAACGACTACAAGCTCAGCTTT	TRAC	TRBV9	TRBJ2-1	TGTGCCAGCAGCTCCTCCAGCGGGAGGAGCAATGAGCAGTTCTTC	5	Liver	10396	TRUE	FALSE	FALSE
ACCTTTAGTGAGGGTT-1-P190604_Liver_1	clone_P190604:9357:2	P190604	P190604_TRAV1-2_TGTGCTGTGAAGGATAGCAACTATCAGTTAATCTGG_TRAJ33:P190604_TRBV12-5_TGTGCTAGTGGGGGGGGACAGGCGAGCTCCTACGAGCAGTACTTC_TRBJ2-7	TRAC	TRAV1-2	TRAJ33	TGTGCTGTGAAGGATAGCAACTATCAGTTAATCTGG	TRAC	TRBV12-5	TRBJ2-7	TGTGCTAGTGGGGGGGGACAGGCGAGCTCCTACGAGCAGTACTTC	2	Liver	9357	TRUE	TRUE	FALSE
ACCTTTATCCGTAGTA-1-P190604_Liver_1	clone_P190604:9430:2	P190604	P190604_TRAV1-2_TGTGCTGTGATGGATAGCAACTATCAGTTAATCTGG_TRAJ33:P190604_TRBV15_TGTGCCACCAGCAGAGATAGCGGCTCCTACAATGAGCAGTTCTTC_TRBJ2-1	TRAC	TRAV1-2	TRAJ33	TGTGCTGTGATGGATAGCAACTATCAGTTAATCTGG	TRAC	TRBV15	TRBJ2-1	TGTGCCACCAGCAGAGATAGCGGCTCCTACAATGAGCAGTTCTTC	2	Liver	9430	TRUE	TRUE	FALSE
ACGAGCCAGATAGTCA-1-P190604_Liver_1	clone_P190604:10585:3	P190604	P190604_TRAV35_TGTGCTGGGCAGTACTTTGGAAATGAGAAATTAACCTTT_TRAJ48:P190604_TRBV20-1_TGCAGTGCTAGACTAAGAACTGAAGCTTTCTTT_TRBJ1-1	TRAC	TRAV35	TRAJ48	TGTGCTGGGCAGTACTTTGGAAATGAGAAATTAACCTTT	TRAC	TRBV20-1	TRBJ1-1	TGCAGTGCTAGACTAAGAACTGAAGCTTTCTTT	3	Liver	10585	TRUE	FALSE	FALSE
ACGAGCCAGTTACGGG-1-P190604_Liver_1	clone_P190604:9984:1	P190604	P190604_TRAV19_TGTGCTCTGAGTGAGAGGGGTAACCAGGGAGGAAAGCTTATCTTC_TRAJ23:P190604_TRBV28_TGTGCCAGCAGCTCGTCAGGGGCTTTGACCTACGAGCAGTACTTC_TRBJ2-7	TRAC	TRAV19	TRAJ23	TGTGCTCTGAGTGAGAGGGGTAACCAGGGAGGAAAGCTTATCTTC	TRAC	TRBV28	TRBJ2-7	TGTGCCAGCAGCTCGTCAGGGGCTTTGACCTACGAGCAGTACTTC	1	Liver	9984	FALSE	FALSE	FALSE
ACGATACAGGTGTGGT-1-P190604_Liver_1	clone_P190604:9537:2	P190604	P190604_TRAV12-1_TGTGTGGTGAACGGGAATGGCAATGCAGGCAAATCAACCTTT_TRAJ27:P190604_TRBV6-1_TGTGCCAGCAGTGAAGGTTCTACCTACGAGCAGTACTTC_TRBJ2-7	TRAC	TRAV12-1	TRAJ27	TGTGTGGTGAACGGGAATGGCAATGCAGGCAAATCAACCTTT	TRAC	TRBV6-1	TRBJ2-7	TGTGCCAGCAGTGAAGGTTCTACCTACGAGCAGTACTTC	2	Liver	9537	TRUE	FALSE	FALSE
ACGATACGTCGTCTTC-1-P190604_Liver_1	clone_P190604:10205:1	P190604	P190604_TRAV23/DV6_TGTGCAGCAACCGATTCTGGGGGTTACCAGAAAGTTACCTTT_TRAJ13:P190604_TRBV5-1_TGCGCCAGCACTCTGGCGGGAGGACCAACCGGGGAGCTGTTTTTT_TRBJ2-2	TRAC	TRAV23/DV6	TRAJ13	TGTGCAGCAACCGATTCTGGGGGTTACCAGAAAGTTACCTTT	TRAC	TRBV5-1	TRBJ2-2	TGCGCCAGCACTCTGGCGGGAGGACCAACCGGGGAGCTGTTTTTT	1	Liver	10205	FALSE	FALSE	FALSE
ACGATACTCCTTTACA-1-P190604_Liver_1	clone_P190604:9672:1	P190604	P190604_TRAV12-3_TGTGCAATGAGCGCTCCAACCTCCTACGACAAGGTGATATTT_TRAJ50:P190604_TRBV29-1_TGCAGCGTTGAAGAGAGGGGGACTGGCATGGGGGCTTTCTTT_TRBJ1-1	TRAC	TRAV12-3	TRAJ50	TGTGCAATGAGCGCTCCAACCTCCTACGACAAGGTGATATTT	TRAC	TRBV29-1	TRBJ1-1	TGCAGCGTTGAAGAGAGGGGGACTGGCATGGGGGCTTTCTTT	1	Liver	9672	FALSE	FALSE	FALSE
ACGATACTCGGCATCG-1-P190604_Liver_1	clone_P190604:10683:3	P190604	P190604_TRAV4_TGCCTCGTGGGTGACGATACTGGAGGCTTCAAAACTATCTTT_TRAJ9:P190604_TRBV5-1_TGCGCCAGCAGCTTGGGGGACAGGGGAGGAACTTTCTTT_TRBJ1-1	TRAC	TRAV4	TRAJ9	TGCCTCGTGGGTGACGATACTGGAGGCTTCAAAACTATCTTT	TRAC	TRBV5-1	TRBJ1-1	TGCGCCAGCAGCTTGGGGGACAGGGGAGGAACTTTCTTT	3	Liver	10683	TRUE	FALSE	FALSE
ACGCAGCAGGTCGGAT-1-P190604_Liver_1	clone_P190604:10163:12	P190604	P190604_TRAV21_TGTGCTGTGGAGGATAGCAACTATCAGTTAATCTGG_TRAJ33:P190604_TRBV5-1_TGCGCCAGCCGAGATACCATCGGGACAGACGACTATGGCTACACCTTC_TRBJ1-2	TRAC	TRAV21	TRAJ33	TGTGCTGTGGAGGATAGCAACTATCAGTTAATCTGG	TRAC	TRBV5-1	TRBJ1-2	TGCGCCAGCCGAGATACCATCGGGACAGACGACTATGGCTACACCTTC	12	Liver	10163	TRUE	FALSE	FALSE
ACGCCAGGTCGAAAGC-1-P190604_Liver_1	clone_P190604:10775:6	P190604	P190604_TRAV8-1_TGTGCCGTGAACCATTCTGGGGGTTACCAGAAAGTTACCTTT_TRAJ13:P190604_TRBV7-2_TGTGCCAGCAGCTCCGAAGCCAATCAGCCCCAGCATTTT_TRBJ1-5	TRAC	TRAV8-1	TRAJ13	TGTGCCGTGAACCATTCTGGGGGTTACCAGAAAGTTACCTTT	TRAC	TRBV7-2	TRBJ1-5	TGTGCCAGCAGCTCCGAAGCCAATCAGCCCCAGCATTTT	6	Liver	10775	TRUE	FALSE	FALSE
ACGCCAGTCGCGCCAA-1-P190604_Liver_1	clone_P190604:10935:4	P190604	P190604_TRAV8-4_TGTGCTGTGGGGCTCACGGGAGGAGGAAACAAACTCACCTTT_TRAJ10:P190604_TRBV27_TGTGCCAGCAGTTCAGCTGGAGGGAGCGAATATGGCTACACCTTC_TRBJ1-2	TRAC	TRAV8-4	TRAJ10	TGTGCTGTGGGGCTCACGGGAGGAGGAAACAAACTCACCTTT	TRAC	TRBV27	TRBJ1-2	TGTGCCAGCAGTTCAGCTGGAGGGAGCGAATATGGCTACACCTTC	4	Liver	10935	TRUE	FALSE	FALSE
ACGCCGAAGCTTTGGT-1-P190604_Liver_1	clone_P190604:10283:1	P190604	P190604_TRAV25_TGTGCCTCAGGGGGAACCTACAAATACATCTTT_TRAJ40:P190604_TRBV18_TGTGCCAGCTCCCCTACTAGCGGGAGTGTTCTTGAGCAGTACTTC_TRBJ2-7	TRAC	TRAV25	TRAJ40	TGTGCCTCAGGGGGAACCTACAAATACATCTTT	TRAC	TRBV18	TRBJ2-7	TGTGCCAGCTCCCCTACTAGCGGGAGTGTTCTTGAGCAGTACTTC	1	Liver	10283	FALSE	FALSE	FALSE
ACGGAGAAGAATTGTG-1-P190604_Liver_1	clone_P190604:10901:8	P190604	P190604_TRAV8-4_TGTGCTGTGAGTCCTGCTAACCAGGGAGGAAAGCTTATCTTC_TRAJ23:P190604_TRBV20-1_TGCAGTGCTCGGACTAGCGGTACCTACTACGAGCAGTACTTC_TRBJ2-7	TRAC	TRAV8-4	TRAJ23	TGTGCTGTGAGTCCTGCTAACCAGGGAGGAAAGCTTATCTTC	TRAC	TRBV20-1	TRBJ2-7	TGCAGTGCTCGGACTAGCGGTACCTACTACGAGCAGTACTTC	8	Liver	10901	TRUE	FALSE	FALSE
ACGGCCAAGATATGGT-1-P190604_Liver_1	clone_P190604:10647:1	P190604	P190604_TRAV38-2/DV8_TGTGCTTATGAAGAGGAGGGCGGATCTGAAAAGCTGGTCTTT_TRAJ57:P190604_TRBV12-3_TGTGCCAGCACCCTACTAGCGGGAGCCTACGAGCAGTACTTC_TRBJ2-7	TRAC	TRAV38-2/DV8	TRAJ57	TGTGCTTATGAAGAGGAGGGCGGATCTGAAAAGCTGGTCTTT	TRAC	TRBV12-3	TRBJ2-7	TGTGCCAGCACCCTACTAGCGGGAGCCTACGAGCAGTACTTC	1	Liver	10647	FALSE	FALSE	FALSE
ACGGCCAAGGCATGTG-1-P190604_Liver_1	clone_P190604:10987:7	P190604	P190604_TRAV9-2_TGTGCTCTGAGAGGGTCTGGTGGCTACAATAAGCTGATTTTT_TRAJ4:P190604_TRBV20-1_TGCAGTGCCGAACTCGGGACGGCCTACGAGCAGTACTTC_TRBJ2-7	TRAC	TRAV9-2	TRAJ4	TGTGCTCTGAGAGGGTCTGGTGGCTACAATAAGCTGATTTTT	TRAC	TRBV20-1	TRBJ2-7	TGCAGTGCCGAACTCGGGACGGCCTACGAGCAGTACTTC	7	Liver	10987	TRUE	FALSE	FALSE
ACGGCCACAGCTGCAC-1-P190604_Liver_1	clone_P190604:10042:1	P190604	P190604_TRAV2_TGTGCTGTGGAGGACCCCTACAACTTCAACAAATTTTACTTT_TRAJ21:P190604_TRBV20-1_TGCAGTGCTAGTAGGGGACTAGCGGGGTACAATGAGCAGTTCTTC_TRBJ2-1	TRAC	TRAV2	TRAJ21	TGTGCTGTGGAGGACCCCTACAACTTCAACAAATTTTACTTT	TRAC	TRBV20-1	TRBJ2-1	TGCAGTGCTAGTAGGGGACTAGCGGGGTACAATGAGCAGTTCTTC	1	Liver	10042	FALSE	FALSE	FALSE
ACGGCCATCCGTCATC-1-P190604_Liver_1	clone_P190604:9441:4	P190604	P190604_TRAV1-2_TGTGCTGTGATGGATAGCAACTATCAGTTAATCTGG_TRAJ33:P190604_TRBV6-4_TGTGCCAGCAGTGACGGGACTAGCGGGAGCACAGATACGCAGTATTTT_TRBJ2-3	TRAC	TRAV1-2	TRAJ33	TGTGCTGTGATGGATAGCAACTATCAGTTAATCTGG	TRAC	TRBV6-4	TRBJ2-3	TGTGCCAGCAGTGACGGGACTAGCGGGAGCACAGATACGCAGTATTTT	4	Liver	9441	TRUE	TRUE	FALSE
ACGGGCTCAGCTATTG-1-P190604_Liver_1	clone_P190604:10773:1	P190604	P190604_TRAV8-1_TGTGCCGCGAACTCAAATTCCGGGTATGCACTCAACTTC_TRAJ41:P190604_TRBV30_TGTGCCGCGAAAACCGGGACAGGGGGCTTGGTGGATACGCAGTATTTT_TRBJ2-3	TRAC	TRAV8-1	TRAJ41	TGTGCCGCGAACTCAAATTCCGGGTATGCACTCAACTTC	TRAC	TRBV30	TRBJ2-3	TGTGCCGCGAAAACCGGGACAGGGGGCTTGGTGGATACGCAGTATTTT	1	Liver	10773	FALSE	FALSE	FALSE
ACGGGCTGTAGCGTAG-1-P190604_Liver_1	clone_P190604:10707:2	P190604	P190604_TRAV41_TGTGCTGTCAGATCGATAGAAACCAGTGGCTCTAGGTTGACCTTT_TRAJ58:P190604_TRBV5-1_TGCGCCAGCAGCGGCACCGGGACAGGGGCCGAGCAGTACTTC_TRBJ2-7	TRAC	TRAV41	TRAJ58	TGTGCTGTCAGATCGATAGAAACCAGTGGCTCTAGGTTGACCTTT	TRAC	TRBV5-1	TRBJ2-7	TGCGCCAGCAGCGGCACCGGGACAGGGGCCGAGCAGTACTTC	2	Liver	10707	TRUE	FALSE	FALSE
ACGGGCTGTCGCATAT-1-P190604_Liver_1	clone_P190604:10986:2	P190604	P190604_TRAV9-2_TGTGCTCTGAGAGGAGCTGGAGGCTTCAAAACTATCTTT_TRAJ9:P190604_TRBV5-1_TGCGCCAGCAGCCGTGGACAGGGGATGGAGAACACTGAAGCTTTCTTT_TRBJ1-1	TRAC	TRAV9-2	TRAJ9	TGTGCTCTGAGAGGAGCTGGAGGCTTCAAAACTATCTTT	TRAC	TRBV5-1	TRBJ1-1	TGCGCCAGCAGCCGTGGACAGGGGATGGAGAACACTGAAGCTTTCTTT	2	Liver	10986	TRUE	FALSE	FALSE
ACGGGCTGTTAGATGA-1-P190604_Liver_1	clone_P190604:10722:2	P190604	P190604_TRAV41_TGTGCTGTGCTAGGAGGAGGTGCTGACGGACTCACCTTT_TRAJ45:P190604_TRBV2_TGTGCCAGAATTATAAGCGGACTAGCGGGGGGTTATGAGCAGTTCTTC_TRBJ2-1	TRAC	TRAV41	TRAJ45	TGTGCTGTGCTAGGAGGAGGTGCTGACGGACTCACCTTT	TRAC	TRBV2	TRBJ2-1	TGTGCCAGAATTATAAGCGGACTAGCGGGGGGTTATGAGCAGTTCTTC	2	Liver	10722	TRUE	FALSE	FALSE
ACGGGCTTCGTCTGCT-1-P190604_Liver_1	clone_P190604:10092:1	P190604	P190604_TRAV20_TGTGCTGTGCAGGTCTACTTTGGAAATGAGAAATTAACCTTT_TRAJ48:P190604_TRBV5-4_TGTGCCAGCAGCTTAACGCGCAGGGCAGATGAGCAGTTCTTC_TRBJ2-1	TRAC	TRAV20	TRAJ48	TGTGCTGTGCAGGTCTACTTTGGAAATGAGAAATTAACCTTT	TRAC	TRBV5-4	TRBJ2-1	TGTGCCAGCAGCTTAACGCGCAGGGCAGATGAGCAGTTCTTC	1	Liver	10092	FALSE	FALSE	FALSE
ACGTCAAAGAGCTGGT-1-P190604_Liver_1	clone_P190604:9814:2	P190604	P190604_TRAV14/DV4_TGTGCAATGAAGTCACCAAGGGGAGGAGGAAACAAACTCACCTTT_TRAJ10:P190604_TRBV20-1_TGCAGTGCTCGAGATCCAGTAGGTTTCCTGGATACGCAGTATTTT_TRBJ2-3	TRAC	TRAV14/DV4	TRAJ10	TGTGCAATGAAGTCACCAAGGGGAGGAGGAAACAAACTCACCTTT	TRAC	TRBV20-1	TRBJ2-3	TGCAGTGCTCGAGATCCAGTAGGTTTCCTGGATACGCAGTATTTT	2	Liver	9814	TRUE	FALSE	FALSE
ACGTCAAAGTGTTTGC-1-P190604_Liver_1	clone_P190604:9870:1	P190604	P190604_TRAV16_TGTGCTCTAAAAGGGTTCCTTGGCTCAGGAACCTACAAATACATCTTT_TRAJ40:P190604_TRBV7-8_TGTGCCAGCAGCTTCAGGGGGGGTGTCTACGAGCAGTACTTC_TRBJ2-7	TRAC	TRAV16	TRAJ40	TGTGCTCTAAAAGGGTTCCTTGGCTCAGGAACCTACAAATACATCTTT	TRAC	TRBV7-8	TRBJ2-7	TGTGCCAGCAGCTTCAGGGGGGGTGTCTACGAGCAGTACTTC	1	Liver	9870	FALSE	FALSE	FALSE
ACGTCAACACCATGTA-1-P190604_Liver_1	clone_P190604:10186:1	P190604	P190604_TRAV22_TGTGCTGGGAAGGATTATGGAGGAAGCCAAGGAAATCTCATCTTT_TRAJ42:P190604_TRBV30_TGTGCCTGGGCTGGGACAGATAATTCACCCCTCCACTTT_TRBJ1-6	TRAC	TRAV22	TRAJ42	TGTGCTGGGAAGGATTATGGAGGAAGCCAAGGAAATCTCATCTTT	TRAC	TRBV30	TRBJ1-6	TGTGCCTGGGCTGGGACAGATAATTCACCCCTCCACTTT	1	Liver	10186	FALSE	FALSE	FALSE
ACGTCAATCGAATCCA-1-P190604_Liver_1	clone_P190604:9297:1	P190604	P190604_TRAV1-1_TGCGCTGTGAACAGAGATGACAAGATCATCTTT_TRAJ30:P190604_TRBV27_TGTGCCAGCAGTTCGACTAGTAGCTACGAGCAGTACTTC_TRBJ2-7	TRAC	TRAV1-1	TRAJ30	TGCGCTGTGAACAGAGATGACAAGATCATCTTT	TRAC	TRBV27	TRBJ2-7	TGTGCCAGCAGTTCGACTAGTAGCTACGAGCAGTACTTC	1	Liver	9297	FALSE	FALSE	FALSE
ACTATCTCAGAGCCAA-1-P190604_Liver_1	clone_P190604:9379:1	P190604	P190604_TRAV1-2_TGTGCTGTGAGAGATAGCAACTATCAGTTAATCTGG_TRAJ33:P190604_TRBV6-2_TGTGCCAGCAGTTACGACAGCTCCTACAATGAGCAGTTCTTC_TRBJ2-1	TRAC	TRAV1-2	TRAJ33	TGTGCTGTGAGAGATAGCAACTATCAGTTAATCTGG	TRAC	TRBV6-2	TRBJ2-1	TGTGCCAGCAGTTACGACAGCTCCTACAATGAGCAGTTCTTC	1	Liver	9379	FALSE	TRUE	FALSE
ACTATCTCAGGCTCAC-1-P190604_Liver_1	clone_P190604:10447:1	P190604	P190604_TRAV29/DV5_TGTGCAGCAAGCGGGTACAATAACAATGACATGCGCTTT_TRAJ43:P190604_TRBV20-1_TGCAGTGCTAGTGACAAGGGGGGCTCCTATAATTCACCCCTCCACTTT_TRBJ1-6	TRAC	TRAV29/DV5	TRAJ43	TGTGCAGCAAGCGGGTACAATAACAATGACATGCGCTTT	TRAC	TRBV20-1	TRBJ1-6	TGCAGTGCTAGTGACAAGGGGGGCTCCTATAATTCACCCCTCCACTTT	1	Liver	10447	FALSE	FALSE	FALSE
ACTGAACGTTCCCGAG-1-P190604_Liver_1	clone_P190604:10033:5	P190604	P190604_TRAV2_TGTGCTGTCCCTTACCAGGGAGGAAAGCTTATCTTC_TRAJ23:P190604_TRBV20-1_TGCAGTGCTGGGGGACTAGCGGGAGGGCGGGAAGATACGCAGTATTTT_TRBJ2-3	TRAC	TRAV2	TRAJ23	TGTGCTGTCCCTTACCAGGGAGGAAAGCTTATCTTC	TRAC	TRBV20-1	TRBJ2-3	TGCAGTGCTGGGGGACTAGCGGGAGGGCGGGAAGATACGCAGTATTTT	5	Liver	10033	TRUE	FALSE	FALSE
ACTGAACTCGTTTGCC-1-P190604_Liver_1	clone_P190604:10264:1	P190604	P190604_TRAV25_TGTGCAGACCGACATGGCTCTAGCAACACAGGCAAACTAATCTTT_TRAJ37:P190604_TRBV6-6_TGTGCCAGCAGCGTACAAAGGGGCAGGACGAACACTGAAGCTTTCTTT_TRBJ1-1	TRAC	TRAV25	TRAJ37	TGTGCAGACCGACATGGCTCTAGCAACACAGGCAAACTAATCTTT	TRAC	TRBV6-6	TRBJ1-1	TGTGCCAGCAGCGTACAAAGGGGCAGGACGAACACTGAAGCTTTCTTT	1	Liver	10264	FALSE	FALSE	FALSE
ACTGAGTAGGATGTAT-1-P190604_Liver_1	clone_P190604:9317:2	P190604	P190604_TRAV1-1_TGCGCTGTTTCTAACGACTACAAGCTCAGCTTT_TRAJ20:P190604_TRBV28_TGTGCCAGCAGCCCTGAAAACTCCTACGAGCAGTACTTC_TRBJ2-7	TRAC	TRAV1-1	TRAJ20	TGCGCTGTTTCTAACGACTACAAGCTCAGCTTT	TRAC	TRBV28	TRBJ2-7	TGTGCCAGCAGCCCTGAAAACTCCTACGAGCAGTACTTC	2	Liver	9317	TRUE	FALSE	FALSE
ACTGAGTCAGTCACTA-1-P190604_Liver_1	clone_P190604:10586:6	P190604	P190604_TRAV35_TGTGCTGGGCAGTATTATTCAGGAAACACACCTCTTGTCTTT_TRAJ29:P190604_TRBV6-5_TGTGCCAGCAGTCCAGGGACTTACACGGACACCGGGGAGCTGTTTTTT_TRBJ2-2	TRAC	TRAV35	TRAJ29	TGTGCTGGGCAGTATTATTCAGGAAACACACCTCTTGTCTTT	TRAC	TRBV6-5	TRBJ2-2	TGTGCCAGCAGTCCAGGGACTTACACGGACACCGGGGAGCTGTTTTTT	6	Liver	10586	TRUE	FALSE	FALSE
ACTGAGTTCACGACTA-1-P190604_Liver_1	clone_P190604:10613:1	P190604	P190604_TRAV38-1_TGTGCTTTCATGAAGCGTCGGAACCAGGGAGGAAAGCTTATCTTC_TRAJ23:P190604_TRBV27_TGTGCCAGCACCGTAGGGGGTCTAGCGGGAGGGCTCCGAGAGCAGTTCTTC_TRBJ2-1	TRAC	TRAV38-1	TRAJ23	TGTGCTTTCATGAAGCGTCGGAACCAGGGAGGAAAGCTTATCTTC	TRAC	TRBV27	TRBJ2-1	TGTGCCAGCACCGTAGGGGGTCTAGCGGGAGGGCTCCGAGAGCAGTTCTTC	1	Liver	10613	FALSE	FALSE	FALSE
ACTGATGAGTGGAGAA-1-P190604_Liver_1	clone_P190604:9669:1	P190604	P190604_TRAV12-3_TGTGCAATGAGCGCGATGAACAGAGATGACAAGATCATCTTT_TRAJ30:P190604_TRBV19_TGTGCCAGTAGAGTACTGGACAGTGATCAGCCCCAGCATTTT_TRBJ1-5	TRAC	TRAV12-3	TRAJ30	TGTGCAATGAGCGCGATGAACAGAGATGACAAGATCATCTTT	TRAC	TRBV19	TRBJ1-5	TGTGCCAGTAGAGTACTGGACAGTGATCAGCCCCAGCATTTT	1	Liver	9669	FALSE	FALSE	FALSE
ACTGATGCACCACGTG-1-P190604_Liver_1	clone_P190604:10221:3	P190604	P190604_TRAV23/DV6_TGTGCAGCAAGGGACACCGACAAGCTCATCTTT_TRAJ34:P190604_TRBV7-3_TGTGCCAGCAGCCCCCGACAGGGGGTGTACAATGAGCAGTTCTTC_TRBJ2-1	TRAC	TRAV23/DV6	TRAJ34	TGTGCAGCAAGGGACACCGACAAGCTCATCTTT	TRAC	TRBV7-3	TRBJ2-1	TGTGCCAGCAGCCCCCGACAGGGGGTGTACAATGAGCAGTTCTTC	3	Liver	10221	TRUE	FALSE	FALSE
ACTGATGTCAGTGCAT-1-P190604_Liver_1	clone_P190604:10011:1	P190604	P190604_TRAV19_TGTGCTCTGAGTGAGGGTACCAATAGTAAGCTGACATTT_TRAJ56:P190604_TRBV7-3_TGTGCCAGCAGCGCAACGGGACTAGCGGGAGGGGTAGAGCAGTTCTTC_TRBJ2-1	TRAC	TRAV19	TRAJ56	TGTGCTCTGAGTGAGGGTACCAATAGTAAGCTGACATTT	TRAC	TRBV7-3	TRBJ2-1	TGTGCCAGCAGCGCAACGGGACTAGCGGGAGGGGTAGAGCAGTTCTTC	1	Liver	10011	FALSE	FALSE	FALSE
ACTGATGTCGGCGCTA-1-P190604_Liver_1	clone_P190604:10851:1	P190604	P190604_TRAV8-3_TGTGCTGTGGGTGAGGACACCGACAAGCTCATCTTT_TRAJ34:P190604_TRBV5-1_TGCGCCAGCAGCTTGGATCGGACTAGCGGGAGGGCCTTAGCAAATGAGCAGTTCTTC_TRBJ2-1	TRAC	TRAV8-3	TRAJ34	TGTGCTGTGGGTGAGGACACCGACAAGCTCATCTTT	TRAC	TRBV5-1	TRBJ2-1	TGCGCCAGCAGCTTGGATCGGACTAGCGGGAGGGCCTTAGCAAATGAGCAGTTCTTC	1	Liver	10851	FALSE	FALSE	FALSE
ACTGTCCAGCGCTTAT-1-P190604_Liver_1	clone_P190604:10237:1	P190604	P190604_TRAV23/DV6_TGTGCAGCTTCGCAGAGTGCTTCCAAGATAATCTTT_TRAJ3:P190604_TRBV12-4_TGTGCCAGCAGGAGCCGGGAGTCGAGCTCCTACAATGAGCAGTTCTTC_TRBJ2-1	TRAC	TRAV23/DV6	TRAJ3	TGTGCAGCTTCGCAGAGTGCTTCCAAGATAATCTTT	TRAC	TRBV12-4	TRBJ2-1	TGTGCCAGCAGGAGCCGGGAGTCGAGCTCCTACAATGAGCAGTTCTTC	1	Liver	10237	FALSE	FALSE	FALSE
ACTGTCCGTCCAACTA-1-P190604_Liver_1	clone_P190604:9930:1	P190604	P190604_TRAV17_TGTGCTACGGAGGCGACAGGAGGAAGCTACATACCTACATTT_TRAJ6:P190604_TRBV27_TGTGCCAGCAGTTCGGACTTAAACAATGAGCAGTTCTTC_TRBJ2-1	TRAC	TRAV17	TRAJ6	TGTGCTACGGAGGCGACAGGAGGAAGCTACATACCTACATTT	TRAC	TRBV27	TRBJ2-1	TGTGCCAGCAGTTCGGACTTAAACAATGAGCAGTTCTTC	1	Liver	9930	FALSE	FALSE	FALSE
ACTGTCCGTCCAGTAT-1-P190604_Liver_1	clone_P190604:9471:2	P190604	P190604_TRAV1-2_TGTGCTGTGTTGAATAGCAACTATCAGTTAATCTGG_TRAJ33:P190604_TRBV6-1_TGTGCCAGCAGTGAATCGGACAGGATCGAGCAGTACTTC_TRBJ2-7	TRAC	TRAV1-2	TRAJ33	TGTGCTGTGTTGAATAGCAACTATCAGTTAATCTGG	TRAC	TRBV6-1	TRBJ2-7	TGTGCCAGCAGTGAATCGGACAGGATCGAGCAGTACTTC	2	Liver	9471	TRUE	TRUE	FALSE
ACTGTCCGTCTTCGTC-1-P190604_Liver_1	clone_P190604:10512:1	P190604	P190604_TRAV3_TGTGCTGTGAGAGACGAGAACACAGGCTTTCAGAAACTTGTATTT_TRAJ8:P190604_TRBV30_TGTGCCTGGAGTGTATATAACACTGAAGCTTTCTTT_TRBJ1-1	TRAC	TRAV3	TRAJ8	TGTGCTGTGAGAGACGAGAACACAGGCTTTCAGAAACTTGTATTT	TRAC	TRBV30	TRBJ1-1	TGTGCCTGGAGTGTATATAACACTGAAGCTTTCTTT	1	Liver	10512	FALSE	FALSE	FALSE
ACTGTCCGTTGGTTTG-1-P190604_Liver_1	clone_P190604:10421:60	P190604	P190604_TRAV29/DV5_TGTGCAGCAAGCGCCCATAGTGGAGGTAGCAACTATAAACTGACATTT_TRAJ53:P190604_TRBV7-9_TGTGCCACCAGATTAGGGTACGAGCAGTACTTC_TRBJ2-7	TRAC	TRAV29/DV5	TRAJ53	TGTGCAGCAAGCGCCCATAGTGGAGGTAGCAACTATAAACTGACATTT	TRAC	TRBV7-9	TRBJ2-7	TGTGCCACCAGATTAGGGTACGAGCAGTACTTC	60	Liver	10421	TRUE	FALSE	FALSE
ACTGTCCTCTTATCTG-1-P190604_Liver_1	clone_P190604:10450:1	P190604	P190604_TRAV29/DV5_TGTGCAGCAAGCGTTACCGGCACTGCCAGTAAACTCACCTTT_TRAJ44:P190604_TRBV20-1_TGCAGTGCTCACCTTAGCGGGAGAACAAGCACAGATACGCAGTATTTT_TRBJ2-3	TRAC	TRAV29/DV5	TRAJ44	TGTGCAGCAAGCGTTACCGGCACTGCCAGTAAACTCACCTTT	TRAC	TRBV20-1	TRBJ2-3	TGCAGTGCTCACCTTAGCGGGAGAACAAGCACAGATACGCAGTATTTT	1	Liver	10450	FALSE	FALSE	FALSE
ACTTACTAGAGCCTAG-1-P190604_Liver_1	clone_P190604:10342:1	P190604	P190604_TRAV26-2_TGCATCCTGAGAGACGAACGCACCTCAGGAACCTACAAATACATCTTT_TRAJ40:P190604_TRBV28_TGTGCCAGCACCTCCGGACAGATTCAGAACACTGAAGCTTTCTTT_TRBJ1-1	TRAC	TRAV26-2	TRAJ40	TGCATCCTGAGAGACGAACGCACCTCAGGAACCTACAAATACATCTTT	TRAC	TRBV28	TRBJ1-1	TGTGCCAGCACCTCCGGACAGATTCAGAACACTGAAGCTTTCTTT	1	Liver	10342	FALSE	FALSE	FALSE
ACTTACTAGATACACA-1-P190604_Liver_1	clone_P190604:10655:1	P190604	P190604_TRAV39_TGTGCCGCTCTTACCTCAGGAACCTACAAATACATCTTT_TRAJ40:P190604_TRBV2_TGTGCCTCATCTGCCGGCGGGGATACGCAGTATTTT_TRBJ2-3	TRAC	TRAV39	TRAJ40	TGTGCCGCTCTTACCTCAGGAACCTACAAATACATCTTT	TRAC	TRBV2	TRBJ2-3	TGTGCCTCATCTGCCGGCGGGGATACGCAGTATTTT	1	Liver	10655	FALSE	FALSE	FALSE
ACTTACTCAATGTAAG-1-P190604_Liver_1	clone_P190604:10220:3	P190604	P190604_TRAV23/DV6_TGTGCAGCAAGCTCGAGAGATGACAAGATCATCTTT_TRAJ30:P190604_TRBV5-4_TGTGCCAGCAGCTTTAACAGGGGATCTTTAGCGGAACGCCCCTACGAGCAGTACTTC_TRBJ2-7	TRAC	TRAV23/DV6	TRAJ30	TGTGCAGCAAGCTCGAGAGATGACAAGATCATCTTT	TRAC	TRBV5-4	TRBJ2-7	TGTGCCAGCAGCTTTAACAGGGGATCTTTAGCGGAACGCCCCTACGAGCAGTACTTC	3	Liver	10220	TRUE	FALSE	FALSE
ACTTGTTTCCTTGGTC-1-P190604_Liver_1	clone_P190604:9690:2	P190604	P190604_TRAV12-3_TGTGCATCGAAAACCTCCTACGACAAGGTGATATTT_TRAJ50:P190604_TRBV25-1_TGTGCCAGCAGTGAAGGGGACCCTCAGTATTTT_TRBJ2-3	TRAC	TRAV12-3	TRAJ50	TGTGCATCGAAAACCTCCTACGACAAGGTGATATTT	TRAC	TRBV25-1	TRBJ2-3	TGTGCCAGCAGTGAAGGGGACCCTCAGTATTTT	2	Liver	9690	TRUE	FALSE	FALSE
AGAATAGAGGAGTACC-1-P190604_Liver_1	clone_P190604:9359:2	P190604	P190604_TRAV1-2_TGTGCTGTGAAGGATAGCAACTATCAGTTAATCTGG_TRAJ33:P190604_TRBV30_TGTGCCTGGAACCCACTAGCGGGAGACTCCTACGAGCAGTACTTC_TRBJ2-7	TRAC	TRAV1-2	TRAJ33	TGTGCTGTGAAGGATAGCAACTATCAGTTAATCTGG	TRAC	TRBV30	TRBJ2-7	TGTGCCTGGAACCCACTAGCGGGAGACTCCTACGAGCAGTACTTC	2	Liver	9359	TRUE	TRUE	FALSE
AGAATAGGTGCCTGGT-1-P190604_Liver_1	clone_P190604:10220:3	P190604	P190604_TRAV23/DV6_TGTGCAGCAAGCTCGAGAGATGACAAGATCATCTTT_TRAJ30:P190604_TRBV5-4_TGTGCCAGCAGCTTTAACAGGGGATCTTTAGCGGAACGCCCCTACGAGCAGTACTTC_TRBJ2-7	TRAC	TRAV23/DV6	TRAJ30	TGTGCAGCAAGCTCGAGAGATGACAAGATCATCTTT	TRAC	TRBV5-4	TRBJ2-7	TGTGCCAGCAGCTTTAACAGGGGATCTTTAGCGGAACGCCCCTACGAGCAGTACTTC	3	Liver	10220	TRUE	FALSE	FALSE
AGACGTTAGCTAGTGG-1-P190604_Liver_1	clone_P190604:10585:3	P190604	P190604_TRAV35_TGTGCTGGGCAGTACTTTGGAAATGAGAAATTAACCTTT_TRAJ48:P190604_TRBV20-1_TGCAGTGCTAGACTAAGAACTGAAGCTTTCTTT_TRBJ1-1	TRAC	TRAV35	TRAJ48	TGTGCTGGGCAGTACTTTGGAAATGAGAAATTAACCTTT	TRAC	TRBV20-1	TRBJ1-1	TGCAGTGCTAGACTAAGAACTGAAGCTTTCTTT	3	Liver	10585	TRUE	FALSE	FALSE
AGACGTTCACCTCGGA-1-P190604_Liver_1	clone_P190604:9609:1	P190604	P190604_TRAV12-2_TGTGCCGTGAACGGCCGTTACCAGAAAGTTACCTTT_TRAJ13:P190604_TRBV20-1_TGCAGTGCTAGCGGGAGTTCTATTTTATACGAGCAGTACTTC_TRBJ2-7	TRAC	TRAV12-2	TRAJ13	TGTGCCGTGAACGGCCGTTACCAGAAAGTTACCTTT	TRAC	TRBV20-1	TRBJ2-7	TGCAGTGCTAGCGGGAGTTCTATTTTATACGAGCAGTACTTC	1	Liver	9609	FALSE	FALSE	FALSE
AGACGTTGTGCGATAG-1-P190604_Liver_1	clone_P190604:10606:2	P190604	P190604_TRAV38-1_TGTGCTTTCATAGAGGGAAGCCAAGGAAATCTCATCTTT_TRAJ42:P190604_TRBV16_TGTGCCAGCAGCTCCCGCCGGGGCCCAACTAATGAAAAACTGTTTTTT_TRBJ1-4	TRAC	TRAV38-1	TRAJ42	TGTGCTTTCATAGAGGGAAGCCAAGGAAATCTCATCTTT	TRAC	TRBV16	TRBJ1-4	TGTGCCAGCAGCTCCCGCCGGGGCCCAACTAATGAAAAACTGTTTTTT	2	Liver	10606	TRUE	FALSE	FALSE
AGACGTTTCATTTGGG-1-P190604_Liver_1	clone_P190604:10902:1	P190604	P190604_TRAV8-4_TGTGCTGTGAGTCGAGGATATGGAGGAAGCCAAGGAAATCTCATCTTT_TRAJ42:P190604_TRBV7-8_TGTGCCAGCACCGATACGGACAGGGGATTTACAGATACGCAGTATTTT_TRBJ2-3	TRAC	TRAV8-4	TRAJ42	TGTGCTGTGAGTCGAGGATATGGAGGAAGCCAAGGAAATCTCATCTTT	TRAC	TRBV7-8	TRBJ2-3	TGTGCCAGCACCGATACGGACAGGGGATTTACAGATACGCAGTATTTT	1	Liver	10902	FALSE	FALSE	FALSE
AGAGCGACAACGATGG-1-P190604_Liver_1	clone_P190604:9489:1	P190604	P190604_TRAV10_TGTGTGGTGAGCAAAGCTGCAGGCAACAAGCTAACTTTT_TRAJ17:P190604_TRBV10-3_TGTGCCATCAGTGAGTCTTCCATAGATGAGCAGTTCTTC_TRBJ2-1	TRAC	TRAV10	TRAJ17	TGTGTGGTGAGCAAAGCTGCAGGCAACAAGCTAACTTTT	TRAC	TRBV10-3	TRBJ2-1	TGTGCCATCAGTGAGTCTTCCATAGATGAGCAGTTCTTC	1	Liver	9489	FALSE	FALSE	FALSE
AGAGCGAGTTAAGGGC-1-P190604_Liver_1	clone_P190604:9492:1	P190604	P190604_TRAV10_TGTGTGGTGAGCGACGACGGGTATGCACTCAACTTC_TRAJ41:P190604_TRBV6-6_TGTGCCAGCAGGTCGCTCGGGACCTACAATCAGCCCCAGCATTTT_TRBJ1-5	TRAC	TRAV10	TRAJ41	TGTGTGGTGAGCGACGACGGGTATGCACTCAACTTC	TRAC	TRBV6-6	TRBJ1-5	TGTGCCAGCAGGTCGCTCGGGACCTACAATCAGCCCCAGCATTTT	1	Liver	9492	FALSE	FALSE	FALSE
AGAGCGATCGAGCCCA-1-P190604_Liver_1	clone_P190604:9981:3	P190604	P190604_TRAV19_TGTGCTCTGAGTGACTCCAACGACTACAAGCTCAGCTTT_TRAJ20:P190604_TRBV19_TGTGCCAGTAGTATAGAGGGCTATGGCTACACCTTC_TRBJ1-2	TRAC	TRAV19	TRAJ20	TGTGCTCTGAGTGACTCCAACGACTACAAGCTCAGCTTT	TRAC	TRBV19	TRBJ1-2	TGTGCCAGTAGTATAGAGGGCTATGGCTACACCTTC	3	Liver	9981	TRUE	FALSE	FALSE
AGAGCTTAGATCACGG-1-P190604_Liver_1	clone_P190604:10260:1	P190604	P190604_TRAV24_TGTGCCTTTTTTGATGCAGGCAAATCAACCTTT_TRAJ27:P190604_TRBV24-1_TGTGCCACCAGTGATCGCACTAACTACGAGCAGTACTTC_TRBJ2-7	TRAC	TRAV24	TRAJ27	TGTGCCTTTTTTGATGCAGGCAAATCAACCTTT	TRAC	TRBV24-1	TRBJ2-7	TGTGCCACCAGTGATCGCACTAACTACGAGCAGTACTTC	1	Liver	10260	FALSE	FALSE	FALSE
AGAGCTTAGTGCGTGA-1-P190604_Liver_1	clone_P190604:10420:1	P190604	P190604_TRAV29/DV5_TGTGCAGCAAGCGCATATTCAGGAGGAGGTGCTGACGGACTCACCTTT_TRAJ45:P190604_TRBV19_TGTGCCAGTAGTATAGATCACGGACGGTACGAGCAGTACTTC_TRBJ2-7	TRAC	TRAV29/DV5	TRAJ45	TGTGCAGCAAGCGCATATTCAGGAGGAGGTGCTGACGGACTCACCTTT	TRAC	TRBV19	TRBJ2-7	TGTGCCAGTAGTATAGATCACGGACGGTACGAGCAGTACTTC	1	Liver	10420	FALSE	FALSE	FALSE
AGAGTGGAGCACAGGT-1-P190604_Liver_1	clone_P190604:11044:2	P190604	P190604_TRAV9-2_TGTGCTCTGTTTCGAACCTCCTACGACAAGGTGATATTT_TRAJ50:P190604_TRBV12-3_TGTGCCAGCAGATCGGCATCCTTGAACACCGGGGAGCTGTTTTTT_TRBJ2-2	TRAC	TRAV9-2	TRAJ50	TGTGCTCTGTTTCGAACCTCCTACGACAAGGTGATATTT	TRAC	TRBV12-3	TRBJ2-2	TGTGCCAGCAGATCGGCATCCTTGAACACCGGGGAGCTGTTTTTT	2	Liver	11044	TRUE	FALSE	FALSE
AGAGTGGGTTCGTTGA-1-P190604_Liver_1	clone_P190604:10053:1	P190604	P190604_TRAV2_TGTGCTGTGGAGGATCGGAGTGGAGGCTTCAAAACTATCTTT_TRAJ9:P190604_TRBV4-3_TGCGCCAGCAGCCAAGATATTGGGGAGGGGGATCGGAATGGCTACACCTTC_TRBJ1-2	TRAC	TRAV2	TRAJ9	TGTGCTGTGGAGGATCGGAGTGGAGGCTTCAAAACTATCTTT	TRAC	TRBV4-3	TRBJ1-2	TGCGCCAGCAGCCAAGATATTGGGGAGGGGGATCGGAATGGCTACACCTTC	1	Liver	10053	FALSE	FALSE	FALSE
AGAGTGGTCACCGTAA-1-P190604_Liver_1	clone_P190604:10874:2	P190604	P190604_TRAV8-3_TGTGCTGTGGTCGGGTTTTCAGATGGCCAGAAGCTGCTCTTT_TRAJ16:P190604_TRBV7-6_TGTGCCAGCAGCTTAGGACCCGGTCTGGGCGGGGAGCTGTTTTTT_TRBJ2-2	TRAC	TRAV8-3	TRAJ16	TGTGCTGTGGTCGGGTTTTCAGATGGCCAGAAGCTGCTCTTT	TRAC	TRBV7-6	TRBJ2-2	TGTGCCAGCAGCTTAGGACCCGGTCTGGGCGGGGAGCTGTTTTTT	2	Liver	10874	TRUE	FALSE	FALSE
AGAGTGGTCTCTGTCG-1-P190604_Liver_1	clone_P190604:10901:8	P190604	P190604_TRAV8-4_TGTGCTGTGAGTCCTGCTAACCAGGGAGGAAAGCTTATCTTC_TRAJ23:P190604_TRBV20-1_TGCAGTGCTCGGACTAGCGGTACCTACTACGAGCAGTACTTC_TRBJ2-7	TRAC	TRAV8-4	TRAJ23	TGTGCTGTGAGTCCTGCTAACCAGGGAGGAAAGCTTATCTTC	TRAC	TRBV20-1	TRBJ2-7	TGCAGTGCTCGGACTAGCGGTACCTACTACGAGCAGTACTTC	8	Liver	10901	TRUE	FALSE	FALSE
AGATCTGCAAAGCAAT-1-P190604_Liver_1	clone_P190604:10586:6	P190604	P190604_TRAV35_TGTGCTGGGCAGTATTATTCAGGAAACACACCTCTTGTCTTT_TRAJ29:P190604_TRBV6-5_TGTGCCAGCAGTCCAGGGACTTACACGGACACCGGGGAGCTGTTTTTT_TRBJ2-2	TRAC	TRAV35	TRAJ29	TGTGCTGGGCAGTATTATTCAGGAAACACACCTCTTGTCTTT	TRAC	TRBV6-5	TRBJ2-2	TGTGCCAGCAGTCCAGGGACTTACACGGACACCGGGGAGCTGTTTTTT	6	Liver	10586	TRUE	FALSE	FALSE
AGATTGCCAGGTGGAT-1-P190604_Liver_1	clone_P190604:10766:3	P190604	P190604_TRAV6_TGTGCTCTAGACGGCCAGAAGCTGCTCTTT_TRAJ16:P190604_TRBV6-4_TGTGCCAGCAGTGACTCCGGGAACAATGAGCAGTTCTTC_TRBJ2-1	TRAC	TRAV6	TRAJ16	TGTGCTCTAGACGGCCAGAAGCTGCTCTTT	TRAC	TRBV6-4	TRBJ2-1	TGTGCCAGCAGTGACTCCGGGAACAATGAGCAGTTCTTC	3	Liver	10766	TRUE	FALSE	FALSE
AGATTGCGTCATCGGC-1-P190604_Liver_1	clone_P190604:9504:13	P190604	P190604_TRAV12-1_TGTGTGGGCCATAATGCAGGCAACATGCTCACCTTT_TRAJ39:P190604_TRBV20-1_TGCAGTGCTAGCTTGCCAGGGGCTCCTAGCAATCAGCCCCAGCATTTT_TRBJ1-5	TRAC	TRAV12-1	TRAJ39	TGTGTGGGCCATAATGCAGGCAACATGCTCACCTTT	TRAC	TRBV20-1	TRBJ1-5	TGCAGTGCTAGCTTGCCAGGGGCTCCTAGCAATCAGCCCCAGCATTTT	13	Liver	9504	TRUE	FALSE	FALSE
AGATTGCTCCTCCTAG-1-P190604_Liver_1	clone_P190604:10376:1	P190604	P190604_TRAV27_TGTGCAGGAGCCTACACCGGTAACCAGTTCTATTTT_TRAJ49:P190604_TRBV6-6_TGTGCCAGCAGTATTTCGACGAACACCATATATTTT_TRBJ1-3	TRAC	TRAV27	TRAJ49	TGTGCAGGAGCCTACACCGGTAACCAGTTCTATTTT	TRAC	TRBV6-6	TRBJ1-3	TGTGCCAGCAGTATTTCGACGAACACCATATATTTT	1	Liver	10376	FALSE	FALSE	FALSE
AGATTGCTCGTACGGC-1-P190604_Liver_1	clone_P190604:9758:2	P190604	P190604_TRAV13-1_TGTGCAGCTTCATCAGGAGGAAGCTACATACCTACATTT_TRAJ6:P190604_TRBV12-4_TGTGCCAGCAGCCTCGGACAGGGTGAAAAACTGTTTTTT_TRBJ1-4	TRAC	TRAV13-1	TRAJ6	TGTGCAGCTTCATCAGGAGGAAGCTACATACCTACATTT	TRAC	TRBV12-4	TRBJ1-4	TGTGCCAGCAGCCTCGGACAGGGTGAAAAACTGTTTTTT	2	Liver	9758	TRUE	FALSE	FALSE
AGATTGCTCTTGCAAG-1-P190604_Liver_1	clone_P190604:11032:1	P190604	P190604_TRAV9-2_TGTGCTCTGATGCTGAATTATGGTGGTGCTACAAACAAGCTCATCTTT_TRAJ32:P190604_TRBV6-6_TGTGCCAGCAGTTACGGAGCAGGCCAGCGGGACGAGCAGTACTTC_TRBJ2-7	TRAC	TRAV9-2	TRAJ32	TGTGCTCTGATGCTGAATTATGGTGGTGCTACAAACAAGCTCATCTTT	TRAC	TRBV6-6	TRBJ2-7	TGTGCCAGCAGTTACGGAGCAGGCCAGCGGGACGAGCAGTACTTC	1	Liver	11032	FALSE	FALSE	FALSE
AGATTGCTCTTGCCGT-1-P190604_Liver_1	clone_P190604:10665:6	P190604	P190604_TRAV4_TGCCTCGTGCGGAGCTCTACCGGCACTGCCAGTAAACTCACCTTT_TRAJ44:P190604_TRBV7-3_TGTGCCAGCAGCTTAATAGCGGGAGGGATCACAGATACGCAGTATTTT_TRBJ2-3	TRAC	TRAV4	TRAJ44	TGCCTCGTGCGGAGCTCTACCGGCACTGCCAGTAAACTCACCTTT	TRAC	TRBV7-3	TRBJ2-3	TGTGCCAGCAGCTTAATAGCGGGAGGGATCACAGATACGCAGTATTTT	6	Liver	10665	TRUE	FALSE	FALSE
AGCAGCCAGGAATTAC-1-P190604_Liver_1	clone_P190604:9784:1	P190604	P190604_TRAV13-2_TGTGCAGAGACAGTCGGGGAATATGGAAACAAGCTGGTCTTT_TRAJ47:P190604_TRBV6-5_TGTGCCAGCAGGGGCAGAGCGGGAAGCGCCAAAAACATTCAGTACTTC_TRBJ2-4	TRAC	TRAV13-2	TRAJ47	TGTGCAGAGACAGTCGGGGAATATGGAAACAAGCTGGTCTTT	TRAC	TRBV6-5	TRBJ2-4	TGTGCCAGCAGGGGCAGAGCGGGAAGCGCCAAAAACATTCAGTACTTC	1	Liver	9784	FALSE	FALSE	FALSE
AGCAGCCGTAAATACG-1-P190604_Liver_1	clone_P190604:9965:8	P190604	P190604_TRAV19_TGTGCTCTGAATACCAGGCAGGCAGGAACTGCTCTGATCTTT_TRAJ15:P190604_TRBV11-2_TGTGCCAGCAGCTTAGCACCACAGGTTTATTCACCCCTCCACTTT_TRBJ1-6	TRAC	TRAV19	TRAJ15	TGTGCTCTGAATACCAGGCAGGCAGGAACTGCTCTGATCTTT	TRAC	TRBV11-2	TRBJ1-6	TGTGCCAGCAGCTTAGCACCACAGGTTTATTCACCCCTCCACTTT	8	Liver	9965	TRUE	FALSE	FALSE
AGCATACAGCTCCTTC-1-P190604_Liver_1	clone_P190604:10398:1	P190604	P190604_TRAV29/DV5_TGTGCAGCAAAAGTTTCAGGAGGAGGTGCTGACGGACTCACCTTT_TRAJ45:P190604_TRBV28_TGTGCCAGCAGTTGGCGGGGAGATATCGGTGGCTACACCTTC_TRBJ1-2	TRAC	TRAV29/DV5	TRAJ45	TGTGCAGCAAAAGTTTCAGGAGGAGGTGCTGACGGACTCACCTTT	TRAC	TRBV28	TRBJ1-2	TGTGCCAGCAGTTGGCGGGGAGATATCGGTGGCTACACCTTC	1	Liver	10398	FALSE	FALSE	FALSE
AGCATACGTAAAGGAG-1-P190604_Liver_1	clone_P190604:9497:1	P190604	P190604_TRAV10_TGTGTGGTGATCCCTTCAAGGTCTGCAGGCAACAAGCTAACTTTT_TRAJ17:P190604_TRBV28_TGTGCCAGCAGTTTGGGGGGGGCGGGAGGACCCACAGATACGCAGTATTTT_TRBJ2-3	TRAC	TRAV10	TRAJ17	TGTGTGGTGATCCCTTCAAGGTCTGCAGGCAACAAGCTAACTTTT	TRAC	TRBV28	TRBJ2-3	TGTGCCAGCAGTTTGGGGGGGGCGGGAGGACCCACAGATACGCAGTATTTT	1	Liver	9497	FALSE	FALSE	FALSE
AGCCTAAAGTGTACCT-1-P190604_Liver_1	clone_P190604:9866:1	P190604	P190604_TRAV16_TGTGCTCCCCATTATACTGGAGCCAATAGTAAGCTGACATTT_TRAJ56:P190604_TRBV27_TGTGCCAGCAGTTGGTCCAGCGGGCGCTACAATGAGCAGTTCTTC_TRBJ2-1	TRAC	TRAV16	TRAJ56	TGTGCTCCCCATTATACTGGAGCCAATAGTAAGCTGACATTT	TRAC	TRBV27	TRBJ2-1	TGTGCCAGCAGTTGGTCCAGCGGGCGCTACAATGAGCAGTTCTTC	1	Liver	9866	FALSE	FALSE	FALSE
AGCCTAATCACTTACT-1-P190604_Liver_1	clone_P190604:10652:4	P190604	P190604_TRAV38-2/DV8_TGTGCTTATTCAGGAACCTACAAATACATCTTT_TRAJ40:P190604_TRBV6-5_TGTGCCAGCAGCCCCCTAGGCCCGACTAGTAATTCACCCCTCCACTTT_TRBJ1-6	TRAC	TRAV38-2/DV8	TRAJ40	TGTGCTTATTCAGGAACCTACAAATACATCTTT	TRAC	TRBV6-5	TRBJ1-6	TGTGCCAGCAGCCCCCTAGGCCCGACTAGTAATTCACCCCTCCACTTT	4	Liver	10652	TRUE	FALSE	FALSE
AGCGGTCAGACAAAGG-1-P190604_Liver_1	clone_P190604:10115:29	P190604	P190604_TRAV21_TGTGCTGCGGGGATGGATAGCAACTATCAGTTAATCTGG_TRAJ33:P190604_TRBV27_TGTGCCAGCAGTCCTCGGACAGGGACCGGCGAGCAGTACTTC_TRBJ2-7	TRAC	TRAV21	TRAJ33	TGTGCTGCGGGGATGGATAGCAACTATCAGTTAATCTGG	TRAC	TRBV27	TRBJ2-7	TGTGCCAGCAGTCCTCGGACAGGGACCGGCGAGCAGTACTTC	29	Liver	10115	TRUE	FALSE	FALSE
AGCGGTCTCCCAGGTG-1-P190604_Liver_1	clone_P190604:9827:2	P190604	P190604_TRAV14/DV4_TGTGCAATGAGAGAGGGAGGTGGTGGTACTAGCTATGGAAAGCTGACATTT_TRAJ52:P190604_TRBV4-3_TGCGCCAGCAGCCAAGCTTTAGGACAGGGGTACGAGCAGTACTTC_TRBJ2-7	TRAC	TRAV14/DV4	TRAJ52	TGTGCAATGAGAGAGGGAGGTGGTGGTACTAGCTATGGAAAGCTGACATTT	TRAC	TRBV4-3	TRBJ2-7	TGCGCCAGCAGCCAAGCTTTAGGACAGGGGTACGAGCAGTACTTC	2	Liver	9827	TRUE	FALSE	FALSE
AGCGGTCTCTTCGAGA-1-P190604_Liver_1	clone_P190604:10987:7	P190604	P190604_TRAV9-2_TGTGCTCTGAGAGGGTCTGGTGGCTACAATAAGCTGATTTTT_TRAJ4:P190604_TRBV20-1_TGCAGTGCCGAACTCGGGACGGCCTACGAGCAGTACTTC_TRBJ2-7	TRAC	TRAV9-2	TRAJ4	TGTGCTCTGAGAGGGTCTGGTGGCTACAATAAGCTGATTTTT	TRAC	TRBV20-1	TRBJ2-7	TGCAGTGCCGAACTCGGGACGGCCTACGAGCAGTACTTC	7	Liver	10987	TRUE	FALSE	FALSE
AGCGTATAGGACTGGT-1-P190604_Liver_1	clone_P190604:9657:2	P190604	P190604_TRAV12-3_TGTGCAATGAAAGAGGACTATGGTCAGAATTTTGTCTTT_TRAJ26:P190604_TRBV15_TGTGCCACCAGCATCGACAGGGGGGGCACTGAAGCTTTCTTT_TRBJ1-1	TRAC	TRAV12-3	TRAJ26	TGTGCAATGAAAGAGGACTATGGTCAGAATTTTGTCTTT	TRAC	TRBV15	TRBJ1-1	TGTGCCACCAGCATCGACAGGGGGGGCACTGAAGCTTTCTTT	2	Liver	9657	TRUE	FALSE	FALSE
[truncated: 71,869 more rows]

## Sheet: BCR
barcode	clone.id	patient	bcr_seq	c_gene	v_gene	j_gene	cdr3_nt	CType	clone.seq	clone.freq	loc	identifier	clonal
[truncated: 17,581 more rows]
